# Supplementary material for: Association of obesity, visceral adiposity, and sarcopenia with an increased risk of metabolic syndrome: A retrospective study
Source: PLoS One. 2021 Aug 17;16(8):e0256083. doi: 10.1371/journal.pone.0256083 (PMC8370618; doi:10.1371/journal.pone.0256083)
Supplement: S1 File — (XLSX) [file pone.0256083.s001.xlsx]

## Sheet: tmp_kim_CRP
ID	Sex	Age	WBC	Hb	plt	alb	bil_t	alk_ph	GOT	GPT	GGT	chol	LDL	TG	HDL	BUN	Cr	glu	WC	mhx_HT_yn	HT	mhx_DM_yn	DM	LowHDL	TG_Medi	DysL_	mhx_dyslipidemia_yn	HighTG	bexam_ht	bexam_wt	bexam_wc	bexam_hc	bexam_BMI	Obesity	bexam_BP_systolic	bexam_BP_diastolic	ASM_kg	ASM_Wt%	Sarco_ASM_Wt%	VFA_cm2	VFA_	shx_smoke_yn	shx_alcohol_yn	insulin	HbA1c	uric_acid	CRP
1	2	82.5178	8.75	12.6	217	4.4	0.7	88	99	50	145	171	84	182	51	12	0.62	140	1	1	1	1	1	0	1	1	1	1	143	69.2	107	112	33.8	1	155	82	11.45	16.5462	1	200.5	1	0	0		6.5	6.1	0.51
2	1	33.8	9.2	15.7	330	4.2	1	71	160	275	91	202	118	123	59	10	0.66	145	1	0	0	0	1	0	0	0	0	0	186.2	185.4	155	152.5	53.5	1	137	87	39.83	21.4833	1	347.7	1	0	0		8.9	6.2	1.38
3	1	64.2384	5.38	16	229	4.5	1.6	93	30	38	21	204	140	75	49	15	0.62	74	0	1	1	0	0	0	0	0	0	0	156.8	55	84	96.5	22.4	0	125	85	11.94	21.7091	1	372.7	1	0	0		4.9	6.4	0.14
4	2	31.6438	8.59	10.4	186	3.9	0.7	73	43	38	24	185	102	228	37	10	0.75	145	1	1	1	1	1	1	1	1	0	1	166.2	147.2	155	150	68.1	1	161	102	25.2891	17.1801	1	292.226	1	0	0		7.2	5.8	1.41
5	2	54.9068	5.67	15.1	269	4.1	0.7	96	24	25	23	210	142	105	47	12	0.43	111	1	1	1	0	0	1	0	1	0	0	150.8	62.2	90	98	27.3	1	150	96	11.48	18.4566	1	297.5	1	0	1		5.9	4.8	0.48
6	1	59.0301	4.07	16.3	155	4.2	2.2	70	37	41	30	270	147	395	44	16	1.06	86	1	0	1	0	0	0	1	1	0	1	168.4	73.3	102	96	26	1	157	102	16.21	22.1146	1	239.2	1	0	0		5.3	5.4	0.08
7	2	24.0301	6.96	12.4	279	4.3	0.3	59	18	7	27	184	78	174	71	9	0.24	85	1	0	0	0	0	0	1	1	0	1	163.2	70.7	88	104	26.5	1	109	77	13.24	18.727	1	187.5	1	0	1		5.2	4.9	1.63
8	2	63.9452	6.73	14.6	230	4.4	0.8	46	18	7	11	238	156	168	48	15	0.46	79	1	1	1	0	0	1	1	1	0	1	146.8	54.7	88	94	25.4	1	121	77	10.33	18.8848	1	132.5	1	0	0		5.3	5.1	0.38
9	2	38.2301	6.59	13.2	308	4.7	1.1	84	23	16	14	164	88	66	63	13	0.77	94	1	0	0	0	0	0	0	0	0	0	158.4	96.4	89	118	38.6	1	126	89	18.34	19.0249	1	203.8	1	0	1		5.5	6.8	0.83
10	2	78.6192	8.09	13.1	123	4	0.6	85	56	11	108	213	138	125	50	10	0.85	104	1	1	1	0	0	0	0	0	0	0	146.6	64.6	99	97.5	30.1	1	131	82	12.33	19.0867	1	143.8	1	0	0		5.6	5.2	0.26
11	1	43.8959	8.14	18	285	4.6	1.1	93	39	40	22	217	146	153	40	26	1.5	93	0	1	1	0	0	0	1	1	1	1	149.1	79.6	100	108	35.8	1	126	80	17.64	22.1608	1	252.5	1	0	1		5.4	6.7	0.21
12	2	69.5233	4.56	12.3	311	4.2	0.8	110	34	31	20	163	89	135	47	9	0.56	112	1	1	1	0	0	1	1	1	1	0	149.2	79.1	110	108	35.6	1	122	66	15.2	19.2162	1	198.9	1	0	0		6.3	4.8	0.23
13	2	69.2219	13	11.8	386	4.5	0.9	89	44	61	86	258	146	253	61	15	1.06	206	1	1	1	1	1	0	1	1	1	1	162.5	77.2	107	105	29.2	1	141	108	14.97	19.3912	1	231.6	1	0	0		7.3	8.8	2.35
14	2	49.2082	7.26	13.8	322	4.3	0.8	87	25	28	16	228	142	166	53	9	0.84	101	1	0	0	0	0	0	1	1	1	1	155.8	89.1	105	120	36.7	1	116	77	17.58	19.7306	1	195.2	1	0	0		5.9	6.1	0.39
15	2	79.863	6.36	13.9	296	4.4	0.7	62	21	15	17	203	130	158	41	12	0.61	107	1	1	1	0	0	1	1	1	1	1	142.6	52.5	90	87	25.7	1	142	72	10.36	19.7333	1	112.4	1	0	0		5.8	4.2	0.04
16	2	69.0849	5.9	14.6	263	4.3	0.7	53	32	23	15	204	134	76	55	15	0.68	84	1	1	1	0	0	0	0	0	0	0	140.1	51.8	93	94	26.4	1	134	78	10.2945	19.8736	1	119.252	1	0	0		6	5.6	0.09
17	2	59.5973	6.68	13.6	297	4.3	0.5	75	37	44	18	192	99	67	80	23	1.73	92	1	1	1	0	0	0	0	0	0	0	146.4	57.9	90	92	27.2	1	108	83	11.55	19.9482	1	126.1	1	0	0		6.2	6.9	0.05
18	2	72.8521	5.98	13.2	177	4.2	1.2	54	23	19	27	207	116	77	76	7	0.48	120	1	1	1	0	0	0	0	0	0	0	149.1	62.7	95	97	28.2	1	130	86	12.55	20.0159	1	156.6	1	0	0		5.1	2.9	0.09
19	2	74.1479	8.71	11.5	357	3.9	0.6	54	20	20	12	206	131	105	54	14	0.61	97	0	0	0	0	0	0	0	0	0	0	149.8	52.4	84	91.5	23.4	0	120	89	10.57	20.1718	1	125	1	0	0		6.1	2.6	0.11
20	2	73.0466	8.07	14.2	292	4.3	0.6	95	23	23	34	184	103	131	55	16	0.54	103	1	1	1	0	0	0	0	0	0	0	150.4	60.3	91.5	98	26.8	1	140	72	12.2	20.2322	1	136.5	1	0	0		5.8	5.5	0.18
21	2	57.811	6.97	14.9	267	4.5	0.8	68	24	30	19	137	67	81	54	13	0.68	132	1	1	1	1	1	0	1	1	1	0	151	68.8	98	92	30.2	1	114	77	13.95	20.2762	1	149.9	1	0	0		7	5.6	0.27
22	2	74.5452	5.74	13.6	240	4.5	0.7	85	29	19	23	210	116	119	70	19	0.84	80	0	0	0	0	0	0	0	0	0	0	145.1	48.4	83	94	23	0	122	78	9.8192	20.2876	1	96.6817	0	0	0		5.8	5.9	0.07
23	2	40.2438	9.91	14.8	243	4.3	0.6	59	19	29	33	200	132	134	41	9	0.56	115	1	0	1	0	0	1	0	1	0	0	161.5	106.6	122	128	40.9	1	165	111	21.64	20.3002	1	236.6	1	1	1		6.6	5.3	1.21
24	2	53.0521	8.16	14	346	4.5	0.7	123	19	16	24	386	305	138	53	18	0.58	85	1	0	0	0	0	0	0	0	0	0	147.8	54.9	90	94	25.1	1	108	69	11.16	20.3279	1	107.5	1	0	0		5.4	7.5	0.49
25	2	43.189	9.78	15	183	4.4	1.2	119	21	21	19	175	101	106	53	11	0.55	83	1	0	0	0	0	0	0	0	0	0	154.7	93.1	120	118	38.9	1	130	86	18.93	20.333	1	139.2	1	0	0		6.1	6.8	2.08
26	2	63.6027	5.93	14.6	241	4.3	0.8	77	20	11	15	210	130	69	66	24	0.55	118	0	0	0	0	0	0	0	0	0	0	142.5	59.4	86	97	29	1	126	84	12.1033	20.376	1	142.467	1	0	1		5.9	3.9	0.1
27	2	80.8685	5.91	12.1	246	4.4	0.5	86	20	16	15	164	90	133	47	24	0.88	104	1	1	1	0	0	1	1	1	1	0	152.3	77.7	104	110	33.5	1	140	71	15.85	20.399	1	203.1	1	0	0		6.1	5.9	0.15
28	2	65.7534	5.95	14.2	365	4.4	1.3	69	29	31	26	236	149	152	57	16	0.5	109	1	0	0	0	0	0	1	1	0	1	146.7	62.1	98	102	28.9	1	110	64	12.67	20.4026	1	136.5	1	0	0		6.5	4.4	0.14
29	2	24.7781	7.7	13.2	348	4.3	0.9	64	15	13	8	176	123	87	36	19	0.83	112	0	0	1	0	0	1	0	1	0	0	140.5	45.4	69	87	22.8	0	124	98	9.27	20.4185	1	103.6	1	0	0		6.1	12.2	2.11
30	2	80.1781	4.45	14.3	227	4.3	0.9	62	36	30	69	226	164	100	42	20	0.62	99	0	1	1	1	1	1	0	1	0	0	146.8	50.6	81	91	23.5	0	120	89	10.34	20.4348	1	107.7	1	0	0		5.4	4.9	0.07
31	1	27.1562	8.75	16.5	282	4.5	1	79	36	50	53	258	161	251	47	13	1.12	94	1	0	1	0	0	0	1	1	0	1	177.6	144.3	135	130	45.7	1	153	119	32.49	22.5156	1	320.9	1	0	0		5.3	8.9	0.47
32	2	78.2027	3.62	13.6	272	4	0.6	91	49	36	11	223	169	52	44	12	0.61	83	0	0	0	0	0	1	0	1	0	0	142.4	41	84	82	20.2	0	112	69	8.43	20.561	1	65.5	0	0	0		5.3	4.1	0.07
33	2	63.4959	7.53	13	280	4.2	1.1	52	26	32	12	161	76	91	67	16	0.59	100	1	1	1	0	0	0	1	1	1	0	153.9	66.6	89	101	28.1	1	122	66	13.7	20.5706	1	383.1	1	0	1		5.5	4.6	0.06
34	2	82.9123	7.38	13.9	306	4.2	0.8	51	23	18	20	252	132	317	57	22	0.96	98	1	1	1	0	0	0	1	1	0	1	147.3	66.9	104	97	30.8	1	130	74	13.81	20.6428	1	134	1	0	1		5.8	6.8	0.17
35	2	73.5178	5.9	13.1	185	4.3	0.7	65	35	37	50	165	84	91	63	16	0.66	88	1	1	1	0	0	0	1	1	1	0	151.3	62.2	97	95	27.2	1	92	67	12.85	20.6592	1	111	1	0	0		5.7	6.6	0.07
36	2	75.3973	6.7	15.2	337	4.7	0.8	45	22	22	17	260	185	108	53	19	0.5	103	0	1	1	0	0	0	0	0	0	0	144.8	45.9	86	88	21.9	0	117	69	9.49	20.6754	1	108.7	1	0	0		6	3.4	0.02
37	2	48.9808	9.28	15.4	284	4.3	0.8	92	37	49	22	245	167	158	46	10	0.9	112	1	0	1	0	0	1	1	1	0	1	161.5	99.7	107.5	121.5	38	1	124	98	20.64	20.7021	1	209.6	1	0	0		5.9	8.2	0.91
38	2	34.6959	5.81	14.1	290	4.6	0.9	48	18	13	11	164	94	142	42	12	0.76	105	1	1	1	1	1	1	1	1	1	0	155	71.2	90	100	29.6	1	123	91	14.74	20.7022	1	143.6	1	0	0		7.1	6.1	0.15
39	2	73.0932	5.12	12.6	200	4.2	0.6	75	24	17	10	197	122	65	62	21	0.58	84	1	0	0	0	0	0	0	0	0	0	146.5	55.2	94	96	25.5	1	99	71	11.44	20.7246	1	114.3	1	0	0		5.6	4.7	0.02
40	2	55.537	6.55	15.3	278	4.7	1	69	70	68	25	240	170	102	50	12	0.57	98	1	0	0	0	0	0	0	0	0	0	157.3	73	102	101	29.5	1	123	83	15.15	20.7534	1	187.1	1	0	0		5.8	5.4	0.44
41	2	71.4849	6.96	14.6	217	4.5	0.8	53	34	29	17	163	89	116	51	9	0.58	96	0	0	1	0	0	0	0	0	0	0	144.1	55.4	84.5	91.5	26.7	1	136	90	11.5	20.7581	1	116.9	1	0	0		6.4	4.9	0.1
42	2	58.1205	6.87	15.1	230	4.5	1	109	34	30	24	217	135	55	71	22	0.78	54	1	1	1	0	0	0	0	0	0	0	149.7	55.1	89	98	24.6	0	123	88	11.45	20.7804	1	138.6	1	0	0		5.3	9.7	0.05
43	2	66.8329	12.75	14.1	307	4.8	1.2	109	34	27	63	285	180	293	46	10	0.61	117	1	1	1	0	0	1	1	1	0	1	141.5	57.5	95	95	28.7	1	138	79	11.95	20.7826	1	126.9	1	0	0		6.3	5.1	0.24
44	2	79.5562	5.12	13.7	241	4	0.6	107	26	20	25	219	141	141	50	11	0.51	106	1	1	1	0	0	0	0	0	0	0	149.3	62.3	95	100	27.9	1	116	67	12.98	20.8347	1	138.4	1	0	0		6	3.4	0.17
45	2	68.3808	5.43	17.1	214	4.5	1.1	73	36	23	73	211	119	137	65	21	1.09	71	0	1	1	0	0	0	0	0	0	0	146.4	44.2	81.5	78	20.7	0	129	95	9.21	20.8371	1	110.1	1	0	1		5	4.6	0.05
46	2	60.263	6.46	11.3	352	4.3	0.6	131	46	40	109	184	117	52	57	8	0.74	74	0	0	0	0	0	0	0	0	0	0	140.3	42	73	86	21.4	0	111	72	8.75772	20.8517	1	74.5041	0	0	0		5.9	4.6	1.1
47	2	76.3507	7.15	12.8	275	4.2	0.8	89	19	8	19	153	96	75	42	42	1.64	94	1	1	1	0	0	1	0	1	0	0	152.2	59.8	93	93	25.9	1	120	71	12.49	20.8863	1	145.7	1	0	0		5.8	6.9	0.87
48	2	58.0137	4.36	13.4	308	4.6	0.7	82	33	20	55	225	117	131	82	14	0.6	97	1	1	1	0	0	0	0	0	0	0	153.9	68.4	90	105	28.9	1	114	87	14.29	20.8918	1	155.3	1	0	1		5.7	5.6	0.23
49	2	38.4932	7.83	12.8	367	4.1	0.8	66	59	71	31	173	97	75	61	14	0.68	91	1	0	1	0	0	0	0	0	0	0	160.3	92.9	110	114	36.3	1	141	103	19.43	20.915	1	151.3	1	0	1		5.5	5.3	0.26
50	1	64.1288	7.39	14.4	269	4.3	1	69	58	73	37	164	91	132	47	9	0.71	114	1	0	0	0	0	0	0	0	0	0	159.6	101.5	118	115	39.8	1	110	63	22.94	22.601	1	259	1	0	0		7.2	5.1	0.17
51	2	68.2959	5.09	14.7	183	3.8	1	128	25	20	9	216	149	91	49	10	0.6	80	1	1	1	0	0	1	0	1	0	0	149.4	57.5	95	100	25.8	1	111	75	12.03	20.9217	1	130.9	1	0	0		5.7	4.6	0.03
52	2	56.2027	6.62	14	298	4.4	0.9	83	51	72	39	219	150	137	42	10	0.62	140	1	1	1	1	1	1	1	1	1	0	163.7	93.3	108	121.5	34.8	1	129	85	19.53	20.9325	1	190.4	1	0	0		6.9	7.2	0.27
53	2	68.7096	6.77	15.2	256	3.9	0.9	68	26	21	12	168	84	74	69	20	0.72	86	0	0	0	0	0	0	1	1	1	0	145.8	53.1	87	90	24.9	0	110	68	11.12	20.9416	1	97	0	0	0		5.6	4.1	0.05
54	2	68.1068	5.66	14	145	4.2	0.9	137	50	52	142	214	147	68	53	12	0.74	111	1	0	0	0	0	0	0	0	0	0	156.8	60.1	90	100	24.4	0	115	72	12.6	20.9651	1	140.5	1	0	0		5.7	4.2	0.25
55	2	63.474	4.4	14.1	197	4.2	1.1	45	24	24	14	150	80	53	59	17	0.65	102	1	1	1	0	0	0	0	0	0	0	145.9	57.1	91	98	26.8	1	99	67	11.98	20.9807	1	85.7	0	0	0		6.1	6.6	0.04
56	2	46.011	8.15	14	408	4.1	0.4	78	25	23	216	276	178	254	47	7	0.49	98	1	1	1	0	0	1	1	1	1	1	143.8	67.3	106	93	32.5	1	116	90	14.13	20.9955	1	132.1	1	1	1		6.1	4.2	0.34
57	2	82.1808	2.43	11.1	145	4.1	0.6	50	49	27	112	169	102	103	46	12	0.95	108	1	1	1	0	0	1	0	1	0	0	149.6	55.8	98	102	24.9	0	124	80	11.72	21.0036	1	102.5	1	0	0		6.4	6.9	0.05
58	2	75.9644	6.63	14.4	227	4.1	2.2	62	37	37	29	287	184	237	56	14	0.59	89	1	0	0	0	0	0	1	1	1	1	148.4	59.5	96	98	27	1	123	67	12.5	21.0084	1	141.7	1	0	0		5.1	5.8	0.21
59	2	59.8986	5.74	14.6	291	4.2	0.9	77	24	15	9	237	174	63	50	13	0.84	75	1	0	0	0	0	0	1	1	1	0	151	64.4	94	102	28.2	1	114	73	13.53	21.0093	1	145.9	1	0	1		5.1	5	0.12
60	2	62.6603	3.49	12.9	285	4.1	0.5	137	15	9	31	259	159	79	84	8	0.71	98	0	0	0	0	0	0	0	0	0	0	145.3	49.7	79	94	23.5	0	107	73	10.45	21.0262	1	112.2	1	0	0		5.1	2.8	0.09
61	2	59.8329	7.92	14.3	230	4.6	0.7	86	22	20	24	195	116	59	67	11	0.47	132	0	1	1	1	1	0	1	1	1	0	151.3	52.7	86	90	23	0	119	68	11.09	21.0436	1	102.4	1	0	0		7.2	4.1	0.4
62	2	67.8986	5.09	13.9	294	4.6	1.3	86	36	28	24	219	140	98	59	14	0.67	84	1	0	1	0	0	0	0	0	0	0	147.8	56	91	95	25.6	1	117	97	11.7947	21.062	1	133.643	1	0	1		5.3	4.9	0.17
63	2	63.5452	8.07	13.4	410	4.5	0.7	85	18	22	44	243	166	72	63	9	0.67	104	1	1	1	0	0	0	0	0	0	0	142.3	50.8	88	85	25.2	1	137	74	10.7	21.063	1	96.3	0	0	0		5.8	4.2	0.17
64	2	71.8411	5.09	13.9	217	4.2	0.9	65	20	15	13	171	103	89	50	14	0.5	126	1	1	1	1	1	0	0	0	0	0	148.8	66.3	92	106	29.9	1	126	77	13.99	21.1011	1	148.8	1	0	0		6.4	3.3	0.05
65	2	61.6932	4.32	13.5	312	4.2	0.7	69	23	13	17	214	112	197	63	11	0.58	87	1	0	0	0	0	0	1	1	0	1	153.4	81.2	98	109	34.7	1	126	75	17.14	21.1084	1	166.7	1	0	0		5.8	4.4	0.06
66	2	52.789	4.13	14.1	249	4.3	1	45	23	24	9	238	167	141	43	9	0.7	90	1	0	0	0	0	1	0	1	0	0	153.1	70.8	91	99	30.2	1	108	77	14.95	21.1158	1	111.8	1	0	1		5.3	2.9	0.02
67	2	55.9616	6.57	12.2	325	4.4	0.6	83	33	25	27	159	88	83	54	17	0.69	86	1	1	1	0	0	0	1	1	1	0	150.9	55.5	90	94	24.4	0	91	64	11.72	21.1171	1	102.6	1	0	1		5.6	4.9	0.02
68	2	38.9288	7.92	11.5	567	4.1	0.4	75	17	28	97	231	150	132	55	10	0.65	82	1	0	0	0	0	0	0	0	0	0	147	64.7	92	105	29.9	1	105	70	13.67	21.1283	1	100.6	1	0	0		5.5	4.9	0.12
69	2	70.8767	4.67	12.8	243	4.4	0.8	76	33	25	34	240	153	64	74	22	0.69	77	1	0	0	0	0	0	0	0	0	0	148.4	55	95	100	25	1	122	66	11.63	21.1455	1	144.1	1	0	0		5.3	4.8	0.12
70	2	63.8849	11.75	14.7	296	4.3	0.7	80	18	21	17	202	112	92	72	10	0.62	76	1	0	0	0	0	0	0	0	0	0	152.7	77.6	100	106	33.3	1	129	78	16.41	21.1469	1	180	1	0	0		5.8	6	0.06
71	2	69.6192	4.69	12.4	234	4.4	1	102	26	20	35	171	81	60	78	25	0.97	82	1	1	1	0	0	0	1	1	1	0	145.4	55.9	90	94	26.6	1	127	79	11.8323	21.167	1	104.899	1	0	0		5.7	7.7	0.12
72	2	68.2986	4.8	12.7	241	4.3	0.6	72	36	31	19	161	74	132	61	14	0.75	97	0	1	1	0	0	0	0	0	0	0	148.1	56.3	87	100	25.7	1	117	84	11.92	21.1723	1	78.7	0	0	1		5.7	5.6	0.04
73	2	64.0712	6.84	13.6	215	4.1	0.9	84	33	23	11	176	104	43	63	30	0.52	69	1	0	0	0	0	0	0	0	0	0	145.7	52.3	92	92	24.6	0	93	67	11.08	21.1855	1	105.4	1	0	0		5.2	4.3	0.82
74	2	68.8384	7.04	14.8	278	4.5	0.8	85	20	18	16	222	148	129	48	15	0.61	100	1	1	1	0	0	1	0	1	0	0	151.1	67.1	95	101	29.4	1	135	85	14.22	21.1923	1	186.6	1	0	0		5.3	4.4	0.04
75	2	64.0438	7.09	13.5	201	4.6	1	106	25	23	29	131	68	146	34	15	0.87	182	1	1	1	1	1	1	1	1	1	0	147.3	62.4	98	95	28.8	1	95	63	13.25	21.234	1	150.5	1	0	0		7.1	4.5	0.31
76	2	86.6521	7.1	12	359	4.3	0.4	109	24	15	14	207	106	102	81	20	0.75	106	1	1	1	0	0	0	0	0	0	0	142.5	49.4	89	94	24.2	0	145	80	10.5	21.2551	1	99.8	0	0	0		6.4	6	0.18
77	2	69.474	7.92	14.5	291	4.5	1	96	62	59	28	250	150	127	75	11	0.57	90	1	0	0	0	0	0	0	0	0	0	146.8	61.2	96	105	28.4	1	113	75	13.01	21.2582	1	111.3	1	0	0		5.8	6.6	0.41
78	2	48.2795	4.23	7.9	412	4.3	0.5	65	19	12	27	204	125	200	39	7	0.46	103	0	0	0	0	0	1	1	1	1	1	148	59	80	103	26.9	1	125	84	12.55	21.2712	1	166.6	1	0	0		5.7	4	0.11
79	2	68.7123	5.19	13.8	234	4.7	1.1	69	27	19	16	130	67	56	52	16	0.48	94	1	1	1	0	0	0	1	1	1	0	149.5	66.5	94	100	29.8	1	136	94	14.15	21.2782	1	154.1	1	0	0		5.4	3.8	0.09
80	2	46.2904	7.48	11.6	509	4.2	0.4	70	17	18	22	201	130	71	57	10	0.54	139	1	0	0	0	1	0	0	0	0	0	153.7	72.4	97	99	30.6	1	109	69	15.41	21.2845	1	139.4	1	0	0		6.9	4.4	0.32
81	2	68.2493	7.16	15	205	4.1	0.6	82	26	29	15	160	95	83	48	13	0.63	106	1	1	1	0	0	1	0	1	0	0	147.1	62.9	95	103	29.1	1	116	84	13.39	21.2878	1	159.2	1	0	0		5.8	6.3	0.32
82	2	52.4137	8.88	15.6	375	4.3	0.7	151	25	21	28	325	223	265	49	13	0.74	118	1	0	1	0	0	1	1	1	0	1	150.1	69.7	90	100	31	1	137	100	14.85	21.3056	1	146.3	1	0	1		6	5.7	0.08
83	2	51.4767	4.02	13.7	243	4.1	0.9	83	20	17	11	189	113	105	55	15	0.63	93	1	0	1	0	0	0	0	0	0	0	157.1	78.2	95	113	31.7	1	122	91	16.67	21.3171	1	185.9	1	0	0		5.6	5.7	0.06
84	2	72.4767	7.45	13.4	290	4.2	0.6	97	23	19	10	216	129	128	61	26	1.2	105	1	1	1	1	1	0	1	1	1	0	142.5	59.2	89	96	29	1	149	78	12.64	21.3514	1	118.1	1	0	0		5.7	7.1	0.07
85	2	74.2055	4.67	13.9	200	4.4	1	86	33	26	20	226	149	136	50	11	0.88	117	0	0	1	0	0	0	0	0	0	0	150.7	59.3	79	89	26.1	1	181	98	12.68	21.3828	1	144.9	1	0	0		5.2	4.4	0.28
86	2	71.9425	5	12.7	229	4.3	1.1	60	27	23	12	253	172	118	57	12	0.66	92	1	1	1	0	0	0	0	0	0	0	156.9	77.3	101.5	109	31.4	1	138	93	16.54	21.3972	1	135.7	1	0	0		5.7	4.8	0.08
87	2	71.5151	4.83	13.1	225	4.4	1	93	34	34	28	222	144	189	40	12	0.66	103	1	0	0	0	0	1	1	1	0	1	147.8	63.7	93	94	29.1	1	134	82	13.63	21.3972	1	158.6	1	0	0		5.7	3.8	0.51
88	1	40.011	8.04	14.9	279	4.1	1.2	80	18	21	21	173	121	82	36	10	1.09	83	1	1	1	0	0	1	0	1	0	0	178	131.2	127	123	41.4	1	131	95	29.88	22.7744	1	383.5	1	0	0		5.5	10.2	1.81
89	2	30.5726	5.1	14.1	274	4.2	0.8	35	15	18	17	175	100	104	54	9	0.51	93	1	0	0	0	0	0	0	0	0	0	151.3	60.6	90.5	101	26.6	1	109	77	12.97	21.4026	1	132.1	1	0	0		5.7	4.5	0.02
90	2	31.7973	7.36	15.1	339	4.5	0.6	64	26	30	22	267	180	122	63	9	0.66	88	1	0	0	0	0	0	0	0	0	0	169.3	96.8	111	117	33.8	1	127	89	20.72	21.405	1	250.1	1	0	0		5.4	5.3	0.8
91	2	62.7342	7.51	15.1	206	4.3	1.1	68	29	53	16	157	81	102	56	21	0.76	90	1	1	1	0	0	0	0	0	0	0	156.1	86.2	106	113	35.4	1	124	91	18.46	21.4153	1	219.7	1	1	0		5.3	6.1	0.3
92	2	55.2795	4.56	15.6	175	4.5	1.5	111	27	21	16	183	116	57	56	11	0.62	91	1	0	0	0	0	0	0	0	0	0	155.4	61.9	91	107	25.6	1	106	82	13.26	21.4216	1	121.2	1	0	0		5.1	4.5	0.03
93	2	38.7753	5.62	14.2	439	4.3	0.7	77	17	12	9	242	171	62	59	5	0.65	86	0	0	0	0	0	0	0	0	0	0	156.7	67.8	87	113	27.6	1	119	84	14.53	21.4307	1	115.9	1	0	1		5.4	4.9	0.18
94	2	60.2164	7	12.8	251	4.3	0.7	71	21	26	27	180	99	88	63	16	0.59	92	1	1	1	0	0	0	0	0	0	0	153.8	77.7	102	112	32.8	1	144	97	16.66	21.4414	1	140	1	0	0		5.6	4.8	0.12
95	2	57.0822	7.31	14.5	271	4.1	0.7	108	30	34	80	232	146	193	47	15	0.66	120	1	1	1	0	0	1	1	1	0	1	152.6	63.9	90	97	27.3	1	109	82	13.71	21.4554	1	145.4	1	0	0		5.6	5.6	0.19
96	2	55.0521	6.16	14.2	332	4.3	0.9	90	27	22	14	146	71	52	65	17	0.73	100	1	1	1	1	1	0	1	1	1	0	152.1	69.8	95	96	30.2	1	125	81	14.98	21.4613	1	163.3	1	0	0		6.6	5.8	0.08
97	2	73.2658	8.71	15.8	212	4.3	1.5	62	43	47	69	194	103	112	69	15	0.7	186	1	0	0	0	1	0	1	1	1	0	154.1	72.6	97	101	30.6	1	136	82	15.59	21.4738	1	168.8	1	0	0		8.6	4	0.11
98	2	58.2575	5.4	14.9	242	4.5	0.9	220	48	67	272	180	101	99	59	12	0.54	148	1	1	1	1	1	0	1	1	1	0	145	54.9	93	100	26.1	1	101	74	11.8	21.4936	1	124.3	1	0	0	14.5	6.1	4.4	0.23
99	2	75.5973	5.97	14.2	207	4.4	0.8	100	40	32	14	175	104	125	46	18	0.9	136	1	0	0	1	1	1	1	1	1	0	154.4	69.7	101	108	29.4	1	134	80	14.99	21.5065	1	145.9	1	0	0		7.1	5.3	0.05
100	2	56.5425	6.33	13.7	272	4.5	0.4	68	19	17	17	240	160	143	51	16	0.57	107	0	0	0	0	0	0	1	1	1	0	150.5	54.9	87.5	88	24.1	0	103	77	11.81	21.5118	1	138.7	1	0	0		5.8	5.9	0.02
101	2	52.5151	4.51	13	301	4.3	1	54	25	21	18	215	145	58	58	10	0.64	94	0	0	0	0	0	0	0	0	0	0	151.4	60.2	86.5	94	26.4	1	113	80	12.96	21.5282	1	120.5	1	0	1		5.4	4.7	0.02
102	2	64.863	3.75	15.1	246	4.4	0.7	72	26	31	25	168	76	51	82	13	0.59	89	0	0	0	1	1	0	1	1	1	0	147.1	61.3	85	99	28.3	1	110	70	13.22	21.5661	1	125.9	1	0	0		6.8	3.5	0.03
103	2	61.5562	6.21	13.9	191	4.4	0.9	59	28	35	20	233	158	65	62	14	0.77	110	1	0	0	0	0	0	0	0	0	0	154.2	68.6	97	105	28.9	1	126	88	14.81	21.5889	1	113.7	1	0	0		6.9	5.9	0.41
104	2	72.3781	7.12	14.5	278	4.2	0.8	61	21	25	21	181	110	93	52	13	0.66	127	1	0	0	1	1	0	1	1	1	0	149	51.7	94	99	23.3	0	121	59	11.17	21.6054	1	103.1	1	0	0		7.1	3.9	0.05
105	2	69.6438	7.59	14.6	251	4.2	1.2	157	244	471	182	173	96	80	61	14	0.66	113	1	1	1	0	0	0	1	1	1	0	152.7	59	93	94.5	25.3	1	136	74	12.75	21.6102	1	143.6	1	0	0		7.2	4.8	1.23
106	1	31.211	18.27	15.8	348	4.4	0.7	98	33	47	118	238	152	251	36	7	0.72	76	1	0	1	0	0	1	1	1	0	1	157.8	77.7	106.5	102	31.2	1	142	112	17.76	22.8571	1	192.6	1	1	1		5.8	7.4	1.72
107	2	62.9753	4.16	13.4	227	4.4	0.9	87	38	40	22	153	45	327	43	12	0.59	141	1	0	0	1	1	1	1	1	1	1	154	65.8	100	98	27.7	1	100	66	14.22	21.6109	1	122.2	1	0	0		7.1	4.1	0.08
108	2	80.0658	6.29	13.7	184	4	0.8	67	20	14	19	204	132	123	47	16	0.88	92	1	1	1	0	0	1	0	1	0	0	146.8	56.4	99	101	26.2	1	118	68	12.19	21.6135	1	94.7	0	0	0		5.2	4.3	0.03
109	1	54.2164	8.2	18.1	237	4.7	2.9	77	35	35	25	244	183	96	42	16	1.03	87	1	0	1	0	0	0	0	0	0	0	157.1	82.1	103	103.5	33.3	1	149	108	18.95	23.0816	1	264.3	1	0	1		5.3	8.2	0.08
110	2	65.2219	6.07	12.8	331	4.6	0.7	75	23	32	20	169	69	126	75	10	0.52	112	1	1	1	0	0	0	1	1	1	0	147.6	69.8	99	102	32	1	114	75	15.09	21.6189	1	107.8	1	0	0		6	5.6	0.02
111	2	72.3288	6.04	13.9	243	4.4	0.9	92	22	25	21	151	64	204	46	10	0.57	112	1	0	0	0	0	1	1	1	1	1	149.8	63.8	98	101	28.4	1	125	80	13.8	21.6301	1	166.3	1	0	0		6.7	4	0.1
112	2	55.3205	4.98	13.6	164	4.2	0.9	63	26	18	56	172	92	42	72	17	0.75	91	1	0	0	0	0	0	0	0	0	0	156	85.6	106	113	35.2	1	125	87	18.53	21.6472	1	135.7	1	0	1		5.3	6.1	0.33
113	2	65.5452	4.44	14.9	214	4.4	0.9	77	37	40	24	216	146	82	54	14	0.77	97	0	0	0	0	0	0	0	0	0	0	154.2	60.2	84	96	25.3	1	119	74	13.05	21.6777	1	151.2	1	0	0		5.4	5.2	0.09
114	2	63.463	5.51	13.2	198	4.3	2	123	24	20	15	342	273	100	49	11	0.49	93	0	1	1	0	0	1	0	1	0	0	148.8	62.5	87	96	28.2	1	116	76	13.55	21.68	1	138.1	1	0	0		5.5	3.5	0.17
115	2	57.9945	5.75	13.4	393	4.2	0.5	112	12	9	12	273	202	85	54	12	0.63	95	1	0	0	0	0	0	0	0	0	0	153.7	68.9	100	106	29.1	1	131	87	14.94	21.6836	1	142.9	1	0	0		6.1	5.2	0.1
116	2	50.2164	6.17	13.2	301	4.2	0.6	70	19	13	13	244	156	111	66	13	0.51	87	1	0	0	0	0	0	0	0	0	0	145.8	61.5	90	108	28.9	1	112	71	13.34	21.6911	1	98.6	0	0	0		5.3	4.5	0.18
117	2	80.5945	6.39	13.6	224	4.4	0.7	56	30	30	21	158	82	86	59	19	0.79	133	1	0	1	1	1	0	1	1	1	0	150.4	59.3	91	98	26.2	1	153	84	12.87	21.7032	1	128.8	1	0	0		6.8	5	0.11
118	1	37.5151	7.18	13.4	375	4.8	0.6	85	23	40	53	234	144	226	45	12	0.87	120	1	0	1	0	0	0	1	1	0	1	174.7	102.7	116	112	33.6	1	141	100	24.21	23.5735	1	226	1	0	1		6.4	8.5	0.32
119	2	69.7205	7.58	13.5	251	4.3	0.8	79	24	21	12	130	70	89	42	11	0.66	108	0	1	1	1	1	1	1	1	1	0	144.3	47.5	84	90	22.9	0	140	85	10.31	21.7053	1	78.2	0	0	0		5.8	4.6	0.08
120	2	54.3014	2.99	13.1	228	4.2	0.8	54	29	23	14	209	135	104	53	10	0.54	95	1	1	1	0	0	0	1	1	1	0	158.1	64.3	91	104	25.7	1	106	79	13.96	21.7107	1	102.1	1	0	0		5.5	5.3	0.04
121	1	62.3233	7.79	17.1	207	4.7	1	50	57	63	74	133	58	139	47	22	0.98	197	0	1	1	1	1	0	1	1	1	0	168.3	76.9	99	98	27.1	1	94	65	18.17	23.6281	1	400.9	1	1	1		8.6	3.4	0.35
122	2	28.1562	7.15	13.7	294	4.1	0.6	79	31	49	27	214	138	183	39	12	0.64	90	1	0	1	0	0	1	1	1	0	1	159	102.3	106	122	40.5	1	140	86	22.22	21.7204	1	189.6	1	0	1		5.4	6.3	0.16
123	2	71.7945	3.54	12.8	242	4.3	0.6	64	20	18	11	297	214	83	66	10	0.49	76	0	0	0	0	0	0	0	0	0	0	157.2	48.2	84	92	19.5	0	89	72	10.47	21.722	1	97.4	0	0	0		5.9	3	1.5
124	2	48.8082	5.96	12.9	249	4.4	0.8	34	30	28	6	153	91	57	51	11	0.66	88	1	0	1	1	1	0	1	1	1	0	165.3	86.1	102	108	31.6	1	123	91	18.71	21.7305	1	134.2	1	0	0		5.5	3	0.15
125	2	72.8329	5.83	11.8	247	4.3	0.9	76	28	20	12	160	81	72	65	13	0.7	108	0	1	1	1	1	0	0	0	0	0	143.8	55.3	84	99	26.7	1	114	74	12.02	21.736	1	88.6	0	0	0		6.5	3.9	0.18
126	2	58.4192	1.97	15	176	4.5	0.5	45	27	15	8	180	114	39	58	15	0.46	81	0	0	0	0	0	0	0	0	0	0	148.2	46.8	71	92	21.3	0	102	72	10.18	21.7521	1	79	0	0	0		5.4	5.6	0.1
127	2	63.1534	4.67	12.8	252	4.4	1.2	92	21	20	10	253	167	90	68	11	0.53	101	1	0	0	0	0	0	0	0	0	0	151.9	58.5	93	102	25.4	1	118	85	12.73	21.7607	1	75.3	0	0	0		5.7	4.9	0.04
128	2	77.389	4.27	12.3	381	4.1	0.5	47	26	22	28	231	130	85	84	19	0.76	99	1	1	1	0	0	0	1	1	1	0	154.2	67	103	98	28.2	1	135	54	14.59	21.7761	1	157.8	1	0	1		6	3.9	0.23
129	2	76.8164	7.71	13.6	256	4	0.5	112	36	32	31	200	138	110	40	12	0.6	135	1	0	0	1	1	1	1	1	1	0	148.2	68.1	99	106	31	1	117	76	14.83	21.7768	1	151	1	0	0		6.6	4.8	0.81
130	2	53.0658	3.47	13.9	272	4	2.1	85	20	19	44	224	141	96	64	13	0.59	109	1	0	0	0	0	0	0	0	0	0	150.5	64.8	92	104	28.6	1	109	78	14.13	21.8056	1	96.3	0	0	1		5.8	4.5	0.05
131	1	73.789	4.38	15.3	183	4.2	1.1	70	50	45	29	156	109	93	28	16	1.04	114	1	1	1	0	0	1	0	1	0	0	168.2	89.1	109	104	31.6	1	138	82	21.13	23.7149	1	276.9	1	0	0		5.6	7.4	0.19
132	2	35.9589	9.02	12.8	309	4.1	0.9	59	37	52	35	178	112	72	52	9	0.62	84	1	0	1	0	0	0	0	0	0	0	158	95.2	105	115	38.1	1	131	90	20.76	21.8067	1	167.5	1	0	0	6.9	5.5	6.7	0.96
133	1	34.8438	6.62	16.4	320	4.8	1.4	69	78	133	62	211	132	178	43	10	0.85	97	1	1	1	0	0	0	1	1	0	1	175.1	116.6	122	120	38	1	143	94	27.66	23.7221	1	226.9	1	0	1		5.8	6.7	0.3
134	2	61.8	7.1	13.6	247	3.9	0.8	79	66	111	73	151	72	66	66	18	0.9	84	0	0	0	0	0	0	0	0	0	0	151.5	56.5	78	100	24.6	0	89	65	12.33	21.823	1	136.5	1	0	0		6.4	6.9	0.52
135	2	69.2247	4.08	11.3	182	4.2	0.8	42	54	30	31	184	125	109	37	8	0.56	126	0	1	1	1	1	1	1	1	1	0	141.6	59	85	101	29.4	1	136	81	12.88	21.8305	1	145.7	1	0	1		6	6.6	0.55
136	2	34.6356	6.39	15	324	4.4	1	72	23	38	30	178	120	93	39	9	0.64	89	0	0	1	0	0	1	0	1	0	0	159.2	87.9	86	114	34.7	1	121	91	19.19	21.8316	1	184.5	1	0	0		5.7	4.6	0.5
137	2	47.3836	4.63	13.5	320	4.2	1.1	57	18	7	10	168	112	55	45	9	0.71	80	1	0	0	0	0	1	0	1	0	0	164.7	79.6	104	116	29.3	1	103	77	17.38	21.8342	1	99	0	0	0		5.3	7.1	0.24
138	2	65.4685	3.94	13	334	4.3	0.5	67	35	28	18	124	59	53	54	16	0.56	84	1	0	0	0	0	0	0	0	0	0	150.8	60.4	89	103	26.6	1	103	73	13.19	21.8377	1	99.6	0	0	0		5.7	4.5	0.1
139	2	77.0274	5.96	14	218	4.3	0.8	92	24	17	25	107	57	51	40	7	0.73	95	1	1	1	1	1	1	1	1	1	0	155.3	61.6	93	97	25.6	1	134	72	13.48	21.8831	1	131.9	1	0	0		5.4	4.4	0.08
140	2	52.3123	6.59	14.6	190	4	1	60	52	55	27	154	81	105	52	9	0.6	162	1	1	1	1	1	0	0	0	0	0	151.9	63	94	93	27.3	1	117	89	13.79	21.8889	1	136.5	1	0	0		10.5	3.2	0.03
141	2	74.6849	5.38	11.8	183	4.3	1	68	22	28	24	143	66	45	68	16	0.71	73	0	0	1	0	0	0	1	1	1	0	147.4	56.6	86	93.5	26.1	1	145	74	12.39	21.8905	1	114.3	1	0	0		5.9	4.3	0.25
142	2	75.926	7.49	13.5	241	4.5	0.9	68	165	118	101	178	100	124	53	17	1.03	170	0	1	1	1	1	0	1	1	1	0	145.7	53.4	79	90	25.2	1	96	63	11.69	21.8914	1	103.7	1	0	0		7.4	6.9	0.11
143	2	72.9562	6.25	13.6	212	4.2	0.8	47	32	29	19	174	96	118	54	14	0.93	100	0	1	1	0	0	0	0	0	0	0	143.5	56.9	83.5	90	27.4	1	116	77	12.46	21.8981	1	111.8	1	0	0		5.8	6.2	0.02
144	2	55.2301	6.85	13.9	251	4.3	0.8	86	20	32	27	168	92	104	55	13	0.51	185	0	0	0	0	1	0	0	0	0	0	161.3	73.7	85	108	28.3	1	125	79	16.14	21.8996	1	148.8	1	0	1		8.6	3.4	0.41
145	2	41.7918	5.95	12.8	399	4.2	0.5	59	24	21	18	208	120	161	56	8	0.42	94	1	0	0	0	0	0	1	1	0	1	155.7	83.1	102	117	34.3	1	124	85	18.21	21.9134	1	126.6	1	0	0		5.6	4.4	0.4
146	1	24.1397	6.09	15.5	172	4.8	1.4	38	96	207	122	257	144	369	39	13	0.82	92	1	0	0	0	0	1	1	1	0	1	161.9	86.9	106	112	33.1	1	117	81	20.62	23.7284	1	157.9	1	0	0		5.5	10.7	0.25
147	2	56.5178	4.97	13.9	195	4.4	0.8	74	40	62	58	224	127	271	43	11	0.61	102	1	0	0	1	1	1	1	1	1	1	151.4	68.4	98	105	29.8	1	124	76	14.99	21.9152	1	135.5	1	0	0		5.8	4.1	0.03
148	2	36.2164	8.45	12.4	435	4.3	0.4	68	21	18	26	237	146	293	32	7	0.56	106	1	0	0	0	0	1	1	1	1	1	165	92.8	109	112	34.1	1	110	77	20.34	21.9181	1	158	1	1	1		6	5.1	0.39
149	2	73.9918	5.64	13.8	295	4.6	1	70	29	17	13	268	190	175	43	14	0.75	121	1	1	1	0	0	1	1	1	0	1	155.5	62.3	97	99	25.8	1	129	73	13.66	21.9262	1	159.9	1	0	0		7.2	5.3	0.17
150	2	64.1205	4.77	12.3	215	4	0.8	76	26	21	13	268	193	104	54	21	0.9	82	0	0	0	0	0	0	0	0	0	0	144.2	53.9	86	95	25.9	1	100	74	11.82	21.9295	1	75.8	0	0	0		5.8	4.3	0.08
151	2	66.0493	5.98	14.3	242	4.1	1.1	60	51	50	11	219	144	147	46	16	0.56	116	1	1	1	0	0	1	1	1	1	0	153.4	64.7	90	92.5	27.6	1	118	86	14.19	21.932	1	150.2	1	0	0		6.1	6	0.06
152	2	57.2795	6.34	13.9	269	4.2	1.4	71	17	12	18	248	180	100	48	16	0.66	97	0	1	1	0	0	1	0	1	0	0	146.5	59	81	97	27.7	1	128	89	12.94	21.9322	1	105.7	1	0	0		5.4	5.2	0.1
153	2	70.3425	6.15	14.8	302	4.1	1.1	72	22	17	14	179	110	73	54	10	0.61	82	1	0	0	0	0	0	0	0	0	0	149	68.2	100	105	30.7	1	127	81	14.96	21.9355	1	142.7	1	0	1		5.1	4.7	0.1
154	1	18.6438	9.59	16.4	335	4.8	0.7	87	51	112	84	226	149	145	48	13	0.82	80	1	0	1	0	0	0	0	0	0	0	168.5	107	120	121	37.7	1	141	103	25.39	23.729	1	191.9	1	0	0		6	10.1	0.44
155	2	52.8082	7.21	14.9	356	4.3	1	60	34	43	28	207	142	75	50	14	0.58	89	1	0	0	0	0	0	0	0	0	0	139.9	66	94	103	33.7	1	133	80	14.48	21.9394	1	124.8	1	0	0		5.4	5.2	0.08
156	2	53.4548	5.42	14.8	266	4.5	1	53	26	16	23	147	97	47	41	9	0.72	88	1	1	1	0	0	1	0	1	0	0	155.4	75.6	96	107	31.3	1	121	89	16.59	21.9444	1	117.7	1	0	0		5.7	5.5	0.16
157	2	78.011	5.76	12.8	281	4.2	1	87	26	13	5	217	124	76	78	11	0.61	87	1	1	1	0	0	0	0	0	0	0	149.9	67.2	98	103	29.9	1	162	87	14.76	21.9643	1	131.4	1	0	0		5.5	3.3	0.14
158	2	50.2795	8.2	13.1	369	4.6	1.1	78	24	14	15	231	138	71	79	14	0.55	84	0	0	0	0	0	0	0	0	0	0	153.3	56	84	97	23.8	0	123	78	12.31	21.9821	1	128	1	0	1		5.6	4.7	0.17
159	2	72.4082	5.78	13.9	371	4.5	1.2	54	31	33	24	196	129	59	55	13	0.64	95	0	1	1	0	0	0	0	0	0	0	138.5	51.3	84	97	26.7	1	139	76	11.28	21.9883	1	87.1	0	0	0		5.8	5.7	0.03
160	2	43.8658	4.02	13.3	304	4.1	0.7	62	22	22	21	162	90	77	57	11	0.62	109	1	0	0	0	0	0	1	1	1	0	154.4	80.7	102.5	107	34	1	127	81	17.75	21.995	1	126	1	0	1		5.7	4.8	0.05
161	2	83.8274	3.97	13.9	219	4.3	0.7	47	25	22	19	198	120	153	47	7	0.69	94	0	0	1	0	0	1	1	1	0	1	147.8	48.6	87	90	22.2	0	151	60	10.69	21.9959	1	104.1	1	0	0		5.5	6.9	0.1
162	2	70.1945	5.57	13.4	240	4	1.2	88	52	42	19	179	117	58	50	13	0.62	94	1	0	0	0	0	0	1	1	1	0	150	73.6	92	108	32.7	1	135	83	16.19	21.9973	1	176.3	1	0	0		6.2	5.9	0.13
163	2	17.3781	11.55	12	385	3.9	0.5	42	18	17	13	156	80	92	58	8	0.59	71	1	0	0	0	0	0	0	0	0	0	162.3	95	97	117	36.1	1	108	83	20.9	22	1	135.1	1	0	0		5.1	4.3	0.11
164	2	69.8301	5.94	14.4	385	4.7	2.2	67	36	25	36	169	104	59	53	12	0.7	96	0	1	1	0	0	0	1	1	1	0	153.4	55.9	87	92	23.8	0	66	44	12.3	22.0036	1	125.6	1	0	0		5.9	5.8	0.06
165	2	66.074	6.45	15.2	263	4.3	1.1	58	20	18	10	227	159	98	48	16	0.63	101	0	1	1	0	0	1	0	1	0	0	150.3	59.8	82	88	26.5	1	125	84	13.16	22.0067	1	104.1	1	0	1		5.8	4.4	0.14
166	2	50.4164	9.59	15.9	361	4.2	0.8	98	43	47	48	270	177	136	66	10	0.68	121	1	0	1	0	0	0	1	1	1	0	163	87.9	109	108.5	33.1	1	146	110	19.35	22.0137	1	191	1	0	1		6.6	4.9	0.91
167	2	47.7123	5.33	14.5	241	4.5	1.3	100	31	35	96	245	150	98	75	9	0.75	102	1	0	0	0	0	0	0	0	0	0	162.1	83.4	106	111.5	31.7	1	122	80	18.36	22.0144	1	167.5	1	0	1		5.4	5.4	0.09
168	2	30.5589	6.78	14.7	402	4.6	0.6	71	23	42	44	188	116	118	48	7	0.6	91	1	0	1	0	0	1	0	1	0	0	164.9	88.7	107	107	32.6	1	140	109	19.53	22.018	1	150.4	1	0	0		5.7	5.5	0.34
169	2	54.9589	6.39	16.3	237	4.5	0.8	89	30	32	17	135	66	96	50	14	0.54	132	1	1	1	1	1	0	1	1	1	0	153.5	90.9	116	117.5	38.6	1	130	87	20.02	22.0242	1	153.9	1	1	1		6.4	5.6	0.25
170	2	72.7973	5.69	12.4	228	4.2	0.8	88	23	25	16	163	84	83	62	14	0.87	104	0	1	1	0	0	0	1	1	1	0	153.2	57.8	86	91	24.7	0	125	74	12.73	22.0242	1	118.1	1	0	0		6	4.7	0.02
171	2	57.4384	6.29	13.8	303	4.1	0.6	79	24	21	11	210	122	136	61	10	0.55	90	1	1	1	0	0	0	0	0	0	0	159	80.4	102	115	31.8	1	142	95	17.71	22.0274	1	169.1	1	0	0		5.4	4.3	0.11
172	2	57.726	7.69	14.5	199	4.4	1.1	80	24	24	13	156	88	57	57	6	0.67	96	1	0	1	0	0	0	0	0	0	0	156	68.5	92	98	28.1	1	142	97	15.09	22.0292	1	180.1	1	0	0		5.4	3.9	0.75
173	2	36.1178	6.19	13.6	383	4.5	0.7	89	30	33	22	243	172	138	43	7	0.61	99	1	0	1	0	0	1	0	1	0	0	159.2	94	108	109.5	37.1	1	145	81	20.72	22.0426	1	188	1	0	1		5.5	6.5	0.43
174	2	75.0932	5.16	13.9	236	4.6	1.1	109	26	16	10	190	117	176	38	16	0.66	119	0	1	1	0	0	1	1	1	0	1	145.4	51.3	87	92	22	0	137	82	11.32	22.0663	1	98.8	0	0	0		6	3.2	0.07
175	2	60.3288	4.54	13.4	215	4.4	0.8	54	47	53	34	225	148	176	42	13	0.76	85	1	0	0	0	0	1	1	1	0	1	151.5	81.7	110	112	35.6	1	118	80	18.03	22.0685	1	224.9	1	0	1		5.3	6.7	0.27
176	2	73.7644	5.03	14.2	238	3.6	0.9	69	23	20	16	202	114	91	70	15	0.51	110	0	0	0	0	0	0	0	0	0	0	146.6	38.9	77	85	18.1	0	115	62	8.59	22.0823	1	64.3	0	0	0		5.6	3.7	0.03
177	2	67.7781	5.61	14.3	249	4.3	1.2	85	21	24	13	226	151	143	46	12	0.68	94	0	1	1	0	0	1	1	1	1	0	155.2	69.8	82	102	29.1	1	133	95	15.4203	22.0922	1	177.877	1	0	0		6	4.9	0.04
178	2	59.9726	4.38	13.8	229	4.2	1.1	95	31	45	83	160	82	78	62	12	0.68	96	1	1	1	0	0	0	1	1	1	0	148	71.4	96	109	32.6	1	124	73	15.79	22.1148	1	111.7	1	0	0		5.6	2	0.29
179	2	47.6795	5.06	13.8	292	4.2	1.8	69	25	25	21	320	232	168	54	8	0.67	120	1	0	0	0	0	0	1	1	0	1	152.7	69.9	102	100	30	1	118	74	15.46	22.1173	1	85.6	0	0	0		6.9	6.1	0.54
180	2	77.6384	6.61	12.6	308	4.6	0.8	74	19	15	9	139	75	139	36	32	1.04	199	1	1	1	1	1	1	1	1	1	0	149.7	60	91	96	26.8	1	129	58	13.28	22.1333	1	141.1	1	0	0		9.6	5.6	0.2
181	2	29.3288	7.22	12.9	266	4.5	0.6	59	20	15	10	222	134	134	61	11	0.65	81	0	0	0	0	0	0	0	0	0	0	156.5	71.3	85	109	29.1	1	121	85	15.79	22.1459	1	126.9	1	0	1		5.3	4	0.56
182	2	64.1096	5.7	12.6	306	4	0.6	74	48	52	55	167	98	129	43	9	0.7	80	0	1	1	0	0	1	1	1	1	0	150	61.2	80	94	27.2	1	109	78	13.57	22.1732	1	127.5	1	0	0		5.6	4.6	0.27
183	2	56.9452	4.76	13.7	278	4.3	1.1	98	26	17	181	269	148	363	48	8	0.65	84	1	0	0	0	0	1	1	1	0	1	156	62.1	89	97	25.5	1	112	74	13.79	22.2061	1	149.4	1	0	0	9.6	5.6	5	0.33
184	2	61.6301	6.01	14.6	272	4.2	1.1	94	23	31	33	198	115	103	62	25	0.73	113	1	0	0	0	0	0	0	0	0	0	147.5	55.3	91.5	96	25.6	1	105	69	12.28	22.2061	1	137.5	1	0	0		7.1	4.5	0.13
185	2	67.0329	3.71	13.1	293	3.9	1.2	76	24	21	12	129	58	61	59	11	0.66	99	1	1	1	0	0	0	0	0	0	0	158.2	76	101	104	30.4	1	128	82	16.88	22.2105	1	203	1	0	0		5	4.8	0.3
186	2	41.7616	5.25	14	329	4.6	1.1	75	17	15	14	239	157	93	63	9	0.69	96	1	0	1	0	0	0	0	0	0	0	158	77.2	94	109	30.9	1	112	90	17.15	22.215	1	154.2	1	0	1		5.5	5.1	0.3
187	2	30.1452	7.75	13.2	253	4.2	0.7	82	17	9	18	172	81	147	62	10	0.75	92	1	0	0	0	0	0	0	0	0	0	158	74.6	105	108	29.9	1	98	69	16.58	22.2252	1	122.5	1	0	0	25.3	5.6	3.3	0.15
188	2	40.0658	6.59	11.4	388	4.3	1	76	20	15	13	184	128	73	41	7	0.74	95	1	0	0	0	0	1	0	1	0	0	155.2	75.2	99	102	31.3	1	119	81	16.72	22.234	1	145.6	1	0	1		5.7	4.7	0.09
189	2	52.2247	5.32	13.5	346	4.4	1.7	76	23	19	14	253	198	51	45	12	0.54	86	0	0	0	0	0	1	1	1	1	0	150.9	54.3	80	98	23.8	0	103	76	12.09	22.2652	1	79.2	0	0	0		5.4	5	0.18
190	2	68.0575	7.33	12.9	292	4.5	0.7	65	20	24	44	241	149	92	74	17	0.73	105	0	1	1	1	1	0	0	0	0	0	158.5	56	74	93	22.4	0	138	91	12.47	22.2679	1	139	1	0	0		5.9	3.6	0.03
191	2	58.5397	7.18	14.2	236	4.4	0.9	93	41	59	30	142	87	68	41	12	0.57	110	1	1	1	0	0	1	0	1	0	0	157.5	88.9	106	109	35.8	1	127	86	19.8	22.2722	1	161.7	1	0	0		6.2	4.3	0.82
192	2	74.9178	5.12	13.3	264	4.5	1.4	71	31	22	14	201	115	80	70	16	1	90	0	1	1	0	0	0	0	0	0	0	158.8	68.2	84.5	97.5	27	1	119	76	15.19	22.2727	1	134.2	1	0	0		5.9	6.7	0.06
193	2	56.9288	6.79	14.8	280	4.6	1.5	138	39	50	72	227	158	80	53	25	0.85	80	0	0	0	0	0	0	0	0	0	0	153.8	67.4	87	98	28.5	1	113	81	15.02	22.2849	1	147.3	1	0	0		5.6	5	0.15
194	2	79.8082	5.35	13.4	234	4.3	0.8	93	23	18	27	210	138	50	62	17	0.6	90	1	0	0	0	0	0	0	0	0	0	149.9	58.2	90	96	25.9	1	128	80	12.97	22.2852	1	108.7	1	0	0		5.3	3.9	0.28
195	2	51.9151	5.41	13.9	329	4.3	0.8	53	22	19	12	230	151	60	67	10	0.84	87	0	0	0	0	0	0	0	0	0	0	154.6	52.9	77	89.5	22.1	0	98	81	11.79	22.2873	1	75.1	0	0	0		5.6	5.5	0.1
196	2	75.1726	5.37	12.3	201	4.6	1.2	45	23	19	13	254	188	73	51	17	0.66	118	0	0	1	0	0	0	0	0	0	0	148.7	52	82.5	91.5	23.5	0	167	55	11.59	22.2885	1	92.5	0	0	1		5.6	4.8	0.03
197	2	85.3644	7.31	12.1	307	3.9	0.4	103	29	13	7	145	82	116	40	12	0.59	85	0	0	0	0	0	1	0	1	0	0	150	48.5	87	94	21.6	0	116	76	10.81	22.2887	1	64.7	0	0	0		5.5	3.8	0.43
198	2	67.8164	5.46	13	255	4.1	0.8	57	21	13	12	247	175	52	62	9	0.59	111	1	1	1	1	1	0	0	0	0	0	151.7	68	99	99	29.5	1	125	74	15.16	22.2941	1	149.3	1	0	0		6.6	4.5	0.39
199	2	82.2219	5.99	12.3	200	4.1	0.6	48	19	11	14	229	145	151	54	16	0.58	93	0	1	1	0	0	0	1	1	1	1	143.5	42.1	71	84	20.4	0	114	71	9.39	22.304	1	87.2	0	1	0		5.6	4	0.09
200	2	45.726	4.19	14.3	323	4.2	0.6	112	31	41	78	223	146	76	62	12	0.69	89	1	0	0	0	0	0	1	1	1	0	150.3	66.8	90	101	29.6	1	124	84	14.9	22.3054	1	138.5	1	0	0	3.2	5.4	6.5	0.47
201	2	53.4767	4.58	12.7	285	4.1	0.9	68	22	22	12	223	143	112	58	14	0.72	89	0	0	0	0	0	0	0	0	0	0	153.3	70.5	86	106	30	1	116	85	15.73	22.3121	1	131.1	1	0	0		5.2	4.4	0.09
202	2	50.8904	5.1	12.8	291	4.4	0.9	82	24	34	34	257	154	248	53	13	0.72	74	0	0	0	0	0	0	1	1	0	1	150	64.8	86	102	28.8	1	124	88	14.46	22.3148	1	78.8	0	0	0		5.5	4.2	0.09
203	2	50.8356	5.01	15.1	281	4.7	1.4	114	55	47	73	210	107	294	44	12	0.76	109	1	0	1	0	0	1	1	1	0	1	151.8	70.3	90	100	30.4	1	138	91	15.69	22.3186	1	148.9	1	0	0		5.1	8	0.13
204	2	32.1151	7.69	13.8	340	4.4	0.6	102	16	15	11	199	105	61	82	9	0.47	91	0	0	0	0	0	0	0	0	0	0	153.8	72.9	84	105	30.8	1	109	74	16.29	22.3457	1	125.6	1	0	0		5.4	4.7	0.08
205	2	28.1726	9.62	13.4	311	4.2	1.6	69	20	24	21	162	97	78	49	8	0.65	88	1	0	1	0	0	1	0	1	0	0	169	95.4	92	109	33.9	1	138	96	21.32	22.348	1	162.9	1	0	0		6	6.2	0.4
206	2	42.011	5.38	14.5	249	4.4	0.9	78	64	94	71	205	108	127	72	9	0.57	99	1	0	0	0	0	0	0	0	0	0	161.7	85.9	109	116	32.9	1	127	80	19.21	22.3632	1	177.4	1	0	1		5.5	4.5	0.11
207	2	78.5233	5.97	14.7	113	3.3	2.9	165	107	63	102	155	88	103	46	8	0.52	92	1	0	1	0	0	1	0	1	0	0	148.4	62.1	97	100	28.2	1	179	94	13.89	22.3671	1	94.9	0	0	0		5.2	4.1	0.22
208	2	64.4027	3.72	13	296	4.4	1.3	86	27	18	15	214	152	52	52	17	0.79	90	0	0	0	0	0	0	1	1	1	0	152.6	55.2	81	93	23.7	0	85	67	12.35	22.3732	1	95.1	0	0	0		5.4	4.4	0.06
209	2	65.011	3.76	12.5	270	4	0.7	54	25	16	16	208	142	105	45	12	0.56	82	0	0	0	0	0	1	0	1	0	0	140	42.5	75	83	21.7	0	91	57	9.51	22.3765	1	90.7	0	1	0	7.8	5.5	4.2	1
210	2	67.1589	3.78	12.3	253	4.5	0.6	55	48	30	12	161	88	70	59	12	0.76	95	1	1	1	0	0	0	1	1	1	0	154.4	78.8	111	112	33.1	1	133	78	17.64	22.3858	1	118.8	1	0	0		5.8	7.5	0.02
211	2	65.8329	5.13	12	313	4	0.5	65	21	8	13	221	155	82	50	12	0.73	105	0	1	1	0	0	0	0	0	0	0	141.5	49.4	82.5	89.5	24.5	0	120	87	11.06	22.3887	1	96.6	0	0	0		5.8	4.5	0.13
212	2	77.7616	7.83	13.3	223	4.3	0.8	81	41	28	26	190	114	100	56	15	0.59	77	1	1	1	0	0	0	0	0	0	0	142.1	64.8	106	105	32.1	1	135	79	14.51	22.392	1	158.3	1	0	0		5.4	5.5	0.22
213	2	30.1342	5.52	14	314	4.7	0.9	39	18	10	20	194	103	130	65	9	0.55	98	0	0	0	0	0	0	0	0	0	0	154.2	56.5	75	96	23.8	0	111	82	12.66	22.4071	1	73	0	0	1		5.3	4.5	0.05
214	2	56.2438	3.57	15	208	4.5	2.1	66	38	32	47	213	137	91	58	8	0.54	111	0	0	1	0	0	0	0	0	0	0	146.5	52.5	75	90	24.5	0	130	92	11.77	22.419	1	93.5	0	0	0		6	4.7	0.08
215	2	60.1315	4.11	13.2	300	4.2	0.9	119	42	47	96	259	175	90	66	7	0.57	96	1	0	0	0	0	0	0	0	0	0	153.5	59.4	93	100	25.2	1	104	76	13.32	22.4242	1	110.2	1	0	0		5.6	4.9	0.2
216	2	39.5699	6.47	13.3	275	4.2	0.6	67	29	35	16	201	122	130	53	11	0.61	87	1	0	0	0	0	0	0	0	0	0	158.4	68	88	105	27.2	1	103	71	15.25	22.4265	1	106.6	1	0	1		5.3	5.6	0.13
217	2	38.4219	7.84	14.4	285	4.6	0.8	73	39	75	36	204	134	110	48	9	0.63	131	1	0	1	0	1	1	0	1	0	0	156.5	69.1	95	96.5	28	1	165	119	15.5	22.4313	1	105.9	1	0	1		6.3	4.8	0.17
218	2	66.5479	7.79	15.2	245	4.6	0.8	102	32	27	23	182	124	57	47	20	0.65	107	1	0	0	0	0	1	0	1	0	0	157.9	69.5	89	99	27.6	1	124	85	15.59	22.4317	1	142	1	0	0		6	5.7	0.24
219	1	33.463	8.11	15.4	255	4.4	1	84	51	103	32	211	147	130	38	13	0.74	101	1	0	0	0	0	1	0	1	0	0	178.1	131.9	130	125	41.6	1	133	89	31.31	23.7377	1	236.4	1	0	0		6.2	7.4	0.39
220	2	58.2822	7.41	13.5	224	4.3	0.7	45	20	20	13	174	90	103	63	16	0.68	86	0	0	0	0	0	0	1	1	1	0	156.9	66.2	81	103	26.9	1	117	76	14.85	22.432	1	136.1	1	0	0		6.3	4.1	0.08
221	1	54.5014	6.27	16.6	206	4.3	1.3	57	23	27	51	208		540	39	11	0.73	141	1	1	1	0	1	1	1	1	1	1	165.8	94	118	109	34.1	1	149	95	22.36	23.7872	1	241	1	1	1		6.6	5.1	0.27
222	2	36.263	9.96	15	302	4.6	0.7	66	19	20	18	228	142	148	56	12	0.63	96	1	0	0	0	0	0	0	0	0	0	165.7	69.9	93	106	25.5	1	132	84	15.68	22.432	1	119.8	1	0	0		5.1	5.1	0.63
223	2	75.6247	6.96	13.2	283	4.3	0.9	83	23	12	11	234	149	124	60	12	0.75	100	0	0	0	0	0	0	0	0	0	0	142.8	48.1	74	92.5	23.6	0	107	78	10.79	22.4324	1	82.6	0	0	0		5.5	4.5	0.02
224	2	82.6685	7.26	13.8	259	4.4	0.6	95	27	18	11	220	151	82	53	21	0.9	85	0	1	1	0	0	0	1	1	1	0	142.6	45.2	85	84.5	22.2	0	121	71	10.14	22.4336	1	74.2	0	0	0		5.5	4.9	0.05
225	2	36.4822	6.11	13.8	461	4.5	0.7	89	45	67	21	223	158	95	46	8	0.63	88	1	0	0	0	0	1	0	1	0	0	156.5	73.1	104	97	29.8	1	122	84	16.4	22.435	1	119.7	1	0	0		5.9	5.4	0.15
226	2	37.9589	7.27	14.3	310	4.2	0.7	43	24	30	10	200	133	89	49	11	0.65	88	1	0	1	0	0	1	0	1	0	0	156.5	78.7	97	112.5	31.9	1	127	92	17.66	22.4396	1	139.8	1	0	0		5.8	4.9	0.11
227	2	80.0986	7.32	13.3	226	4.3	0.7	50	24	16	14	262	185	124	52	21	0.65	118	0	0	1	0	0	0	0	0	0	0	152.2	50.4	86	93	21.8	0	147	79	11.31	22.4405	1	117	1	0	0		6	3.1	0.2
228	2	42.7123	5.68	14	272	4.5	0.9	82	18	15	9	222	137	157	54	13	0.69	94	0	0	0	0	0	0	1	1	0	1	153.4	60.5	82	92	25.8	1	103	81	13.58	22.4463	1	119.3	1	0	0		5.2	3.7	0.08
229	2	59.1507	6.12	13.6	350	4.5	1.1	91	34	41	126	257	170	64	74	10	0.69	105	0	0	0	0	0	0	1	1	1	0	136.8	42.3	70	82	22.5	0	116	86	9.5	22.4586	1	82.7	0	0	1		5.8	4.4	0.02
230	2	52.5671	6.32	13.7	387	4.2	1	69	35	15	101	212	104	244	59	12	0.64	120	1	0	1	0	0	0	1	1	0	1	156.8	66.6	88	101	27.1	1	139	98	14.96	22.4625	1	122.2	1	1	1		5.9	5.7	0.25
231	2	69.1068	5.77	14	180	4.4	0.9	89	32	44	29	92	39	64	40	19	0.55	127	1	1	1	1	1	1	1	1	1	0	145.1	55.9	89.5	88	26.6	1	119	72	12.56	22.4687	1	157.4	1	0	0		6.8	3.8	0.19
232	2	81.1096	4.6	13.6	243	4.2	0.7	65	25	19	15	229	137	111	70	22	0.72	89	1	0	0	0	0	0	0	0	0	0	147.6	61.9	99	96	28.3	1	125	69	13.91	22.4717	1	92.8	0	0	0		5.8	4.9	0.08
233	2	69.0082	10.54	13.4	369	4.3	0.6	107	31	32	26	164	85	144	50	16	0.78	99	1	1	1	1	1	0	1	1	1	0	147.1	59.4	92	94	27.5	1	143	79	13.35	22.4747	1	113.1	1	0	0		6.2	4.4	0.18
234	2	56.8027	4.46	14	296	4.2	1	72	67	62	74	222	150	151	42	10	0.59	96	0	0	0	0	0	1	1	1	0	1	151	62.8	80	98	27.5	1	119	77	14.12	22.4841	1	96.4	0	0	0		5.7	4.6	0.04
235	2	67.4685	5.38	14.2	232	4.3	0.8	76	20	15	12	195	125	126	45	14	0.52	112	1	0	0	0	0	1	0	1	0	0	152.9	65.2	100	100	27.9	1	137	87	14.66	22.4847	1	115.4	1	0	0	12.4	5.4	4.5	0.48
236	2	28.2411	6.5	13.6	422	4.6	0.6	57	15	9	15	247	166	134	54	10	0.68	96	1	0	0	0	0	0	0	0	0	0	159	66.8	95	104	26.4	1	107	76	15.02	22.485	1	107.7	1	0	1		5.4	5.8	0.7
237	2	59.2	5.36	13.1	351	4.3	1	60	62	25	51	163	83	113	57	12	0.59	199	1	1	1	1	1	0	1	1	1	0	155	90.7	112	115	37.8	1	148	90	20.4	22.4917	1	215.5	1	0	0		7.6	5.9	0.38
238	2	78.2685	6.85	12.5	282	4.2	0.8	94	27	25	16	127	66	102	41	11	0.73	121	1	1	1	1	1	1	1	1	1	0	147.5	50.1	93	94	23	0	123	63	11.27	22.495	1	96.6	0	0	0		8.9	5.6	0.27
239	2	64.6575	8.86	14.5	235	4	0.4	63	18	16	20	173	94	163	46	18	0.63	85	1	0	0	0	0	1	1	1	0	1	166	91.9	100	115	33.4	1	124	78	20.69	22.5136	1	235	1	0	0		5.5	4.9	0.29
240	1	61.0164	5.78	13.8	225	4.3	0.6	57	37	36	45	129	62	124	42	10	0.61	110	0	1	1	1	1	0	1	1	1	0	156.8	64.7	90	94	26.3	1	105	64	15.41	23.8176	1	362.9	1	0	0		7.2	5.3	0.04
241	2	67.737	8.13	15.7	274	4.6	1.5	104	50	72	58	180	97	120	59	8	0.53	91	0	1	1	0	0	0	1	1	1	0	149.6	56	85	97	25	1	114	88	12.61	22.5179	1	104	1	0	0		5.6	5.1	0.59
242	1	61.1726	8.11	16.5	285	4.6	0.8	82	30	29	46	149	73	47	67	12	0.62	84	0	1	1	0	0	0	0	0	0	0	148.2	51.2	82	87	23.3	0	146	90	12.3	24.0234	1	83.2	0	1	0		5.6	3.5	0.02
243	2	80.2767	9.61	13.5	270	4.1	1.3	76	22	15	13	117	70	92	29	15	0.93	116	1	1	1	1	1	1	1	1	1	0	145.4	52.9	90	92	25	1	124	67	11.92	22.5331	1	224.8	1	0	0		6.4	6.1	1.89
244	2	27.0055	4.89	13	353	4	1	61	18	10	15	169	85	49	74	11	0.57	83	1	0	0	0	0	0	0	0	0	0	160.4	67.1	95	98	26.1	1	128	88	15.12	22.5335	1	117.6	1	1	1		5.1	4.7	0.36
245	2	59.1945	7.11	14.5	388	4.6	0.5	73	24	25	15	221	135	152	56	12	0.65	110	0	1	1	0	0	0	1	1	1	1	155.9	59.7	81	94	24.6	0	117	79	13.46	22.5461	1	110.1	1	0	0		5.6	4.2	0.18
246	1	24.3973	5.72	16.4	249	4.7	1.3	78	41	67	33	223	144	149	49	13	0.78	92	1	0	1	0	0	0	0	0	0	0	176.7	109.7	118	114	35.1	1	139	101	26.54	24.1933	1	227.9	1	0	1		5.6	8	0.27
247	2	75.1562	5.61	12.6	237	4.2	1.2	73	22	14	15	224	151	133	46	12	0.75	90	1	1	1	0	0	1	0	1	0	0	150.1	57.5	96	94	25.5	1	136	86	12.97	22.5565	1	131.6	1	0	0		5.8	5.8	0.06
248	2	57.1781	5.41	14.5	334	4.6	0.6	91	31	22	13	222	112	60	98	8	0.7	105	0	0	0	0	0	0	1	1	1	0	149	55.1	85	90	24.8	0	114	87	12.43	22.559	1	120.8	1	0	1		6.1	5	0.04
249	2	30.3534	7.6	13.8	358	4.7	0.9	51	17	13	24	224	143	66	68	8	0.56	98	0	0	0	0	0	0	0	0	0	0	152	53.8	75	97	23.3	0	117	80	12.14	22.5651	1	98.2	0	0	1		5.2	5.2	0.06
250	2	69.6849	9.29	14	207	4.6	1	83	19	16	11	223	146	93	58	17	0.72	109	0	1	1	0	0	0	0	0	0	0	156.3	61.9	86	96.5	25.3	1	119	74	13.97	22.5687	1	149.2	1	0	0		5.7	7.3	0.25
251	2	83.0055	6.08	13.5	285	4.1	1.1	71	23	17	10	198	120	59	66	14	0.68	83	0	1	1	0	0	0	1	1	1	0	142	47.8	76	86	23.7	0	129	79	10.8	22.5941	1	87.6	0	0	0		5.9	3	0.03
252	2	54.2247	4.93	13.1	266	4.2	0.5	57	25	20	21	189	117	83	55	11	0.74	99	1	1	1	0	0	0	0	0	0	0	156.8	70.9	96	103	28.8	1	128	90	16.03	22.6093	1	92	0	0	1		5.4	4.1	0.1
253	2	65.3616	4.72	14.4	271	4.1	0.9	51	38	29	17	328	248	86	63	10	0.72	95	0	0	0	0	0	0	0	0	0	0	152.6	49.4	87	90	21.2	0	104	80	11.17	22.6113	1	81.2	0	0	0		5.7	4.1	0.14
254	2	66.0932	4.9	14.9	214	4.1	0.7	59	22	27	17	203	139	86	47	15	0.68	180	1	1	1	0	1	1	0	1	0	0	155.6	73.5	102	104	30.4	1	127	75	16.62	22.6122	1	170.7	1	0	0		8.8	3.9	0.16
255	2	70.2466	4.48	14	268	4.4	0.9	70	16	9	10	233	167	95	47	15	0.68	142	1	1	1	0	1	1	0	1	0	0	150.7	59.3	90	91	26	1	136	64	13.41	22.6138	1	109	1	0	0		6.9	3	0.02
256	2	87.0849	6.86	13.3	239	4.2	0.8	104	20	16	16	199	109	251	40	19	0.58	119	1	1	1	0	0	1	1	1	0	1	149	64.4	90	99	29	1	141	77	14.57	22.6242	1	127.2	1	0	0		6.6	4.5	0.05
257	2	50.9068	6.65	13.2	236	4	1.2	75	23	19	20	201	122	102	59	9	0.78	93	0	0	0	0	0	0	0	0	0	0	151.8	58.1	87.5	96	25.1	1	87	58	13.15	22.6334	1	99.9	0	0	0		5.9	6.3	0.41
258	2	76.6438	3.24	11.9	302	4.2	0.9	76	19	11	17	185	113	161	40	18	0.66	94	0	1	1	0	0	1	1	1	0	1	149.6	57.7	86	99	25.8	1	141	74	13.06	22.6343	1	107.2	1	0	0		5.5	4.3	0.02
259	2	62.8466	5.44	15.1	248	4.5	1.2	97	24	24	11	270	189	148	51	13	0.6	99	1	0	0	0	0	0	0	0	0	0	151	62.6	88	99	27.5	1	119	80	14.17	22.6358	1	125.6	1	0	0		5.6	5.6	0.2
260	2	73.463	5.68	13.2	212	4.1	0.8	50	35	45	25	234	145	55	78	15	0.63	122	0	1	1	1	1	0	0	0	0	0	148.3	41.3	73	86	18.8	0	148	74	9.35	22.6392	1	82.3	0	0	0		6.3	6.7	0.03
261	2	59.5507	5.28	14.4	252	4.4	1.5	89	19	18	10	250	165	34	78	14	0.63	98	0	0	0	0	0	0	0	0	0	0	152	58.2	85	100	25.2	1	115	75	13.18	22.646	1	105.7	1	0	1		5.7	5.4	0.02
262	2	53.6658	9.69	12.3	293	4.4	0.4	82	34	23	233	246		449	51	10	0.56	104	0	1	1	0	0	0	1	1	1	1	155.2	54.7	84	86.5	22.8	0	135	92	12.39	22.6508	1	96	0	0	0		5.2	5	0.31
263	2	65.9863	7.72	14.5	303	4.2	0.8	58	24	31	17	200	115	141	57	10	0.58	74	0	1	1	0	0	0	1	1	1	0	153.8	55.8	82	93.5	23.6	0	108	68	12.64	22.6523	1	99	0	0	0		5.6	4.1	0.61
264	2	79.3699	7.1	14.9	234	4.2	0.7	89	42	35	34	209	143	120	42	15	0.89	84	0	0	0	0	0	1	0	1	0	0	145.9	51	81	89	23.9	0	122	68	11.56	22.6667	1	118.4	1	0	0		5.8	6.3	0.11
265	2	63.4548	5.44	13.6	275	4	0.6	55	19	18	25	225	153	86	55	14	0.83	92	1	0	0	0	0	0	0	0	0	0	158.8	67.5	93	99.5	26.8	1	128	80	15.3	22.6667	1	155.5	1	0	0		5.2	4.2	0.13
266	2	60.8055	6.72	14.5	267	4.4	1.1	92	27	21	18	185	94	78	75	10	0.59	121	1	0	0	0	0	0	0	0	0	0	158.1	80.6	102	109	32.2	1	133	70	18.27	22.6675	1	186	1	0	0		6.3	5.4	0.32
267	2	39.6658	5.93	12.4	236	4.3	0.7	80	14	5	9	209	122	48	77	9	0.44	74	1	0	0	0	0	0	0	0	0	0	157.5	58.7	90	100	23.7	0	107	78	13.31	22.6746	1	100.5	1	0	1		4.9	3.8	0.07
268	2	39.5041	4.23	13.2	309	4.1	1.4	56	17	14	14	175	107	60	56	8	0.5	105	1	0	0	0	0	0	0	0	0	0	171.5	115.5	118	130	39.3	1	130	83	26.19	22.6753	1	267.9	1	0	0	25.1	5.6	4.6	0.24
269	2	45.2411	8.9	14.2	338	4.6	0.8	58	15	15	37	202	117	174	50	16	0.73	93	0	0	0	0	0	0	1	1	0	1	152.9	64.2	85	99	27.4	1	120	89	14.56	22.6791	1	132.8	1	0	0		5.5	4.8	0.55
270	2	75.6438	5.68	12.7	270	4.8	2.7	73	28	24	20	143	65	105	57	12	0.66	92	1	1	1	0	0	0	1	1	1	0	149.1	58.6	93.5	96	26.4	1	155	89	13.3	22.6962	1	122.9	1	0	0		4.7	4.7	0.06
271	2	71.7534	5.75	12.8	251	4.1	1	51	39	33	14	221	127	43	85	15	0.52	66	0	1	1	0	0	0	1	1	1	0	150.7	48.2	77	93	21.2	0	93	53	10.94	22.6971	1	96.7	0	0	0		6.1	3.4	0.07
272	2	70.2767	4.58	13.2	270	4.4	0.8	94	26	20	15	231	160	45	62	14	0.65	104	1	0	0	0	0	0	0	0	0	0	149.5	56.7	90	93	25.4	1	137	71	12.87	22.6984	1	94.4	0	0	0		5.3	4.5	0.06
273	2	72.3315	5.67	11.4	267	4	0.6	98	19	11	14	201	139	90	44	22	0.84	98	0	1	1	0	0	1	0	1	0	0	140.7	48.7	87	89	24.5	0	103	66	11.06	22.7105	1	84.3	0	0	0		6.2	4.9	1.08
274	2	77.0301	6.53	14.3	235	4.6	1.1	68	39	39	20	165	85	187	43	14	0.72	117	0	1	1	0	0	1	1	1	1	1	148.3	52.7	87	93	24	0	123	72	11.97	22.7135	1	110	1	0	0		6	6.1	0.09
275	2	43.189	9.25	14.7	303	4.5	1	52	22	25	26	173	92	101	61	12	0.77	87	1	0	0	0	0	0	0	0	0	0	163	82.5	100	101.5	31.1	1	122	86	18.74	22.7152	1	218.7	1	0	0		5.5	5.8	0.14
276	2	75.5644	8.39	12.1	298	4.6	0.9	107	25	16	13	182	124	59	46	20	0.88	104	1	1	1	0	0	1	1	1	1	0	148.6	67	92	96	30.2	1	155	80	15.22	22.7164	1	124.7	1	0	0		6.6	8.1	0.29
277	2	61.6521	5.82	12.7	330	4.1	0.6	68	27	19	24	232	122	136	83	13	0.7	129	0	0	0	0	1	0	0	0	0	0	147.5	58.5	83	94	26.9	1	111	72	13.29	22.7179	1	112.8	1	0	1		6.8	5.2	0.09
278	2	60.0411	5.04	13.5	261	4.5	0.9	88	17	21	17	160	89	116	48	11	0.62	91	1	1	1	1	1	1	1	1	1	0	149.4	72.2	102	106	32.3	1	123	74	16.42	22.7424	1	145.9	1	0	0	22.6	6.1	4.4	0.1
279	2	66.0247	6.11	13.1	367	4	0.9	105	24	19	18	175	91	83	67	15	0.65	98	1	1	1	0	0	0	1	1	1	0	151.1	59.2	90	100	25.9	1	140	84	13.47	22.7534	1	124.8	1	0	0		5.7	4.2	0.06
280	2	75.5671	4.78	13.3	164	4.3	0.6	78	15	10	15	163	70	307	32	11	0.53	101	1	1	1	0	0	1	1	1	0	1	145.5	58.8	96	95	27.8	1	159	79	13.38	22.7551	1	104.1	1	0	0		5.7	3.6	0.23
281	2	66.9151	5.8	13.6	247	4.3	1.2	91	53	51	34	237	167	95	51	15	0.54	89	0	0	0	0	0	0	1	1	1	0	146.8	54.9	74	92	25.5	1	108	77	12.5	22.7687	1	104.3	1	0	0		5.7	7	0.04
282	2	57.274	7.96	14.4	463	4.3	0.8	102	37	33	24	210	115	126	70	11	0.64	91	0	1	1	0	0	0	0	0	0	0	153	63.1	87	94.5	27	1	119	70	14.37	22.7734	1	128.7	1	0	0		5.8	4.7	0.1
283	2	35.789	7.05	13.4	359	4.5	0.9	65	23	22	18	202	135	104	46	10	0.86	96	1	0	0	0	0	1	0	1	0	0	165.1	100.8	112.5	118	37	1	129	86	22.96	22.7778	1	223.8	1	0	0		5.5	4.4	1.61
284	2	67.211	5.12	14.7	322	4.2	0.7	72	25	18	11	180	103	81	61	11	0.73	99	0	0	1	0	0	0	1	1	1	0	149.5	48.1	79	87	21.4	0	134	102	10.96	22.7859	1	133	1	0	0		5.4	4.9	0.02
285	2	37.5205	4.24	11.1	229	4.1	1.2	41	18	20	13	176	98	102	58	10	0.65	92	1	1	1	0	0	0	0	0	0	0	160.9	82.7	100	112	31.9	1	135	95	18.85	22.7932	1	150.9	1	0	0		5.4	4.2	0.13
286	1	29.8685	10.64	17.4	250	4.7	1.1	79	37	68	44	204	126	221	34	7	0.91	88	1	0	1	0	0	1	1	1	0	1	176.1	133.1	124	127	43	1	149	86	32.25	24.2299	1	209.4	1	1	0	40.7	5.5	7.2	0.84
287	1	81.5945	7.34	16.5	205	4.5	2.3	92	33	39	33	209	123	126	61	17	0.8	79	0	1	1	0	0	0	0	0	0	0	156	60.6	95	96	24.9	0	134	87	14.71	24.2739	1	135.2	1	0	1		5.8	7.5	0.05
288	1	77.1014	4.75	14.8	199	4.2	0.7	67	22	20	16	176	93	65	70	20	0.88	146	0	1	1	1	1	0	1	1	1	0	156.8	67.2	92	96	27.3	1	163	75	16.32	24.2857	1	124.6	1	0	0		7.5	3.5	0.05
289	2	42.3342	5.96	14	264	4.4	0.7	63	21	22	16	211	142	88	51	10	0.72	94	0	0	0	0	0	0	0	0	0	0	157.8	70.1	83	109	28.2	1	122	86	15.98	22.796	1	127.9	1	0	1		5.8	5.1	0.5
290	2	59.6795	5.29	14.1	238	4.4	1.1	125	30	30	57	169	94	188	37	11	0.59	118	0	1	1	0	0	1	1	1	0	1	149.2	52.2	75	98	23.4	0	114	85	11.9	22.7969	1	77.2	0	0	0		6.2	5	0.04
291	1	35.8986	10.41	16.2	422	4.5	1.5	50	45	52	41	199	123	150	46	10	0.99	107	1	1	1	0	0	0	1	1	0	1	173.6	115.3	122	121	38.3	1	133	93	28.11	24.3799	1	218.8	1	0	1		6.2	7.9	2.07
292	2	57.6795	6.09	13.2	273	4.2	0.6	53	22	16	32	181	105	82	60	19	0.42	113	0	0	0	0	0	0	0	0	0	0	151.1	53.9	84	84	23.6	0	85	66	12.29	22.8015	1	206.2	1	0	1	10.2	6.2	3.8	0.15
293	2	59.6192	7.24	13.9	296	4.4	0.8	81	22	18	18	225	143	72	68	15	0.71	97	0	1	1	0	0	0	0	0	0	0	153.3	62.7	83	98	26.8	1	116	84	14.3	22.807	1	128	1	0	0		5.6	3.5	0.32
294	2	68.0384	5.46	12.6	320	4.3	0.8	137	23	16	23	208	140	104	47	20	0.68	110	1	0	0	0	0	1	0	1	0	0	156.7	70.1	106	96	28.4	1	131	89	15.99	22.8103	1	146.4	1	0	0		5.6	3.3	0.21
295	2	40.1863	5.27	13.4	241	4.6	0.7	60	34	31	26	229	141	175	53	10	0.72	108	1	0	0	0	0	0	1	1	0	1	159.2	62.6	91	96	24.7	0	118	79	14.28	22.8115	1	99.3	0	0	0		5.8	6.5	0.05
296	1	50.3726	11.72	17.3	212	4	1.1	84	35	40	64	208	133	115	52	9	0.84	97	1	0	0	0	0	0	0	0	0	0	171.7	97	114	104	32.8	1	129	89	23.9	24.6392	1	223.9	1	1	1		6.2	6.3	0.43
297	1	40.737	10.12	15.3	346	4.5	1.6	92	58	126	131	222	138	271	30	10	0.75	156	1	0	0	0	1	1	1	1	0	1	166.6	97.3	115	112	35.1	1	125	82	23.99	24.6557	1	152.9	1	0	0		8.9	5.6	1.4
298	2	60.0877	4.81	13.1	365	4.3	1.2	113	34	32	82	186	122	111	42	12	0.7	90	1	0	0	0	0	1	1	1	1	0	153.9	66.5	99	104	28.1	1	123	76	15.17	22.812	1	158.7	1	0	0		5.8	3.2	0.4
299	1	60.1123	5.95	14.6	243	4.1	1.1	72	55	64	60	110	57	81	37	26	0.87	122	1	1	1	0	0	1	1	1	1	0	169.8	112.7	118	119	39.1	1	133	93	27.91	24.7649	1	296.3	1	0	1		6.9	7.1	0.31
300	2	68.9671	6.72	12.8	371	4.5	0.8	107	58	62	22	201	125	104	55	11	0.7	91	0	1	1	0	0	0	1	1	1	0	147.8	59.7	83	92	27.3	1	121	71	13.62	22.8141	1	116.5	1	0	0		6.6	5.7	0.18
301	1	38.0986	5.63	15.8	286	4.8	0.8	57	43	67	30	250	165	209	43	14	0.79	102	1	0	1	0	0	0	1	1	0	1	171.3	106.3	114	115.5	36.2	1	162	102	26.37	24.8071	1	205.6	1	0	1		5.7	6.5	0.68
302	2	55.3205	7.79	14.2	335	4.4	0.7	100	40	44	20	208	135	90	55	11	0.83	92	0	0	0	0	0	0	0	0	0	0	152.6	61.7	82	95	26.4	1	97	66	14.08	22.8201	1	108.9	1	0	0		5.9	6.8	0.19
303	2	58.6521	4.48	13.2	198	4.1	1	79	23	11	9	247	160	81	71	15	0.69	79	0	0	0	0	0	0	0	0	0	0	149.8	54.9	80	96	24.4	0	110	73	12.53	22.8233	1	90.9	0	0	0		5.3	4.3	0.05
304	1	34.0795	5.65	16.7	360	4.4	1.2	73	110	200	56	272	162	356	39	13	0.65	84	1	0	0	0	0	1	1	1	0	1	165.7	84.4	103	104	30.7	1	133	88	21.02	24.9052	1	146.1	1	0	0		5.7	9.7	0.07
305	1	34.1342	6.22	16.9	181	4.4	1.3	98	44	68	57	143	91	93	33	10	0.87	145	1	1	1	1	1	1	0	1	0	0	173.3	121.3	118	117	40.5	1	133	84	30.22	24.9134	1	263.3	1	0	0		10.8	7.9	0.79
306	2	36.2959	6.08	14.5	369	4.3	0.8	52	16	14	20	190	103	106	66	9	0.62	93	1	0	0	0	0	0	0	0	0	0	164.2	75.4	102	111	28	1	94	74	17.21	22.8249	1	136.1	1	0	1		5.1	5.8	0.08
307	2	45.8274	4.07	14.4	293	4.2	0.8	38	22	19	10	188	107	63	68	10	0.62	88	1	0	0	0	0	0	0	0	0	0	157.6	76.4	100	112	30.8	1	127	85	17.44	22.8272	1	116.1	1	0	1		4.8	3.8	0.09
308	2	69.3507	8.28	14	307	4.4	0.9	49	23	25	16	231	131	278	44	17	0.82	105	1	1	1	0	0	1	1	1	1	1	152.7	60.8	94	90	26	1	133	97	13.88	22.8289	1	116.3	1	0	0		5.9	4.9	0.75
309	2	32.2247	7.34	12.3	506	4.3	0.4	67	16	9	14	189	112	125	52	9	0.45	87	0	0	0	0	0	0	0	0	0	0	150.7	52.6	74	96	23.2	0	94	59	12.01	22.8327	1	69.6	0	0	1		5.3	6.1	0.08
310	2	60.674	3.91	13.2	299	4.4	0.7	94	20	11	17	208	116	53	81	15	0.62	81	0	0	0	0	0	0	0	0	0	0	154.7	50.1	76	96	20.9	0	111	69	11.44	22.8343	1	77.2	0	0	0		5.3	3.9	0.05
311	2	53.3178	6.02	14.7	327	4.8	0.8	81	32	50	24	239	162	45	68	13	0.61	85	0	1	1	0	0	0	0	0	0	0	157	51.8	83	93	21	0	127	90	11.83	22.8378	1	81.4	0	0	0		5	6.9	0.29
312	2	72.3123	7.15	14.3	237	4.5	1.1	61	26	22	19	219	150	110	47	16	0.78	101	1	1	1	0	0	1	0	1	0	0	155.4	60.6	89	99	25.1	1	95	69	13.84	22.8383	1	133.1	1	0	0		5.4	5.8	0.68
313	2	40.3479	6.46	12.8	293	4.1	0.4	46	14	10	20	175	89	116	63	9	0.59	113	1	0	0	0	0	0	0	0	0	0	163.4	76.1	91	109	28.5	1	107	71	17.38	22.8384	1	138.9	1	0	1		5.7	4.9	0.34
314	2	33.9315	8.2	12.5	400	4.3	1	80	33	56	16	209	135	167	41	14	0.6	84	1	0	0	0	0	1	1	1	0	1	156.9	78.9	97	111.5	32	1	124	79	18.02	22.839	1	144	1	0	0		5.1	6.5	0.2
315	1	56.6795	6.72	15.7	275	4.7	0.9	64	49	25	87	209	105	245	55	13	0.96	158	0	0	1	1	1	0	1	1	0	1	160.9	78.2	97	98	30.2	1	182	116	19.49	24.9233	1	120.4	1	0	1		7.1	4.8	0.07
316	2	29.674	4.95	13.4	229	4.4	1	55	16	8	10	194	109	61	73	10	0.64	90	0	0	0	0	0	0	0	0	0	0	160.8	68.3	81	102	26.4	1	107	78	15.6	22.8404	1	90.3	0	0	1		5.2	4.6	0.1
317	2	57.4219	4.22	12.6	238	4.4	0.9	75	24	16	10	138	72	64	53	17	0.53	102	1	0	0	1	1	0	1	1	1	0	156.6	72.7	98	98	29.6	1	116	71	16.61	22.8473	1	121.2	1	0	0		6.1	3.9	0.04
318	2	38.5096	7.06	13.3	298	4.3	0.6	59	29	25	18	172	95	133	50	10	0.64	123	1	0	0	0	0	0	0	0	0	0	148.7	62.2	90	101	28	1	123	78	14.22	22.8617	1	110	1	0	1		5.6	5.3	0.13
319	2	47.0274	5.56	14.4	242	4.8	1.2	74	40	32	55	210	90	84	103	11	0.61	98	1	0	0	0	0	0	0	0	0	0	156.7	67.7	96	99.5	27.6	1	114	80	15.48	22.8656	1	119	1	1	1		5.4	6.6	0.06
320	2	75.7973	10.42	11.9	263	4.2	0.8	82	24	26	42	122	42	196	41	15	0.8	176	1	1	1	1	1	1	1	1	1	1	141	49.5	95	89	24.9	0	132	62	11.32	22.8687	1	56.3	0	0	0		10.6	3.7	0.24
321	2	63.389	5.76	12.8	259	4.1	0.5	112	27	40	54	212	127	125	60	11	0.6	98	1	0	0	0	0	0	0	0	0	0	157.2	66.8	95	103	27	1	117	71	15.28	22.8743	1	122	1	0	0		5.8	3.9	0.45
322	2	70.663	3.61	12.6	192	4.2	1.4	67	27	22	14	159	86	61	61	15	0.8	100	0	1	1	0	0	0	1	1	1	0	147.7	55.3	86	93	25.3	1	113	71	12.65	22.8752	1	97.8	0	0	0		5.8	4.6	0.02
323	2	55.9808	3.52	12.4	285	4.2	0.8	71	37	41	30	186	102	99	64	13	0.71	102	1	1	1	0	0	0	1	1	1	0	148.2	57.5	89	96	26.2	1	109	75	13.16	22.887	1	150.9	1	0	0		6	4.7	0.03
324	2	71.5699	3.14	12	299	4.1	0.5	70	22	12	15	217	126	148	61	14	0.76	79	0	1	1	0	0	0	0	0	0	0	155.9	59.5	82	100	24.5	0	125	65	13.62	22.8908	1	111.9	1	0	0		6	4.4	0.2
325	2	68.9781	7.54	12.4	312	4.1	0.5	69	25	31	14	179	86	63	80	10	0.78	93	1	0	0	0	0	0	0	0	0	0	147.4	50.5	90.5	87	23.4	0	131	74	11.56	22.8911	1	104.3	1	0	0		6.2	4.4	0.02
326	2	43.2164	4.48	13.9	288	4.7	1.1	55	21	15	17	218	134	86	67	10	0.59	95	1	0	1	0	0	0	0	0	0	0	158.1	72.9	92.5	107.5	29.2	1	135	102	16.69	22.8944	1	133.8	1	0	1		5.4	5.1	0.09
327	2	48.2603	8.99	13.9	465	4.5	0.7	92	30	40	30	301	220	153	50	10	0.51	101	0	0	0	0	0	0	1	1	0	1	148.4	54.2	84	94	24.6	0	116	81	12.41	22.8967	1	89.4	0	1	0		6	5.2	0.15
328	2	52.4219	4.74	14.1	322	4	0.6	68	18	12	21	193	104	175	54	12	0.72	97	1	0	0	0	0	0	1	1	0	1	148.3	59.9	92	97	27.2	1	114	75	13.72	22.9048	0	130.8	1	0	0		5.9	4	0.11
329	2	64.0438	8.24	14.5	294	4.3	0.8	62	18	21	14	265	191	167	41	12	0.62	102	1	0	0	0	0	1	1	1	0	1	152.8	58.7	89	90	25.1	1	114	81	13.45	22.9131	0	99	0	0	1		5.9	5.3	0.16
330	2	59.2411	5.61	14.8	372	4.4	1	99	38	27	33	191	119	125	47	12	0.76	107	1	1	1	0	0	1	1	1	1	0	159.6	78.2	103	99	30.5	1	122	83	17.92	22.9156	0	150.2	1	0	0		6.4	5.2	0.22
331	2	34.1288	4.95	14.8	339	4.2	0.9	54	16	12	21	162	95	86	50	13	0.73	82	0	0	0	0	0	0	0	0	0	0	150.8	55.9	80	94	24.5	0	104	80	12.81	22.9159	0	74.3	0	0	1		5.6	5	0.12
332	2	80.8904	15.66	12.2	365	4.4	0.6	67	20	16	36	142	76	109	44	41	1.11	85	1	1	1	0	0	1	0	1	0	0	152	63.7	97	101	27.6	1	93	69	14.6	22.9199	0	126	1	0	0		6.2	7.6	0.02
333	2	35.9397	7.56	14.1	263	4.3	0.6	66	18	15	5	185	118	104	46	9	0.56	87	1	0	0	0	0	1	0	1	0	0	159.5	70.8	96	98	27.8	1	107	77	16.23	22.9237	0	112	1	0	0		5.6	4.7	0.17
334	2	68.4164	6.28	13.4	234	4	0.8	65	27	21	6	129	72	56	46	10	0.5	80	0	1	1	1	1	1	1	1	1	0	154.6	51.6	80	84.5	21.5	0	136	88	11.83	22.9264	0	106.5	1	0	0		6.8	3.6	0.04
335	2	80.1425	9.17	11.2	338	3.9	0.4	163	25	9	104	154	83	155	40	21	1.16	93	0	1	1	1	1	1	1	1	0	1	149.9	51.7	82	89	23	0	162	73	11.86	22.94	0	63	0	0	0		5.7	6.8	0.3
336	2	24.6438	6.93	14.4	296	4.5	0.7	85	22	25	23	243	165	173	43	15	0.9	97	1	0	0	0	0	1	1	1	0	1	158.7	83	101.5	107	32.8	1	100	67	19.05	22.9518	0	138.9	1	0	0		5.6	6.5	0.26
337	2	37.0959	5.44	13.9	380	4.3	1.2	74	18	13	15	190	124	80	50	12	0.81	88	0	0	1	0	0	0	0	0	0	0	156.7	61.6	86	97	25.1	1	137	92	14.14	22.9545	0	106.2	1	0	1		5.2	4.8	0.57
338	2	58.0795	7.17	12.3	337	4.2	0.6	86	36	47	90	211	135	141	48	12	0.67	88	1	0	0	0	0	1	0	1	0	0	163	82.9	103	107	31.2	1	111	75	19.03	22.9554	0	172.2	1	0	0		6.1	4.5	0.05
339	2	51.6164	3.9	13.6	210	4.4	0.9	32	23	7	48	116	61	52	45	15	0.73	89	1	1	1	0	0	1	1	1	1	0	150.9	62.8	93	104	27.6	1	103	69	14.42	22.9618	0	129.1	1	0	1	7.1	6.2	3.1	2.3
340	2	57.5178	2.08	15	157	4.2	0.7	69	38	32	15	205	146	81	43	12	0.67	76	1	0	0	0	0	1	0	1	0	0	153.8	70.4	91	104	29.8	1	118	80	16.17	22.9688	0	142.5	1	0	1		5.4	6.4	1.26
341	2	55.6986	4.61	14.9	179	4.6	1.3	81	29	22	9	188	117	70	57	12	0.58	101	0	0	0	0	0	0	0	0	0	0	154.1	56.9	69	92	24	0	115	75	13.07	22.9701	0	121.4	1	1	0		4.6	2.8	0.05
342	2	69.737	5.32	11.7	373	4.6	0.5	78	16	15	6	143	81	58	50	20	0.9	150	0	1	1	1	1	0	1	1	1	0	147.1	48.8	87	87.5	22.6	0	130	73	11.21	22.9713	0	108.9	1	0	0		7.5	4.7	0.04
343	2	58.6137	6.85	15.1	342	4.2	0.7	62	26	29	46	209	135	92	56	12	0.65	90	0	0	0	0	0	0	0	0	0	0	155.4	59.9	86	93	24.8	0	111	85	13.76	22.9716	0	110.5	1	1	1		5.3	5	0.03
344	2	56.6411	4.18	14.1	244	4.4	0.8	100	22	19	26	263	179	52	74	21	0.57	98	1	0	0	0	0	0	0	0	0	0	159.5	68.9	95	108	27.1	1	116	81	15.83	22.9753	0	140.2	1	0	0		5.6	4.8	0.06
345	2	56.1973	4.81	12.2	287	4	0.5	81	19	15	8	176	109	45	58	17	0.52	93	0	0	0	0	0	0	0	0	0	0	162.1	68.2	83	103	26	1	93	74	15.67	22.9765	0	92.5	0	0	0		5.6	4.2	0.14
346	2	45.2521	9.37	13.6	306	4.1	0.9	76	57	71	41	188	113	92	57	11	0.54	115	1	0	0	0	0	0	0	0	0	0	161.6	83.2	95	107	31.9	1	115	85	19.12	22.9808	0	192.3	1	0	0		6.4	4.5	1.16
347	2	50.0493	5.56	14.1	394	4.3	0.8	58	28	21	13	245	172	72	59	9	0.65	85	1	0	1	0	0	0	0	0	0	0	160.2	75.8	100	105	29.5	1	131	93	17.42	22.9815	0	113.8	1	0	1		5.6	5.8	0.05
348	2	48.0986	3.91	12.7	211	4.3	0.9	116	35	44	35	292	222	86	53	9	0.61	124	1	0	0	0	0	0	0	0	0	0	159.7	72.1	93	106	28.3	1	106	75	16.57	22.982	0	118.2	1	0	0		6.4	4.9	0.3
349	2	49.9699	4.95	12.8	382	4.1	0.7	56	26	21	18	180	118	63	49	13	0.66	111	0	0	1	0	0	1	0	1	0	0	153.8	62.3	85	98	26.3	1	180	113	14.32	22.9856	0	95.6	0	0	0		6.2	5.7	0.11
350	1	39.0301	13.11	17.7	462	4.7	1.2	64	61	76	166	297	179	371	44	17	1.12	138	1	1	1	0	1	0	1	1	0	1	167.9	102.8	109	112	36.5	1	142	107	25.76	25.0584	1	210.9	1	1	1		6.7	8	0.18
351	2	64.274	6.32	13.7	221	4.2	2.2	79	34	30	20	205	125	99	60	13	0.75	139	1	1	1	0	1	0	1	1	1	0	154.7	72.9	97	104	30.5	1	129	67	16.76	22.9904	0	144.6	1	0	0		8.1	4.4	0.28
352	1	40.1808	9.76	17	281	4.7	0.9	87	61	67	212	258		775	41	9	0.61	142	1	0	1	0	1	0	1	1	1	1	176.8	121.5	125	125	38.9	1	151	102	30.46	25.07	1	236.7	1	1	1	15.7	7.6	7.5	0.72
353	2	38.8986	5.02	12.2	256	4	1.2	48	20	17	13	223	153	50	60	6	0.6	90	1	0	0	0	0	0	0	0	0	0	158.7	76.8	94	106	30.5	1	113	79	17.66	22.9948	0	101.1	1	0	0		5.1	3.7	0.08
354	2	53.4384	7.72	12.9	289	4	0.6	96	29	27	20	242	174	132	42	8	0.6	80	0	0	0	0	0	1	0	1	0	0	141.7	37.7	68	79	18.7	0	105	77	8.67	22.9973	0	70.3	0	0	0		6.2	3.8	0.05
355	2	61.2055	5.79	11.7	394	4.6	0.6	69	27	12	15	215	147	100	48	9	0.97	82	0	0	0	0	0	1	0	1	0	0	152.5	44	70	80	18.9	0	96	72	10.12	23	0	92	0	0	0		5.4	5.8	0.05
356	2	52.8027	5.74	14.9	302	4.7	0.9	87	24	18	21	229	146	90	65	20	0.57	98	0	0	0	0	0	0	0	0	0	0	151.2	57	87	96	24.9	0	117	87	13.11	23	0	101	1	0	1		5.9	3.6	0.08
357	2	54.0247	6.24	14.9	233	4.2	1	64	17	21	24	225	146	69	65	9	0.7	86	0	0	1	0	0	0	0	0	0	0	152	44.5	73.5	85	19.3	0	116	92	10.24	23.0112	0	71	0	0	0		5.6	4.6	0.14
358	2	53.2904	5.69	14	287	4.6	0.6	84	21	14	16	253	153	90	82	5	0.57	140	1	0	0	0	1	0	0	0	0	0	157	59.1	88	101	24	0	103	80	13.6	23.0118	0	79	0	0	0		5.6	4.2	0.12
359	2	75.0795	5.2	11	182	4.1	0.8	54	21	12	17	149	75	100	54	17	0.73	131	0	1	1	0	1	0	1	1	1	0	149.3	58.6	87	99	26.3	1	146	70	13.49	23.0205	0	100.7	1	0	0		7.2	4.5	0.05
360	2	53.526	7.79	13.6	260	4.2	0.8	80	24	22	14	276	213	73	48	14	0.71	93	1	0	1	0	0	1	1	1	1	0	150.8	79.1	102	110	34.8	1	152	96	18.21	23.0215	0	158.6	1	0	0		6.1	6	0.27
361	2	50.2575	5.3	15.2	286	4.2	1.2	51	21	21	28	209		404	36	7	0.53	95	0	0	0	0	0	1	1	1	0	1	154.7	70.5	87	101	29.5	1	112	87	16.24	23.0355	0	122.8	1	0	0		5.3	4.6	0.06
362	2	52.7808	8.05	14.7	187	4.3	0.9	94	17	16	20	197	116	225	36	15	0.64	92	0	1	1	0	0	1	1	1	1	1	148.8	56	85	95	25.3	1	133	91	12.9	23.0357	0	117	1	0	0		5.1	4.9	0.08
363	1	39.7945	7.86	15.5	240	4.6	0.7	71	32	32	37	151	77	203	33	12	0.96	96	1	0	1	0	0	1	1	1	0	1	175	116.8	118	120	38.1	1	129	93	29.3	25.0856	1	232.4	1	0	0		6	5.3	0.59
364	2	36.5096	7.8	16.5	381	4.2	1	108	16	14	31	234	126	297	49	13	0.49	343	1	0	0	0	1	1	1	1	0	1	162.4	72.8	104	98	27.6	1	119	88	16.77	23.0357	0	139.1	1	0	0		13.2	5.5	0.28
365	2	47.9973	8.52	10.7	427	4.4	0.7	67	16	13	16	211	142	96	50	8	0.68	98	1	0	0	0	0	0	0	0	0	0	157.9	75.9	97	107	30.4	1	128	88	17.49	23.0435	0	121.8	1	0	1		5.8	3.7	0.5
366	2	76.5644	5.93	12.9	276	4.2	0.7	52	29	25	50	158	81	149	47	11	0.63	125	1	1	1	1	1	1	0	1	0	0	148.1	54.2	94	92	24.7	0	184	96	12.49	23.0443	0	114.2	1	0	0		6.6	4.9	0.14
367	1	35.0055	7.6	16.9	359	4.1	1.5	68	21	32	53	233	169	97	45	8	0.93	87	1	1	1	0	0	0	0	0	0	0	171.3	111.8	116	120	38.1	1	160	105	28.12	25.1521	1	173.4	1	0	0		5.5	6.5	1.62
368	2	56.6301	5.95	13.4	290	4.2	1.5	121	68	92	74	200	124	130	50	9	0.58	94	1	0	1	0	0	0	1	1	1	0	153.9	64.6	90	100	27.3	1	147	85	14.89	23.0495	0	120.1	1	0	0		5.9	6.2	0.08
369	2	61.5068	6.36	14.8	334	4.8	0.7	60	23	27	25	205	112	204	52	11	0.77	113	1	1	1	0	0	0	1	1	1	1	149.3	64.6	90	96.5	29	1	130	97	14.89	23.0495	0	123.5	1	0	1		5.9	5.1	0.11
370	2	77.326	7.84	12.9	221	4.3	0.9	115	25	22	22	159	79	145	51	13	0.68	101	1	1	1	0	0	0	1	1	1	0	151	61.9	91	103	27.1	1	103	72	14.27	23.0533	0	144.6	1	0	0		5.8	4.6	0.12
371	2	57.6274	8.44	14.1	373	4.3	0.7	84	20	31	24	216	117	194	60	13	0.57	105	0	0	0	0	0	0	1	1	0	1	151.2	59.9	87	98	26.2	1	117	85	13.81	23.0551	0	119	1	0	0		6	5.9	0.38
372	1	47.126	8.45	14.1	273	4.6	1.1	58	23	31	42	203	136	150	37	13	0.74	86	1	0	1	0	0	1	1	1	0	1	170.9	96.6	106	111	33.1	1	144	96	24.3	25.1553	1	171.7	1	0	1		5.7	5.3	0.31
373	1	34.8712	8.07	14.2	302	4.3	0.6	46	32	36	89	156	47	375	34	11	0.82	120	1	1	1	0	0	1	1	1	1	1	163.5	91.7	107	106	34.1	1	127	84	23.09	25.1799	1	157.3	1	0	1		6.3	5.4	0.46
374	1	30.7014	6.92	14.2	236	4.4	1.1	57	26	37	58	178	115	133	36	15	0.81	99	1	0	0	0	0	1	0	1	0	0	167.9	98.6	106	111	34.9	1	124	88	24.8433	25.196	1	141.419	1	1	1		5.7	6.5	0.7
375	1	55.9863	5.19	15.8	208	4.3	0.9	78	65	124	52	175	114	84	44	12	0.71	109	1	1	1	0	0	0	1	1	1	0	167.2	91.2	110	109	32.6	1	145	103	22.99	25.2083	1	126.1	1	0	0		6.3	4.2	0.17
376	2	60.5397	5.23	14.1	224	4.4	1.1	114	20	10	9	231	155	50	66	16	0.74	95	1	0	0	0	0	0	0	0	0	0	153.5	63.5	88	96	26.8	1	112	83	14.64	23.0551	0	145.4	1	0	0		5.6	4.8	0.1
377	2	37.2658	8.41	9.6	351	4.6	0.6	65	14	13	8	177	109	79	52	14	0.58	73	0	0	0	0	0	0	0	0	0	0	155.8	58.2	77.5	94	24	0	120	87	13.42	23.0584	0	77.4	0	0	0		5.2	4.8	0.03
378	2	60.411	5.75	15.7	316	4.7	1.1	80	36	68	26	231	133	182	62	11	0.71	107	0	1	1	0	0	0	1	1	0	1	156.6	61.1	82	95	24.9	0	100	78	14.09	23.0606	0	118.4	1	0	0		5.9	4.3	0.1
379	2	54.5014	5.19	13.7	247	4.3	0.6	61	22	17	9	163	104	52	49	11	0.73	74	0	0	0	0	0	1	0	1	0	0	150.6	67.9	79	106	29.8	1	114	88	15.66	23.0633	0	125.6	1	0	0		5.4	4.6	0.05
380	2	72.4904	5.7	14.6	248	4.9	1.6	96	29	24	21	226	146	69	66	15	0.88	99	1	0	1	0	0	0	1	1	1	0	151.2	61.6	89	97	26.9	1	147	87	14.21	23.0682	0	112.6	1	0	0		6.6	3.9	0.05
381	2	57.611	5.17	14.5	266	4.2	0.7	77	26	24	18	162	99	56	52	19	0.78	89	1	0	0	0	0	0	1	1	1	0	162.3	84.7	105	113	32.2	1	123	75	19.54	23.0697	0	150.6	1	0	0		5.6	5.9	0.06
382	2	69.1863	3.84	13.5	210	4.3	0.5	44	28	25	70	225	80	126	120	19	0.77	84	1	1	1	0	0	0	1	1	1	0	155	57.6	90	92	24	0	111	73	13.29	23.0729	0	107.4	1	0	1		5.8	5	0.08
383	2	65.9123	8.74	14.2	264	4.2	0.9	58	27	26	42	136	66	96	51	17	0.86	107	1	1	1	1	1	0	1	1	1	0	153.7	60.8	92	99	25.7	1	99	70	14.03	23.0757	0	118.7	1	0	0		5.9	5.2	0.09
384	2	60.8356	3.83	13.3	290	4.2	0.7	63	22	20	11	279	192	140	59	12	0.6	86	0	0	0	0	0	0	1	1	1	0	146.9	52	79	90	24.1	0	119	81	12	23.0769	0	121.1	1	0	0		5.6	3.8	0.11
385	1	73.2685	10.5	13.8	305	4	0.8	88	32	72	48	199	98	173	66	21	0.75	84	0	1	1	0	0	0	1	1	1	1	167.9	69.4	95	94	24.6	0	141	89	17.51	25.2305	1	211.7	1	0	0		7.1	5.5	0.37
386	2	60.1425	7.12	14.2	260	4.5	0.8	62	31	30	67	268	194	141	46	15	0.56	92	1	0	0	0	0	1	1	1	1	0	150.4	60.1	93	99	26.6	1	93	73	13.87	23.0782	0	86.3	0	0	0		5.5	5.6	0.61
387	2	43.2548	5.67	13.7	258	4.4	0.9	66	32	49	15	162	100	97	43	8	0.72	98	1	0	0	0	0	1	0	1	0	0	161.1	66.9	98	103	25.8	1	96	77	15.44	23.0792	0	126.7	1	0	0	12.1	6.1	4.3	0.5
388	2	38.6658	4.04	13.4	306	4.3	1.1	42	19	10	22	227	144	92	65	10	0.61	78	1	0	0	0	0	0	0	0	0	0	157.2	63	93	100.5	25.8	1	96	79	14.54	23.0794	0	104.6	1	0	1		5.4	3.8	0.02
389	2	53.6959	3.32	12.1	227	4.2	0.6	58	28	24	29	181	72	136	82	11	0.5	114	1	1	1	1	1	0	1	1	1	0	158.3	74.3	101	107	29.7	1	126	87	17.15	23.0821	0	106.7	1	0	1	15.5	5.8	4.8	0.05
390	2	59.5726	4.33	12.4	305	4.2	0.6	81	26	18	22	336	236	263	47	16	0.82	108	1	0	0	0	0	1	1	1	0	1	161.3	78.4	106	106	30.1	1	133	77	18.1	23.0867	0	168.9	1	0	0		6.3	6.2	0.24
391	2	36.6795	5.17	14	256	4	0.7	59	37	24	22	151	65	98	66	10	0.54	101	1	1	1	0	0	0	0	0	0	0	159.6	83.9	103	112	32.9	1	124	86	19.37	23.087	0	166.8	1	0	0		5.8	3.8	0.2
392	1	62.1644	7.47	17.9	216	4.7	1.1	70	23	28	17	255	192	164	30	23	1.11	96	0	0	0	0	0	1	1	1	1	1	162	71.3	90	92	27.2	1	116	88	18	25.2454	1	162.8	1	1	1		6.3	5.8	0.02
393	2	72.8603	6.84	12.8	241	4.4	0.8	80	40	43	26	205	138	91	49	11	0.63	128	1	1	1	0	1	1	1	1	1	0	155.1	66.9	98	100	27.8	1	132	83	15.45	23.0942	0	139.4	1	0	0		7.3	6	0.3
394	2	64.5644	6.81	13	261	4.1	0.7	97	19	11	10	156	78	93	59	11	0.51	142	1	0	0	1	1	0	0	0	0	0	157.2	75.3	112	110	30.5	1	115	73	17.39	23.0943	0	153.4	1	0	0	8.8	7.3	4.8	0.3
395	2	66.3671	7.64	15.7	325	4.4	0.8	84	52	58	24	176	97	68	65	9	0.57	90	0	1	1	0	0	0	1	1	1	0	154.7	57.4	86.5	87	23.9	0	133	77	13.26	23.101	0	109.8	1	0	0		5.8	5	0.48
396	2	65.5096	5.83	12.3	214	4.3	0.9	118	27	23	16	254	181	89	55	22	0.62	106	1	1	1	0	0	0	1	1	1	0	151.6	63.5	88	98.5	27.5	1	135	70	14.67	23.1024	0	129.9	1	0	0		5.7	3.6	0.06
397	2	29.1315	7.62	12.3	301	4.2	0.6	52	22	11	14	190	84	105	85	7	0.63	93	0	0	1	0	0	0	0	0	0	0	148.4	55.7	78	101	25.3	1	124	93	12.87	23.1059	0	83.5	0	0	1		5.4	5.4	0.02
398	2	68.7863	4.63	12.9	222	4.3	0.4	98	29	27	20	181	88	84	76	14	0.64	136	0	0	0	1	1	0	1	1	1	0	146.2	55	83	94	25.8	1	110	57	12.71	23.1091	0	129.9	1	0	0		8.1	4.8	0.03
399	2	27.3315	8.71	13.6	286	4.6	0.7	43	18	7	24	148	71	75	62	12	0.55	86	0	0	0	0	0	0	0	0	0	0	162	63.5	75	102	24.2	0	98	79	14.68	23.1181	0	73.5	0	0	1		5.2	7.7	0.18
400	2	61.6192	6.16	12.7	333	4.5	1.5	65	27	25	28	249	143	64	93	15	0.68	92	0	0	0	0	0	0	0	0	0	0	157.8	57.6	86.5	94	23.1	0	107	79	13.32	23.125	0	81.6	0	1	0		5.6	3.9	0.61
401	2	53.8329	5.14	13	285	4.3	0.5	82	17	16	13	216	132	75	69	17	0.54	103	0	0	1	0	0	0	0	0	0	0	155.3	59.2	82	94	24.5	0	139	93	13.69	23.125	0	93.8	0	0	0		6.1	4.3	0.05
402	2	56.7123	4.53	13.6	280	4.4	1.2	57	24	14	13	229	139	70	76	12	0.75	86	1	1	1	0	0	0	0	0	0	0	148.6	60.8	96	105	27.5	1	108	76	14.06	23.125	0	102.2	1	0	1		5.2	5.4	0.03
403	2	68.9123	4.04	13.1	330	4	0.7	46	23	19	10	184	112	109	50	13	0.71	90	1	1	1	0	0	0	0	0	0	0	153	66.5	92	103	28.4	1	108	74	15.38	23.1278	0	102.8	1	0	0		5.1	5.5	0.05
404	2	45.9041	7.39	14	395	4.6	0.8	85	33	42	49	218	135	172	49	12	0.76	132	1	0	1	0	1	1	1	1	0	1	167.7	93	105	116	33.1	1	137	94	21.51	23.129	0	155.8	1	0	0		6.3	6.6	0.56
405	2	58.7534	8.02	14.1	334	4.1	0.7	84	46	32	34	209	135	82	58	16	0.7	84	1	0	0	0	0	0	1	1	1	0	148.3	57.2	94	102	26	1	110	69	13.23	23.1294	0	90.8	0	0	1		5.7	5.8	0.63
406	2	53.4164	8.54	13.5	202	4.6	0.7	67	30	24	14	162	83	57	68	25	0.49	60	0	0	0	0	0	0	1	1	1	0	144.7	42.5	74	86	20.3	0	91	62	9.83	23.1294	0	77.4	0	0	0		5.6	4	0.15
407	2	37.526	8.88	13.5	345	4.3	0.6	82	15	17	11	211	129	214	39	8	0.79	93	1	0	1	0	0	1	1	1	0	1	163.1	73.7	96	104	27.7	1	139	100	17.05	23.1343	0	117.9	1	0	0		6	7	0.49
408	2	53.8548	6.3	13.7	280	3.9	0.6	60	20	19	15	164	89	130	49	12	0.57	90	1	0	0	0	0	1	1	1	1	0	151.1	64.1	90	105	28.1	1	107	79	14.83	23.1357	0	126.4	1	0	1		5.9	5.4	0.11
409	2	70.5178	6.14	13	259	3.9	0.6	68	39	35	43	272	192	129	54	10	0.7	127	1	1	1	1	1	0	1	1	1	0	157.7	87	94	110	34.9	1	142	87	20.13	23.1379	0	141.3	1	0	1		7.8	7.2	0.32
410	2	56.211	5.18	13.7	189	4.3	1.3	64	28	17	10	221	149	61	60	13	0.69	85	0	0	0	0	0	0	0	0	0	0	156.4	61.1	75.5	96	25.1	1	117	80	14.14	23.1424	0	115.8	1	0	0		5.5	3.4	0.09
411	2	65.0027	8.36	13.3	217	4.2	0.6	68	24	27	30	181	116	95	46	13	0.52	191	1	0	0	1	1	1	0	1	0	0	142.6	48.3	88	83.5	23.6	0	119	66	11.18	23.147	0	83.2	0	0	0		10.4	3.7	0.19
412	1	74.0329	7.63	15.2	359	4.5	0.9	79	48	31	99	191	124	175	32	13	1.08	111	0	1	1	1	1	1	1	1	1	1	159.6	66.4	94	94	26.1	1	91	59	16.86	25.3916	1	148.9	1	1	1		6.5	5.8	0.93
413	2	30.8575	5.57	13.5	416	4.6	0.7	55	19	11	10	214	128	58	74	10	0.6	91	1	0	1	0	0	0	0	0	0	0	159.5	73.4	101	104	28.9	1	117	93	16.99	23.1471	0	119.4	1	0	0		5.5	3.5	0.11
414	2	52.2822	5.45	13.6	275	4.6	0.6	83	22	25	18	217	142	142	47	15	0.59	99	1	0	0	0	0	1	0	1	0	0	156.7	72.7	94	100	29.6	1	110	76	16.83	23.1499	0	125.8	1	0	0		5.8	4.9	0.15
415	2	53.2603	6.79	14.6	237	4.1	0.8	46	40	27	50	158	76	78	66	16	0.57	109	1	1	1	0	0	0	1	1	1	0	154.7	80.6	107	109	33.7	1	180	109	18.66	23.1514	0	149.2	1	0	1		5.7	4.6	0.08
416	2	83.2493	6.26	14.8	326	4.1	1.6	62	22	17	18	167	76	267	38	12	0.68	117	1	1	1	0	0	1	1	1	1	1	155.8	71	103	103	29.2	1	143	91	16.44	23.1549	0	183.9	1	0	0		6.4	4.8	0.21
417	2	55.4247	3.72	14.5	224	4.1	0.6	93	58	59	66	229	156	115	50	12	0.71	109	1	0	1	0	0	0	0	0	0	0	155.8	73.2	92	98	30.1	1	138	92	16.95	23.1557	0	199.8	1	0	0		6	4.8	0.23
418	2	78.0192	3.64	12.3	158	4.4	0.8	81	41	28	16	145	77	57	57	9	0.52	104	0	1	1	1	1	0	1	1	1	0	154.5	51	81	90	21.4	0	136	64	11.81	23.1569	0	80.4	0	0	0		5.8	5.2	0.09
419	2	38.1452	4.93	14	315	4.5	0.9	50	18	11	9	272	180	87	75	16	0.67	88	0	0	0	0	0	0	0	0	0	0	149.1	45.6	73	90	20.5	0	105	74	10.56	23.1579	0	58.1	0	0	1		5.4	4.1	0.03
420	2	39.7808	5.24	13.9	302	4.5	0.9	61	20	16	14	261	184	57	66	12	0.69	88	1	0	1	0	0	0	0	0	0	0	158.8	66.5	93	104	26.3	1	129	102	15.4	23.1579	0	107.2	1	0	1		5.5	5.5	0.29
421	2	57.9315	3.63	14.7	300	4.4	0.8	100	22	17	11	265	190	76	60	11	0.69	87	1	0	1	0	0	0	1	1	1	0	155.9	66.8	98	94	27.4	1	133	91	15.47	23.1587	0	113.8	1	0	0		5.4	3.9	0.02
422	1	44.0438	6.79	17.6	227	4.4	1.2	71	72	115	51	181	110	101	51	9	0.77	98	1	1	1	0	0	0	0	0	0	0	178.8	106.8	118.5	115	33.4	1	148	112	27.13	25.4026	1	212.8	1	1	1		5.9	5.6	0.26
423	1	32.1562	8.01	16	328	4.5	1.4	76	34	62	172	176	96	64	67	12	0.83	91	1	1	1	0	0	0	0	0	0	0	172.5	94.3	106	114	31.5	1	148	109	23.96	25.4083	1	148.7	1	0	1		5.4	8.3	0.44
424	2	74.2055	5.93	14	133	4	1.2	71	22	16	25	161	91	142	42	17	0.77	113	1	1	1	0	0	1	1	1	1	0	150.9	69.3	100	104	30.4	1	140	65	16.05	23.1602	0	95.5	0	0	0		6.3	6.3	0.1
425	2	63.0493	6.04	13.6	223	4.5	1.2	68	65	79	81	207	125	103	61	8	0.59	111	0	1	1	1	1	0	0	0	0	0	150.9	59.8	86	99	26.3	1	118	76	13.85	23.1605	0	109.3	1	0	0		6.3	5.3	0.65
426	2	44.6301	4.47	8	426	4.2	0.5	22	17	10	7	183	110	93	54	11	0.51	84	0	0	0	0	0	0	0	0	0	0	147.6	51.5	71	92	23.6	0	105	70	11.93	23.165	0	76.5	0	0	0		5.3	3.3	0.02
427	2	60.6247	6.8	14.6	265	4.4	1.2	83	23	24	15	232	167	65	52	10	0.57	92	1	0	0	0	0	0	0	0	0	0	145.3	58.1	90	98	27.5	1	110	75	13.46	23.167	0	110.7	1	0	0		6	4.4	0.07
428	2	59.4466	3.62	12.8	246	4.5	1.2	98	23	18	12	125	62	49	53	14	0.56	108	0	1	1	0	0	0	1	1	1	0	147	42.3	66	81.5	19.6	0	122	67	9.8	23.1678	0	62.3	0	0	0		5.8	3.6	0.02
429	2	61.2137	6.14	14.4	281	4.4	1.1	80	22	16	12	253	169	160	52	17	0.67	84	0	0	1	0	0	0	1	1	0	1	151.5	64.7	86	101	28.2	1	144	92	14.99	23.1685	0	114.4	1	0	0		5.7	6	0.24
430	2	68.8822	5.5	14.8	369	4.6	1	83	26	25	29	188	104	70	70	16	0.92	104	0	1	1	0	0	0	1	1	1	0	151.7	57.7	79	98	25.1	1	121	85	13.37	23.1716	0	132.5	1	0	0		6.4	5.1	0.05
431	2	63.5014	2.59	16.1	204	4.5	1	91	39	36	44	238	150	51	78	10	0.66	94	0	0	0	0	0	0	0	0	0	0	146.7	50	80	92	23.2	0	113	80	11.59	23.18	0	84	0	0	1		5.7	6.1	0.07
432	2	52.7178	4.74	14.4	315	4.4	1.9	79	26	34	30	171	99	103	51	12	0.56	96	1	1	1	0	0	0	0	0	0	0	156.6	63.7	92	97	26	1	132	89	14.77	23.1868	0	152.2	1	0	1		5.6	6.8	0.25
433	2	57.2411	5.47	14.9	311	4.3	0.8	68	31	16	30	243	178	76	50	12	0.53	159	1	1	1	0	1	0	0	0	0	0	153.4	59.3	93	94	25.2	1	89	60	13.75	23.1872	0	98.7	0	0	0		8	5.3	0.35
434	2	30.9096	9.16	12.8	290	4.2	0.9	93	19	23	24	211	126	170	51	7	0.72	78	1	0	0	0	0	0	1	1	0	1	163.2	80.9	98	107	30.4	1	114	75	18.76	23.1891	0	139.9	1	0	1		5.4	5.8	0.4
435	2	64.9233	9.22	13.6	313	4.2	1	63	22	21	27	212	118	220	50	11	0.68	101	0	1	1	0	0	0	1	1	1	1	146.7	53.3	77	92	24.8	0	104	68	12.36	23.1895	0	85.3	0	0	0		5.6	6	1.5
436	2	69.4438	7.4	12.7	346	4.2	0.6	97	18	15	19	157	71	247	37	16	0.39	98	0	0	0	0	0	1	1	1	1	1	147.6	45	81	89	20.7	0	119	63	10.44	23.2	0	84.3	0	0	0		5.5	2.6	0.73
437	1	33.6493	6.03	15.4	240	4.5	0.7	71	173	317	92	289	196	224	48	11	0.77	99	1	1	1	0	0	0	1	1	0	1	171	90.2	102	108	30.8	1	138	99	22.94	25.4324	1	155.1	1	0	1		5.8	8.3	0.27
438	1	74.4329	6.47	14.2	233	4.1	1.5	54	22	15	14	200	115	119	61	17	0.9	95	0	1	1	0	0	0	0	0	0	0	158.6	64.9	92	101	25.8	1	136	72	16.51	25.4391	1	141.7	1	0	1		5.8	6.1	0.1
439	2	63.7616	4.76	13.5	207	4.3	1.3	66	23	13	20	250	183	43	58	20	0.71	87	0	0	0	0	0	0	0	0	0	0	145.8	41.8	70	86	19.7	0	90	69	9.7	23.2057	0	78.7	0	0	0		5.6	4.1	0.07
440	2	55.8795	8.22	15.3	242	4.5	1	100	35	68	27	279	199	130	54	14	0.72	104	1	0	1	0	0	0	0	0	0	0	156.5	68.6	90	94	27.8	1	115	91	15.92	23.207	0	150.5	1	0	0		5.9	7	0.28
441	1	41.0247	8.55	14.7	324	4.4	0.7	44	22	16	32	180	90	318	26	14	0.9	99	1	1	1	0	0	1	1	1	0	1	166.8	93.8	102	109	33.7	1	106	76	23.91	25.4904	1	152.4	1	1	1		5.9	2.5	0.34
442	2	71.6658	5.47	13.3	285	4.5	0.8	75	24	17	35	170	81	133	62	13	0.56	89	0	0	0	0	0	0	1	1	1	0	153	53	86	99	22.6	0	122	65	12.3029	23.2131	0	106.813	1	0	0		5.8	3.6	0.08
443	1	43.6274	6.19	9.3	397	4	0.5	50	26	31	26	201	134	224	22	9	0.85	157	1	1	1	1	1	1	1	1	1	1	175	112.6	115	118	36.8	1	142	94	28.71	25.4973	1	160.8	1	0	0		5.6	6.9	0.89
444	2	63.389	7.57	12.3	345	4.3	0.6	84	18	14	17	177	104	75	58	18	0.85	101	1	1	1	1	1	0	0	0	0	0	151.6	56.6	91	102	24.6	0	140	73	13.14	23.2155	0	103	1	0	0		6	5.5	0.07
445	2	83.4329	7.74	14.1	270	4.3	0.9	61	34	33	18	168	86	168	48	11	0.69	84	1	1	1	0	0	1	1	1	0	1	158.2	66.5	101	99	26.6	1	162	73	15.44	23.218	0	113.1	1	0	0		6.4	5.7	0.08
446	2	60.0712	9	14.6	320	4.5	1.2	130	23	20	56	181	100	176	46	8	0.84	115	0	1	1	0	0	1	1	1	0	1	148.7	52.8	87	91	23.9	0	130	77	12.26	23.2197	0	81.4	0	0	0		5.8	6	0.84
447	2	67.7507	5.07	12	246	4	0.6	83	26	17	12	213	138	42	67	16	0.63	84	1	1	1	0	0	0	0	0	0	0	154.9	66.1	91	102	27.5	1	114	86	15.35	23.2224	0	128.9	1	0	0		5.7	4.6	0.06
448	2	57.2247	5.33	13	255	4.3	1.1	96	28	23	16	193	112	168	47	9	0.88	115	1	1	1	1	1	1	1	1	1	1	163.2	78.8	102	105	29.7	1	108	74	18.3	23.2234	0	129.1	1	0	1		6.6	7.7	0.05
449	2	71.6959	4.79	14.6	254	4.4	0.8	71	23	24	20	147	83	112	42	9	0.69	94	1	1	1	0	0	1	1	1	1	0	158.1	69.8	98	95	28	1	101	80	16.21	23.2235	0	136.6	1	0	0		5.8	3.4	0.04
450	2	62.0384	3.61	13.8	266	4.6	0.9	70	35	44	38	248	170	103	57	20	0.55	82	0	0	0	0	0	0	1	1	1	0	156.2	56.4	86.5	91	23.1	0	88	58	13.1	23.227	0	79	0	0	0		5.8	4.6	0.03
451	2	77.1315	4.7	12.3	197	4.3	1.2	71	59	65	38	167	97	38	62	18	0.72	95	1	1	1	0	0	0	0	0	0	0	147.7	63.8	94	98	29.2	1	126	55	14.82	23.2288	0	99.3	0	0	0		5.8	4.5	0.03
452	2	41.5288	4.58	13.1	282	4.2	1.6	54	21	18	57	161	42	130	93	10	0.68	96	1	0	0	0	0	0	0	0	0	0	160.1	78.2	105	115	30.5	1	113	74	18.17	23.2353	0	129.1	1	0	1		5.1	5.3	0.06
453	2	46.7233	7.57	15.4	250	4.6	0.7	70	17	24	35	231	157	124	49	12	0.67	112	1	0	1	0	0	1	0	1	0	0	159.4	69.8	90	99	27.6	1	168	98	16.22	23.2378	0	138.5	1	0	1		4.7	5.2	0.26
454	1	58.0575	6.77	16.2	211	4.4	1.5	72	35	39	38	189	127	113	39	16	0.9	114	1	1	1	0	0	1	1	1	1	0	171.8	104.1	113	110	35.2	1	141	95	26.58	25.5331	1	179.4	1	1	1		6.3	6.6	0.22
455	2	55.874	4.54	13.6	276	4.2	1.5	59	18	12	10	168	98	167	37	11	0.55	90	0	0	0	0	0	1	1	1	0	1	153.8	61.4	83	98.5	25.9	1	106	71	14.27	23.241	0	113.8	1	0	0		5.2	5.5	0.05
456	2	63.137	6.66	15.4	170	4.8	1.4	77	41	30	17	192	114	113	55	16	0.45	90	1	1	1	1	1	0	1	1	1	0	146.6	51.2	89	88	23.8	0	123	74	11.9	23.2422	0	72.1	0	0	0		6.9	3.3	0.08
457	2	78.7479	4.73	13.2	217	4	0.7	58	42	25	21	203	132	87	54	11	0.64	101	0	0	0	0	0	0	0	0	0	0	150.1	56.1	82	99	24.9	0	114	79	13.04	23.2442	0	85.2	0	0	1		5.3	3.7	0.48
458	2	63.9315	6.07	11.8	204	4	0.5	103	39	45	34	135	69	88	48	27	1.16	128	1	1	1	1	1	1	1	1	1	0	163	94.3	108	113	35.5	1	146	79	21.92	23.245	0	187.8	1	0	0		7.4	6.9	0.25
459	2	35.6877	5.47	14.4	319	4.7	0.8	78	17	13	15	224	159	84	48	8	0.62	81	1	0	0	0	0	1	0	1	0	0	163.2	76.4	94	106	28.7	1	111	78	17.76	23.2461	0	123.1	1	0	0		5	5.4	0.21
460	2	37.1753	3.77	13	248	4	0.7	69	34	32	35	208	138	148	40	5	0.73	112	1	0	0	0	0	1	0	1	0	0	164.7	105.3	109	123	38.8	1	128	86	24.48	23.2479	0	171.9	1	1	1	6.3	5.6	4.9	0.24
461	2	71.4329	6.48	14.7	183	4.7	1.4	117	31	21	11	160	90	81	54	12	0.67	92	0	1	1	0	0	0	1	1	1	0	149.6	60	85	97	26.8	1	164	86	13.95	23.25	0	152.3	1	0	0		5.4	5	0.47
462	2	38.8164	5.2	13.8	280	4.1	0.7	135	23	37	26	154	88	159	34	14	0.39	98	0	0	0	0	0	1	1	1	0	1	159.6	56.9	85.5	96	22.2	0	113	89	13.23	23.2513	0	91.4	0	0	1		5.2	4.9	0.03
463	2	52.7479	3.82	13.5	219	4.4	1.2	78	33	40	30	257	168	130	63	11	0.5	105	1	0	1	0	0	0	0	0	0	0	157.4	71.6	97	103	28.9	1	144	93	16.65	23.2542	0	163.2	1	0	1		5.4	4.4	0.1
464	2	62.4548	9.41	15.2	363	4.5	0.7	62	25	26	38	192	122	48	60	11	0.66	90	1	0	1	0	0	0	0	0	0	0	145	60.1	93	98	28.6	1	146	97	13.98	23.2612	0	120.1	1	0	0		5.8	4.8	0.07
465	2	54.5507	6.08	13.8	323	4.6	0.8	267	55	53	360	225	121	93	85	10	0.53	110	0	0	0	0	0	0	0	0	0	0	150.6	56.7	83	93	25	1	117	80	13.19	23.2628	0	83.7	0	0	0	6.5	6.8	5.9	0.63
466	2	34.9836	6.2	13.1	318	4.4	0.7	58	18	15	12	187	132	78	39	9	0.55	98	0	0	0	0	0	1	0	1	0	0	150.1	53.6	80.5	93	23.8	0	119	81	12.47	23.2649	0	70.3	0	0	0		5.4	4.8	0.06
467	2	63.5507	6.38	15	259	4.6	0.8	50	41	39	21	253	176	81	61	18	0.71	91	0	0	0	0	0	0	1	1	1	0	146.4	49.3	74	85	23	0	112	83	11.47	23.2657	0	91.7	0	0	0		5.5	4.2	0.03
468	2	62.5671	6.14	15.5	348	4.9	1.5	80	32	37	24	151	77	145	45	15	0.74	111	0	1	1	0	0	1	0	1	0	0	158.5	64.6	82	95	25.7	1	131	91	15.03	23.2663	0	151.5	1	0	0		6.2	3.7	0.07
469	2	55.2795	5.56	14.4	223	4.6	0.9	103	38	44	44	228	157	88	53	12	0.64	103	1	0	0	0	0	0	0	0	0	0	157	62.3	90	104	25.3	1	102	71	14.5	23.2745	0	119.8	1	0	0		5.7	5.5	0.23
470	2	86.2767	8.02	13.8	272	4.1	0.8	85	21	11	15	236	169	102	47	12	0.62	113	1	1	1	0	0	1	0	1	0	0	153.8	54.9	90	95	23.2	0	153	69	12.78	23.2787	0	104.2	1	0	0		6.8	4.6	0.16
471	2	44.7014	5.86	16.8	271	4.4	2	61	20	13	14	209	132	61	65	7	0.55	90	1	0	1	0	0	0	0	0	0	0	157.5	70	96	106	28.2	1	129	90	16.3	23.2857	0	108.5	1	0	0		5	3.9	0.08
472	2	71.0986	5.38	14.8	244	4.4	0.8	90	32	34	31	204	127	148	47	13	0.61	104	1	0	0	0	0	1	0	1	0	0	151.1	69.6	92	99	30.5	1	122	76	16.21	23.2902	0	138.8	1	0	0	11.8	6.4	4.2	0.05
473	2	56.8027	5.06	13.8	302	4.6	0.9	77	25	22	19	200	133	41	59	21	0.62	80	0	0	0	0	0	0	0	0	0	0	154.8	60.1	87	99	25.1	1	114	72	14	23.2945	0	97.1	0	0	0		5.7	4	0.4
474	2	70.1123	4.78	12.8	231	4.3	0.9	64	29	30	13	137	70	100	47	19	1	155	1	1	1	1	1	1	1	1	1	0	151.8	66.7	92	95	28.9	1	116	82	15.54	23.2984	0	145.5	1	0	0		6.6	4	0.08
475	2	74.5671	5.29	13.8	298	4.5	0.5	79	23	17	20	188	114	113	51	23	0.72	88	1	1	1	0	0	0	0	0	0	0	146.5	55.1	88	97	25.7	1	108	64	12.84	23.3031	0	113	1	0	0		5.7	4	0.05
476	2	46.0548	6.16	12.2	297	4.3	0.4	49	28	25	15	218	141	104	56	13	0.75	88	1	0	1	0	0	0	0	0	0	0	162.1	91.4	110	115	34.8	1	148	87	21.3	23.3042	0	154.6	1	0	0	11.9	5.8	4.5	0.14
477	2	26.9945	7.53	13.4	366	4.3	0.5	48	20	15	18	188	87	152	71	9	0.59	81	1	0	0	0	0	0	1	1	0	1	165	80.5	94	114	29.6	1	122	83	18.76	23.3043	0	138.4	1	0	1		5.2	4.1	0.08
478	2	61.2493	5.71	13.6	269	4.3	0.9	58	38	34	10	164	93	52	61	15	0.72	89	0	0	0	1	1	0	0	0	0	0	145.3	45.9	71	87	21.8	0	105	68	10.7	23.3115	0	60.7	0	0	0		6	5.3	0.04
479	2	43.9068	6.1	13.6	391	4.5	0.6	66	26	28	26	215	139	64	63	8	0.66	83	1	0	0	0	0	0	0	0	0	0	159.2	77.2	89	116	30.5	1	103	74	18	23.3161	0	110.5	1	0	1		5.5	5.7	0.56
480	1	41.9397	7.2	15.2	297	4.5	1.2	77	47	98	35	234	166	124	43	15	0.84	99	1	0	1	0	0	0	0	0	0	0	170.8	93.7	106.5	110	32.1	1	149	110	23.93	25.539	1	211.8	1	0	0		5.5	4.1	0.12
481	1	41.6082	7.46	15.9	323	4.2	0.8	74	28	62	146	208	122	207	45	12	0.77	105	1	0	1	0	0	0	1	1	0	1	168.4	115.1	121	118	40.6	1	152	106	29.43	25.5691	1	181.6	1	0	0		6.1	6.9	0.52
482	2	55.1397	7.04	13.2	333	4.4	0.5	86	17	17	23	230	139	123	66	20	0.77	90	0	0	0	0	0	0	0	0	0	0	148.7	60.4	86	96	27.3	1	124	88	14.09	23.3278	0	115.4	1	0	0		6	5.5	0.6
483	2	29.8603	5.3	12.9	243	4.1	0.8	54	14	8	7	190	102	42	80	9	0.59	90	0	0	0	0	0	0	0	0	0	0	151	50.7	74.5	90	22.1	0	105	73	11.83	23.3333	0	49.5	0	0	1		5.3	3.8	0.08
484	2	67.4822	4.42	12.4	205	4.3	1	113	30	21	8	194	132	47	53	11	0.76	98	1	0	0	0	0	0	0	0	0	0	155	65.4	99.5	97.5	27.3	1	116	80	15.26	23.3333	0	120.8	1	0	0		5.8	4	0.06
485	2	69.4219	5.45	14.8	161	4.3	1	52	27	30	18	133	61	112	50	18	1.01	120	1	1	1	0	0	0	1	1	1	0	157.4	65.6	96	96	26.5	1	115	78	15.31	23.3384	0	123.9	1	0	0		6.2	5.7	0.03
486	2	59.7863	4.85	13.4	174	4.2	0.9	78	23	20	20	179	99	139	52	10	0.58	87	0	0	0	0	0	0	0	0	0	0	154.3	53	87	95	22.3	0	98	71	12.37	23.3396	0	73.1	0	0	0		5.4	4.7	0.11
487	2	54.5151	5.84	12.8	346	4	0.7	128	23	47	48	228	102	180	90	22	0.39	150	1	0	0	0	1	0	1	1	0	1	160.9	63.7	90	100	24.6	0	114	85	14.87	23.3438	0	114.7	1	0	0		6.8	0.1	0.16
488	2	39.8822	5.06	13.3	268	4.3	0.9	52	16	9	7	169	97	76	57	11	0.61	94	1	0	0	0	0	0	0	0	0	0	159.1	66	88	101	26.1	1	107	77	15.42	23.3636	0	118.5	1	0	0		5.2	4.1	0.11
489	2	57.8685	6.1	14.8	269	4.2	1.2	129	23	18	10	205	120	49	75	19	0.57	73	0	0	0	0	0	0	0	0	0	0	152.6	52.9	82	94	22.7	0	121	83	12.36	23.3648	0	87.2	0	0	1		5	5.6	0.09
490	2	74.4082	4.4	10.1	171	4.5	0.7	114	108	74	107	84	34	75	35	18	1.27	119	0	1	1	1	1	1	0	1	0	0	148.4	41.6	78	88	18.9	0	105	54	9.72	23.3654	0	77.6	0	0	0		5.4	6.1	0.04
491	2	42.2685	8.72	12.3	274	4	0.8	81	27	44	34	229	148	121	57	12	0.53	99	1	0	0	0	0	0	0	0	0	0	159.2	85.5	101	111.5	33.8	1	116	78	19.98	23.3684	0	172.9	1	0	0		6.1	4.9	0.95
492	2	37.1507	5.43	13.5	321	4.2	0.8	61	26	25	9	232	140	90	74	8	0.66	89	1	0	0	0	0	0	0	0	0	0	167.9	86.9	99	115.5	30.8	1	130	87	20.31	23.3717	0	155.1	1	0	0		5.3	5.1	0.24
493	2	57.2438	4.95	11.9	227	4	1	72	20	21	27	180	99	64	68	11	0.76	82	1	1	1	0	0	0	0	0	0	0	162	77.4	95	110	29.5	1	121	74	18.09	23.3721	0	121.9	1	0	0		5.5	4.7	0.26
494	2	61.3644	4.26	14.3	257	4.2	1.1	65	18	15	11	214	134	85	63	15	0.66	106	0	0	0	0	0	0	0	0	0	0	159.6	53.6	83	93	21	0	96	63	12.53	23.3769	0	110.5	1	0	1		5.5	4.9	0.02
495	2	77.3068	4.92	12.5	244	4.2	0.6	67	28	30	31	177	90	44	78	11	0.59	95	0	1	1	0	0	0	0	0	0	0	150.6	52.7	87	99	23.2	0	133	60	12.32	23.3776	0	75.9	0	0	1		5.3	3.8	0.03
496	2	60.2767	4.23	14.5	255	4.3	0.8	49	19	24	10	187	127	91	42	22	0.5	176	0	0	0	1	1	1	1	1	1	0	159	58.8	87	90	23.3	0	97	66	13.75	23.3844	0	102.9	1	0	0		7.7	4.2	0.09
497	2	75.0384	4.38	11.1	341	4.2	0.9	65	23	21	19	192	110	80	66	16	0.68	91	1	1	1	0	0	0	1	1	1	0	147.6	49.6	89	92	22.8	0	111	68	11.6	23.3871	0	64.1	0	0	0		5.4	3.8	0.06
498	2	78.6877	5.31	13.2	127	4	0.7	64	23	19	16	206	126	180	44	12	0.66	110	0	0	0	0	0	1	1	1	1	1	154.1	55.8	85	93	23.5	0	104	66	13.05	23.3871	0	91.7	0	0	0		5.9	3.3	0.11
499	2	45.5726	4.8	12.8	303	4.4	0.9	49	21	9	14	192	106	81	70	9	0.61	91	0	0	0	0	0	0	0	0	0	0	151	55.5	76	96	24.3	0	102	72	12.98	23.3874	0	91.5	0	0	1	6.3	5.2	3.3	0.06
500	2	63.5616	5.69	13.1	260	4.3	0.9	65	27	20	12	223	138	238	37	10	0.74	82	0	1	1	0	0	1	1	1	1	1	152	58	84.5	88	25.1	1	121	89	13.57	23.3966	0	137.7	1	0	1		5.5	5.2	0.04
501	2	64.6301	8.08	14.4	145	4.3	1.3	147	132	157	157	196	129	130	41	16	0.58	154	0	1	1	0	1	1	0	1	0	0	152.5	55.9	80	93	24.2	0	138	95	13.08	23.3989	0	112.8	1	0	1		8.7	4.4	0.46
502	1	41.1342	11.74	20	227	4.2	1.1	101	47	41	145	213	89	434	37	10	0.57	208	1	0	1	0	1	1	1	1	0	1	176.2	105.6	109	111	34	1	149	104	27.07	25.6345	1	197.8	1	1	1		10.5	6.3	1.51
503	2	67.9041	4.39	11.9	240	4.2	1	76	62	79	26	142	56	266	33	17	0.71	103	1	1	1	0	0	1	1	1	1	1	153.8	70.3	92	100	29.7	1	135	68	16.45	23.3997	0	165	1	0	0		5.8	4.7	0.06
504	2	73.0438	5.32	12.3	235	4.4	1.3	60	19	11	33	179	101	88	60	9	0.75	105	1	1	1	0	0	0	0	0	0	0	161	71.1	96	99	27.4	1	133	71	16.64	23.4037	0	150	1	0	0		6.2	6.8	0.12
505	2	61.3096	4.47	13.9	268	4.6	0.9	78	26	20	14	240	162	50	68	10	0.67	83	0	0	0	0	0	0	0	0	0	0	147.1	47	83	91	21.7	0	97	71	11	23.4043	0	85	0	0	0		5.3	3.2	0.19
506	1	45.3452	5.92	16.2	197	4.1	1.8	80	124	122	60	207	120	102	67	13	0.79	162	1	1	1	0	1	0	0	0	0	0	171.2	104.2	111	114	35.6	1	166	120	26.73	25.6526	1	215.1	1	0	1		6.7	5.1	0.32
507	2	59.5096	5.62	13.6	344	4.3	0.8	92	51	54	32	227	164	100	43	14	0.58	98	1	0	1	0	0	1	0	1	0	0	156.2	72.8	99	101	29.8	1	132	98	17.04	23.4066	0	142.3	1	0	1		5.8	3.9	0.49
508	2	64.0219	4.3	13.8	254	4.2	0.9	93	24	18	76	246	158	181	52	10	0.52	107	0	1	1	0	0	0	1	1	1	1	149.1	57.7	80	101	26	1	134	100	13.51	23.4142	0	97.4	0	0	1		5.2	3.1	0.11
509	2	40.5589	6.3	13.8	320	4.2	0.7	149	29	21	15	154	92	69	48	11	0.47	98	0	0	0	0	0	1	0	1	0	0	155.1	57.4	80	97	23.9	0	128	73	13.44	23.4146	0	87.8	0	0	0		5.5	5.4	0.34
510	1	37.2904	9.02	17.9	284	4.8	1.2	84	95	80	473	252		901	44	11	0.57	158	1	0	1	0	1	0	1	1	0	1	182.5	105.5	115	111	31.7	1	152	105	27.07	25.6588	1	177.1	1	1	1		8.8	7	0.37
511	2	57.8411	4.12	15.7	229	4.3	0.8	73	28	22	10	237	165	56	61	12	0.59	86	0	0	0	0	0	0	0	0	0	0	149.3	58.7	80	103	26.3	1	111	75	13.75	23.4242	0	90.1	0	0	0		5.5	4.8	0.03
512	2	59.074	4.71	12.8	243	4.1	0.8	51	21	40	24	231	113	116	95	18	0.77	85	0	1	1	0	0	0	0	0	0	0	156.2	58.1	87	88.5	23.9	0	130	83	13.61	23.4251	0	165.4	1	0	0		6.2	4	0.15
513	2	74.5315	4.57	12.7	238	4.1	1	53	31	25	16	247	176	160	39	13	0.6	86	1	1	1	0	0	1	1	1	0	1	155.3	68.3	90	101	28.3	1	117	72	16	23.4261	0	122.1	1	0	0		5.8	6.9	0.12
514	2	54.274	6.32	14.5	319	4.8	0.8	57	19	27	28	158	81	123	52	17	0.76	170	0	0	0	1	1	0	1	1	1	0	153.6	62.1	83	93	26.2	1	135	82	14.55	23.43	0	142.3	1	0	0		7.6	4.7	0.02
515	1	44.5863	14.61	17.4	418	4.4	1.2	45	46	82	61	141	72	147	40	20	1.25	176	1	1	1	1	1	0	1	1	1	0	171.8	100	107	110	33.9	1	139	81	25.67	25.67	1	197.5	1	0	0		8.1	2.8	0.4
516	2	73.4685	4.78	13.5	223	4.4	0.8	105	23	13	10	157	80	136	50	10	0.73	95	0	1	1	0	0	0	0	0	0	0	155.3	54.2	81	94	22.5	0	128	74	12.7	23.4317	0	100.6	1	0	0		5.6	5	0.05
517	2	55.7315	5.19	13.6	239	4.4	0.7	97	21	14	10	188	96	48	82	14	0.62	101	0	0	0	0	0	0	0	0	0	0	159.9	69.3	83	102	27.1	1	125	84	16.24	23.4343	0	114	1	0	0		6.1	3.7	0.08
518	2	63.0384	6.62	14.7	315	4.3	0.6	72	20	16	18	199	127	115	49	17	0.55	124	0	0	0	0	0	1	0	1	0	0	149.5	54.1	82	95	24.2	0	115	81	12.68	23.4381	0	112.4	1	0	0		6	3.5	0.03
519	2	37.3726	4.94	9.1	299	4.4	0.8	57	18	13	18	109	28	64	68	10	0.59	83	0	0	0	0	0	0	0	0	0	0	151.5	56.4	84	100	24.6	0	100	74	13.22	23.4397	0	90.9	0	0	1		5	5.4	0.03
520	2	27.9288	8.01	15.3	307	4.6	1.1	76	15	26	117	251	144	273	52	11	0.56	106	1	0	0	0	0	0	1	1	0	1	154.8	68.3	98	106	28.5	1	107	73	16.01	23.4407	0	92.4	0	1	1		5.4	6.3	0.18
521	2	69.5644	9.05	13.7	335	4.5	0.7	97	16	27	26	128	39	213	46	13	0.59	116	1	1	1	1	1	1	1	1	1	1	153.8	62.1	91	90	26.3	1	151	84	14.56	23.4461	0	111.8	1	0	0		7	7.2	0.13
522	2	71.3123	7.37	13.2	227	4.4	0.7	57	16	12	12	139	62	144	48	13	0.69	107	1	0	0	0	0	1	1	1	1	0	151.1	54.8	90	98	24	0	105	56	12.85	23.4489	0	109	1	0	0		6.4	5.9	0.1
523	2	50.9397	3.44	14.7	231	4.6	1.4	67	21	11	11	246	162	69	70	10	0.64	88	0	0	0	0	0	0	0	0	0	0	156.1	53.9	75.5	93.5	22.1	0	98	74	12.64	23.4508	0	98.6	0	0	1		4.8	4	0.02
524	2	76.6274	3.09	12.9	158	4.4	1	61	65	42	10	154	87	37	60	18	0.79	76	0	1	1	0	0	0	1	1	1	0	145	47.5	73	86	22.6	0	108	65	11.14	23.4526	0	63.2	0	0	0		5.4	4.6	0.04
525	2	66.789	4.32	12.5	248	4.1	0.7	51	59	52	39	174	108	80	50	12	0.77	85	0	0	0	0	0	0	1	1	1	0	147.8	53	81	91	24.3	0	128	67	12.43	23.4528	0	115.8	1	0	0		5.1	4.7	0.04
526	2	60.2904	4.99	14.4	368	4.6	0.6	73	50	54	25	187	101	208	44	15	0.68	112	1	0	0	1	1	1	1	1	1	1	154.6	69.7	93	101	29.2	1	112	80	16.35	23.4577	0	170.6	1	0	0		7.3	5.1	0.33
527	2	58.9233	5.76	12.5	290	4.2	1.4	95	27	14	10	247	171	51	66	11	0.73	90	0	0	0	0	0	0	0	0	0	0	155.2	61.7	84	96	25.7	1	105	66	14.48	23.4684	0	93.1	0	0	1		5.7	5.1	0.12
528	2	61.0685	4.8	14.4	227	4.6	0.8	82	51	61	10	124	41	49	73	14	0.77	104	1	1	1	0	0	0	1	1	1	0	155.2	59.6	92	93.5	24.8	0	116	81	13.99	23.4732	0	132	1	0	1		6	4.7	0.05
529	2	53.5808	5.25	14.6	279	4.4	0.7	63	26	24	24	220	110	347	41	13	0.81	96	0	0	0	0	0	1	1	1	0	1	143.7	48.3	80	85	23.4	0	136	88	11.34	23.4783	0	92.4	0	0	0		5.4	5.3	0.14
530	2	73.4192	6.11	13.4	339	4.1	0.8	71	45	55	28	218	110	319	44	12	0.69	93	1	0	0	0	0	1	1	1	1	1	150.4	61.8	90	91	27.3	1	92	70	14.51	23.479	0	94.8	0	0	0		6	4.8	0.18
531	2	49.6493	4.59	11.6	243	4.3	0.9	74	36	50	34	196	131	82	49	16	0.72	92	1	0	0	0	0	1	0	1	0	0	148.8	61.8	88	106	27.9	1	98	63	14.51	23.479	0	109.5	1	0	0		6	5.1	0.15
532	1	34.1014	4.67	18.1	189	4.5	1.8	76	60	122	48	232	165	121	43	16	1.09	95	0	0	0	0	0	0	0	0	0	0	150.2	64.9	89	95	28.8	1	117	88	16.68	25.7011	1	95.1	0	0	0		5	5.3	0.04
533	2	67.5178	5.09	12.6	298	4.3	1	96	25	23	17	172	102	47	61	15	0.54	115	1	1	1	0	0	0	0	0	0	0	162.4	74.4	98	108	28.2	1	152	78	17.47	23.4812	0	142.6	1	0	0		6.3	2.8	0.09
534	2	57.3616	6.08	14.5	242	4.4	0.7	95	29	25	18	227	157	67	57	15	0.67	89	0	0	0	0	0	0	0	0	0	0	151.8	56.5	82.5	91.5	24.5	0	118	84	13.27	23.4867	0	93.9	0	0	0		5.7	4.7	0.09
535	2	72.726	8.68	12.6	280	4.3	0.7	70	32	23	20	203	106	144	68	16	0.72	103	0	1	1	0	0	0	1	1	1	0	156.6	67.1	85.5	94	27.4	1	129	84	15.76	23.4873	0	127.7	1	0	1		5.9	5.7	0.54
536	2	58.5562	6.92	14	300	4.4	0.7	70	27	31	30	165	72	248	43	11	0.54	93	1	1	1	0	0	1	1	1	1	1	154.3	72.2	95	107	30.3	1	123	73	16.96	23.4903	0	117.3	1	0	0		5.3	4	0.17
537	2	76.6658	9.99	14.2	283	4.5	0.9	66	25	23	44	252	172	73	65	15	0.48	88	1	0	1	0	0	0	0	0	0	0	159.2	69.9	96	99	27.6	1	154	99	16.42	23.4907	0	200.8	1	0	0		5.7	6.2	0.13
538	2	56.6055	6.22	14.7	306	4.6	1	63	40	30	39	253	155	199	58	7	0.65	99	0	0	0	0	0	0	1	1	0	1	152.2	52.7	78	90	22.7	0	115	85	12.38	23.4915	0	86.3	0	0	1		5.1	4.3	0.05
539	2	74.3589	3.89	13.7	271	4.2	1.1	93	26	18	17	215	141	73	59	11	0.53	98	0	0	0	0	0	0	0	0	0	0	154.5	54.4	86	98	22.8	0	113	61	12.78	23.4926	0	112.3	1	0	0		5.5	4	0.13
540	2	34.9068	7.96	13.7	231	4.7	1.1	72	36	40	32	230	141	122	65	10	0.74	93	1	0	0	0	0	0	0	0	0	0	159.7	71	92	106	27.8	1	123	89	16.68	23.493	0	121.1	1	0	0		5.2	4.6	0.46
541	1	51.6301	7.9	17.2	209	4.3	1.2	67	33	58	56	191	111	242	32	20	1.06	164	1	1	1	0	1	1	1	1	0	1	161.5	90.9	107	108	34.9	1	115	80	23.37	25.7096	1	174	1	1	1		7.9	6.8	0.08
542	2	57.9288	7.26	13.9	348	4.3	1	36	38	41	12	166	94	81	56	17	0.65	97	0	0	0	0	0	0	1	1	1	0	148.8	48.9	76	86	22.1	0	88	68	11.49	23.4969	0	91.7	0	0	1		5.8	3.1	0.02
543	2	57.6027	4.52	14	175	4.4	0.7	74	30	31	19	215	127	73	73	17	0.62	81	1	0	0	0	0	0	1	1	1	0	151.1	51.1	88	94	22.4	0	94	70	12.01	23.5029	0	83.9	0	0	0		5.4	3.4	0.03
544	2	77.3836	5.45	15	257	4.1	1	55	26	26	18	175	83	243	43	12	0.53	100	1	1	1	0	0	1	1	1	1	1	149	58.8	92	94	26.5	1	161	90	13.82	23.5034	0	118.7	1	0	0		5.5	5	0.13
545	2	78.5534	4.79	12.1	173	4.2	0.8	75	30	25	24	215	136	74	64	22	1.23	79	0	0	0	0	0	0	0	0	0	0	152.9	51.6	86	94	22.1	0	106	57	12.13	23.5078	0	78.1	0	0	0		5.9	1.9	0.05
546	2	65.8521	4.82	13.3	363	4.4	1.3	48	26	19	31	197	107	65	77	13	0.67	104	1	1	1	0	0	0	1	1	1	0	152.2	57.8	90	85	25	1	116	76	13.59	23.5121	0	109.9	1	0	1		6.2	4.5	0.09
547	2	66.3616	5.28	13.7	244	4.2	1.2	78	20	18	13	156	77	69	65	17	0.65	115	1	1	1	0	0	0	1	1	1	0	158.2	64	91	98	25.6	1	121	76	15.05	23.5156	0	124.8	1	0	0		5.9	4.2	0.06
548	2	75.7973	5.32	12.9	217	3.9	0.8	75	32	30	33	192	124	131	42	16	0.63	80	0	0	1	0	0	1	0	1	0	0	151.2	54.3	84	89	23.8	0	124	93	12.77	23.5175	0	105.8	1	0	0		5.6	3.7	0.03
549	1	53.9425	11.83	16.4	298	4.2	0.9	102	28	33	46	179	102	165	44	12	0.93	102	1	0	1	0	0	0	1	1	1	1	179.2	114.7	119	116	35.7	1	124	93	29.49	25.7105	1	214.1	1	1	0		6.2	5.1	0.33
550	2	37.6411	5.32	13.4	378	4.4	0.8	36	17	7	7	255	146	59	97	10	0.76	99	0	0	0	0	0	0	0	0	0	0	156.9	59.6	79	99	24.2	0	105	84	14.02	23.5235	0	91.7	0	0	1		5.1	4.4	0.02
551	2	53.6137	3.99	13.5	241	4.3	0.7	54	18	13	13	249	160	182	53	13	0.8	105	0	0	1	0	0	0	1	1	1	1	153.1	68.1	82	101	29.1	1	123	91	16.02	23.5242	0	107.6	1	0	0		5.9	3.3	0.3
552	2	43.6575	5.33	12.8	384	4.1	0.8	137	20	23	13	203	137	95	47	12	0.7	90	1	0	0	0	0	1	0	1	0	0	159.6	79.6	104	111	31.1	1	122	84	18.73	23.5302	0	150.8	1	0	0		5.5	7.8	1.05
553	2	61.3671	4.43	13	189	3.9	1.1	71	30	20	28	180	124	72	42	15	0.49	96	1	0	0	0	0	1	0	1	0	0	151.2	59.2	89	91	26	1	132	80	13.93	23.5304	0	127.7	1	0	1		5.4	5.3	0.03
554	1	81.7671	6.02	14.4	161	4.5	1.3	81	16	13	30	146	75	51	61	14	1.01	84	1	1	1	0	0	0	1	1	1	0	164.2	75.2	105	96	27.9	1	136	93	19.36	25.7447	1	168.9	1	0	0		5.8	7.5	0.07
555	2	62.0164	5.62	13.4	314	4.3	1	130	22	15	15	222	160	71	48	11	0.63	111	1	1	1	0	0	1	0	1	0	0	144.6	58.9	95	98	28.2	1	132	74	13.86	23.5314	0	117.9	1	0	0		6.4	5.3	0.2
556	2	68.5425	6.29	14.4	220	4.2	1.1	40	152	155	31	142	63	130	53	12	0.88	91	0	0	0	0	0	0	1	1	1	0	155.6	62	86	91	25.6	1	113	72	14.59	23.5323	0	141.3	1	0	0		6.1	3.8	0.1
557	1	26.4493	6.51	17.4	365	4.8	1.2	76	102	238	39	118	62	114	33	9	0.77	78	1	0	1	0	0	1	0	1	0	0	167.3	87.3	110	112	31.2	1	151	111	22.5	25.7732	1	142.2	1	0	0		5	7	0.39
558	2	62.8658	6.43	13.5	313	4.3	0.8	71	24	22	9	167	97	58	58	14	0.54	96	0	0	0	0	0	0	0	0	0	0	150.9	56.9	81	96	25	1	108	81	13.39	23.5325	0	100.2	1	0	0		5.8	3.4	0.15
559	2	62.1014	4.62	14.5	262	4.2	0.8	106	22	16	14	291	215	83	59	12	0.67	99	0	0	0	0	0	0	0	0	0	0	159.4	68.2	84	104	26.8	1	87	64	16.05	23.5337	0	109.9	1	0	1		6	4.8	0.34
560	2	79.5068	5.16	15.4	233	4.1	0.7	83	26	22	13	144	56	93	69	10	0.6	90	0	0	0	0	0	0	1	1	1	0	156	51.2	86	92	21	0	126	82	12.05	23.5352	0	80.8	0	0	0		5.7	3.2	0.08
561	2	34.7425	4.97	13.2	338	4.1	0.8	54	15	15	8	188	111	57	66	10	0.72	96	1	0	0	0	0	0	0	0	0	0	149.6	59.1	96	101	26.4	1	88	64	13.91	23.5364	0	72.4	0	0	0		5.3	4.1	0.1
562	2	62.0192	3.46	12.3	266	4.1	0.4	61	23	14	13	171	88	236	36	12	0.59	97	0	0	0	0	0	1	1	1	0	1	147.8	56.7	80	92	25.9	1	109	70	13.35	23.545	0	111.3	1	0	0		6.2	4.1	0.04
563	1	62.389	3.3	15.3	164	4.5	1.5	86	29	46	27	200	137	57	52	14	0.88	103	0	1	1	0	0	0	0	0	0	0	157.6	77.6	95	99	31.2	1	130	100	20.02	25.799	1	146.2	1	0	1		5.5	5.7	0.09
564	2	71.9507	7.58	13.6	233	4.4	1	66	32	34	14	191	123	42	60	14	0.76	113	1	1	1	0	0	0	0	0	0	0	153.8	62.9	91	94	26.5	1	124	78	14.81	23.5453	0	119	1	0	0		6	5.2	0.18
565	2	31.1726	8.32	15.2	310	4.4	0.8	73	24	26	23	266	135	236	84	13	0.66	76	1	0	0	0	0	0	1	1	0	1	158.4	70.5	93	103	28.1	1	113	83	16.6	23.5461	0	102.6	1	1	1		5.2	4.4	0.07
566	2	46.0959	6.05	13.7	281	4.1	0.9	70	23	24	29	210	144	153	35	15	0.73	108	1	1	1	0	0	1	1	1	0	1	155.7	73.6	94.5	105	30.2	1	153	95	17.33	23.5462	0	109	1	0	0		5.9	5.8	0.29
567	1	55.2137	7.78	15.3	221	4.2	1.3	98	38	60	54	168	107	91	43	13	0.55	73	1	1	1	0	0	0	0	0	0	0	161.2	80.3	105	111	30.9	1	146	92	20.74	25.8281	1	137.6	1	0	0		5.5	5.7	0.48
568	2	54.2493	5.27	13.6	195	4.3	0.8	73	21	23	88	229	155	126	49	11	0.67	98	0	0	0	0	0	1	0	1	0	0	152.4	55.5	85	98	23.9	0	85	61	13.07	23.5495	0	97.6	0	0	0		6	5.7	0.11
569	2	47.5041	5.45	14.5	361	4.5	0.9	43	22	16	16	251	139	60	100	14	0.75	85	0	0	0	0	0	0	0	0	0	0	151.4	50.7	75	88	22.1	0	104	84	11.94	23.5503	0	85.8	0	0	1		4.9	3.9	0.04
570	2	35.5014	9.9	16	332	5.1	1	73	31	40	46	167	62	262	53	11	0.55	83	0	0	0	0	0	0	1	1	0	1	152.9	54.9	87	95	23.5	0	109	77	12.93	23.5519	0	87.9	0	1	1		5.4	5.4	0.15
571	2	62.5425	7.88	13.1	298	4.3	0.4	65	46	27	52	187	86	251	51	15	0.7	132	1	1	1	1	1	0	1	1	1	1	160.5	72	97	99	28	1	117	80	16.96	23.5556	0	141.6	1	0	0		6.6	4.1	0.1
572	1	39.3041	7.66	15.9	231	4.7	1.5	149	22	45	91	225	134	276	36	11	0.68	113	1	0	0	0	0	1	1	1	0	1	171.7	91.3	106	106	31	1	131	79	23.62	25.8708	1	183.5	1	1	0		5.7	5.2	0.68
573	1	30.274	5.82	16.1	184	4.5	1.4	63	31	65	25	209	131	193	39	9	0.76	87	1	0	1	0	0	1	1	1	0	1	180.6	116.2	118	123	35.5	1	143	85	30.07	25.8778	1	247.7	1	1	0		5.8	6.2	0.34
574	2	48.0658	5.36	13.5	269	3.7	0.6	81	28	23	17	143	83	124	35	13	0.73	101	1	0	0	0	0	1	0	1	0	0	159.3	74.5	94	110	29.8	1	133	81	17.55	23.557	0	129	1	0	0		5.7	5	0.16
575	2	32.9945	5.85	13.8	261	4.9	1	66	26	19	14	262	166	52	86	11	0.68	73	0	0	0	0	0	0	0	0	0	0	152.3	53.4	73	91	23	0	105	76	12.58	23.5581	0	78	0	0	1		5.1	4.9	0.04
576	2	58.9014	5.04	14.5	226	4.5	0.9	73	35	35	30	202	124	197	39	11	0.71	109	1	0	0	0	0	1	1	1	0	1	151.6	61.2	88	100	26.6	1	106	74	14.42	23.5621	0	100.2	1	0	0		5.4	4.7	0.03
577	2	54.4247	4.76	14.7	235	4.7	1.4	74	32	39	21	263	176	194	48	9	0.58	117	0	0	0	1	1	1	1	1	0	1	150.8	56.7	85	86	24.9	0	112	74	13.36	23.5626	0	92.9	0	0	0		6.7	5.6	0.04
578	2	74.8849	7.67	12.8	241	4.3	0.8	63	15	14	21	132	61	91	53	17	0.73	123	0	1	1	1	1	0	1	1	1	0	152.1	54.9	75	90	23.7	0	127	80	12.94	23.5701	0	93.7	0	0	0		6.8	4.4	0.09
579	2	63.1534	6.05	14	206	4.4	1.4	71	47	46	22	168	100	127	43	15	0.73	131	0	1	1	1	1	1	0	1	0	0	155	58.8	87	96	24.5	0	119	77	13.86	23.5714	0	98.8	0	0	0		6.4	6	0.12
580	2	55.611	5.55	14	258	4.2	0.7	84	28	30	20	237	163	108	52	10	0.56	111	0	1	1	0	0	0	0	0	0	0	154.7	65.8	87	105	27.5	1	118	75	15.51	23.5714	0	104.6	1	0	0		6	3.4	0.25
581	1	35.6767	7.01	14.8	236	4.5	1.2	39	40	74	45	196	130	160	34	11	0.94	87	1	0	0	0	0	1	1	1	0	1	179.2	106.3	108	117	33.2	1	138	82	27.51	25.8796	1	196.9	1	0	1		6.2	8.3	0.36
582	2	36.3151	5.3	13.3	176	4.5	2.6	60	52	40	40	224	138	57	75	8	0.59	97	1	1	1	0	0	0	0	0	0	0	156.7	69	96	93	28	1	144	106	16.27	23.5797	0	106.4	1	0	1		5.4	3.5	0.19
583	2	64.1014	5.16	14	226	4.4	0.5	87	31	12	18	244	170	66	61	11	0.61	98	0	1	1	1	1	0	0	0	0	0	150.8	50	77	88	21.9	0	105	72	11.79	23.58	0	82.9	0	0	0		6.1	4	0.09
584	2	51.1507	7.09	13.5	332	4.1			17	17	60	197	117	199	40		0.73	103	1	0	0	0	0	1	1	1	0	1	159.4	96.6	108	124	38	1	135	85	22.78	23.5818	0	125.4	1	0	0		6.5		0.5
585	2	64.2192	3.9	13.8	211	3.9	0.9	80	22	17	16	197	129	94	49	13	0.65	91	0	0	0	0	0	1	0	1	0	0	149.5	55.8	80.5	93	24.8	0	115	79	13.16	23.5842	0	78.8	0	0	0		6	3.4	0.02
586	2	66.2137	5.62	14.4	180	4.3	1.1	78	28	27	19	187	104	116	60	13	0.53	106	0	0	0	0	0	0	1	1	1	0	141.7	54.3	83	89	26.9	1	129	83	12.81	23.5912	0	100.3	1	0	1		6.7	4.5	0.05
587	2	55.1699	4.83	14.4	159	3.9	0.7	89	42	49	24	186	117	71	55	14	0.75	81	1	0	0	0	0	0	0	0	0	0	149.2	60.1	90	93	27.1	1	113	85	14.18	23.594	0	99	0	0	0		5.6	4.3	0.23
588	2	59.5425	5.78	12.1	206	4.4	0.7	75	28	30	29	178	106	102	52	19	0.51	96	0	0	1	0	0	0	1	1	1	0	149	59.8	86	96	26.9	1	130	93	14.11	23.5953	0	98.9	0	0	0		5.9	3.7	0.1
589	2	68.6822	4.63	13.9	243	4.4	1.2	74	44	18	21	206	121	74	70	16	0.63	95	1	1	1	0	0	0	1	1	1	0	147.3	52.8	89	90	24.3	0	115	76	12.46	23.5985	0	80.7	0	0	0		5.7	4.3	0.05
590	2	47.4082	3.6	10.7	204	4.2	0.6	64	26	19	16	191	103	73	73	10	0.64	93	1	0	0	0	0	0	0	0	0	0	165	64.7	95	102	23.8	0	106	74	15.27	23.6012	0	118.3	1	0	0		5.4	3.3	0.07
591	2	42.0466	7.79	11.8	336	4.5	1.1	116	64	70	31	243	172	86	54	9	0.5	173	1	0	1	0	1	0	0	0	0	0	153.2	70.8	91	102	30.2	1	169	106	16.71	23.6017	0	105.5	1	0	0		6.9	4.2	0.22
592	2	47.3973	7.88	14.2	343	4.6	0.9	64	13	15	24	214	144	66	57	16	0.69	98	0	0	1	0	0	0	0	0	0	0	155.1	69.1	84.5	103.5	28.9	1	133	93	16.31	23.6035	0	121.4	1	0	0		5.6	6.3	0.37
593	2	67.8137	4.32	13	280	4.3	0.8	70	21	9	11	207	136	69	57	13	0.69	77	1	1	1	0	0	0	0	0	0	0	154.3	59.3	90	95	24.9	0	124	85	14	23.6088	0	97.3	0	0	0	8.6	5.2	5.8	0.1
594	2	66.3589	4.3	12.8	224	4.6	1.4	49	23	21	17	231	154	63	64	12	0.85	92	1	0	0	0	0	0	0	0	0	0	159	67.6	97	98	26.7	1	127	72	15.96	23.6095	0	134.4	1	0	0		5.5	4.2	0.03
595	2	41.5781	10.87	15	210	4.7	1	92	90	108	114	220	124	265	43	11	0.77	255	1	1	1	1	1	1	1	1	0	1	154.8	101.6	117	119.5	42.4	1	143	92	23.99	23.6122	0	210.9	1	0	0		11	5.1	1.68
596	2	28.2055	7.35	13.1	354	4.6	1.3	69	25	29	19	201	112	140	61	10	0.85	76	1	0	0	0	0	0	0	0	0	0	153.8	68.6	97	96.5	28.9	1	109	75	16.2	23.6152	0	70	0	0	0		5.7	4.7	0.6
597	2	38.8164	6.47	14.7	267	4.1	1	64	206	224	63	276	208	128	42	9	0.61	103	1	0	1	0	0	1	0	1	0	0	164.6	89.6	103	108	33.1	1	165	115	21.17	23.6272	0	180.9	1	0	0		5.4	6.1	0.51
598	1	26.8685	8.02	15.6	321	4.1	0.9	100	37	68	51	160	98	95	43	10	0.86	84	1	0	0	0	0	0	0	0	0	0	166.1	84.1	103	110	30.5	1	113	80	21.79	25.9096	1	121.9	1	0	1		5.2	6.5	0.69
599	1	56.3123	6.74	15.9	195	4.6	1.1	57	30	36	57	285		509	42	14	0.86	124	0	1	1	0	0	0	1	1	0	1	172.5	87	94.5	102	29.2	1	130	97	22.55	25.9195	1	198.5	1	0	1		6.1	7.6	0.09
600	2	52.0164	5.59	13.8	314	3.9	0.6	79	22	22	18	263	171	140	64	11	0.54	93	1	0	0	0	0	0	0	0	0	0	157	67.5	98	105	27.4	1	127	88	15.95	23.6296	0	99.2	0	0	0		5.5	3.7	0.5
601	2	44.7123	6.79	15.2	286	4.2	0.8	62	25	35	17	258	169	254	38	10	0.57	82	0	0	1	0	0	1	1	1	0	1	152.9	59.5	82	95	25.6	1	124	96	14.06	23.6303	0	128.4	1	0	0		5.4	5.7	0.44
602	2	68.8192	7.13	13.8	329	4.2	0.6	77	20	17	23	198	126	134	45	13	0.6	105	0	1	1	0	0	1	0	1	0	0	153.8	60.3	83	97	25.6	1	134	84	14.25	23.6318	0	85.8	0	0	0		6.1	4.6	0.1
603	2	54.7205	4.03	12.9	262	4.4	1	70	22	17	9	224	157	106	46	16	0.67	84	1	0	0	0	0	1	0	1	0	0	149.7	54.5	90	91	24.2	0	106	77	12.88	23.633	0	73.7	0	0	0		6	3.5	0.03
604	2	77.6466	4.72	13.1	215	4.1	1	56	19	17	11	144	67	82	61	7	0.7	112	1	1	1	1	1	0	0	0	0	0	154	61.6	95	96	26	1	156	85	14.56	23.6364	0	81.6	0	0	0		6	4	0.06
605	2	73.5753	8.31	14.6	273	4.4	0.7	97	24	39	19	212	143	143	40	21	1.24	100	1	1	1	0	0	1	0	1	0	0	151.8	63.8	90	94	27.7	1	137	83	15.08	23.6364	0	136.8	1	0	0		6.2	2.9	0.02
606	2	62.3534	9.64	12.5	419	4.5	0.5	89	16	15	31	247	170	190	39	14	0.8	135	1	1	1	0	1	1	1	1	0	1	154.5	63.2	88	92	26.5	1	99	68	14.94	23.6392	0	128.4	1	0	1		6	4.4	0.17
607	2	65.4932	6.41	13.3	246	3.9	1.7	82	23	18	17	181	105	162	44	14	0.65	102	1	0	1	0	0	1	1	1	0	1	157	71.9	93	101	29.2	1	141	87	17	23.6439	0	134.1	1	0	0		5.6	5.8	0.1
608	2	26.4521	6.4	13.9	313	4.3	0.6	58	21	14	9	157	76	64	68	9	0.53	83	0	0	0	0	0	0	0	0	0	0	153.7	52.2	77	87	22.1	0	100	64	12.35	23.659	0	70.2	0	0	1		5.3	5.4	0.06
609	2	60.9753	5.78	13	265	4.3	0.6	58	27	29	17	193	114	131	53	18	0.78	109	0	0	0	0	0	0	1	1	1	0	146.2	59.3	80	89	27.7	1	96	70	14.03	23.6594	0	92.9	0	0	0		6.2	4.6	0.07
610	2	64.0849	4.52	13.5	237	4.6	1.4	62	55	59	34	158	80	79	62	16	0.67	94	1	1	1	0	0	0	1	1	1	0	152.6	60.6	88	101	26	1	108	65	14.34	23.6634	0	93.1	0	0	1		5.6	6.2	0.19
611	2	66.8384	4.45	12.7	268	4.1	0.7	91	37	41	19	115	60	62	43	13	0.54	80	0	1	1	0	0	1	1	1	1	0	145.5	51.3	82	92	24.3	0	106	70	12.14	23.6647	0	106.9	1	0	1		5.8	4.6	0.08
612	2	58.5918	5.44	14	300	4.5	0.7	76	60	53	61	228	115	381	37	15	0.72	98	1	0	0	0	0	1	1	1	0	1	157.8	76.3	90	103	30.6	1	135	87	18.06	23.6697	0	129.2	1	0	0		5.9	6.3	0.65
613	1	53.0466	8.37	15.3	314	4.4	0.7	50	31	37	29	182	111	137	44	15	1.03	165	1	1	1	1	1	0	0	0	0	0	166.1	94.6	112	108	34.3	1	153	97	24.56	25.9619	1	163.8	1	0	0		8.7	5.9	0.29
614	2	72.989	6.19	12.7	299	3.8	0.4	67	20	18	70	249	140	295	50	28	1.52	190	1	1	1	1	1	0	1	1	0	1	149.3	59.4	88.5	94	26.8	1	180	108	14.06	23.67	0	125.3	1	0	0		7.3	8.6	0.14
615	2	56.4466	5.48	14.3	224	4.2	0.6	66	45	48	32	285	178	91	89	12	0.76	82	0	0	0	0	0	0	0	0	0	0	157.6	56.4	82	96	22.7	0	126	78	13.35	23.6702	0	102.8	1	0	0		5.9	7.6	0.53
616	2	35.1041	4.3	12.9	260	4.3	0.9	56	17	19	10	151	93	34	51	8	0.68	87	1	0	0	0	0	0	0	0	0	0	159.7	63.2	90	98	24.8	0	91	61	14.96	23.6709	0	79.7	0	0	1		4.9	4.4	0.02
617	2	48.5479	5.27	13.6	214	4.3	0.9	53	20	19	16	240	152	94	69	11	0.59	77	0	0	0	0	0	0	0	0	0	0	151.9	60.2	86	100	26.1	1	103	76	14.25	23.6711	0	85.3	0	0	0		5.4	4.6	0.12
618	1	64.0055	7.29	14.1	224	4.3	0.8	51	37	47	63	151	69	205	41	16	1.08	129	0	1	1	1	1	0	1	1	1	1	162.5	72.7	98	98	27.5	1	142	74	18.9	25.9972	1	150.2	1	0	1		6.6	7.7	0.06
619	2	73.1589	6.58	14.5	264	4.4	1	73	33	23	24	258	172	110	64	16	0.72	98	0	0	1	0	0	0	0	0	0	0	149.5	52.3	70	91	23.6	0	146	77	12.38	23.6711	0	125	1	0	0		5.8	4.2	0.04
620	2	43.0356	6.07	13.4	308	4.3	2	73	21	18	29	193	117	81	60	13	0.73	75	0	0	0	0	0	0	0	0	0	0	150.2	50.1	79	92	22.2	0	86	56	11.86	23.6727	0	77.7	0	0	1		5.1	5.3	0.15
621	2	60.2603	5.66	14.9	419	4.7	1.8	100	32	38	17	235	151	83	67	13	0.9	103	0	0	1	0	0	0	0	0	0	0	148.8	55.5	80	97	25.1	1	122	92	13.14	23.6757	0	102.5	1	0	0		5.3	7.6	0.08
622	2	57.6877	5.81	13.8	435	4.4	0.8	94	27	28	28	254	164	152	60	13	0.61	116	0	0	1	0	0	0	1	1	0	1	148.2	57.6	85	96	26.2	1	127	94	13.64	23.6806	0	100.9	1	0	0		5.8	4.3	0.2
623	2	54.2192	5.6	12.8	218	4.3	1.1	67	31	31	19	227	163	68	50	12	0.57	87	0	0	0	0	0	0	0	0	0	0	148.2	48.9	77	91	22.3	0	98	75	11.58	23.681	0	75.5	0	0	0		5.4	3.4	0.82
624	2	59.3425	4.69	14.3	251	4.3	0.7	97	33	38	20	297	224	165	40	9	0.59	108	1	0	1	0	0	1	1	1	1	1	154.9	61.9	93	94.5	25.8	1	131	107	14.66	23.6834	0	106.7	1	0	0		5.6	4.3	0.29
625	2	55.8438	4.37	13.3	265	4.1	1.2	50	29	26	37	199	123	82	60	13	0.46	84	1	0	0	0	0	0	0	0	0	0	153.8	63.8	89	97	26.9	1	126	85	15.11	23.6834	0	87.5	0	0	0		5.5	3.9	0.02
626	2	40.1233	9.62	13.6	198	4.3	0.3	99	42	63	58	230		476	36	6	0.7	90	1	0	0	0	0	1	1	1	0	1	165.1	82.8	98	106	30.4	1	121	80	19.61	23.6836	0	161.3	1	1	0		5.9	5.4	0.1
627	2	51.0027	7.53	13.9	279	4.3	0.8	80	20	18	32	257	180	110	55	12	0.53	96	0	0	0	0	0	0	0	0	0	0	155.6	62.7	80	95	25.8	1	107	76	14.85	23.6842	0	69.5	0	0	1		6	4.7	0.11
628	2	38.4027	5.57	11.6	327	4.3	0.5	63	15	17	21	221	127	134	67	6	0.65	92	1	0	0	0	0	0	0	0	0	0	158	69.1	90	100	27.7	1	137	89	16.3666	23.6854	0	97.0006	0	0	0		6.1	4.2	0.02
629	1	52.5644	7.38	15.3	237	4.6	0.9	77	41	60	56	231	157	113	51	15	0.97	124	1	0	0	0	0	0	0	0	0	0	162.5	78.5	103	101	29.5	1	120	76	20.41	26	1	131.2	1	0	0		7.2	7.1	0.22
630	2	37.4521	10.76	14.2	360	4.5	0.5	50	18	23	55	213	131	128	56	17	1.18	198	1	1	1	1	1	0	0	0	0	0	162.4	84.6	101	106	32.1	1	117	90	20.04	23.6879	0	129.8	1	1	1		9.2	6.9	0.29
631	2	75.9041	4.94	13.7	181	4.3	0.9	57	26	20	13	204	106	64	85	16	0.65	100	1	0	1	0	0	0	1	1	1	0	153.9	64.8	90	99	27.4	1	150	80	15.35	23.6883	0	90.5	0	0	0		5.6	4.2	0.05
632	2	71.0685	7.42	13.9	323	4.5	1.3	71	42	46	19	180	96	108	62	13	0.75	112	1	1	1	1	1	0	0	0	0	0	155	67.5	98	102	28.1	1	123	65	15.99	23.6889	0	125.1	1	0	1		6.5	5.3	0.54
633	2	57	3.54	15.3	270	4.1			67	88	27	230	165	62	53		0.64	106	1	0	1	0	0	0	0	0	0	0	152.8	72.9	94	105	31.2	1	133	91	17.27	23.69	0	96	0	0	0		5.9		0.05
634	2	33.8603	4.06	14.1	285	4.2	0.6	69	27	42	42	230	162	143	39	9	0.54	101	1	0	0	0	0	1	0	1	0	0	160.2	75.6	104	108	29.5	1	104	71	17.91	23.6905	0	149.3	1	0	1		5.2	3.9	0.1
635	2	63.2411	4.73	12.6	281	4.2	0.8	80	26	22	22	212	131	70	67	15	0.74	91	0	0	0	0	0	0	0	0	0	0	149.7	59.6	85	98	26.5	1	110	85	14.12	23.6913	0	128.3	1	0	0		5.6	4.6	0.17
636	2	47.0356	4.29	13.9	186	4.5	1.5	85	21	11	9	195	108	57	76	12	0.71	70	0	0	0	0	0	0	0	0	0	0	155.2	55.2	71	93	23	0	109	73	13.08	23.6957	0	85.9	0	0	1		5.3	6.6	0.11
637	2	59.6411	5.43	14.4	265	4.2	1.5	89	34	31	15	223	147	110	54	11	0.75	90	1	0	0	0	0	0	0	0	0	0	161.9	73.6	95	102	28.1	1	101	75	17.44	23.6957	0	141.8	1	0	0		5.6	4.8	0.17
638	2	62.8932	4.7	15	192	4.3	1.8	74	22	15	17	229	150	66	66	13	0.7	91	0	0	0	0	0	0	0	0	0	0	147.5	51.1	83.5	93	23.5	0	112	72	12.11	23.6986	0	100.2	1	1	1		5.8	4.9	0.07
639	2	62.0137	5.31	14	348	4.5	0.8	97	15	13	49	252	181	158	39	14	0.8	98	1	0	0	0	0	1	1	1	0	1	149.5	58.1	92	97	26	1	125	87	13.77	23.7005	0	128	1	0	0		5.9	4.9	0.56
640	2	30.5425	5.52	14.5	278	4.5	0.9	45	21	21	14	190	111	56	68	11	0.6	79	0	0	0	0	0	0	0	0	0	0	152.9	51.6	75	92	22	0	128	86	12.23	23.7016	0	75.7	0	0	0		5.1	5	0.05
641	2	20.8247	6.14	13.1	200	4.2	0.5	15	16	10	12	165	90	47	66	10	0.55	78	0	0	0	0	0	0	0	0	0	0	153.8	57	79.5	94	24	0	92	60	13.51	23.7018	0	53.9	0	0	1		4.8	4.1	0.12
642	2	68.5644	4.7	14.2	191	4.7	0.5	64	49	44	16	137	59	32	72	17	0.56	87	0	0	0	1	1	0	1	1	1	0	142.3	49.7	80	90	24.5	0	97	55	11.78	23.7022	0	85	0	0	0		7.2	4.1	0.06
643	2	65.389	3.73	14.9	248	4.3	1	69	24	17	20	235	137	52	88	15	0.67	93	0	0	0	0	0	0	0	0	0	0	156.9	60.5	83	97	24.6	0	109	77	14.34	23.7025	0	105.8	1	0	1		5.6	4.8	0.14
644	2	61.9753	5.35	12.7	231	4.5	0.8	92	19	29	33	184	101	115	60	15	0.6	170	1	1	1	1	1	0	1	1	1	0	159.9	75.6	95	103	29.5	1	149	72	17.9207	23.7047	0	132.427	1	0	0		7.3	5.5	0.03
645	2	53.7123	3.35	12.8	319	4.4	1.6	126	39	63	86	211	137	49	64	11	0.5	84	0	0	0	0	0	0	0	0	0	0	147.7	48.3	82	95	22.1	0	89	69	11.45	23.706	0	69.9	0	0	0		5.4	4.6	0.04
646	2	38.8055	4.78	13.6	218	4.2	0.9	85	29	23	67	245	157	121	64	14	0.63	104	1	0	0	0	0	0	0	0	0	0	160.6	73.9	97	106	28.5	1	129	88	17.52	23.7077	0	118.4	1	0	1		5.3	3.1	0.17
647	2	59.2712	6.18	13.9	305	4.8	0.6	75	26	30	19	202	134	109	46	17	0.79	92	1	0	0	0	0	1	0	1	0	0	155	60.1	90	100	25	1	107	78	14.25	23.7105	0	88.4	0	0	0		5.7	5.8	0.04
648	2	45.3041	5.81	14	222	4.2	1.3	79	19	32	14	190	124	90	48	8	0.61	96	1	0	0	0	0	1	0	1	0	0	159.7	69.8	93	101	27.4	1	116	75	16.55	23.7106	0	119.5	1	0	0		5.4	3.5	0.31
649	2	74.8356	5.28	13.7	184	4.1	0.7	86	26	17	21	170	107	128	37	16	0.77	104	1	1	1	0	0	1	0	1	0	0	148	55.5	91	88.5	25.3	1	139	88	13.16	23.7117	0	103.6	1	0	0		5.7	4.6	0.28
650	1	62.4849	6.49	16.2	306	4.6	0.8	55	80	35	140	138	79	78	43	13	0.88	123	1	1	1	1	1	0	0	0	0	0	164.5	90.8	110	111	33.6	1	123	85	23.62	26.0132	1	182.3	1	0	1		6	8	0.07
651	2	27.6137	7.65	14.8	285	4.4	0.7	53	20	17	14	185	113	123	47	11	0.61	95	1	0	0	0	0	1	0	1	0	0	162.4	79.2	94	102	30	1	110	72	18.78	23.7121	0	95.5	0	0	0		5.5	4.7	0.29
652	2	58.1205	5.03	14.1	313	4.6	1.3	81	27	25	40	236	151	68	71	16	0.58	80	1	0	1	0	0	0	0	0	0	0	153.8	54.4	89	96	23	0	138	92	12.9	23.7132	0	113.4	1	0	1		4.9	4.5	0.02
653	2	62.126	5.84	14.7	249	4.5	1.2	107	29	50	186	223	147	138	48	19	0.7	114	1	1	1	1	1	1	1	1	1	0	157.8	65.7	95	92	26.3	1	131	79	15.58	23.7139	0	127.5	1	0	0		6.7	5.7	0.13
654	2	33.1863	6.33	14.6	228	4.3	1.1	65	15	14	8	128	59	93	50	13	0.48	92	1	0	1	0	0	0	0	0	0	0	170.4	79.6	97	102	27.4	1	132	93	18.88	23.7186	0	138.1	1	0	0		4.5	4.2	0.05
655	1	68.0658	8.68	16.9	178	4.7	0.9	67	41	59	57	110	49	126	36	18	1.27	132	0	1	1	1	1	1	0	1	0	0	166.8	79.8	98	98	28.6	1	142	78	20.77	26.0276	1	188.1	1	0	0		7.9	6	0.17
656	2	27.2932	5.9	12.6	252	4.2	0.5	59	13	7	14	203	128	65	62	9	0.49	96	1	0	0	0	0	0	0	0	0	0	170.2	76.1	96	111	26.3	1	112	71	18.05	23.7188	0	113	1	0	1		4.9	4.9	0.16
657	2	60.7534	5.37	13.6	194	4.5	0.7	61	21	17	12	176	92	98	64	12	0.7	96	1	1	1	0	0	0	1	1	1	0	155.9	70.6	94	105	29	1	101	67	16.75	23.7252	0	138.2	1	0	0		5.7	5.7	0.09
658	2	53.8877	5.72	13	217	4.1	0.8	59	17	22	14	164	81	133	56	7	0.65	133	0	1	1	1	1	0	1	1	1	0	159.4	65.2	85	95.5	25.7	1	100	66	15.47	23.727	0	159.7	1	0	0		8	3.5	0.12
659	2	52.8137	4.84	13.5	181	4.5	1.1	81	25	31	44	208	153	41	47	16	0.63	89	0	1	1	0	0	1	0	1	0	0	149.3	65.6	84	96	29.5	1	128	95	15.57	23.7348	0	116.8	1	0	1		5.5	4.7	0.11
660	2	66.6849	5.62	14.3	275	4.2	1	77	22	21	15	253	182	99	51	18	0.8	91	1	0	0	0	0	0	0	0	0	0	158.2	64.5	95	102	25.8	1	113	66	15.31	23.7364	0	116.5	1	0	0		5.9	5.8	0.19
661	2	76.463	13.89	12.4	381	3.8	0.5	83	20	25	62	167	76	230	45	17	0.74	87	0	0	1	0	0	1	1	1	1	1	147.8	42.5	71	83	19.5	0	156	98	10.09	23.7412	0	118.9	1	1	0		5.1	5.9	0.03
662	2	59.6055	5.71	14.6	359	4.5	0.9	91	27	23	40	194	114	90	62	15	0.6	98	1	0	0	0	0	0	0	0	0	0	156	61.2	93	96	25.1	1	131	82	14.53	23.7418	0	105.9	1	0	1	6.6	5.5	5.8	0.36
663	2	34.6767	6.15	13.8	231	4.4	1.2	33	14	10	7	153	90	90	45	10	0.59	87	0	0	0	0	0	1	0	1	0	0	161	57.9	81	96	22.3	0	111	74	13.7499	23.7477	0	75.9922	0	0	0		5.2	4.5	0.04
664	2	72.2247	5.34	13.5	185	4.1	0.6	72	21	7	12	192	123	76	54	13	0.85	91	1	0	0	0	0	0	0	0	0	0	161.1	72	94	103	28.2	1	112	80	17.1	23.75	0	132	1	0	0		5.6	4.2	0.32
665	2	64.7863	6.47	12.6	276	4.3	1.7	78	20	19	18	218	150	126	43	17	0.57	94	1	0	0	0	0	1	0	1	0	0	148.9	56.5	90	94.5	25.4	1	107	66	13.42	23.7522	0	124	1	0	0		6	4	0.2
666	2	59.6329	4.65	14.8	355	4.4	1	123	21	23	15	181	110	83	54	19	0.59	86	0	0	0	0	0	0	0	0	0	0	153.4	51.9	76	93	22.1	0	120	83	12.33	23.7572	0	103	1	0	0		5.1	5.4	0.12
667	2	55.5425	5.66	13.5	299	3.9	0.5	76	23	25	14	218	140	79	62	11	0.59	122	1	0	0	1	1	0	0	0	0	0	150.8	57.2	88	99	25.2	1	105	77	13.59	23.7587	0	129.4	1	0	1		7.7	3.1	0.04
668	2	67.1945	7.36	14.1	249	4	0.4	38	21	22	12	196	84	248	62	15	0.75	83	0	1	1	0	0	0	1	1	1	1	151.9	55.6	80	93	24.5	0	159	92	13.21	23.759	0	99	0	0	0		6.1	4.2	0.03
669	2	59.5863	3.1	13	264	4.4	0.9	118	45	55	62	234	160	37	67	15	0.7	83	0	0	1	0	0	0	0	0	0	0	149.7	57.9	84	98	25.7	1	140	84	13.76	23.7651	0	76.1	0	0	0		5.5	4.2	0.04
670	2	48.4274	7.82	12.7	288	3.9	0.7	52	19	21	16	236		451	45	13	0.62	86	1	0	0	0	0	1	1	1	0	1	153.6	72.4	92	102.5	30.5	1	125	85	17.21	23.7707	0	100.2	1	0	1		5.3	4.4	0.03
671	2	34.4137	4.41	13	268	4.3	0.7	54	20	20	17	189	97	114	69	10	0.5	88	0	0	0	0	0	0	0	0	0	0	159.4	57	79	95	22.4	0	101	77	13.55	23.7719	0	67.6	0	0	0	8.5	5.2	4.1	0.14
672	2	57.8164	5.15	14	278	4.5	1	45	27	25	10	232	150	37	75	12	0.78	90	0	0	0	0	0	0	0	0	0	0	153.6	62.3	87	102	26.4	1	108	79	14.81	23.7721	0	107.5	1	0	0		5.8	4	0.1
673	1	61.6055	6.32	16.1	208	4.3	1.5	61	28	27	26	168	82	272	32	10	0.89	97	0	1	1	0	0	1	1	1	1	1	164.5	81	99	100	29.8	1	121	69	21.1	26.0494	1	168.2	1	0	0		7	5.4	0.1
674	2	78.6137	5.69	13	210	4.1	0.6	54	19	18	15	145	63	162	50	19	0.97	105	1	1	1	0	0	0	1	1	0	1	148.3	60.7	90	100	27.6	1	134	65	14.43	23.7727	0	122.8	1	0	0		5.5	6.5	0.05
675	2	40.0493	5.57	12.5	353	4.1	0.6	56	22	15	9	175	97	50	68	9	0.59	79	0	0	0	0	0	0	0	0	0	0	157.2	60.4	86	105	24.4	0	101	70	14.36	23.7748	0	78.8	0	0	1		5.6	4.5	0.05
676	2	62.2301	4.34	13.8	271	4.2	0.6	54	26	20	14	181	109	76	57	21	0.58	98	0	0	1	0	0	0	0	0	0	0	153.8	59.6	81.5	94.5	25.2	1	133	92	14.17	23.7752	0	113.7	1	0	0		5.2	4.1	0.02
677	1	68.2411	7.1	14.2	268	4.3	0.9	91	24	25	74	165	96	85	52	13	0.83	104	1	1	1	0	0	0	1	1	1	0	168.7	102.8	112	117	36	1	148	88	26.8	26.07	1	172.9	1	0	1		5.8	7.8	0.08
678	2	63.2493	4.06	12.8	243	4.4	0.9	75	24	17	11	121	51	85	53	15	0.67	107	1	1	1	0	0	0	0	0	0	0	154.8	71.7	91	105	29.9	1	122	66	17.05	23.7796	0	136.6	1	0	1		5.6	4.9	0.03
679	2	26.0438	6.05	15	327	4.6	0.4	82	25	42	27	232	151	80	65	12	0.81	91	1	0	0	0	0	0	0	0	0	0	168.8	79.1	93	109	27.8	1	112	71	18.81	23.78	0	132.9	1	0	0		4.9	4.1	0.3
680	2	56.1781	9.17	13.4	298	3.9	0.8	79	35	27	10	139	83	83	39	8	0.56	66	0	1	1	0	0	1	1	1	1	0	149.9	52.1	76	88	23.2	0	115	81	12.39	23.7812	0	94.1	0	0	0		5.7	5.7	1.31
681	2	34.8027	4.36	13.8	283	4.3	0.6	62	23	18	13	200	112	248	38	12	0.61	86	1	0	0	0	0	1	1	1	0	1	156.8	63.2	93	106	25.7	1	109	70	15.03	23.7816	0	78.5	0	0	1		5.2	5.1	0.06
682	2	38.6877	5.6	12.8	256	4.2	0.7	67	21	17	9	192	99	67	80	11	0.63	80	0	0	0	0	0	0	0	0	0	0	158.3	56	82	95.5	22.4	0	87	60	13.32	23.7857	0	80.9	0	0	1		5.1	5.1	0.05
683	2	54.8329	4.79	14	255	4.4	0.6	86	24	21	29	161	86	109	53	10	0.82	90	1	0	0	0	0	0	1	1	1	0	158.4	66.8	88	101	26.6	1	100	68	15.89	23.7874	0	136.3	1	0	0		5.8	3.1	0.03
684	2	35.7041	3.77	13.3	203	4.5	0.5	58	39	51	29	223	153	148	40	6	0.6	95	1	0	1	0	0	1	0	1	0	0	160.5	85.8	98	111	33.3	1	139	97	20.41	23.7879	0	148.7	1	0	1		5.5	4.7	0.9
685	2	68.4986	4.9	13.1	221	4.3	0.7	70	33	34	39	163	72	92	73	11	0.83	108	1	0	0	0	0	0	1	1	1	0	149.2	57	90	92	25.6	1	109	67	13.56	23.7895	0	110.7	1	0	0		7.3	5	0.18
686	1	34.3918	5.12	16.2	273	4.5	1.3	68	29	51	60	195	131	130	38	10	0.8	90	1	0	0	0	0	1	0	1	0	0	173.8	104.1	111	110	34.5	1	132	87	27.15	26.0807	1	164.3	1	0	1		5.2	5.4	0.2
687	2	34.5836	5.67	14.3	161	4.4	1.2	80	20	18	13	186	119	89	49	11	0.57	87	0	0	1	0	0	1	0	1	0	0	158.8	61.2	85	95	24.3	0	116	96	14.56	23.7908	0	108.6	1	0	0		4.8	5	0.18
688	2	61.8438	4.32	13.1	304	4.2	1.1	87	21	18	12	244	157	47	78	12	0.69	85	1	0	0	0	0	0	0	0	0	0	150.8	57.7	88	92	25.2	1	113	84	13.73	23.7955	0	86.9	0	0	0		5.4	4.3	0.08
689	2	26.6658	8.03	14.1	360	4.3	1.1	59	16	17	28	202	138	144	35	9	0.61	80	1	0	0	0	0	1	0	1	0	0	166.2	88.4	98	119	32	1	106	74	21.05	23.8122	0	127.3	1	0	0		4.4	5.6	0.53
690	2	54.2192	4.35	15.5	275	4.1	1	89	23	19	19	188	110	84	61	15	0.62	96	0	0	0	0	0	0	0	0	0	0	155.3	57.9	78	93	24	0	110	84	13.79	23.8169	0	138.4	1	0	0		5.5	5.2	0.12
691	2	71.5205	4.18	11.6	200	4.1	0.8	69	58	36	18	124	53	44	62	14	0.67	101	1	1	1	0	0	0	1	1	1	0	157.2	62.6	92	94	25.3	1	106	62	14.91	23.8179	0	111.8	1	0	0		6.1	3.7	0.04
692	2	75.8384	6.79	15.2	410	4.6	0.7	82	28	26	26	147	69	122	54	15	0.72	81	0	1	1	1	1	0	0	0	0	0	154.6	57.3	85	93	24	0	131	70	13.65	23.822	0	111.8	1	0	0		7.3	6.3	0.09
693	2	63.0411	4.06	13.1	234	4	0.8	60	22	20	16	122	60	57	51	12	0.76	87	1	1	1	0	0	0	1	1	1	0	154.8	70.6	97	100	29.5	1	129	81	16.82	23.8244	0	140	1	0	0		5.5	3.7	0.05
694	2	54.3808	6.23	12.9	297	4.4	0.8	71	20	22	13	240	168	194	33	19	0.72	85	1	0	0	0	0	1	1	1	0	1	153.7	60.4	88	97	25.6	1	112	76	14.39	23.8245	0	94.6	0	0	0		5.2	5.7	0.25
695	2	62.1342	4.4	14	210	4	0.8	26	23	16	11	173	112	73	46	15	0.57	93	0	1	1	0	0	1	1	1	1	0	152.3	53.3	83	94	23	0	116	74	12.7	23.8274	0	83.5	0	0	0		5.7	4.7	0.05
696	2	38.3233	4.94	12.9	241	4.2	0.6	67	15	8	9	201	120	50	71	13	0.7	88	0	0	0	0	0	0	0	0	0	0	158.2	56.4	78.5	96	22.6	0	102	77	13.44	23.8298	0	80.5	0	0	0		5.8	3.7	0.06
697	2	36.3425	6.51	13.9	344	4.5	0.8	42	37	22	42	255	159	89	78	10	0.56	91	0	0	0	0	0	0	0	0	0	0	150.1	48.8	70	95	21.7	0	122	86	11.63	23.832	0	58.5	0	0	0		5.6	4.6	0.04
698	2	62.0986	3.44	13.2	226	4.1	1.3	80	21	17	13	184	117	45	58	10	0.68	88	0	0	0	0	0	0	0	0	0	0	151.6	53.4	82	93	23.2	0	108	80	12.73	23.839	0	71.1	0	0	0		5	3.9	0.05
699	2	45.1397	5.15	13.3	216	3.8	0.5	51	17	13	10	179	106	57	62	11	0.62	85	1	0	0	0	0	0	0	0	0	0	158.8	64.3	96	104	25.5	1	100	74	15.33	23.8414	0	99.8	0	0	0		5.3	4.6	0.08
700	2	63.6795	3.71	13.5	244	4.4	0.7	87	24	30	23	160	90	126	45	12	0.77	121	1	0	0	0	0	1	1	1	1	0	154.3	61.4	88	99	25.8	1	119	78	14.64	23.8436	0	91.6	0	0	1		5.8	5.1	0.06
701	2	72.8027	4.54	14.1	354	4.3	0.7	97	37	18	37	244	179	64	52	15	0.78	89	1	1	1	0	0	0	0	0	0	0	158.3	63.6	99	103	25.4	1	140	76	15.17	23.8522	0	124.1	1	0	0		5.6	4.5	0.34
702	2	75.3726	4.69	12.1	272	3.8	0.5	72	49	57	17	150	89	72	47	19	0.81	124	0	1	1	1	1	1	0	1	0	0	154.3	58.1	85	93	24.5	0	116	79	13.86	23.8554	0	115.6	1	0	0		7.1	5	0.03
703	2	78.3342	6.96	12.3	223	4.4	0.7	52	35	19	12	172	115	74	42	13	0.72	77	0	1	1	0	0	1	0	1	0	0	142.8	47.2	78	90	23.1	0	135	63	11.26	23.8559	0	68.9	0	0	0		5.5	3.9	0.23
704	2	29.0932	4.14	13.7	191	4.4	0.7	59	24	29	15	183	119	133	37	6	0.53	82	0	0	0	0	0	1	0	1	0	0	164.2	71.3	87	111	26.4	1	95	72	17.01	23.8569	0	85.6	0	0	0		5.3	4.7	0.1
705	2	57.6247	8.12	13.2	246	4.3	0.8	69	17	23	29	166	80	109	64	15	0.65	96	0	0	0	1	1	0	1	1	1	0	158.3	57.1	86	92	22.9	0	112	71	13.6224	23.857	0	93.0808	0	0	1		7.2	3.7	0.04
706	2	56.0849	6.27	13.2	292	4.3	0.6	59	18	15	20	177	97	139	52	12	0.66	93	1	1	1	0	0	0	1	1	1	0	155.6	65.8	92	94	27	1	150	87	15.7	23.8602	0	116.6	1	0	0		6.1	4.1	0.05
707	2	43.8027	5.96	13.5	372	4.1	0.6	66	21	22	18	230	138	179	56	10	0.67	130	0	0	0	0	1	0	1	1	0	1	149.6	65	86	100	28.9	1	114	80	15.51	23.8615	0	77.8	0	0	1		6.4	5.1	0.07
708	2	43.7973	5.78	12.2	187	4.3	0.8	99	14	6	9	190	123	98	47	10	0.64	100	0	0	1	0	0	1	0	1	0	0	159.2	59.3	85	95.5	23.5	0	118	92	14.15	23.8617	0	73.8	0	0	0		5.6	3.6	0.09
709	2	59.5014	4.38	13	243	4.5	0.8	63	24	20	6	208	135	50	63	15	0.57	91	0	0	0	0	0	0	0	0	0	0	147.3	52.3	74	92	24.2	0	106	78	12.48	23.8623	0	88.8	0	0	0		5.5	4.3	0.03
710	2	66.6575	5.77	12.3	259	3.9	0.8	89	14	16	30	189	98	134	64	10	0.64	79	0	1	1	0	0	0	1	1	1	0	152.3	63.3	84	95	27.4	1	121	79	15.11	23.8705	0	116.4	1	0	0		5.8	3.5	0.99
711	2	64.0575	3.82	12.7	362	4.4	1.2	118	29	22	17	237	159	103	57	14	0.65	99	0	0	0	0	0	0	0	0	0	0	148	49.6	82.5	94	22.6	0	119	79	11.84	23.871	0	99.2	0	0	0		6	4.1	0.11
712	2	69.0301	5.73	13.7	366	4.1	0.9	93	22	10	9	205	142	44	54	15	0.47	83	1	0	0	0	0	0	0	0	0	0	151.6	64.3	103	101	28	1	126	84	15.35	23.8725	0	156.8	1	0	0		5	4.2	0.12
713	2	18.9726	4.57	13	284	4.3	1.1	67	16	28	9	131	77	89	36	12	0.51	90	0	0	0	0	0	1	0	1	0	0	162	72.3	87	107	27.5	1	110	78	17.26	23.8728	0	100.3	1	0	0		5.3	5	0.11
714	2	37.0082	5.28	13.7	206	4.3	1.2	52	19	19	13	167	106	59	49	8	0.72	89	1	0	0	0	0	1	0	1	0	0	164.8	80	97	107	29.5	1	102	73	19.1	23.875	0	104.2	1	1	0		5.5	4.6	0.05
715	2	36.1534	9.69	15.3	313	4.3	0.9	76	20	33	22	183	103	94	61	9	0.62	95	0	0	1	0	0	0	0	0	0	0	162.2	72	75	103	27.4	1	140	89	17.19	23.875	0	121.2	1	0	0		5.5	4.4	0.35
716	2	67.8548	6.54	12.1	379	4.2	0.9	67	32	21	9	186	132	44	45	9	0.63	87	0	0	0	0	0	1	0	1	0	0	151.5	53.4	85	94	23.3	0	99	59	12.75	23.8764	0	77.4	0	0	0		5.4	5.4	0.12
717	2	55.5562	7.88	14.8	332	4.6	0.7	74	31	36	13	224	104	275	65	8	0.71	88	1	0	1	0	0	0	1	1	1	1	156	68.1	95	105	28	1	112	91	16.26	23.8767	0	102.2	1	0	1		5.4	5.3	0.18
718	2	65.9315	4.33	12.8	217	4.2	1.3	76	24	19	9	160	78	52	72	13	0.49	82	0	0	0	0	0	0	1	1	1	0	150	50.8	81	96	22.6	0	125	80	12.13	23.878	0	70	0	0	0		5.4	2.9	0.04
719	1	43.0548	5.57	15.7	259	4.5	1.6	59	12	18	17	193	126	136	40	10	0.8	118	0	0	1	0	0	0	0	0	0	0	159.8	76.2	97	101	29.8	1	136	95	19.88	26.0892	1	125.8	1	0	0		5.8	5.2	0.07
720	1	32.326	5.4	16.5	249	4.8	1.7	114	103	168	148	221	118	304	42	7	0.78	96	1	0	1	0	0	0	1	1	0	1	180.2	121.6	126	118	37.4	1	172	119	31.77	26.1266	1	200.7	1	1	1		5.3	7.2	0.14
721	2	63.5836	4.69	14.1	226	4.9	1.5	102	67	60	47	200	132	136	41	15	0.72	154	1	1	1	0	1	1	1	1	1	0	157.9	69.6	94.5	94	27.9	1	124	66	16.62	23.8793	0	137.3	1	0	0		7.8	5	0.13
722	2	57.2192	3.52	16.6	238	4.3	1.1	95	21	28	56	189	106	171	49	11	0.58	95	1	1	1	0	0	1	1	1	0	1	156.9	68.5	97	105	27.8	1	122	87	16.36	23.8832	0	124	1	0	0		5.7	5.2	0.02
723	2	39.0082	6.09	13.4	229	4	0.8	57	14	10	13	168	89	40	71	8	0.63	91	1	0	0	0	0	0	0	0	0	0	158.5	61.7	95	100	24.6	0	101	66	14.74	23.8898	0	89.5	0	0	1		5.2	4.3	0.05
724	2	57.5863	3.42	13.6	268	4.5	1.2	88	26	29	24	230	164	83	49	18	0.62	79	1	0	0	0	0	1	0	1	0	0	159.6	64.5	88	101	25.3	1	124	80	15.41	23.8915	0	122.7	1	0	0		5.2	4.9	0.04
725	2	59.4301	2.95	14.6	194	4.3	0.8	55	54	65	37	187	124	108	41	11	0.62	85	1	0	1	0	0	1	0	1	0	0	151.5	63.4	90	96	27.6	1	129	93	15.15	23.8959	0	112.2	1	0	0		5.7	4.2	0.67
726	2	43.9425	5.46	14.5	217	4.5	0.5	62	25	20	41	175	93	115	59	19	0.67	94	1	0	0	0	0	0	0	0	0	0	161	79.4	98	106	30.6	1	117	72	18.98	23.9043	0	117.9	1	0	1		5.4	5.2	0.02
727	2	53.2055	5.99	11.5	253	4.1	1	69	20	12	13	217	151	161	34	15	0.7	94	0	0	0	0	0	1	1	1	0	1	150	50.2	85	90	22.3	0	102	61	12.0002	23.9047	0	56.4598	0	0	0		5.8	4.3	0.16
728	2	54.6027	5.28	14.4	310	4.5	0.6	107	22	8	14	188	100	56	77	16	0.69	95	1	0	0	0	0	0	0	0	0	0	160.5	73.5	95	104	28.5	1	114	83	17.57	23.9048	0	114.8	1	0	0		5.7	4.5	0.28
729	1	35.7288	5.57	16.7	291	4.5	1	74	49	110	39	174	111	128	37	14	0.95	72	1	0	0	0	0	1	0	1	0	0	173.8	102.9	114	116	34.1	1	117	81	26.92	26.1613	1	150.7	1	0	0		5.1	7.5	0.12
730	2	72.5726	6.2	14.6	212	4.2	0.9	51	28	21	20	170	81	123	64	19	0.66	192	1	1	1	1	1	0	1	1	1	0	156.1	62.4	93	97	25.6	1	124	64	14.92	23.9103	0	134.2	1	0	0		7.7	3.6	0.5
731	2	46.6493	7.87	13.4	297	4.3	0.8	63	20	13	12	186	107	37	72	13	0.56	75	0	0	0	0	0	0	0	0	0	0	147	49.1	77	87.5	22.7	0	101	66	11.74	23.9104	0	78.6	0	0	0		5.3	4.5	0.39
732	2	67.0822	4.72	13.2	293	4.2	0.8	99	28	26	21	202	121	43	72	9	0.59	88	0	0	0	0	0	0	1	1	1	0	154.2	56	81	98	23.6	0	100	62	13.39	23.9107	0	86.4	0	0	0		5.8	4.6	0.06
733	2	45.6301	4.18	12.9	250	4.1	1.2	54	17	10	5	164	93	45	62	14	0.52	80	0	0	0	0	0	0	0	0	0	0	149.4	45	75	90	20.2	0	91	65	10.76	23.9111	0	57.7	0	0	0		4.9	4.2	0.09
734	2	68.3068	6.37	13.1	256	4.4	0.8	81	21	17	14	163	96	94	48	15	0.57	93	1	0	0	0	0	1	1	1	1	0	153.5	58.8	92	98	25	1	95	63	14.06	23.9116	0	109.5	1	0	0		5.7	4.3	0.06
735	2	32.2849	5.48	14	249	4.5	1.1	64	23	23	12	166	67	65	86	11	0.73	90	0	0	0	0	0	0	0	0	0	0	157.8	60.3	80	101	24.2	0	120	86	14.42	23.9138	0	75.1	0	0	1		5.1	4.7	0.15
736	2	56.6548	3.45	13.8	278	4.3	0.8	63	18	14	13	219	139	40	72	15	0.52	93	1	0	0	0	0	0	0	0	0	0	154.4	64.6	95	102	27.1	1	138	77	15.45	23.9164	0	112.4	1	0	0		5.2	4.2	0.05
737	2	45.7315	8.09	13.9	309	4.4	0.8	64	17	13	17	215	148	79	51	13	0.66	119	1	0	1	0	0	0	0	0	0	0	153.8	72.5	93.5	101	30.6	1	124	92	17.34	23.9172	0	117.6	1	0	1		6.1	4.7	0.06
738	2	72.9726	6.85	13	280	4.3	1	86	24	20	19	137	80	104	36	15	0.91	92	0	1	1	0	0	1	1	1	1	0	155.8	54.7	84	96	22.5	0	127	64	13.0834	23.9185	0	110.485	1	0	0		6.3	5.1	0.61
739	2	42.4247	5.71	12.6	356	4.4	0.7	74	18	16	11	138	52	171	52	6	0.55	101	1	0	1	0	0	0	1	1	0	1	162.2	67.8	91	100	25.8	1	129	91	16.2187	23.9214	0	99.0045	0	1	1		5.3	5.1	0.5
740	2	52	5.02	14.7	313	4.5	0.7	116	22	19	26	177	110	64	54	15	0.78	84	0	0	0	0	0	0	1	1	1	0	158.8	63.2	86	97.5	25	1	128	75	15.12	23.9241	0	112.2	1	0	0		5.6	4.7	0.18
741	2	63.6384	5.93	16.5	192	4.6	0.9	80	34	44	34	246	173	88	55	11	0.62	108	1	0	0	0	0	0	0	0	0	0	156.2	58.6	89	92	24	0	127	81	14.02	23.9249	0	123.4	1	0	0		6.5	6.2	0.51
742	2	62.0986	3.8	12.8	233	4.3	1.4	66	23	16	10	209	126	33	76	18	0.77	93	0	0	0	0	0	0	0	0	0	0	156.7	58.6	86	93	23.9	0	109	87	14.02	23.9249	0	136.4	1	0	0		5.6	4.4	0.03
743	2	40.6247	4.91	12.3	236	4.3	0.8	62	16	8	8	163	92	60	59	13	0.52	88	0	0	0	0	0	0	0	0	0	0	149.5	50.7	85	92	22.5	0	102	74	12.13	23.925	0	65.1	0	0	0		5.2	4.4	0.05
744	2	48.1096	3.5	13.4	227	4.1	0.8	58	26	20	11	197	102	63	82	9	0.56	89	0	0	0	0	0	0	0	0	0	0	150.4	54.5	85	99	24.1	0	96	70	13.04	23.9266	0	90.2	0	0	0		5.2	4.6	0.04
745	1	53.7233	5.8	15.5	262	4.5	1.7	63	34	54	52	218	134	210	42	9	0.91	90	0	1	1	1	1	0	1	1	1	1	161.6	72.7	94	99	27.8	1	118	79	19.02	26.1623	1	162.8	1	0	1		5.2	5	0.08
746	1	52.5288	7.29	16.7	355	4.4	0.5	102	36	57	225	206	104	185	65	6	0.88	89	0	0	0	0	0	0	1	1	0	1	159	58.3	86.5	89	23.1	0	98	72	15.27	26.1921	1	109.9	1	1	1		6	5.4	0.12
747	2	37.0904	6.94	12.5	427	4.1	0.5	46	23	16	12	179	92	139	59	14	0.65	87	0	0	0	0	0	0	0	0	0	0	149.6	57.3	87	105	25.6	1	97	72	13.71	23.9267	0	64	0	0	1		5.7	4.8	0.21
748	2	60.9589	6.19	13.5	320	4.3	0.9	67	24	15	13	241	170	92	53	10	0.75	83	0	0	0	0	0	0	0	0	0	0	151	61.3	86	96	26.9	1	122	81	14.67	23.9315	0	114.7	1	0	0		6	4.5	0.06
749	2	43.2082	5.09	12.6	287	3.9	0.9	113	28	29	26	209	119	43	81	16	0.54	103	0	0	0	0	0	0	0	0	0	0	159.8	67.9	85	101	26.5	1	90	67	16.25	23.9323	0	96.7	0	0	0		6.1	4.6	0.16
750	2	68.7671	4.52	13	272	4.3	0.9	85	35	26	24	198	134	97	45	14	0.67	84	1	1	1	0	0	1	1	1	1	0	152.1	72.2	92	105	31.2	1	157	79	17.28	23.9335	0	154.6	1	0	0		5.8	4.5	0.03
751	2	55.3973	5.45	12.3	266	4.4	0.9	80	20	24	15	193	125	126	43	10	0.67	117	0	1	1	1	1	1	0	1	0	0	141.2	44.7	77	80.5	22.5	0	130	81	10.7	23.9374	0	64.3	0	0	0		6.8	3.9	0.15
752	2	57.7918	8.03	14.1	301	4.5	0.9	77	39	44	19	211	136	104	54	19	0.63	82	1	1	1	0	0	0	0	0	0	0	154.6	65.5	91.5	99	27.4	1	130	85	15.68	23.9389	0	130	1	0	0		5.7	4.8	0.02
753	2	45.2301	6.49	12.4	296	4.3			48	55	28	184	119	102	45		0.71	115	1	0	1	0	0	1	0	1	0	0	161	70.8	89	101	27.3	1	150	112	16.95	23.9407	0	163.7	1	0	0		5.8		0.61
754	2	62.7699	4.3	13.3	275	4.2	1.1	67	30	23	25	225	158	64	54	8	0.64	102	0	1	1	0	0	0	0	0	0	0	149.3	54.3	84	90	24.4	0	133	90	13	23.9411	0	107.7	1	0	0		5.5	4.7	0.07
755	2	48.2795	6.74	14.4	214	4.4	1.1	68	17	11	9	163	87	107	55	13	0.68	95	0	0	0	0	0	0	0	0	0	0	152.8	62.4	85	98	26.7	1	119	85	14.94	23.9423	0	81.3	0	1	1		5.7	4.8	0.06
756	2	58.1699	5.62	14.1	268	4.3	1.2	74	18	14	19	197	132	101	45	12	0.82	98	1	0	0	0	0	1	0	1	0	0	158.9	81.9	107.5	108	32.4	1	108	70	19.61	23.9438	0	162.2	1	0	0		5.7	5.2	0.17
757	2	47.2493	6.01	14.3	248	4.7	0.7	67	22	18	10	148	85	50	53	11	0.62	85	0	0	1	0	0	0	0	0	0	0	156.9	61.3	87	100	24.9	0	166	102	14.68	23.9478	0	87.4	0	0	0		5.4	4.5	0.04
758	2	42.5644	6.24	14	308	4.2	1	50	17	14	9	234	147	56	76	9	0.62	96	0	0	1	0	0	0	0	0	0	0	158.4	67.6	78	98	26.9	1	131	99	16.19	23.9497	0	98.8	0	0	0		5.6	4.6	0.35
759	2	64.0767	8	14	347	4.4	0.6	75	19	18	11	155	75	105	59	14	0.73	136	1	1	1	1	1	0	1	1	1	0	163.6	60.5	94	90.5	22.5	0	161	108	14.49	23.9504	0	161.5	1	0	0		6.8	5.3	0.02
760	2	59.6466	6.85	15.7	281	4.4	0.9	57	24	27	32	213	107	155	75	16	0.96	106	1	1	1	0	0	0	1	1	1	1	159.5	61	90	96	24	0	134	88	14.61	23.9508	0	153.3	1	0	0		6.5	4.8	0.04
761	2	53.0082	6.14	14	353	4.2	1	68	38	44	18	228	149	40	71	12	0.67	77	0	0	0	0	0	0	0	0	0	0	152	54.4	85	89	23.5	0	114	81	13.03	23.9522	0	99.6	0	0	1		5.3	5.3	0.18
762	2	73.2493	5.05	13.6	226	4.2	1.3	54	33	32	30	220	157	79	47	14	0.62	87	1	1	1	0	0	1	1	1	1	0	160.4	70.8	97	110	27.5	1	144	82	16.96	23.9548	0	170.9	1	0	0		5.8	4.2	0.06
763	2	70.7808	5.68	14.2	320	4.1	0.7	93	50	57	25	190	110	94	61	16	0.66	92	1	1	1	0	0	0	0	0	0	0	157.8	74.8	92	106	30	1	140	78	17.92	23.9572	0	145.3	1	0	1		5.9	6.7	0.17
764	2	77.0685	4.67	16	230	4.5	0.9	91	21	16	24	293	217	103	55	11	0.77	109	1	1	1	0	0	0	0	0	0	0	152.5	58.1	88	93.5	24.8	0	134	84	13.92	23.9587	0	136.5	1	0	0		5.9	2.7	0.06
765	2	52.3973	5.06	12.4	233	4	0.6	55	26	18	12	213	140	64	60	20	0.67	90	0	0	0	0	0	0	0	0	0	0	143.8	49	68	90	23.6	0	93	61	11.74	23.9592	0	92.2	0	0	0		5.6	4.6	0.04
766	2	52.0466	4.47	12.8	298	4.1	1	86	39	61	28	240	167	87	56	12	0.52	87	1	1	1	0	0	0	0	0	0	0	156.8	67.8	92	99.5	28.1	1	132	77	16.25	23.9676	0	144.1	1	0	0		5.8	3.2	0.69
767	2	61.2795	6.63	14.1	254	4.5	1.1	103	28	32	15	180	110	79	54	12	0.7	85	0	0	0	0	0	0	1	1	1	0	154.1	55.4	78	97	23.3	0	99	67	13.28	23.9711	0	83.7	0	0	0		5.8	5.8	0.03
768	2	81.1808	4.91	13.2	236	4.4	0.9	50	38	44	37	189	92	116	74	13	0.71	116	0	1	1	0	0	0	1	1	1	0	152.6	55.9	84	91	24	0	125	74	13.4	23.9714	0	122.8	1	0	0		5.9	5	0.06
769	2	75.1178	6.28	12.8	286	4.1	0.8	83	19	15	12	204	134	66	57	15	0.51	87	0	1	1	0	0	0	0	0	0	0	143.9	45.8	82	85	22.1	0	109	72	10.98	23.9738	0	73	0	0	0		5.4	5	0.23
770	2	57.4247	8.43	13	272	4.1	0.8	70	18	14	11	174	103	51	61	11	0.72	96	0	0	0	0	0	0	0	0	0	0	155.8	54.1	75	91	22.2	0	123	86	12.97	23.9741	0	102.3	1	0	0		5.4	5.8	0.46
771	2	66.8027	8.25	13.4	322	4.6	1.3	63	26	18	15	258	179	72	65	18	0.7	91	0	0	1	0	0	0	0	0	0	0	150.7	46.8	77	85	20.6	0	138	95	11.22	23.9744	0	83.7	0	0	0		5.7	4.9	0.02
772	1	86.1973	6.98	13.5	327	4.1	0.5	110	25	6	74	173	111	156	31	46	1.67	127	0	1	1	1	1	1	1	1	0	1	160.2	63.4	92	94	24.8	0	126	59	16.6063	26.1929	1	130.427	1	0	0		7.3	9.5	0.18
773	2	49.1479	4.26	13.4	253	4.2	0.9	75	21	21	7	195	121	143	45	13	0.64	89	0	0	1	0	0	1	0	1	0	0	154.4	64.9	76	99	27.4	1	128	95	15.56	23.9753	0	132.3	1	0	0		5.3	2.3	0.12
774	1	29.1836	5.7	15.2	304	4.2	0.7	71	49	58	26	167	89	101	58	8	0.74	95	0	0	0	0	0	0	0	0	0	0	165.9	74.9	83	101	27.2	1	135	89	19.62	26.1949	1	128.6	1	0	1		5.5	6.7	0.17
775	2	37.8877	4.53	13.2	274	4.5	2.7	36	18	9	5	171	95	54	65	10	0.65	78	0	0	0	0	0	0	0	0	0	0	150.7	49.8	73.5	95.5	21.9	0	107	71	11.94	23.9759	0	71.8	0	0	0		5	4.5	0.04
776	2	62.474	6.85	14.2	272	4.4	1	50	19	12	11	233	161	95	53	11	0.81	79	0	1	1	0	0	0	0	0	0	0	161.9	59.6	85.5	94.5	22.7	0	103	80	14.29	23.9765	0	59.8	0	0	0		5.7	4.3	0.04
777	2	52.1397	3.87	14	259	4.5	0.6	57	22	23	11	224	163	68	47	14	0.52	102	1	0	0	0	0	1	1	1	1	0	155.2	63.1	88	94	26.2	1	104	74	15.13	23.9778	0	118.2	1	0	0		5.5	4.5	0.06
778	2	54.011	5.27	14	401	4.2	0.9	74	18	17	26	179	120	78	43	10	0.61	102	1	0	0	0	0	1	0	1	0	0	154.3	70.1	88	100	29.4	1	105	70	16.81	23.98	0	109.2	1	0	0		5.9	4.2	0.21
779	1	53.4712	6.86	14.8	248	4	0.8	66	27	30	56	173	85	169	54	12	0.83	154	1	1	1	0	1	0	1	1	0	1	170.6	98	109	111	33.5	1	132	98	25.68	26.2041	1	172.7	1	0	1		6.4	6.4	0.26
780	2	59.2466	5.18	14.3	198	4.4	0.7	72	23	16	13	225	134	91	73	11	0.57	99	0	0	0	0	0	0	0	0	0	0	147.1	42.7	67	89	19.7	0	117	87	10.24	23.9813	0	48.7	0	0	0		5.7	4	0.02
781	1	62.1342	5.79	15.9	223	4.5	1.4	69	54	96	36	205	133	74	57	12	1.07	85	0	0	0	0	0	0	0	0	0	0	163.6	77	98	96.5	28.6	1	109	87	20.18	26.2078	1	165.7	1	0	1		5.7	7.7	0.09
782	2	50.2932	5.42	13.9	264	4.1	1.1	97	15	13	20	235	158	148	47	8	0.59	91	0	0	0	0	0	1	0	1	0	0	153.2	64.3	81	101	27.4	1	107	81	15.42	23.9813	0	97.5	0	0	1		5.5	4.5	1.68
783	2	50.263	4.99	10.5	316	4	0.4	72	18	12	5	210	127	180	47	13	0.69	90	1	0	0	0	0	1	1	1	0	1	156.3	72.5	91	102	29.8	1	115	72	17.39	23.9862	0	126.1	1	0	0		5.8	4.4	0.12
784	2	50.4192	6.27	14.4	145	4.8	0.9	72	15	17	16	195	116	95	60	13	0.71	109	0	0	1	0	0	0	0	0	0	0	151	45.9	76	89	20.1	0	136	102	11.01	23.9869	0	79.6	0	0	0		5.7	6	0.03
785	2	67	4.74	12.1	259	4.4	0.6	75	17	14	14	162	83	163	46	15	0.45	90	0	0	0	0	0	1	1	1	1	1	158.6	66.6	87.5	98	26.5	1	127	80	15.98	23.994	0	135.9	1	0	0		5.7	3.8	0.02
786	1	56.0027	8.86	16.4	300	4.6	1.3	83	34	40	36	178	114	154	33	12	1.09	148	0	1	1	1	1	1	1	1	0	1	165.6	74.8	97	100	27.3	1	156	107	19.61	26.2166	1	151.7	1	0	1		7.2	9	0.29
787	1	81.8932	6.94	11	235	3.8	0.5	63	28	21	29	143	91	55	41	41	1.15	99	0	1	1	0	0	0	0	0	0	0	167.4	72.8	95.5	99	26.1	1	132	73	19.09	26.2225	1	181.6	1	0	0		6	10.9	0.61
788	2	63.0274	6.38	13.9	272	4.4	0.8	76	24	21	24	213	141	61	60	12	0.62	79	0	0	0	0	0	0	0	0	0	0	149.5	50.8	82	88	22.6	0	105	64	12.19	23.9961	0	88.2	0	0	0		5.2	5.3	0.06
789	2	56.8767	3.96	14	162	4.3	0.7	72	21	17	15	229	136	52	83	9	0.58	93	1	0	0	0	0	0	0	0	0	0	162.3	67.3	90	103	25.5	1	116	75	16.15	23.997	0	109.4	1	0	0		5.3	3.6	0.06
790	2	45.1151	8.47	12.9	437	4.2	0.6	84	17	21	19	210	137	171	39	11	0.67	103	1	0	1	0	0	1	1	1	0	1	157	82.8	91.5	107.5	33.6	1	143	96	19.87	23.9976	0	135.1	1	0	1		6	4.3	0.26
791	2	46.5041	6.17	13.9	298	4.2	1	41	23	17	15	249	162	104	66	9	0.66	90	0	0	0	0	0	0	0	0	0	0	164.1	62.7	83	99	23.3	0	123	86	15.05	24.0032	0	93.8	0	0	0		5.4	5.5	0.6
792	2	52.526	7.9	12.7	278	4.3	0.8	76	17	17	10	172	89	165	50	10	0.5	91	0	0	0	0	0	0	1	1	0	1	154.9	53.4	83.5	92	22.2	0	116	77	12.82	24.0075	0	80.3	0	0	0		5.3	2.3	0.11
793	2	68.0795	6.78	15.1	225	4.3	1.2	95	33	35	22	203	114	262	37	13	0.93	112	1	1	1	0	0	1	1	1	0	1	147.7	62.5	90	93	28.6	1	142	77	15.01	24.016	0	117.5	1	0	0		5.6	4.4	0.2
794	2	75.9808	5.35	10.3	115	3.9	0.8	76	37	32	14	131	65	82	50	13	0.76	107	0	0	0	1	1	0	0	0	0	0	152.1	61.5	86	95	26.6	1	100	61	14.77	24.0163	0	100	1	0	0		6.8	5.6	0.08
795	2	52.1616	3.3	13.2	251	4.4	1	107	22	15	12	206	150	71	42	14	0.73	88	1	0	0	0	0	1	0	1	0	0	159.4	70.2	88	101	27.8	1	117	83	16.86	24.0171	0	119.9	1	0	0		5.5	3.5	0.13
796	2	45.2055	5.2	13.4	293	4.2	1.2	56	26	26	29	217	133	105	63	16	0.72	96	1	0	1	0	0	0	0	0	0	0	157.5	67.4	88	92	27	1	124	92	16.19	24.0208	0	81.4018	0	0	0		5.6	3.3	0.09
797	1	41.6603	5.49	16.4	242	4.4	1	103	32	50	51	171	117	111	32	10	0.78	78	1	0	1	0	0	1	0	1	0	0	177.3	103.1	107	109	32.9	1	134	97	27.04	26.227	1	203.9	1	1	0		5.6	7	0.29
798	2	53.7507	6.87	13.2	295	4.2	0.8	62	13	15	12	230	135	55	84	17	0.64	99	0	0	0	0	0	0	0	0	0	0	148.7	51.7	82	93	23.4	0	123	75	12.42	24.0232	0	95.9	0	0	0		5.4	4.6	0.3
799	2	60.0849	3.77	13	185	4.3	0.7	90	42	57	149	199	120	95	60	15	0.56	103	1	1	1	0	0	0	0	0	0	0	154.6	67.6	89	100	28.3	1	106	74	16.24	24.0237	0	97.1	0	0	1		5.7	3.8	0.1
800	2	60.1644	5.39	14	277	4.1	0.7	84	24	13	13	238	133	35	98	15	0.74	78	0	1	1	0	0	0	0	0	0	0	148.5	51.9	82	95	23.5	0	115	70	12.47	24.027	0	65.5	0	0	1	6.7	5.5	5.4	0.08
801	2	69.874	5.45	12.8	231	4.3	0.8	66	28	18	12	192	113	150	49	14	0.69	98	0	0	0	0	0	1	1	1	1	1	158.1	62.8	84	101	25.1	1	124	72	15.09	24.0287	0	130.8	1	0	0		5.4	4.5	0.1
802	2	50.3342	4.22	12.6	270	4.1	0.6	75	22	15	12	196	126	53	59	8	0.79	93	1	1	1	0	0	0	0	0	0	0	160.5	75.4	97.5	100.5	29.1	1	137	97	18.12	24.0318	0	127.7	1	0	0		5.5	4.1	1.42
803	2	58.5205	4.04	12.5	303	4.3	0.6	44	21	11	9	254	171	48	73	13	0.7	86	0	0	0	0	0	0	0	0	0	0	143.7	48.6	72	85	23.4	0	105	70	11.68	24.0329	0	58.1	0	0	0	7.6	5.5	4.4	0.03
804	2	61.0877	4.54	12.2	319	4.2	1.6	60	24	17	13	176	118	68	44	10	0.76	86	0	0	0	0	0	1	0	1	0	0	149	56	78	94	25.2	1	94	65	13.46	24.0357	0	95.6	0	0	0		5.6	4.9	0.08
805	2	68.8521	8.15	11.8	365	4	1	78	35	22	23	231	147	214	41	16	0.9	85	0	0	0	1	1	1	1	1	1	1	157.6	48.8	84	85	19.6	0	102	69	11.73	24.0369	0	103.4	1	0	0		6.4	7.6	0.19
806	2	58.8301	5.02	12.2	289	4.1	1	91	21	15	23	207	134	163	40	8	0.47	110	0	0	0	0	0	1	1	1	0	1	149.1	47.8	81	89	21.5	0	123	80	11.49	24.0377	0	93.8	0	0	0		6.6	3.4	0.24
807	2	64.9781	3.18	13.3	242	4.3	0.9	59	28	19	11	178	107	34	64	12	0.6	96	0	1	1	0	0	0	1	1	1	0	152.1	54.2	75	95	23.4	0	116	76	13.03	24.0406	0	72.3	0	0	0		6.1	4.9	0.03
808	2	55.4493	5.24	13.7	285	4.6	1.1	96	25	25	33	229	163	70	52	14	0.69	99	1	0	0	0	0	0	0	0	0	0	155.9	63.6	98	101	26.2	1	90	62	15.29	24.0409	0	108	1	0	0		5.5	4.5	0.1
809	2	46.6356	6.8	14.3	264	4.4	1	61	22	15	11	190	125	106	44	11	0.62	82	0	0	0	0	0	1	0	1	0	0	148.8	48.5	78	87	21.8	0	105	63	11.66	24.0412	0	81.2	0	0	0		5.3	4.8	0.05
810	2	47.3096	6.71	12.7	296	4.3	0.7	43	20	14	25	203	94	347	40	12	0.62	98	1	0	0	0	0	1	1	1	0	1	157.6	68	93	103	27.4	1	122	85	16.35	24.0441	0	108.7	1	0	1		5.8	6.3	0.18
811	2	70.011	8.2	14	253	4.4	0.9	56	39	45	26	216	115	135	74	12	0.59	88	0	1	1	0	0	0	1	1	1	0	154.2	55.6	81	95	23.4	0	114	73	13.37	24.0468	0	114.6	1	0	0		6.2	6.4	0.13
812	2	37.6932	4.43	14.6	254	4.3	1.4	82	19	15	14	250	169	163	48	10	0.7	89	1	0	0	0	0	1	1	1	0	1	156.6	63	89	104	25.7	1	111	69	15.15	24.0476	0	111.7	1	0	0		5.4	5.5	0.15
813	2	54.5589	2.65	13.1	199	4.4	1.1	75	24	14	19	181	94	28	81	11	0.56	88	1	0	0	0	0	0	0	0	0	0	153.4	66.7	90	97	28.5	1	138	81	16.04	24.048	0	134.1	1	0	0		5.4	4.1	0.06
814	2	63.6301	4.66	13.5	297	4.5	0.9	116	47	58	35	184	111	64	60	16	0.77	93	0	0	0	0	0	0	0	0	0	0	150.8	60.5	86	102	26.6	1	127	87	14.55	24.0496	0	104.9	1	0	1		5.8	3.4	0.1
815	2	28.8082	3.97	13.8	241	4.2	1	51	23	14	16	184	110	59	62	7	0.53	87	0	0	0	0	0	0	0	0	0	0	152.6	49.6	75	92	21.3	0	100	78	11.93	24.0524	0	76.9	0	0	0		5.3	4.9	0.2
816	1	62.4329	10	14.1	304	4.5	0.7	60	33	40	49	188	114	189	36	15	0.96	180	0	1	1	1	1	1	1	1	1	1	164.8	67.7	95	97	24.9	0	132	81	17.76	26.2334	1	148.1	1	1	1	10.7	7.8	5.2	0.62
817	2	66.9233	4.72	14.1	267	4.3	0.8	85	22	18	21	182	106	76	61	21	0.76	96	1	1	1	0	0	0	0	0	0	0	155.5	60.1	88	93	24.7	0	120	78	14.46	24.0599	0	141	1	0	0		5.8	5.2	0.07
818	2	42.4658	5.57	13.4	310	4.4	0.9	69	22	18	14	233	147	78	70	8	0.63	94	0	0	0	0	0	0	0	0	0	0	159.1	55.4	71	96	21.9	0	109	81	13.33	24.0614	0	100.9	1	0	0		5.5	4.1	0.1
819	2	55.9699	5.19	13.9	241	4	0.6	48	20	17	12	255	168	92	69	13	0.65	101	0	0	0	0	0	0	0	0	0	0	158.2	60.3	82	94	24.2	0	104	69	14.51	24.063	0	79.1	0	0	0		5.7	4.5	0.05
820	2	19.8274	5.41	12.5	348	4.5	0.5	46	23	11	8	214	136	98	58	9	0.54	91	0	0	0	0	0	0	0	0	0	0	157.7	52.9	74	91	21.3	0	101	74	12.73	24.0643	0	75.1	0	0	0		5.9	4.1	0.03
821	2	83.3507	4.54	11.2	234	4.3	0.8	111	28	25	16	187	126	67	48	17	0.86	100	1	1	1	0	0	1	1	1	1	0	150.9	66.4	103	96	29.2	1	154	83	15.98	24.0663	0	132.7	1	0	0		6.2	4.4	0.03
822	2	63.0904	6.73	14.2	272	4.9	1.5	96	33	39	27	207	132	108	53	19	0.86	117	0	1	1	0	0	0	1	1	1	0	150	52.6	85	94	23.4	0	124	74	12.66	24.0684	0	108.3	1	0	0		6.3	5.2	0.06
823	2	40.4137	6.92	10.9	381	4.4	0.9	53	19	22	14	178	106	102	52	10	0.77	94	1	0	0	0	0	0	0	0	0	0	162	67.8	89	105	25.8	1	115	76	16.32	24.0708	0	102.3	1	0	1		5.5	4.4	0.1
824	2	52	4.06	13.9	221	4.4	0.8	56	30	31	21	113	54	53	48	12	0.69	78	0	1	1	0	0	1	0	1	0	0	153.9	58.9	84	98	24.9	0	114	85	14.18	24.0747	0	88.1	0	0	0		6.1	4.5	0.13
825	2	74.2329	5.48	13.3	208	4.2	0.9	65	24	19	9	202	132	84	53	16	0.8	96	1	0	0	0	0	0	0	0	0	0	159	70.4	91	99	27.8	1	124	75	16.95	24.0767	0	142.6	1	0	0		5.8	4.6	0.06
826	2	64.2027	5.59	13.6	279	4.6	1	61	32	39	12	223	161	65	49	14	0.71	87	0	0	0	0	0	1	0	1	0	0	149.4	51.5	80	91	23.1	0	114	76	12.4	24.0777	0	83	0	0	0		5.4	3.8	0.06
827	2	75.9205	4.89	14.4	398	4.1	0.7	77	29	39	146	253	163	183	53	21	0.7	103	1	0	0	0	0	0	1	1	0	1	155.1	66.7	95	96	27.7	1	123	86	16.06	24.078	0	108.1	1	0	1		5.8	4.3	0.57
828	2	59.2137	4.67	13.3	236	4	1.1	42	22	25	19	187	101	199	46	17	0.62	86	0	1	1	0	0	1	1	1	1	1	152.5	54.6	83	93	23.5	0	102	68	13.15	24.0842	0	88.1	0	0	0		6	3.6	0.15
829	2	63.4247	5.07	14.7	182	4	0.7	109	120	78	34	169	98	80	55	10	0.63	79	0	0	0	0	0	0	0	0	0	0	155.2	61.7	85	97	25.6	1	114	78	14.86	24.0843	0	117.1	1	0	0		5.5	5.5	0.97
830	2	41.6	4.09	6.4	327	4.4	0.8	68	12	10	5	171	103	78	52	7	0.47	85	0	0	0	0	0	0	0	0	0	0	159.8	60.2	85	93	23.6	0	118	77	14.5	24.0864	0	86	0	0	0		5	2.5	0.04
831	1	60.137	8.41	14.5	258	3.8	0.7	70	27	31	11	137	66	139	43	15	1.01	190	1	0	0	1	1	0	0	0	0	0	166.3	89.8	114	102.5	32.6	1	128	88	23.56	26.2361	1	167.4	1	1	1		8	7.4	0.12
832	2	44.7918	5.76	10	314	3.9	0.7	76	14	11	7	198	139	75	44	9	0.59	81	0	0	0	0	0	1	0	1	0	0	153.4	59.7	78.5	94	25.5	1	116	76	14.38	24.0871	0	116.6	1	0	0		5.8	5	0.25
833	2	51.8685	5.2	12.9	286	4.4	0.8	76	20	14	12	193	118	91	57	20	0.65	92	0	0	0	0	0	0	0	0	0	0	159.3	58.7	87	94	23.2	0	117	81	14.14	24.0886	0	112.1	1	0	0		5.6	4.9	0.04
834	2	29.4822	5.44	12.7	304	4.8	1.6	61	22	17	42	173	87	80	70	8	0.65	60	1	1	1	0	0	0	0	0	0	0	159.8	64.5	92	102	25.3	1	114	80	15.54	24.093	0	63.9	0	1	1		4.8	5.2	0.05
835	2	65.9452	5.63	13.5	195	3.9	0.9	67	23	22	20	217	136	154	50	10	0.58	89	1	0	0	0	0	0	1	1	0	1	149.2	59.6	88	95	26.8	1	130	82	14.36	24.094	0	72.7	0	0	0		6	3.7	0.15
836	2	62.1753	6.07	14	223	4.2	1.5	98	22	13	15	206	142	102	44	17	0.71	108	1	0	0	0	0	1	0	1	0	0	157.6	62.5	94	97	25	1	111	73	15.06	24.096	0	68	0	0	0		5.5	4.2	0.13
837	2	25.8603	8.13	14.4	335	4.6	0.7	40	15	10	12	257	154	66	90	12	0.8	78	0	0	0	0	0	0	0	0	0	0	150.5	49.4	73	90	21.7	0	107	72	11.91	24.1093	0	59.1	0	0	1		5	4.9	0.02
838	2	56.611	3.93	14.2	253	4.4	1.2	66	44	58	20	156	74	60	70	12	0.63	77	0	0	0	0	0	0	1	1	1	0	153.5	55.6	80	91	23.4	0	106	74	13.41	24.1187	0	78.5	0	0	0		4.7	3.7	0.02
839	2	54.7479	5.77	13.6	272	4.1	0.8	123	74	75	28	133	78	53	44	20	0.47	91	0	1	1	0	0	1	0	1	0	0	149.3	49	77	84	22.1	0	148	73	11.82	24.1224	0	86.8	0	0	0		6.1	5	0.05
840	2	55.0493	6.86	13.1	249	4.5	2.5	82	39	40	93	245	141	270	50	15	0.84	107	1	0	0	0	0	0	1	1	1	1	152.8	74.3	95	108	31.8	1	117	78	17.93	24.1319	0	110.3	1	0	0	12.3	5.7	9.8	0.64
841	2	71.1397	9.55	12.1	534	4.3	0.9	90	50	21	13	166	109	85	40	12	0.75	102	0	0	1	0	0	1	0	1	0	0	148.7	45.7	79	86	20.7	0	153	93	11.03	24.1357	0	90.3	0	0	0		5.7	2.8	0.43
842	1	30.611	6.33	16.3	311	4.4	0.6	65	19	20	21	201	124	181	41	14	0.79	85	1	0	1	0	0	0	1	1	1	1	181.3	99.1	104	112	30.2	1	145	78	26	26.2361	1	202.4	1	0	1		5	6.4	0.09
843	2	54.3096	6.55	14.9	247	4.5	0.5	83	29	17	9	202	130	47	63	20	0.63	95	0	0	0	0	0	0	0	0	0	0	157.5	53.1	87	92	21.4	0	120	83	12.82	24.1431	0	70.4	0	0	1		5.4	4.1	0.07
844	2	58.1808	4.67	12.9	274	4.2	1.1	102	32	40	84	261	168	104	72	10	0.48	91	0	0	0	0	0	0	0	0	0	0	151.2	54	75	91	24	0	102	64	13.04	24.1481	0	67.9	0	0	0		5.7	3.8	0.02
845	2	81.7945	5.42	14.5	132	4	0.8	74	37	37	8	114	54	58	48	14	0.69	60	0	0	0	0	0	1	1	1	1	0	143.6	49.9	86	92	24.2	0	106	59	12.05	24.1483	0	101.4	1	0	0		5.2	6	0.06
846	2	56.7123	3.81	11.2	210	4.3	0.4	47	28	25	24	170	86	126	59	16	0.69	99	0	1	1	0	0	0	1	1	1	0	154	48.9	78	89	20.6	0	112	77	11.81	24.1513	0	108.3	1	0	0		5.6	3.3	0.05
847	2	55.6603	6.96	15.5	276	4.4	2.4	135	37	48	15	175	93	118	58	10	0.69	86	0	1	1	0	0	0	1	1	1	0	155.4	61.4	83	98	25.4	1	118	86	14.83	24.1531	0	76.9	0	0	0		5.1	5.3	0.08
848	2	37.9014	5.42	14.3	331	4.4	1.6	68	14	14	13	234	166	55	57	10	0.62	75	1	0	0	0	0	0	0	0	0	0	162.8	70.3	92	103	26.5	1	110	67	16.98	24.1536	0	99.2	0	0	1		5	5.3	0.1
849	2	38.3918	8.17	12.1	409	4.4	0.6	65	16	21	21	177	109	176	33	11	0.49	87	1	0	0	0	0	1	1	1	0	1	159	67.6	95	95	26.7	1	127	86	16.33	24.1568	0	115.8	1	1	0		5.6	4.6	0.68
850	2	57.9781	5.41	12.5	286	4.3	1.1	78	28	23	26	237	158	48	69	16	0.62	104	1	1	1	0	0	0	0	0	0	0	157.8	71.9	89	100	28.8	1	118	83	17.37	24.1586	0	112.2	1	0	0		6	4	0.1
851	2	55.0466	8.43	14.4	294	4.5	1.7	62	18	15	15	212	135	97	58	18	0.87	84	1	0	0	0	0	0	0	0	0	0	156.9	71.9	96	107	29.2	1	106	72	17.37	24.1586	0	135.5	1	0	0		6	5.8	0.26
852	2	53.5726	4.84	14.2	266	4.4	0.6	110	28	22	16	236	150	177	51	10	0.71	96	0	0	0	0	0	0	1	1	0	1	159.6	56.5	82	90	22.2	0	110	77	13.65	24.1593	0	98	0	0	0		5.4	4	0.08
853	2	60.7233	5.57	12.7	228	4.3	0.8	76	22	24	42	217	157	61	48	23	0.93	94	1	1	1	0	0	1	0	1	0	0	159.7	67.5	93	100	26.5	1	114	72	16.31	24.163	0	95.7	0	0	0		5.6	8.4	0.29
854	2	49.6575	4.11	12.2	318	4.2	0.5	63	15	9	9	197	112	75	70	11	0.62	99	1	0	0	0	0	0	0	0	0	0	154.4	58.6	91	93	24.7	0	116	70	14.16	24.1638	0	79.8	0	0	0		5.8	5.3	0.04
855	2	54.2247	5.92	13.3	349	4.4	0.7	73	17	14	14	185	117	70	54	10	0.56	89	0	0	0	0	0	0	0	0	0	0	146.7	52.1	86	92.5	24.1	0	124	87	12.59	24.1651	0	80.1	0	0	0		5.3	3.6	0.03
856	2	48.8438	4.4	12.5	302	4.2	0.8	62	20	12	12	206	124	82	66	15	0.54	78	0	0	0	0	0	0	0	0	0	0	149.9	54.5	78	95	24.3	0	103	72	13.17	24.1651	0	80.3	0	0	0	5.4	5.2	3.9	0.02
857	2	70.2932	4.56	15.5	243	4.2	0.9	96	28	17	19	192	108	56	73	15	0.63	88	0	1	1	0	0	0	1	1	1	0	150.8	45.6	76	87	20.1	0	124	70	11.02	24.1667	0	57.4	0	0	0	6.5	5.5	3.9	0.02
858	2	35.9479	5.94	12.5	369	4.8	1	48	22	13	10	195	111	27	79	9	0.58	75	0	0	0	0	0	0	0	0	0	0	153.4	56.4	83	96	24	0	93	74	13.63	24.1667	0	65.5	0	0	1		5.6	4.5	0.07
859	2	61.9918	7.91	14.8	248	4.4	0.6	106	22	16	19	251	168	197	44	12	0.95	119	1	0	0	0	0	1	1	1	0	1	159.7	66	93	103	25.9	1	119	84	15.95	24.1667	0	122.6	1	0	0		6.5	5.8	0.12
860	2	56.5342	5.24	14.1	264	4.6	0.8	84	35	41	44	206	135	56	60	15	0.81	123	0	0	0	0	0	0	0	0	0	0	148.7	58.5	86	94	26.5	1	115	84	14.14	24.1709	0	108.6	1	0	0		5.8	4.1	0.35
861	2	53.4137	5.2	12.6	248	4.1	1.9	64	60	66	30	148	85	46	54	12	0.41	81	0	0	0	0	0	0	0	0	0	0	153.8	53.9	77	98	22.8	0	119	73	13.03	24.1744	0	96.9	0	0	0		5.2	4.6	0.11
862	2	55.5616	4.37	12.9	208	4.5	0.8	123	165	431	66	134	71	82	47	14	0.66	95	0	1	1	0	0	1	1	1	1	0	151.7	58.2	81	94	25.2	1	109	77	14.07	24.1753	0	94.6	0	0	0		6	4.1	0.05
863	1	81.7562	6.68	16.1	220	4.3	1.1	57	27	20	42	216	158	68	44	17	0.88	103	0	1	1	0	0	0	0	0	0	0	160.4	71.6	95.5	95	28	1	137	85	18.79	26.243	1	143.8	1	0	1		6.6	6.3	0.32
864	2	45.0575	5.72	13.3	258	4.8	0.8	68	23	28	23	253	178	117	52	15	0.77	98	1	0	0	0	0	0	0	0	0	0	156.4	58.9	88	100	24.1	0	97	65	14.24	24.1766	0	107.5	1	0	0		5.7	5.8	0.18
865	2	57.1397	3.28	13.8	213	4.3	0.7	71	19	12	7	194	126	84	51	14	0.62	95	1	0	0	0	0	0	0	0	0	0	154.1	61.5	95	96	25.9	1	111	73	14.87	24.1789	0	120.2	1	0	0		5.4	5	0.05
866	2	49.8685	4.97	14.9	334	4.7	0.8	56	39	51	37	272	185	155	56	13	0.73	98	1	0	0	0	0	0	1	1	0	1	158.4	65.7	88	101	26.2	1	104	69	15.89	24.1857	0	109.8	1	0	0		5.5	5	0.14
867	2	58.4712	6.46	13.3	271	4.3	0.8	132	20	33	22	162	69	128	67	10	0.48	96	1	1	1	0	0	0	1	1	1	0	155.8	67.6	96	102	27.8	1	124	83	16.35	24.1864	0	102	1	0	0		5.8	3.4	1.22
868	2	39.9288	10.66	15.8	349	4.4	0.8	53	35	47	43	316	224	223	47	10	0.69	91	1	0	1	0	0	1	1	1	0	1	161.9	75.2	91	100	28.7	1	136	90	18.19	24.1888	0	158.4	1	0	0		5.6	5.1	0.21
869	2	65.4685	3.66	14.4	208	4.1	0.9	94	39	41	22	229	157	101	52	15	0.54	139	1	1	1	1	1	0	0	0	0	0	160.2	66.6	95	98	26	1	128	72	16.11	24.1892	0	142.4	1	0	0		7.2	3.6	0.08
870	2	56.3178	3.82	12.9	247	4.3	0.9	88	23	16	8	209	145	76	49	10	0.73	97	0	0	0	0	0	1	0	1	0	0	150.7	53.7	76.5	91.5	23.6	0	99	66	12.99	24.1899	0	91	0	0	0		5.8	5	0.07
871	2	65.5562	5.73	12.5	284	4.1	0.9	71	20	27	23	238	153	176	50	12	0.55	105	1	0	0	0	0	0	1	1	0	1	158.8	66.1	90	102	26.2	1	116	73	15.99	24.1906	0	117.5	1	0	1		5.2	4.3	0.23
872	2	76.3014	11.12	13.2	217	3.7	1.1	67	120	135	27	202	119	63	70	13	0.8	94	0	0	0	0	0	0	1	1	1	0	140	43.9	73.5	86	22.4	0	93	67	10.62	24.1913	0	86.9	0	0	0		5.6	2.2	2.81
873	2	25.9973	3.69	13.9	305	3.9	0.6	54	18	11	10	132	86	38	38	9	0.67	81	0	0	0	0	0	1	0	1	0	0	161.4	63.6	79	104	24.4	0	113	74	15.39	24.1981	0	90.8	0	0	0		5.2	5.1	0.23
874	2	82.0767	4.76	12.4	229	4.5	0.8	84	23	23	23	161	98	58	51	22	0.74	129	1	1	1	0	1	0	0	0	0	0	148.9	56.4	89	92	25.4	1	127	74	13.65	24.2021	0	87.2	0	1	1		7.1	5.8	0.04
875	2	61.0055	4.92	13.6	318	4.5	1	94	30	26	16	243	167	55	65	17	0.89	95	0	0	1	0	0	0	0	0	0	0	152.3	54	79	90	23.4	0	153	95	13.07	24.2037	0	79.6	0	0	1		5.9	5.4	0.03
876	2	58.4164	6.19	13.4	278	4.4	1.7	53	22	19	11	182	117	105	44	13	0.65	110	0	1	1	1	1	1	0	1	0	0	150.7	57.8	86	94	25.5	1	107	81	13.99	24.2042	0	121.6	1	0	0		7	4.6	0.04
877	2	44.4767	6.74	14.2	290	4.5	1.2	37	35	53	30	239	164	111	53	17	0.63	99	0	0	0	0	0	0	0	0	0	0	153.6	64.2	86	97	27.2	1	131	88	15.54	24.2056	0	103.6	1	0	0		5.5	4.7	0.15
878	1	39.4603	7.55	14.5	328	4.2	1.1	65	32	28	15	210	138	116	49	13	1.07	84	1	0	0	0	0	0	0	0	0	0	174.5	119.6	118	123	39.3	1	133	86	31.42	26.2709	1	168	1	0	0		5.5	6.6	0.7
879	1	50.3534	6.52	17	216	4.7	0.8	58	26	35	28	255	176	202	39	18	1.02	93	0	0	1	0	0	1	1	1	0	1	167.2	86.3	101	108	30.9	1	135	96	22.69	26.292	1	171.6	1	1	1		5.2	7.4	0.09
880	2	74.1808	6.87	14.5	280	4.1	0.4	82	49	61	31	173	83	101	70	18	0.86	97	0	1	1	0	0	0	0	0	0	0	144.2	56.8	85	96	27.3	1	130	65	13.75	24.2077	0	97.4	0	0	0		5.8	4.6	1.12
881	2	66.5507	5.69	15.2	303	4.7	1.1	79	26	20	21	210	126	100	64	13	0.73	86	0	1	1	0	0	0	1	1	1	0	162.9	58.9	83.5	91	22.2	0	118	83	14.26	24.2105	0	92.5	0	0	0		5.6	4.4	0.08
882	2	63.589	3.57	13.3	262	4.6	1.1	105	24	15	13	211	125	49	76	14	0.66	97	0	1	1	0	0	0	1	1	1	0	156.6	56.5	79	90	23	0	116	75	13.68	24.2124	0	109.2	1	0	0		5.8	3.6	0.1
883	2	49.6877	7.4	14.2	275	4.1	0.5	45	16	23	17	182	98	179	48	13	0.6	98	1	1	1	0	0	1	1	1	0	1	159.8	73.8	92	102	28.9	1	119	76	17.87	24.2141	0	161.6	1	0	0		5.6	3.6	0.02
884	2	56.7315	6.2	14.6	283	4.8	1	100	31	33	29	235	168	96	48	11	0.75	115	0	0	1	0	0	1	0	1	0	0	148.9	54.3	82	96	24.5	0	131	97	13.15	24.2173	0	108.3	1	0	0		6	3.8	0.33
885	2	32.674	5.71	13.3	303	4.3	0.6	88	19	6	8	202	103	85	82	17	0.49	84	0	0	0	0	0	0	0	0	0	0	158.3	56.4	78	95	22.5	0	104	73	13.66	24.2199	0	72.5	0	0	0		4.9	4.7	0.13
886	2	54.2493	7.91	15	365	4.3	0.9	152	28	41	56	186	112	134	47	10	0.66	98	1	1	1	0	0	1	0	1	0	0	159.5	75.1	90	104	29.5	1	142	96	18.19	24.221	0	150.5	1	0	1		5.6	5.5	0.1
887	2	55.0822	3.97	14.2	252	4.4	0.8	90	25	24	10	210	141	73	54	9	0.6	112	0	0	0	0	0	0	0	0	0	0	156.4	54	77	95	22.1	0	111	75	13.08	24.2222	0	114.8	1	0	0		5.7	3.5	0.04
888	2	65.8274	6.07	12.4	141	4.1	0.8	62	20	9	12	170	96	213	31	9	0.63	104	0	0	0	0	0	1	1	1	0	1	157	56.6	84	94	23	0	126	70	13.71	24.2226	0	90.8	0	0	0		5.8	4.5	0.27
889	1	80.2274	5.31	12.6	240	3.6	1	65	42	41	37	159	91	140	40	20	0.95	103	1	1	1	0	0	0	0	0	0	0	168.2	85.4	107	111	30.2	1	144	60	22.46	26.2998	1	233.8	1	0	0		6	6.9	0.15
890	2	75.7123	5.88	14.2	235	4.3	0.8	44	24	24	18	200	120	97	61	15	0.54	91	0	0	0	0	0	0	0	0	0	0	148.2	52.8	86	93	24	0	122	63	12.79	24.2235	0	73.8	0	0	0		5.6	3.9	0.08
891	2	55.2521	7.04	14.4	290	4	0.7	77	26	24	18	284	193	73	76	13	0.61	93	0	0	0	0	0	0	0	0	0	0	154.6	52.8	77	88	22.1	0	121	86	12.79	24.2235	0	105.4	1	0	0		5.5	4.3	0.04
892	2	36.1863	4.12	12.8	272	4	0.5	45	33	20	13	167	98	102	49	9	0.65	89	1	0	0	0	0	1	0	1	0	0	161.7	75.7	90	102	29	1	89	64	18.34	24.2272	0	148	1	0	0		5.3	3.9	0.2
893	2	63.4329	4.36	15.3	206	4.3	0.7	71	30	27	18	216	148	92	50	14	0.72	89	0	0	0	0	0	0	0	0	0	0	158.3	67.4	87	97	26.9	1	105	78	16.33	24.2285	0	115.7	1	0	1		5.8	8	0.2
894	2	59.0137	4.94	14.2	237	4.3	0.9	113	22	20	8	291	200	132	65	8	0.67	89	0	0	0	0	0	0	1	1	1	0	151.9	57.7	80	95	25	1	111	75	13.98	24.2288	0	80.8	0	0	0		5.4	3.9	0.11
895	2	61.2877	5.15	13.4	277	4.1	1	67	24	18	11	194	125	78	53	13	0.71	91	0	0	0	0	0	0	1	1	1	0	149.9	57.2	85	92	25.4	1	134	85	13.86	24.2308	0	99.9	0	0	1		5.9	2.8	0.02
896	2	64.0466	4	15.1	199	4.4	1.1	68	36	50	15	165	93	98	52	14	0.55	114	1	0	0	1	1	0	0	0	0	0	149.4	60.5	88	100	27.1	1	116	73	14.66	24.2314	0	110.4	1	0	0		6.2	5.2	0.15
897	2	67.0904	4.21	12.6	296	3.8	1	77	34	47	32	141	82	60	47	14	0.51	98	0	0	0	0	0	1	0	1	0	0	153	60.5	83	97	25.8	1	120	66	14.66	24.2314	0	115.7	1	0	0		5.8	3.8	0.04
898	2	54.2164	6.5	14	231	4.5	1	88	20	14	16	159	97	64	49	13	0.75	102	1	0	1	0	0	1	0	1	0	0	162.6	77.5	98	104	29.3	1	144	90	18.78	24.2323	0	142.6	1	0	0		5.3	6	0.45
899	2	53.5644	6.46	14.1	255	4.3	0.9	59	23	17	20	190	120	74	55	11	0.8	90	0	0	0	0	0	0	0	0	0	0	153.1	59.3	83	94	25.3	1	104	78	14.37	24.2327	0	87.3	0	0	0		5.6	4	0.04
900	2	60.5726	4.09	13.4	304	4.6	0.7	92	30	23	12	163	113	41	42	11	0.66	85	0	1	1	0	0	1	0	1	0	0	156.9	57.6	83	95	23.4	0	118	76	13.96	24.2361	0	83.8	0	0	1		5.8	5.7	0.08
901	2	42.3342	6.12	12.6	336	4.3	0.7	81	20	16	16	249	175	96	55	13	0.57	95	1	0	0	0	0	0	0	0	0	0	162.8	84.7	105	109	32	1	127	86	20.53	24.2385	0	122.7	1	0	1		5.8	5.4	2.28
902	2	40.0164	10.32	13.2	284	4.4	0.7	92	30	40	49	210	138	70	58	13	0.83	113	1	0	0	0	0	0	0	0	0	0	163.5	76.2	96	107	28.5	1	123	81	18.47	24.2388	0	92.9	0	0	0		6.1	6.3	1.2
903	1	19.5918	8.62	16.3	276	4.4	0.6	93	29	16	76	183	103	152	50	11	0.85	84	1	1	1	0	0	0	1	1	0	1	171.7	98.8	107	113	33.5	1	135	89	26.06	26.3765	1	159.5	1	1	1		5.6	8.2	0.71
904	2	59.6603	3.02	13.7	216	4.1	0.7	46	23	19	18	282	206	85	59	12	0.7	91	0	0	0	0	0	0	1	1	1	0	150.9	52.6	77	97	23.1	0	93	62	12.75	24.2395	0	62.2	0	0	0		5.7	3.2	0.02
905	2	53.6301	3.89	13.6	194	4.2	0.7	51	19	14	15	178	100	122	54	13	0.68	92	0	0	0	0	0	0	0	0	0	0	151.4	50.2	83.5	87	22	0	103	86	12.17	24.243	0	62.3	0	0	1		5.4	4.9	0.02
906	2	66.9342	4.7	12.2	293	4.2	1.1	49	31	18	11	203	128	120	51	13	0.73	89	0	0	0	0	0	0	0	0	0	0	152.6	52	83	92	22.3	0	104	72	12.61	24.25	0	87.3	0	0	0		5.3	3.7	0.09
907	2	58.7699	4.21	13.1	273	4.2	0.8	51	21	18	13	246	163	109	61	15	0.56	105	1	0	1	0	0	0	0	0	0	0	151.9	60	92.5	95	26	1	135	93	14.55	24.25	0	91.1	0	0	1		5.6	3	0.04
908	2	37.4055	6.5	12.8	338	4.5	0.7	65	20	13	13	184	99	82	69	7	0.66	94	0	0	0	0	0	0	0	0	0	0	162	62.8	87	102	23.9	0	103	75	15.23	24.2516	0	89.2	0	0	0		5.1	5.4	0.12
909	2	56.1781	5.14	14	360	4.5	0.9	65	30	32	20	231	171	104	39	14	0.81	87	0	0	0	0	0	1	1	1	1	0	150.2	52.5	80	90	23.3	0	102	72	12.7332	24.2538	0	77.7196	0	0	0		5.8	5.2	0.05
910	2	64.4247	4.16	14.9	256	4.4	0.8	74	25	25	25	258	180	143	49	17	0.61	107	0	1	1	0	0	1	0	1	0	0	145.5	55	87	89.5	25.8	1	134	84	13.34	24.2545	0	115.9	1	0	0		6.1	6.2	0.62
911	2	53.9589	6.57	13.7	193	4.1	1.4	68	31	42	24	211	138	142	45	12	0.74	105	1	0	0	0	0	1	0	1	0	0	156.9	70.7	99	103	28.7	1	124	80	17.15	24.2574	0	138.1	1	0	0		5.7	5.5	0.13
912	1	57.874	6.13	18.2	251	4.4	1.4	88	147	159	87	217	149	182	32	14	1.24	155	1	1	1	0	1	1	1	1	0	1	172.8	106.2	114	117	35.6	1	121	93	28.02	26.3842	1	241	1	0	0		7	9.8	0.21
913	2	36.7918	4.58	13.9	316	4.3	0.7	57	34	41	45	198	125	71	59	10	0.57	99	1	0	0	0	0	0	0	0	0	0	164.2	84	107	108	31.2	1	115	78	20.38	24.2619	0	135.7	1	0	1		5.9	5.5	0.53
914	2	67.8685	7.41	13	201	4.5	0.6	48	29	22	18	166	91	29	69	16	0.91	78	0	0	0	0	0	0	1	1	1	0	150.2	48.8	70	90	21.6	0	95	69	11.84	24.2623	0	74.1	0	0	0		5.4	6	0.24
915	2	44.5397	7.08	13.6	371	4.7	0.7	68	35	33	136	221	90	207	90	8	0.7	99	0	0	0	0	0	0	1	1	0	1	158.1	58.4	87	98	23.4	0	112	80	14.17	24.2637	0	98.9	0	0	1		5.4	5	0.05
916	1	68.1479	5.85	16.2	157	4.1	1.1	74	31	58	62	159	90	146	40	16	0.95	90	1	0	0	0	0	0	0	0	0	0	165.2	77.6	103	105	28.4	1	120	81	20.48	26.3918	1	116.4	1	0	1		5.1	4.6	0.04
917	2	79.2795	4.31	11.6	262	4	0.6	72	27	14	10	189	120	55	58	16	0.76	94	1	1	1	0	0	0	0	0	0	0	147.6	50.4	90	93	23.1	0	125	64	12.23	24.2659	0	84.7	0	0	0		6.1	1.7	0.02
918	2	63.5205	11.46	15.7	220	4.2	0.7	87	22	8	17	248	178	149	40	14	0.7	117	0	0	0	0	0	1	0	1	0	0	155.1	51.8	78	92	21.5	0	95	56	12.57	24.2664	0	91	0	1	0		6.5	4.3	0.13
919	2	32.5671	8.74	14.5	405	4.6	1	64	17	13	16	177	99	116	55	8	0.62	96	0	0	0	0	0	0	0	0	0	0	161	66.8	87	106	25.8	1	102	67	16.21	24.2665	0	77.6	0	0	1		5.5	4.9	0.22
920	2	36.6521	4.76	12.6	295	4.2	0.6	54	22	21	17	239	156	67	70	9	0.65	88	1	0	0	0	0	0	0	0	0	0	161.4	67.5	95	108	25.9	1	110	77	16.38	24.2667	0	90	0	0	1		5	4.7	0.08
921	2	28.4904	5.92	13.8	220	4.1	0.9	53	19	10	8	161	93	71	54	11	0.54	86	0	0	0	0	0	0	0	0	0	0	148.5	46.4	66.5	87	21.2	0	106	72	11.26	24.2672	0	45.8	0	0	0		5.1	4.2	0.03
922	2	72.6329	5.02	14.2	234	4.4	0.6	62	27	29	12	119	36	58	71	12	0.68	93	0	0	0	0	0	0	1	1	1	0	147.3	45.2	78	90	20.8	0	94	68	10.97	24.2699	0	81	0	0	0		5.7	4.6	0.04
923	2	76.2521	5.47	13.4	255	4.4	0.5	103	15	14	9	182	109	80	57	24	0.69	146	1	1	1	1	1	0	0	0	0	0	151.1	56.2	92	91	24.6	0	152	89	13.64	24.2705	0	103.5	1	0	0		6.5	3.5	0.17
924	1	69.7233	7.61	14.5	273	4.2	0.8	76	29	38	40	184	104	168	46	12	0.87	191	1	1	1	1	1	0	1	1	1	1	160.9	80.4	103	105	31.1	1	126	61	21.23	26.4055	1	127.5	1	0	0		7.6	6	0.07
925	2	68.474	6.59	13.9	200	4.5	0.7	54	25	18	12	237	140	60	85	18	0.75	85	1	1	1	0	0	0	0	0	0	0	162.1	65.3	89	97	24.9	0	119	73	15.85	24.2726	0	132.2	1	0	0		5.3	5.1	0.06
926	1	34.1507	5.91	15.3	284	4.6	0.8	140	83	76	62	156	106	65	37	9	0.61	89	0	0	1	0	0	1	0	1	0	0	167.2	76.2	94	98	27.3	1	146	81	20.13	26.4173	1	121.3	1	0	0		5.9	8.9	0.1
927	2	61.2877	4.84	13.9	285	4.5	0.9	79	44	56	16	141	65	132	50	13	0.72	107	1	0	0	0	0	0	1	1	1	0	151.9	67.1	92	104	29.1	1	134	87	16.29	24.2772	0	105.5	1	0	0	8.2	6	4.2	0.09
928	2	35.5205	13.8	12.9	330	4.9	1.3	69	20	17	31	201	111	102	70	7	0.64	82	0	0	0	0	0	0	0	0	0	0	161.6	68.7	84.5	104	26.3	1	123	79	16.68	24.2795	0	138.1	1	0	1		5.3	5.8	14.43
929	2	59.6658	5.67	13.6	292	4.6	0.8	84	35	26	40	196	98	203	57	16	0.73	85	0	1	1	0	0	0	1	1	1	1	147.3	54.2	80	92	25	1	128	73	13.16	24.2804	0	98.2	0	0	1		5.7	6.4	0.04
930	1	61.5068	5.47	16.3	310	4.5	1	91	30	38	33	213	136	54	66	18	1.03	89	0	0	0	0	0	0	0	0	0	0	154.4	60.3	95	93	25.3	1	112	83	15.93	26.4179	1	109.5	1	0	1		5	6.1	0.06
931	2	38.9863	9.3	16.1	338	4.7	0.9	87	30	45	31	224	149	204	34	8	0.53	108	1	0	0	0	0	1	1	1	0	1	160.8	81.3	96	105	31.4	1	117	87	19.74	24.2804	0	132.1	1	1	0		6.1	5.2	0.74
932	2	57.8904	6.56	14.5	330	4.6	1.2	68	22	18	18	250	166	133	57	15	0.59	85	0	1	1	0	0	0	1	1	1	0	151.8	56	87	94	24.3	0	116	87	13.6	24.2857	0	84.3	0	0	1		5.4	5.1	0.54
933	2	33.1616	8.02	12.3	433	4.4	1.2	62	23	27	12	280	209	107	50	10	0.64	81	0	0	0	0	0	0	1	1	1	0	152.6	55.3	81	93	23.7	0	121	89	13.43	24.2857	0	91.1	0	0	0		5	5.6	0.02
934	2	58.0466	5	13.6	307	4	0.7	85	19	21	10	227	155	88	54	10	0.61	95	0	0	0	0	0	0	0	0	0	0	155.7	60.9	86	102	25.1	1	133	84	14.79	24.2857	0	96.7	0	0	0		5.3	2.7	0.12
935	2	79.2438	6.32	13.6	254	4.3	0.9	64	24	20	8	212	146	129	40	16	0.67	93	0	1	1	0	0	1	0	1	0	0	148	56.2	83	90	25.7	1	118	66	13.65	24.2883	0	74.3	0	0	0		5.4	3.9	0.04
936	2	56.8493	5.72	15.5	274	4.2	1	64	19	16	13	168	101	59	55	11	0.55	100	1	1	1	0	0	0	0	0	0	0	152.4	59	93	95	25.4	1	106	73	14.34	24.3051	0	135.7	1	0	0		5.7	1.9	0.41
937	2	45.674	5.4	14.2	264	4.4	0.5	60	21	23	38	161	100	80	45	9	0.61	96	0	0	0	0	0	1	0	1	0	0	157.8	54.3	87	94	21.8	0	110	84	13.2	24.3094	0	83.9	0	0	0		5.6	5.4	0.3
938	1	64.6137	4.86	14	238	4.4	1	98	32	28	18	160	106	61	42	17	0.88	80	0	1	1	0	0	0	0	0	0	0	146.3	48.6	73	91	22.7	0	123	89	12.84	26.4198	1	48.7	0	0	0		5.2	6	0.22
939	2	66.1644	4.46	11.6	269	4.4	1.2	76	21	12	10	233	162	90	53	17	0.72	92	0	0	0	0	0	0	0	0	0	0	142.1	43.6	82	87.5	21.6	0	108	61	10.6	24.3119	0	77.3	0	0	1		5.8	4.9	0.05
940	2	39.6658	6.7	14.8	329	4.6	0.6	53	21	27	24	298	188	339	42	9	0.58	103	1	0	0	0	0	1	1	1	0	1	163.3	84.4	98.5	107.5	31.8	1	130	84	20.52	24.3128	0	172.7	1	1	1		5.5	5.9	0.03
941	2	76.3534	7.41	12.4	314	4.2	1	57	27	19	16	182	89	74	78	15	0.62	93	0	1	1	0	0	0	1	1	1	0	151.8	56.1	83	89.5	24.3	0	174	82	13.64	24.3137	0	130.3	1	0	0		6	3.5	0.04
942	1	32.2986	8.71	15.2	191	4.4	1.1	100	96	170	89	246	184	95	43	12	0.84	122	1	0	1	0	0	0	0	0	0	0	171.3	93.6	103	109	31.9	1	135	91	24.75	26.4423	1	180.8	1	0	1		6.7	8.3	1.03
943	2	66.337	5.45	14.2	223	4.4	1	105	30	23	15	236	151	169	51	14	0.57	308	0	0	0	0	1	0	1	1	0	1	155	54.9	81	87	22.9	0	114	73	13.35	24.3169	0	93.8	0	0	0		14.1	2.7	0.06
944	2	62.3781	6.01	15	308	4.3	0.9	55	31	29	15	173	95	119	54	7	0.58	75	0	0	0	0	0	0	1	1	1	0	154.3	49.1	81	91	20.6	0	93	68	11.94	24.3177	0	76.5	0	0	0		5.1	3.8	0.05
945	2	61.1644	4.2	13.8	216	4.3	0.6	53	27	22	29	227	134	84	76	13	0.66	86	1	0	0	0	0	0	0	0	0	0	160.5	62.3	88	99	24.2	0	115	76	15.15	24.3178	0	114.8	1	0	0		5.4	4.3	0.07
946	2	78.6904	5.29	12.8	228	4.1	0.6	79	24	12	7	157	93	149	34	11	0.72	89	0	1	1	0	0	1	0	1	0	0	147.2	46.3	77	83	21.4	0	111	72	11.26	24.3197	0	85.3	0	0	0		5.7	6.5	0.13
947	2	46.2438	4.63	9.2	412	4.1	0.9	49	18	10	13	213	137	134	49	10	0.61	102	0	0	0	0	0	1	0	1	0	0	153.7	58.8	85	98	24.9	0	107	68	14.3	24.3197	0	85.4	0	0	1		5.8	4.5	0.08
948	2	59.6685	5.22	13.7	319	4.3	0.8	66	20	18	9	209	121	173	53	13	0.63	89	0	0	0	0	0	0	1	1	0	1	154.6	52.3	83	93	21.9	0	119	83	12.72	24.3212	0	105.3	1	0	0		5.3	4.2	0.05
949	1	42.1534	7.3	14.7	187	4.3	1	140	43	49	35	160	71	261	37	15	1	186	1	1	1	1	1	1	1	1	0	1	179.5	110.7	115.5	109	34.4	1	153	93	29.28	26.4499	1	175.7	1	0	0		9.2	6.5	0.29
950	1	41.663	6.4	15.1	246	4.2	0.9	61	15	20	25	215	113	306	41	14	0.86	83	1	0	0	0	0	0	1	1	0	1	172.3	92.6	111	106	31.3	1	118	84	24.54	26.5011	1	160.4	1	1	1		5.8	6.7	0.22
951	2	78.1562	6.32	13.8	347	4.1	0.8	56	35	25	16	188	122	53	55	13	0.57	79	0	1	1	0	0	0	1	1	1	0	152.2	51.6	81	95	22.3	0	130	84	12.55	24.3217	0	111.1	1	0	0		5.8	4.3	0.2
952	2	56.674	4.87	12.9	174	4.5	1.6	58	20	22	38	222	144	79	62	15	0.69	89	0	0	0	0	0	0	0	0	0	0	161.4	66.4	79	97.5	25.6	1	101	74	16.15	24.3223	0	113.8	1	0	1		5.6	5.3	0.02
953	1	43.6274	7.78	14.5	201	4.4	1.1	75	25	43	59	257	191	105	45	12	0.95	81	0	1	1	0	0	0	1	1	1	0	162	85.2	101.5	107.5	32.5	1	141	96	22.59	26.5141	1	152.6	1	1	1		6.2	6.8	2.94
954	2	46.9973	8.62	13.9	220	4.1	1.1	67	33	31	10	201	123	75	63	12	0.62	86	0	0	0	0	0	0	0	0	0	0	159.1	62	83	94	24.5	0	106	78	15.08	24.3226	0	93.7	0	0	0		5.4	5.7	1.11
955	2	59.3205	4.38	14.5	345	4.1	0.7	90	19	16	26	259	171	150	58	15	0.6	91	0	0	1	0	0	0	1	1	1	1	158.3	63.8	84	102	25.5	1	140	92	15.52	24.326	0	108.6	1	0	0	6.4	5.5	4.7	0.09
956	2	70.526	4.72	13.9	184	4.5	1.5	107	44	30	22	147	77	52	60	10	0.67	96	0	1	1	0	0	0	1	1	1	0	146	53.1	82	94	24.9	0	100	64	12.92	24.3315	0	110.8	1	0	0		5.9	3.6	0.05
957	2	47.526	4.07	13.1	315	4.3	1	67	21	21	12	230	156	122	50	11	0.6	102	0	0	1	0	0	0	0	0	0	0	164.3	71.8	86	95	26.6	1	135	98	17.47	24.3315	0	113.6	1	0	1		5.8	4.5	0.43
958	2	40.0274	6.64	13.4	303	4.2	1	60	20	13	18	211	131	65	67	11	0.65	78	1	0	0	0	0	0	0	0	0	0	157.3	67.1	90	107	27.1	1	104	75	16.33	24.3368	0	108	1	0	0		5.7	4.4	0.17
959	2	40.0959	5.97	10.7	372	4.4	0.5	72	22	14	21	179	88	161	59	9	0.64	103	1	0	0	0	0	0	1	1	1	1	161.6	66.4	88	100	25.4	1	113	75	16.16	24.3373	0	118.5	1	0	1	12.6	5.6	3.8	0.02
960	2	51.1342	5.84	14.2	274	4.1	0.7	72	25	32	35	239	129	290	52	12	0.66	103	1	0	0	0	0	0	1	1	0	1	160.9	72.6	95	103	28	1	113	76	17.67	24.3388	0	122	1	0	1		5.5	5	0.12
961	2	75.2986	4.2	13.4	273	4.1	0.8	64	23	15	15	325	249	74	61	18	0.88	114	0	1	1	0	0	0	1	1	1	0	156.7	56.4	74	93	23	0	119	80	13.73	24.344	0	101.1	1	0	0		6.1	5	0.03
962	2	54.0438	5.34	14.3	246	4.3	0.7	52	24	22	12	213	152	52	51	14	0.73	94	0	0	0	0	0	0	0	0	0	0	154.1	62.6	85	97	26.4	1	110	75	15.24	24.345	0	125	1	0	1		5.8	6.5	0.15
963	2	72.3151	5.46	13.2	187	4.4	0.9	61	64	75	27	155	75	123	55	10	0.78	119	0	0	0	1	1	0	0	0	0	0	152.8	47.4	77	86	20.2	0	105	70	11.54	24.346	0	99.2	0	0	0		5.9	2.7	0.08
964	2	56.3123	5.45	11.8	318	4.2	0.5	89	20	18	39	224	147	130	51	10	0.64	89	0	0	0	0	0	0	0	0	0	0	153.2	56.1	87	88	23.9	0	115	74	13.66	24.3494	0	105	1	0	1		5.5	3.6	0.32
965	2	34.4356	11.08	14.5	397	4.2	0.6	65	12	12	11	142	83	91	41	12	0.53	96	1	0	1	0	0	1	0	1	0	0	164	78.6	94	101	29.2	1	124	91	19.14	24.3511	0	113.2	1	0	0		5.6	5	0.34
966	2	39.4192	6.44	12.8	265	4.5	1.3	39	20	10	10	182	126	64	43	10	0.74	97	1	0	0	0	0	1	0	1	0	0	151.6	61.8	95	102	26.9	1	106	75	15.05	24.3528	0	92.5	0	0	0		5.6	5.3	0.27
967	2	55.8164	6.23	15	276	4.5	1.2	109	61	109	37	247	172	114	52	13	0.78	173	1	0	0	0	1	0	0	0	0	0	154.4	70.5	91	107	29.6	1	136	86	17.17	24.3546	0	104.1	1	0	0		8.4	4.7	0.12
968	2	30.5315	3.94	12.7	372	4.4	1.4	55	13	9	7	190	110	49	70	11	0.65	92	0	0	0	0	0	0	0	0	0	0	155.9	55.3	74	98	22.8	0	102	72	13.47	24.358	0	60.9	0	0	0		5.2	4.4	0.05
969	1	25.8767	8.43	15.9	277	4.4	1	62	34	49	32	158	88	135	43	11	0.79	146	1	1	1	1	1	0	0	0	0	0	182	127.6	122	120	38.5	1	156	109	33.84	26.5204	1	200.1	1	1	1		6.6	7.3	2.29
970	2	40.4301	5.17	14.5	298	4.3	0.5	66	18	10	9	197	123	116	51	9	0.89	106	0	0	1	0	0	0	0	0	0	0	159.3	68.6	77	99	27.1	1	112	90	16.71	24.3586	0	105.6	1	0	1		6.1	4.1	0.03
971	2	54.3753	3.8	13.1	225	4.1	0.8	64	23	20	9	314	245	94	50	12	0.51	91	0	0	0	0	0	0	1	1	1	0	159.1	57.1	75	96	22.6	0	115	71	13.91	24.3608	0	72.9	0	0	0		5.3	4.5	0.04
972	2	28.1534	3.61	13.1	176	4.4	0.7	49	20	13	14	168	103	39	57	12	0.43	82	1	0	0	0	0	0	0	0	0	0	162.1	76.1	97	101	29	1	125	73	18.54	24.3627	0	81.6	0	0	1		4.8	4.2	0.13
973	2	67.7671	4.44	13.6	153	4.3	0.8	67	24	16	10	146	86	50	50	9	0.68	94	1	0	0	0	0	0	1	1	1	0	152.3	60.5	88	97.5	26.2	1	111	76	14.74	24.3636	0	81.8	0	0	0		5.6	4.7	0.03
974	2	69.789	6.59	13.6	259	4	0.6	121	31	29	28	148	77	171	37	15	0.57	95	1	1	1	0	0	1	1	1	0	1	154.8	63.7	88	98	26.6	1	156	91	15.52	24.3642	0	136.2	1	0	0		5.8	3	0.17
975	1	58.0767	6.77	17.5	293	4.5	1.1	69	23	24	33	153	62	203	50	15	0.87	139	0	0	0	1	1	0	1	1	1	1	173.3	71.1	84.5	93.5	23.8	0	110	75	18.86	26.526	1	325.9	1	0	1		6.8	5.2	0.06
976	2	75.8055	4.07	13.6	259	4	0.6	74	24	19	38	165	87	68	64	16	0.69	100	1	1	1	1	1	0	1	1	1	0	149.2	59.8	97	100	26.9	1	116	65	14.57	24.3645	0	69.2	0	1	0		6.3	5.1	0.03
977	2	56.7288	3.94	13.4	281	4.4	0.8	91	37	42	30	177	85	70	78	8	0.41	92	0	0	0	0	0	0	0	0	0	0	148.5	53.6	84	96	24.3	0	118	83	13.06	24.3657	0	68.3	0	0	1		5.1	3.4	0.02
978	2	54.8712	8.05	13.8	192	4.8	1.6	80	23	18	13	142	67	56	64	13	0.64	85	0	1	1	0	0	0	1	1	1	0	153.7	54	82	98	22.9	0	140	92	13.16	24.3704	0	64	0	0	0		5.5	5.1	0.05
979	2	50.8822	3.93	12.8	234	4.4	0.9	63	33	29	77	208	123	63	72	14	0.79	89	0	0	0	0	0	0	0	0	0	0	153.8	55.6	84	94.5	23.5	0	120	82	13.55	24.3705	0	76.8	0	0	1		5.6	4.7	0.02
980	2	48.8219	6.56	14.7	303	4.5	0.8	62	22	14	11	237	148	81	73	15	0.68	88	0	0	0	0	0	0	0	0	0	0	151.1	56.5	73	87	24.7	0	110	81	13.77	24.3717	0	105.6	1	0	1		5.3	4.2	0.08
981	2	51.8959	3.02	13.2	174	4.4	1.1	80	21	15	15	235	157	87	61	11	0.65	94	0	0	0	0	0	0	0	0	0	0	155.6	63.8	87	102	26.4	1	115	78	15.55	24.373	0	83.2	0	0	0		5.2	3.9	0.07
982	2	56.5288	5.3	13.1	220	4.3	0.6	83	21	15	12	197	110	63	74	16	0.64	92	0	0	0	0	0	0	0	0	0	0	153.3	52.1	81.5	99	22.2	0	105	81	12.7	24.3762	0	73.2	0	0	0		5.3	4.3	0.06
983	2	67.4411	8.52	14.8	353	4	1	99	32	30	14	223	150	80	57	21	0.83	91	1	0	1	0	0	0	0	0	0	0	156.8	67.3	94	100	27.4	1	126	90	16.41	24.3834	0	126.4	1	0	0		5.7	3.9	0.14
984	2	39.3342	6.56	13	277	4.3	1	58	17	12	12	168	86	79	66	13	0.77	80	0	0	0	0	0	0	0	0	0	0	159	67.7	71	96	24.4	0	102	68	16.51	24.387	0	72.7	0	0	0		5.3	5.6	0.08
985	2	44.4192	4.95	13.6	257	4.2	1.6	43	23	12	10	186	98	55	77	9	0.69	84	0	0	0	0	0	0	0	0	0	0	157.6	58.8	82	93	23.6	0	103	73	14.34	24.3878	0	79	0	0	1		5	4.1	0.02
986	2	71.011	4.2	13.6	263	4.3	1.4	79	25	22	12	175	99	95	57	15	0.84	105	0	1	1	1	1	0	1	1	1	0	151	59	87	93	25.9	1	121	76	14.39	24.3898	0	87.4	0	0	0		6.3	5.5	0.05
987	2	87.7425	4.27	11.9	200	4	0.7	47	29	18	14	191	98	93	74	12	0.62	112	0	0	0	0	0	0	1	1	1	0	147.6	41	79	89	18.8	0	137	70	10	24.3902	0	56.3	0	0	0		5.3	4.7	0.02
988	2	61.7479	4.78	12.3	208	4.4	0.9	69	33	14	13	255	167	111	66	13	0.75	79	1	0	0	0	0	0	0	0	0	0	151.5	54.1	89	97	23.6	0	93	68	13.2	24.3993	0	84.7	0	0	1		5.6	4.7	0.12
989	2	66.3808	4.07	13.1	190	4.2	1.3	66	29	19	8	126	63	53	52	10	0.67	82	0	1	1	1	1	0	1	1	1	0	159.8	63.6	85	100	24.9	0	116	71	15.52	24.4025	0	112.2	1	0	0		5.8	6.5	0.08
990	2	28.4904	8.96	13	324	4.7	0.7	55	19	13	11	207	124	75	68	9	0.63	65	0	0	0	0	0	0	0	0	0	0	152.8	47.9	69	96	20.5	0	101	68	11.69	24.405	0	50.7	0	0	0		5.1	5.2	0.11
991	2	40.1836	5.3	11.8	277	4.2	0.7	61	38	37	19	160	100	26	55	6	0.57	64	0	0	0	0	0	0	0	0	0	0	155.1	63.7	75.5	100	26.5	1	94	67	15.55	24.4113	0	80	0	0	0		5.5	3.4	0.09
992	1	45.9644	7.68	16.9	177	5	1.3	86	32	48	70	213		427	36	12	0.76	97	0	0	0	0	0	1	1	1	0	1	159	69.8	99	90	27.6	1	130	83	18.52	26.533	1	154.9	1	1	1		5.2	6.5	0.24
993	2	36.9808	6.34	15.8	140	4.4	0.8	51	25	21	16	184	111	71	59	10	0.73	83	0	0	0	0	0	0	0	0	0	0	161.5	67.1	80	103.5	25.7	1	111	79	16.38	24.4113	0	109.8	1	0	1		5.3	4.3	0.11
994	2	55.0877	7.05	13.7	335	4.2	0.8	58	26	34	22	232	134	206	57	15	0.66	91	1	0	0	0	0	0	1	1	0	1	149.7	62.1	89	92	27.6	1	121	79	15.16	24.4122	0	104.5	1	0	0		6	7.5	0.06
995	2	33.9397	7.14	14.7	285	4.2	0.6	34	17	11	12	166	95	72	57	10	0.63	90	0	0	0	0	0	0	0	0	0	0	161.8	67.5	86	104	25.8	1	105	74	16.48	24.4148	0	103.2	1	0	0		5.7	3.6	0.05
996	1	63.4767	6.63	15.1	256	4.3	1.5	85	27	20	31	209	137	74	57	12	1	88	0	0	0	0	0	0	0	0	0	0	157.9	65.6	91	91	26.3	1	127	79	17.41	26.5396	1	132.3	1	1	1		5.8	6.6	0.14
997	2	66.789	3.48	12.8	225	4.1	0.8	55	28	31	14	208	88	119	96	11	0.55	98	0	0	0	0	0	0	0	0	0	0	150.8	53.9	82	94	23.6	0	107	80	13.16	24.4156	0	104.4	1	0	1		5.4	4.8	0.21
998	2	36.3918	4.77	12.5	268	4.3	0.8	101	13	16	15	216	141	169	41	13	0.49	97	1	0	0	0	0	1	1	1	0	1	159.9	70.2	99	99	27.4	1	106	74	17.14	24.416	0	77.7	0	0	0		5.7	4.1	0.08
999	2	30.8027	6.2	13	312	4.3	0.6	48	17	11	12	178	96	68	68	9	0.61	86	0	0	0	0	0	0	0	0	0	0	154.2	59.3	77	101	24.9	0	114	78	14.48	24.4182	0	55.9	0	0	1		5.3	5	0.09
1000	2	46.4438	4.95	14	216	4.2	0.9	61	15	8	11	163	84	120	55	9	0.65	84	0	0	1	0	0	0	0	0	0	0	153.3	55.2	81.5	92	23.6	0	139	98	13.48	24.4203	0	100.3	1	0	1		5.2	4	0.03
1001	1	54.2986	8.69	15.6	237	4.5	1.4	41	28	24	18	131	73	66	45	27	1.07	86	0	0	0	0	0	0	1	1	1	0	165.1	74.4	94	98	27.3	1	89	73	19.75	26.5457	1	129.6	1	0	0		5.8	9.2	0.03
1002	2	36.8192	6.02	14.2	331	4.2	0.7	54	17	11	12	188	105	251	33	12	0.57	87	0	0	0	0	0	1	1	1	0	1	157.4	60.4	80	92	24.5	0	118	88	14.75	24.4205	0	107.5	1	0	1		5.1	5	0.04
1003	2	57.8548	5.01	15.3	247	4	0.8	59	17	16	7	172	93	159	47	16	0.84	94	0	0	0	0	0	1	1	1	0	1	147.8	57	78	94	26.1	1	118	82	13.92	24.4211	0	76.1	0	0	0		5.4	6.5	0.02
1004	2	72.2795	6.06	13.1	246	4.2	0.8	59	21	14	7	208	125	68	69	10	0.63	92	0	0	0	0	0	0	0	0	0	0	146.5	48.4	81	90.5	22.4	0	132	79	11.82	24.4215	0	67	0	0	0		5.6	2.7	0.02
1005	2	71.874	7.88	14.1	324	4.5	1	72	39	37	14	248	146	238	54	13	0.63	87	0	0	0	0	0	0	1	1	0	1	150	58.1	82	97	25.8	1	118	61	14.19	24.4234	0	91.2	0	0	0		6	4.7	0.11
1006	1	52.611	6.92	17.7	262	4.6	1.3	123	96	162	55	219		507	31	13	0.83	101	0	0	1	0	0	1	1	1	1	1	171	80.8	94.5	99	27.6	1	129	93	21.46	26.5594	1	359.9	1	0	0		5.6	7.7	0.85
1007	2	47.9178	6.12	14.3	227	3.9	3	52	26	24	10	196	117	100	59	6	0.53	91	1	0	0	0	0	0	0	0	0	0	151.8	63.5	90	97.5	27.7	1	110	72	15.51	24.4252	0	106.7	1	0	0		5.6	4.5	0.03
1008	2	67.5973	4.66	12.4	265	4.2	0.5	59	38	26	15	130	70	73	45	18	0.8	74	0	0	0	0	0	1	1	1	1	0	150.6	48.8	77	92	21.5	0	127	81	11.92	24.4262	0	81.9	0	0	0		5.4	2.3	0.06
1009	1	31.1096	5.99	16.6	281	4.3	1.8	72	21	33	63	205	142	115	40	10	0.91	93	0	0	0	0	0	0	0	0	0	0	166.8	84.9	98	108	30.5	1	119	73	22.56	26.5724	1	146.8	1	1	1		5.3	7.2	0.16
1010	2	50.0384	7.02	15	371	4.2	0.5	86	22	29	22	198	112	192	48	13	0.62	104	0	0	1	0	0	1	1	1	0	1	155.8	70	84	101	28.8	1	144	100	17.1	24.4286	0	129.9	1	0	0		6.6	3.8	0.17
1011	1	42.7123	13.04	18.8	345	5.1	1.5	94	30	45	60	198	138	60	48	21	0.91	70	0	1	1	0	0	0	0	0	0	0	166.5	83.8	101	102	30.2	1	158	106	22.28	26.5871	1	177.3	1	0	1		5.2	9	0.44
1012	2	64.3123	5.9	13.5	176	4	0.9	67	30	22	11	218	155	101	43	9	0.7	76	0	0	0	0	0	1	0	1	0	0	156.1	60.5	81	96	24.8	0	113	73	14.78	24.4298	0	106.2	1	0	0		5.4	4.8	0.2
1013	2	74.0849	3.32	13.3	155	4.3	1	77	29	22	16	162	79	151	53	21	0.54	94	1	0	0	0	0	0	1	1	1	1	150.3	56.8	88	94	25.1	1	131	73	13.88	24.4366	0	98.4	0	0	0		5.7	2.8	0.07
1014	2	28.2384	10	14.8	288	4.4	0.8	66	27	34	23	157	74	142	55	10	0.82	73	1	0	1	0	0	0	0	0	0	0	168.9	87	89	116	30.5	1	144	94	21.26	24.4368	0	108.6	1	0	1		5.5	4.9	0.17
1015	1	41.7342	8.08	15.7	265	4.4	1.8	87	69	117	78	211	131	140	52	8	0.83	82	1	0	1	0	0	0	0	0	0	0	162.1	92.3	106	110	35.1	1	138	91	24.54	26.5872	1	148.1	1	0	0		5.9	5.3	0.51
1016	2	59.7397	4.57	13.8	313	4.6	1	51	18	12	22	300	225	154	44	11	0.8	101	1	0	0	0	0	1	1	1	1	1	152	59.7	89	96	25.8	1	119	86	14.59	24.4389	0	106.4	1	0	0		5.5	5.7	0.05
1017	2	75.7616	5.06	11	259	4.1	0.6	102	34	21	18	223	158	98	45	9	0.7	84	0	1	1	0	0	1	0	1	0	0	150.4	50.2	83	91	22.3	0	110	76	12.27	24.4422	0	73.8	0	0	1		5.8	5.2	1.18
1018	2	68.1836	6.4	14.5	207	4.4	0.8	96	29	23	11	246	138	96	89	16	0.82	91	1	0	0	0	0	0	1	1	1	0	162.6	60.1	89	97	22.7	0	137	79	14.69	24.4426	0	127.5	1	0	0		5.7	4.8	0.04
1019	2	56.3233	4.54	14.4	278	4.3	1.8	85	19	21	15	281	215	73	51	12	0.63	81	0	0	1	0	0	0	0	0	0	0	151.8	54.9	77	95	23.8	0	138	91	13.42	24.4444	0	74.3	0	0	0		5.3	5	0.03
1020	1	43.9836	5.67	17.3	237	4.3	1.1	76	73	148	84	195	94	232	55	14	0.85	132	1	0	1	0	1	0	1	1	0	1	183.9	121.7	122	114	35.9	1	135	99	32.39	26.6146	1	239.5	1	1	1		6.4	6	0.05
1021	1	74.2192	7.18	15.8	258	4.5	1.1	81	28	35	41	199	142	83	40	19	0.91	100	0	1	1	0	0	0	0	0	0	0	156.6	60.9	91	96	24.8	0	141	75	16.21	26.6174	1	106.3	1	0	0		6.4	5.5	0.35
1022	2	77.1808	7.09	9.7	264	4.2	0.7	56	30	22	14	143	48	110	73	32	0.74	83	0	1	1	0	0	0	1	1	1	0	146.7	45	83	87	20.9	0	114	50	11	24.4444	0	83.1	0	0	0		5.7	5.5	0.05
1023	2	74.1616	6.79	13.2	213	4.2	1	47	16	12	8	138	74	76	49	12	0.65	85	0	0	0	0	0	1	1	1	1	0	162.2	62.1	86	99	23.6	0	124	70	15.18	24.4444	0	98.8	0	0	0		5.6	4	0.03
1024	2	66.6	7.1	14.4	323	4.1	0.7	79	35	29	32	150	95	61	43	5	0.72	76	0	1	1	0	0	1	1	1	1	0	151.5	50.6	78.5	87	22	0	134	85	12.37	24.4466	0	88.4	0	0	1		6.6	3.3	1.02
1025	2	57.7123	3.88	15.2	173	4.9	1.4	92	28	29	21	269	193	68	62	13	0.69	103	0	0	1	0	0	0	1	1	1	0	156.2	50.8	72	89	20.8	0	141	97	12.42	24.4488	0	106	1	0	0		5.8	4.9	0.07
1026	2	55.4521	6.73	13.3	298	4.5	0.5	71	19	19	40	231	146	172	51	16	0.48	103	1	0	1	0	0	0	1	1	0	1	158.6	61.7	90	96	24.5	0	121	91	15.09	24.4571	0	88.8	0	0	0		5	1.2	0.06
1027	2	27.2137	4.94	14.1	264	4.3	0.8	73	20	12	11	166	88	45	69	7	0.59	94	0	0	0	0	0	0	0	0	0	0	151.6	53.6	72	96	23.3	0	105	81	13.11	24.459	0	59.5	0	0	0		5.1	5	0.06
1028	2	62.1589	6.05	14.9	228	4.5	1	105	29	23	19	175	95	64	67	15	0.78	98	0	0	1	0	0	0	0	0	0	0	151.5	58.5	77	94	25.3	1	141	92	14.31	24.4615	0	107.5	1	0	0		5.7	5.5	0.14
1029	2	70.2849	4.8	14.2	165	4.6	0.8	72	20	16	19	182	93	52	79	17	0.63	123	0	1	1	1	1	0	1	1	1	0	147	42.8	72	86	19.8	0	140	69	10.47	24.4626	0	76	0	0	0		6.7	3.6	0.08
1030	2	48.2959	5.57	11.8	302	4.2	0.9	55	16	11	13	217	146	61	59	10	0.7	86	0	0	0	0	0	0	0	0	0	0	148.5	50.4	73.5	90	22.7	0	95	74	12.33	24.4643	0	71.4	0	0	0		5.9	4	0.04
1031	2	52.1151	4.66	13.1	235	4.3	0.8	76	29	27	14	153	97	95	37	16	0.66	97	0	1	1	0	0	1	1	1	1	0	147.8	47.7	75	85	21.8	0	120	83	11.67	24.4654	0	79.2	0	0	0		6.1	4.3	0.06
1032	2	56.9151	5.89	13.5	264	4.4	1.3	69	35	32	72	275	191	62	72	15	0.66	98	0	0	0	0	0	0	0	0	0	0	154.9	58	83	102	24.2	0	113	84	14.19	24.4655	0	83.1	0	0	0		5.5	4.6	0.1
1033	2	52.8356	4.61	10	347	4	0.5	51	34	43	9	197	107	135	63	7	0.52	88	0	0	0	0	0	0	0	0	0	0	150.5	56.4	84	93	24.9	0	109	84	13.8	24.4681	0	75.9	0	0	0		5.5	4.1	0.02
1034	2	36.9918	5.75	11.4	249	4.5	0.7	73	20	12	44	219	124	201	55	10	0.64	92	0	0	1	0	0	0	1	1	0	1	158.3	69.6	85	99	27.9	1	157	111	17.03	24.4684	0	96.6	0	0	0		5.7	4.5	0.38
1035	2	77.2411	6.35	9.6	317	4.2	0.5	49	18	14	22	155	73	165	49	17	0.78	114	0	1	1	1	1	1	1	1	0	1	150.5	48.3	79	91	21.3	0	121	65	11.82	24.472	0	83.2	0	0	0		6.9	5.6	0.07
1036	2	59.2959	5.1	12.6	236	4.4	0.6	93	18	6	11	199	115	93	65	15	0.68	99	0	0	0	0	0	0	0	0	0	0	151.1	55	84	93	24.1	0	98	72	13.46	24.4727	0	68.8	0	0	1		5.4	4.1	0.03
1037	1	35.8356	5.62	16.4	338	4.7	1.2	68	22	33	32	225	160	134	38	14	0.89	110	0	0	1	0	0	1	0	1	0	0	171.4	92	99.5	103	31.5	1	165	115	24.53	26.663	1	198.8	1	0	1		5.7	6.1	0.11
1038	2	56.4575	4.72	11.4	280	4.3	0.7	74	27	20	12	141	79	91	44	11	0.56	94	1	0	0	0	0	1	0	1	0	0	158.3	56.1	89	95	22.4	0	97	69	13.73	24.4742	0	93.2	0	0	0		5.4	3	0.09
1039	2	61.5041	4.82	13.9	255	4	0.9	41	27	22	33	215	127	67	75	11	0.73	127	0	0	0	0	1	0	0	0	0	0	151.1	53.4	86	92	23.4	0	134	85	13.07	24.4757	0	96.1	0	0	1		6.2	3.6	0.08
1040	2	60.1918	5.36	13.6	277	4.2	0.6	60	21	19	28	224	147	188	39	15	0.63	92	1	0	0	0	0	1	1	1	0	1	155.7	61.2	92	91	25.1	1	117	71	14.98	24.4771	0	110.3	1	0	0		5.7	3.9	0.07
1041	1	49.9288	6.67	15.1	292	4.3	0.9	64	35	66	60	190	84	287	49	11	0.87	91	1	0	1	0	0	0	1	1	0	1	170.6	96.5	106	112	33.4	1	124	95	25.73	26.6632	1	213.8	1	0	0		5.7	5.1	0.22
1042	2	54.4466	4.68	13	447	4.3	0.6	78	27	18	12	213	128	68	71	10	0.78	91	1	0	0	0	0	0	0	0	0	0	157.7	61.4	91	92	24.6	0	114	76	15.03	24.4788	0	101.7	1	0	1		5.5	4.4	0.02
1043	2	44.9151	7.1	14.5	241	4.2	1	44	29	27	39	203	100	101	83	13	0.83	86	1	0	0	0	0	0	0	0	0	0	163.8	84.6	97	115	31.5	1	110	71	20.71	24.4799	0	99.4	0	0	1		5.4	5	0.11
1044	2	57.6082	5.27	14.6	244	4.7	0.9	80	26	14	11	257	146	91	93	17	0.76	87	0	0	0	0	0	0	0	0	0	0	151	46.2	80	93	20.3	0	107	79	11.31	24.4805	0	88.3	0	0	0		5.3	4.2	0.04
1045	2	74.0767	5.68	13	304	4.4	0.7	69	21	15	11	174	96	106	57	16	0.74	94	0	1	1	0	0	0	1	1	1	0	153.8	60.7	82	99	25.7	1	119	77	14.86	24.4811	0	85.2	0	0	0		5.5	3.7	0.27
1046	1	36.5479	9.32	16	284	4.5	0.9	53	46	75	89	174	102	181	36	19	0.87	88	0	0	1	0	0	1	1	1	0	1	167.1	83.1	98	101	29.8	1	137	97	22.1576	26.6637	1	168.476	1	1	0		5.5	8.3	0.35
1047	2	63.8575	8.35	12.3	222	3.8	0.5	45	23	22	19	137	68	89	51	11	0.68	102	1	1	1	0	0	0	0	0	0	0	160.6	68.7	89	99.5	26.6	1	112	74	16.82	24.4833	0	106.6	1	0	0		6.1	4.5	6.81
1048	2	29.0411	4.02	12.8	263	4.3	1.2	39	17	11	6	164	99	71	51	7	0.53	89	0	0	0	0	0	0	0	0	0	0	157.2	66.9	83	106	27.1	1	108	72	16.38	24.4843	0	106.8	1	0	0		5.2	3.8	0.02
1049	2	28.074	4.67	13.2	229	4.2	0.8	52	18	8	8	210	123	71	73	12	0.56	69	0	0	0	0	0	0	0	0	0	0	156.5	60.6	86	98	24.7	0	104	84	14.84	24.4884	0	63.9	0	0	0		5.3	4.7	0.06
1050	2	74.3151	3.71	12.1	150	3.9	0.8	59	23	14	7	167	108	86	42	15	0.64	95	1	0	0	0	0	1	0	1	0	0	150.3	56.8	90	98	25.1	1	125	51	13.91	24.4894	0	88.1	0	0	0		5.3	3.9	0.13
1051	2	33.5233	5.36	14.2	346	4.5	0.9	90	22	22	26	150	82	114	45	11	0.65	92	1	0	0	0	0	1	1	1	1	0	161.7	71.5	92	107	27.2	1	109	73	17.51	24.4895	0	112.6	1	0	0		5.4	5	0.45
1052	1	62.1973	6.39	15.1	246	4.1	1	90	24	36	118	190	94	228	50	13	0.8	100	0	1	1	0	0	0	1	1	0	1	159.9	68.2	93	101	26.7	1	118	76	18.19	26.6716	1	94.1	0	0	0		5.6	6.5	0.08
1053	1	47.7014	5.61	15.8	240	4.3	1	131	39	52	55	208	136	140	44	13	0.74	98	0	0	0	0	0	0	0	0	0	0	159.1	72.5	91	98	28.7	1	114	80	19.34	26.6759	1	117.9	1	0	1		5.6	5.7	0.07
1054	2	52.5315	7.98	15.4	320	4.2	0.9	70	17	9	22	259	168	116	68	7	0.7	98	0	0	1	0	0	0	0	0	0	0	161.1	52.1	78	90	20.1	0	124	90	12.76	24.4914	0	94.6	0	0	0		5.5	3.2	0.02
1055	2	76.2329	7.71	12.1	532	4.4	0.6	76	41	35	23	186	117	92	51	17	0.66	111	0	1	1	0	0	0	0	0	0	0	153.8	60.1	81	98	25.4	1	124	61	14.72	24.4925	0	88.9	0	0	0		5.6	6	0.08
1056	2	33.7863	5.95	10	472	4.4	0.3	44	13	8	11	229	137	113	69	15	0.73	88	0	0	0	0	0	0	0	0	0	0	155.8	53.8	77	93	22.1	0	92	64	13.18	24.4981	0	75.8	0	0	1		5.5	4.8	0.06
1057	2	56.6521	4.53	12.3	315	4.1	1.2	45	19	12	10	209	143	75	51	12	0.59	98	1	1	1	0	0	0	0	0	0	0	150.3	72	91	105	31.9	1	116	75	17.64	24.5	0	124.2	1	0	1		5.4	4.9	0.07
1058	1	53.2247	6.91	17.2	327	4.8	1.6	79	46	65	32	194	96	263	45	12	0.94	111	1	1	1	0	0	0	1	1	1	1	174.4	87.7	105	99.5	29	1	133	97	23.4	26.6819	1	241.3	1	0	1		6.7	7.7	0.11
1059	2	58.0329	4.94	15	242	4.4	2	116	26	21	19	248	170	65	65	17	0.7	72	0	0	1	0	0	0	0	0	0	0	156.5	62	87	96	25.3	1	139	97	15.19	24.5	0	139.1	1	0	0		5.6	5.3	0.12
1060	2	71.7534	5.43	13.5	228	4.2	0.8	46	19	19	14	228	159	78	53	16	0.72	88	1	0	0	0	0	0	0	0	0	0	157.2	62.2	90	93	25.2	1	135	79	15.24	24.5016	0	113.2	1	0	0		5.9	5.9	0.34
1061	2	32.3918	5.15	15.3	247	4.5	0.9	51	20	11	15	173	72	110	79	8	0.49	97	0	0	0	0	0	0	0	0	0	0	157.1	50.2	82	91	20.3	0	115	77	12.3	24.502	0	58.3	0	0	1		4.8	3.1	0.04
1062	2	74.2082	4.9	14.6	211	4.4	0.9	94	34	22	29	279	201	135	51	21	1.05	102	1	1	1	0	0	0	1	1	1	0	161.3	70.4	101	102	27.1	1	145	71	17.25	24.5028	0	130.3	1	0	0		5.7	6.3	0.41
1063	1	25.1836	7.39	15.9	297	4.7	1	72	116	203	65	273	213	110	38	13	0.89	81	0	0	0	0	0	1	0	1	0	0	169.7	91.4	98.5	108	31.6	1	118	73	24.42	26.7177	1	102.7	1	0	1		5.3	9	0.14
1064	2	63.1452	3.83	14.7	286	4.3	1	88	26	21	18	223	148	91	57	15	0.64	89	0	1	1	0	0	0	0	0	0	0	153.9	62.6	86	93	26.4	1	141	84	15.34	24.5048	0	121.2	1	0	0		5.2	4.3	0.02
1065	1	67.1233	5.42	13	218	4.2	0.7	51	20	17	16	247	171	91	58	19	0.69	89	0	0	0	0	0	0	1	1	1	0	148.7	48.2	81	90	21.8	0	123	77	12.88	26.722	1	73	0	0	0		5.2	3.2	0.02
1066	2	69.9397	5.16	14.6	278	4.4	0.8	117	26	23	25	243	171	110	50	21	0.76	104	1	1	1	1	1	0	1	1	1	0	150.1	52.6	95	98	23.3	0	123	73	12.89	24.5057	0	96.7	0	0	1		5.9	5.1	0.07
1067	2	57.2137	5.64	13.9	325	4.3	1	96	23	20	14	268	188	159	48	12	0.72	85	0	0	0	0	0	1	1	1	0	1	158.6	66.8	87	96	26.6	1	122	87	16.37	24.506	0	230.4	1	0	0		5.8	6.1	0.71
1068	2	70.9178	4.19	13.3	263	4.4	0.8	74	32	23	8	157	71	65	73	20	0.63	99	0	1	1	0	0	0	1	1	1	0	152	51.7	78.5	89	22.4	0	160	80	12.67	24.5068	0	74.7	0	0	0		5.8	4	0.03
1069	2	58.8795	6.61	12.9	298	4.4	0.9	104	20	16	19	230	148	136	55	10	0.56	107	1	0	0	0	0	0	0	0	0	0	160.8	69.2	88	98	26.8	1	135	77	16.96	24.5087	0	124	1	0	0		5.6	5.1	0.08
1070	2	57.7479	5.51	13.5	345	4.2	0.9	95	30	32	18	278	204	128	48	10	0.57	153	0	0	0	0	1	1	0	1	0	0	155.1	62.1	85	96	25.8	1	101	68	15.22	24.5089	0	113.9	1	0	0		7.6	3.7	0.07
1071	2	61.2055	5.86	13.2	152	4.3	1	85	29	28	22	153	90	48	53	12	0.6	98	1	1	1	0	0	0	0	0	0	0	155.1	67.2	95	91	28	1	124	73	16.47	24.5089	0	128.2	1	0	0		6.5	4.7	0.05
1072	2	72.1616	4.82	14.7	235	3.9	0.6	72	23	18	7	215	151	75	49	10	0.72	102	1	1	1	0	0	1	0	1	0	0	165.3	74.7	98	102	27.3	1	114	72	18.31	24.5114	0	140.7	1	0	0		5.3	5.1	0.53
1073	2	52.5342	5.58	13.2	247	4.6	0.8	73	34	48	42	173	77	211	54	13	0.8	119	1	1	1	0	0	0	1	1	1	1	154.2	81.5	100	109	34.3	1	119	77	19.98	24.5153	0	140.9	1	0	1		7	4.2	0.22
1074	2	61.9589	5.32	14.2	295	4.5	1.2	75	24	21	18	227	157	147	41	15	0.72	104	1	0	0	0	0	1	0	1	0	0	158.1	65.1	93	100	26	1	110	72	15.96	24.5161	0	120.4	1	0	0		5.7	4.3	0.06
1075	2	61.5041	4.28	13.5	217	4.2	1.4	78	31	26	15	160	99	42	53	9	0.64	83	0	1	1	0	0	0	1	1	1	0	153.7	50.7	83	93	21.5	0	92	67	12.43	24.5168	0	58.5	0	0	0		5.4	4.4	0.02
1076	2	27.1014	6.31	12.8	268	4	0.5	75	20	13	9	144	82	54	51	9	0.6	92	0	0	0	0	0	0	0	0	0	0	157.9	59.3	77	97	23.8	0	84	54	14.54	24.5194	0	69.1	0	0	0		5.3	4.7	0.45
1077	2	55.8301	6.44	14	239	4.1	0.9	84	29	26	15	181	108	91	55	7	0.6	78	0	0	0	0	0	0	0	0	0	0	155.2	55.3	85	95	23	0	113	74	13.56	24.5208	0	80.9	0	0	0		5.2	5	0.04
1078	2	71.7068	3.92	13.2	230	4.1	1.4	52	29	21	19	209	137	83	55	16	0.64	91	0	0	0	0	0	0	0	0	0	0	152.9	57.9	77	94.5	24.8	0	122	82	14.2	24.525	0	111	1	0	0		5.6	4.7	0.07
1079	2	61.0575	5.48	14.9	218	4.1	1.2	67	17	13	9	210	129	71	67	17	0.65	79	0	0	0	0	0	0	0	0	0	0	153.4	49.5	84	94	21	0	102	67	12.14	24.5253	0	67.9	0	0	0		5.7	3.5	0.08
1080	2	63.411	4.96	14.5	243	4.4	1.8	54	17	17	17	189	113	137	49	16	0.67	106	0	1	1	0	0	1	0	1	0	0	150.2	58.3	80	90	25.8	1	127	81	14.3	24.5283	0	125.2	1	0	1		5.2	5.5	0.03
1081	2	75.3534	5.54	14.4	291	3.9	0.9	88	33	22	11	219	134	66	72	16	0.79	90	1	0	0	0	0	0	0	0	0	0	162.2	73.3	105	101	27.9	1	118	78	17.98	24.5293	0	117.9	1	0	0		5.9	6.6	0.28
1082	2	54.2877	6.18	15.2	310	4.3	0.7	113	21	19	8	175	102	70	59	11	0.58	100	0	0	0	0	0	0	0	0	0	0	146.5	50.1	74	90	23.2	0	129	76	12.29	24.5309	0	72.3	0	0	0		5.2	2.7	0.06
1083	2	62.5808	4.23	13.8	238	4.7	1.9	75	36	38	20	256	191	48	55	15	0.67	86	0	1	1	0	0	0	1	1	1	0	150.8	52.5	84	86	23	0	118	86	12.88	24.5333	0	76.5	0	0	0		6	5.8	0.02
1084	2	60.011	3.64	13.6	233	4.7	0.9	109	23	15	12	188	124	56	53	17	0.63	88	0	1	1	0	0	0	0	0	0	0	154.6	58.2	80	95	24.2	0	124	77	14.28	24.5361	0	66	0	0	1		5.2	4	0.02
1085	1	81.9945	8.67	16.1	253	4.4	1.9	137	20	17	37	240	163	114	54	10	0.88	99	0	1	1	0	0	0	0	0	0	0	162.9	64.1	79	91	24.2	0	176	71	17.13	26.7239	1	121.8	1	0	1		5	5.2	1.18
1086	1	40.8329	5.86	15	233	4.3	1.1	90	45	94	111	243	164	188	41	11	0.79	107	1	0	1	0	0	0	1	1	0	1	179.6	121.9	111	115	37.6	1	126	93	32.58	26.7268	1	214.9	1	1	1		5.7	7.5	0.16
1087	2	63.3589	2.56	13.1	252	4.4	1	104	33	34	16	183	107	44	67	14	0.63	93	0	0	0	0	0	0	1	1	1	0	156.2	62.6	87	100	25.7	1	122	69	15.36	24.5367	0	131.2	1	0	1		5.8	3.9	0.02
1088	2	58.9699	4.86	15.2	281	4.3	1	84	20	23	33	264	182	102	62	8	0.72	96	0	0	0	0	0	0	0	0	0	0	156.02	48.9	79	96	20	0	117	80	12	24.5399	0	111.5	1	0	0		5.7	4	0.1
1089	2	32.3534	4.71	13.8	326	4.5	0.8	59	27	32	38	230	145	149	55	13	0.68	84	1	0	0	0	0	0	0	0	0	0	158.7	68.4	88	104	27.2	1	93	61	16.79	24.5468	0	108.9	1	0	0		5.3	5.8	0.05
1090	2	63.5808	5.88	13.2	278	4.4	0.8	95	28	24	22	182	103	246	30	8	0.62	93	0	0	1	0	0	1	1	1	0	1	156.8	57.4	80	87.5	23.3	0	143	92	14.09	24.547	0	117.2	1	0	0		6	4.8	0.18
1091	2	61.7671	6.5	15.3	322	4.1	0.9	61	26	16	11	198	115	89	65	12	0.7	74	0	1	1	0	0	0	0	0	0	0	159.1	62.6	84	93	24.8	0	115	88	15.37	24.5527	0	105.7	1	0	0		5.4	5.2	0.27
1092	2	35.7534	5.51	14.1	209	4.3	1.1	88	18	13	10	143	87	62	44	7	0.64	84	1	0	0	0	0	1	0	1	0	0	162	67.4	94	105	25.7	1	108	70	16.55	24.5549	0	98.7	0	0	1		5.2	4.9	0.24
1093	2	53.4411	4.92	14.8	346	4.8	0.6	66	23	26	21	343	259	104	63	10	0.6	110	0	0	0	0	0	0	1	1	1	0	151.3	55.7	78	90.5	24.3	0	112	80	13.68	24.5601	0	85.6	0	0	1		6.3	3.8	0.41
1094	2	34.7863	6.64	13.3	241	4.8	1.6	33	18	8	11	220	140	86	63	10	0.65	86	0	0	0	0	0	0	0	0	0	0	154	48	74	87	20.2	0	108	71	11.79	24.5625	0	59.6	0	0	1		5	3.5	0.03
1095	2	70.8329	2.71	13.5	198	4.4	0.7	115	22	16	16	191	121	135	43	13	0.73	110	0	0	0	0	0	1	1	1	1	0	158.4	58.5	83	91	23.3	0	120	64	14.37	24.5641	0	111.8	1	0	0		5.7	5.4	0.21
1096	2	63.811	5.91	14.6	276	4.5	1.6	149	52	60	42	232	151	75	66	14	0.68	95	1	0	0	0	0	0	1	1	1	0	160.9	76.9	99	106	29.7	1	114	78	18.89	24.5644	0	152.5	1	0	1		6	5.3	0.12
1097	2	40.8438	5.15	14.1	305	4.1	0.9	55	21	26	21	145	84	65	48	11	0.66	94	1	0	0	0	0	1	0	1	0	0	156.8	66.5	90	107	27	1	99	69	16.34	24.5714	0	95.2	0	0	1	7.5	5.3	3.9	0.1
1098	2	60.9151	4.08	12.9	241	4.4	0.7	79	38	22	19	177	115	67	49	15	0.77	95	0	0	0	0	0	1	0	1	0	0	150.6	54.9	79	96	24.2	0	134	88	13.49	24.5719	0	102.2	1	0	0		5.3	4.8	0.1
1099	2	69.8356	5.94	14	234	4.2	1.3	55	26	23	18	257	186	72	57	13	0.71	92	0	0	0	0	0	0	0	0	0	0	148.2	49.2	70	90	22.5	0	138	81	12.09	24.5732	0	85.9	0	0	0		5.3	4.9	0.11
1100	2	51.7562	4.25	14.2	321	4.3	0.8	65	34	29	35	207	141	75	51	17	0.58	94	0	0	0	0	0	0	0	0	0	0	158.3	59.4	86	96	23.8	0	113	76	14.5966	24.5734	0	92.9006	0	0	1		5.6	4.9	0.14
1101	2	51.5918	6.6	12.7	367	4.4			20	15	13	197	101	79	80		0.73	96	0	0	0	0	0	0	0	0	0	0	151.8	57.5	79	91	25	1	118	86	14.13	24.5739	0	84.3	0	0	0		5.9		0.66
1102	2	71.2055	4.83	13.4	278	4.4	1	84	27	14	11	223	152	74	56	8	0.66	87	0	0	0	0	0	0	0	0	0	0	152.4	48.3	80	85	20.9	0	133	84	11.87	24.5756	0	81.8	0	0	0		5	4.3	0.04
1103	2	54.5808	6.44	12	326	4.4	0.5	39	28	20	17	123	58	155	34	26	0.97	83	1	1	1	1	1	1	1	1	1	1	150.2	67.7	94	98	30	1	114	82	16.64	24.579	0	73.8	0	1	0		6.8	6.6	0.04
1104	2	61.9945	4.89	16.3	285	4.3	1.2	94	59	49	49	293	197	191	58	15	0.82	102	1	0	0	0	0	0	1	1	1	1	158.7	61.8	90	93	24.4	0	115	80	15.19	24.5793	0	133.3	1	0	1		5.6	6.9	0.26
1105	2	60.0274	5.42	14.5	262	4.3	1	90	31	25	7	187	118	74	54	13	0.55	78	0	0	0	0	0	0	0	0	0	0	155.8	54.8	80	88	22.5	0	103	73	13.47	24.5803	0	76.3	0	0	0		5.5	3.6	0.08
1106	2	25.3397	4.79	13.3	171	4.4	0.7	51	17	12	13	176	109	66	54	7	0.66	78	0	0	0	0	0	0	0	0	0	0	159.4	59.6	84	100	23.5	0	109	79	14.65	24.5805	0	61.3	0	0	0		5.7	4.3	0.59
1107	2	29.9753	6.33	13.6	191	4.7	1.4	57	23	19	10	192	114	84	61	10	0.74	83	0	0	0	0	0	0	0	0	0	0	165.3	66.8	85	110	24.4	0	107	80	16.42	24.5808	0	96.5	0	0	1		5.1	5.5	0.08
1108	2	63.8466	7.25	14.9	187	4.2	0.8	84	24	28	21	213	140	110	51	12	0.72	96	0	0	0	0	0	0	0	0	0	0	155.5	56.1	82	92	23.2	0	119	78	13.79	24.5811	0	98.1	0	1	0		5.8	4.2	0.03
1109	2	28.5096	4.14	13.1	375	4.5	1.6	57	20	12	20	248	144	107	83	10	0.62	86	0	0	0	0	0	0	0	0	0	0	159.6	50.2	74	95	19.7	0	100	66	12.34	24.5817	0	59.5	0	0	1		5.7	2.2	0.05
1110	2	60.5123	7.46	15.1	274	4.6	1.2	87	19	19	23	226	107	394	40	15	0.82	105	0	0	0	1	1	1	1	1	0	1	158.1	62.4	86	92	25	1	138	87	15.34	24.5833	0	146.4	1	0	0		5.7	7.2	0.28
1111	1	39.0411	5.01	15.2	276	4.9	2.2	62	29	40	51	168	104	142	36	9	0.92	98	0	1	1	0	0	1	0	1	0	0	174.8	93.4	100	109	30.6	1	134	92	24.97	26.7345	1	149.2	1	1	1		5.7	7.5	1.12
1112	2	65.1205	5.1	13.4	151	4.5	1	81	24	25	11	95	47	53	37	15	0.72	141	0	1	1	1	1	1	1	1	1	0	149.4	50.6	81	88	22.7	0	117	91	12.44	24.585	0	78.4	0	0	0		6.9	4.5	0.08
1113	2	51.0603	4.29	8.4	345	4.2	0.7	72	41	36	52	206	135	74	56	8	0.53	101	0	0	0	0	0	0	0	0	0	0	152.5	50.6	78	91	21.8	0	91	62	12.44	24.585	0	96.7	0	0	0	7.2	5.8	3.2	0.03
1114	2	43.0192	6.11	14.1	326	4.4	0.8	66	20	17	11	222	147	79	59	8	0.58	78	0	0	1	0	0	0	0	0	0	0	159.7	63.9	87	100	25	1	135	90	15.71	24.5853	0	113.1	1	0	0		5.7	5.2	0.34
1115	2	60.7041	6.12	13.3	278	4.5	0.7	71	28	29	12	141	69	171	38	12	0.65	112	1	1	1	1	1	1	1	1	1	1	154.1	77.2	97	107.5	32.5	1	134	87	18.98	24.5855	0	161.5	1	0	0		7	6.3	0.04
1116	2	36.4301	7.62	13.6	346	4.2	0.8	49	16	14	14	185	117	44	59	15	0.67	81	0	0	0	0	0	0	0	0	0	0	163.7	66.7	81	98	24.9	0	97	72	16.4	24.5877	0	77.9	0	0	1		5.2	4.4	0.02
1117	2	36.3288	4.56	13.5	252	4.5	0.9	48	31	25	61	206	112	99	74	10	0.63	92	0	0	1	0	0	0	0	0	0	0	156.7	58.6	84	93	23.9	0	126	92	14.41	24.5904	0	98.4	0	0	1		5	5.2	0.11
1118	2	56.3781	5.39	13.4	276	4.3	2.3	49	29	30	17	260	183	91	59	9	0.54	92	0	0	0	0	0	0	0	0	0	0	155.7	56.4	74	92	23.3	0	99	71	13.87	24.5922	0	112.5	1	0	0		5.3	3.6	0.05
1119	2	71.7123	6.21	12	278	3.9	0.5	104	20	10	12	151	93	61	46	17	0.59	98	0	1	1	0	0	1	0	1	0	0	152.8	56.8	86	90	24.3	0	117	74	13.97	24.5951	0	71.9	0	0	0		6.3	4.7	0.95
1120	1	41.9425	7.67	17.2	249	4.1	1.3	98	27	34	24	263	171	186	55	15	1.17	106	1	1	1	1	1	0	1	1	1	1	172	92.6	102	103	31.3	1	146	107	24.76	26.7387	1	164.9	1	0	1		8.4	8.3	0.72
1121	2	48.0685	5.23	13.9	229	4.4	0.6	93	23	18	12	204	122	120	58	8	0.62	88	0	0	0	0	0	0	0	0	0	0	149.4	54.8	82.5	92.5	24.6	0	116	87	13.48	24.5985	0	106	1	0	0		5.6	4.6	0.02
1122	2	59.126	2.93	11	231	4.3	0.5	41	37	28	10	165	85	45	71	13	0.67	110	1	0	0	1	1	0	1	1	1	0	147.1	60.2	94	96.5	27.8	1	128	69	14.81	24.6013	0	79.4	0	0	0		7	1.8	0.02
1123	1	57.0082	7.97	15.2	231	4.2	2	103	65	28	562	184	103	180	45	12	0.9	134	1	1	1	0	1	0	1	1	0	1	173.2	87.3	106	102	29.2	1	160	93	23.35	26.7468	1	187.5	1	1	1		6.5	5.6	0.86
1124	2	48.7781	11.54	13.7	273	4.3	0.5	95	25	29	29	198	79	107	98	6	0.65	85	0	0	1	0	0	0	1	1	1	0	153.6	50.2	72	95	21.2	0	120	96	12.35	24.6016	0	101.6	1	1	1		6.3	4.5	1.55
1125	2	77.7233	3.03	11.5	168	4.1	0.8	47	26	24	14	174	96	116	55	11	0.72	98	1	1	1	0	0	0	0	0	0	0	153.8	61.7	92	100	26.1	1	137	73	15.18	24.6029	0	116.4	1	0	0	4.3	6.2	4.4	0.13
1126	2	72.3863	5.5	14.3	346	4.2	1	78	25	26	12	203	130	88	55	10	0.8	107	1	0	1	0	0	0	1	1	1	0	162.8	69.3	97.5	97	26.1	1	154	98	17.05	24.6032	0	140.9	1	0	0		6	5.5	0.03
1127	2	52.1726	5.09	14.2	181	4.6	1	83	42	46	12	135	51	51	74	9	0.63	151	0	0	0	1	1	0	0	0	0	0	158.3	59.7	81	95	23.8	0	112	88	14.69	24.6064	0	98.5	0	0	1		7.8	3.1	0.03
1128	2	26.8274	6.02	13.8	247	4.3	0.8	45	15	16	14	164	103	94	42	10	0.65	90	1	0	0	0	0	1	0	1	0	0	163.7	80.3	90	109	29.9	1	118	78	19.76	24.6077	0	109	1	1	1		5.7	5.1	0.06
1129	2	61.2877	4.97	14	269	4.5	1.7	82	15	13	8	250	155	63	82	17	0.63	91	0	0	0	0	0	0	0	0	0	0	156.3	56.4	85	95	23.1	0	85	64	13.88	24.6099	0	113.4	1	0	1		4.9	4	0.05
1130	1	42.3534	5.74	14.6	285	4.7	0.7	54	43	39	30	240	173	146	38	15	0.82	99	0	1	1	0	0	1	1	1	1	0	168.1	85.6	101	104	30.3	1	109	79	22.9	26.7523	1	149.2	1	1	1		5.5	7.4	0.28
1131	2	30.0356	4.4	13.9	185	4.3	0.7	54	19	13	9	181	112	51	59	7	0.59	91	0	0	0	0	0	0	0	0	0	0	161	57.9	76.5	97	22.3	0	113	81	14.25	24.6114	0	88.2	0	0	1		5.5	4.4	0.02
1132	2	48.3534	7.14	14.2	367	4.4	0.8	99	27	34	35	252	165	196	48	14	0.61	96	0	0	0	0	0	1	1	1	0	1	160.1	58.1	81	95	22.7	0	109	79	14.3	24.6127	0	91.1	0	0	0	9.4	5.8	4.7	0.02
1133	2	63.3151	4.59	15.1	192	4.4	1.5	81	23	23	17	205	119	70	72	12	0.58	104	1	1	1	0	0	0	0	0	0	0	154.6	54.4	89	89.5	22.6	0	120	75	13.39	24.614	0	77.8	0	0	0		6.1	4.6	0.11
1134	1	29.4164	5.93	16.9	242	5.2	1	63	19	22	39	212	123	210	47	11	1.05	95	0	0	0	0	0	0	1	1	0	1	167.8	79.4	92	99	28.2	1	118	86	21.26	26.7758	1	113.1	1	0	1		5.3	5.8	0.03
1135	2	38.8849	3.74	15.5	366	4.5	2	49	20	15	9	172	92	56	69	9	0.61	80	0	0	0	0	0	0	0	0	0	0	152.1	50.7	76	91	21.9	0	112	84	12.48	24.6154	0	82.5	0	0	0		5.1	4.7	0.02
1136	2	51.0493	6.99	14.6	373	4.8	1.2	58	30	37	76	221	161	110	38	7	0.58	121	1	0	1	0	0	1	0	1	0	0	160.4	63.7	89	99.5	24.8	0	147	95	15.68	24.6154	0	122.7	1	0	0		6.1	3.9	0.09
1137	2	67.7808	4.93	11.8	202	4.2	0.8	84	37	32	13	128	58	50	60	16	0.68	84	1	0	0	0	0	0	0	0	0	0	160.5	67.3	88	100	26.1	1	109	73	16.57	24.6211	0	164.6	1	0	0		6	3.9	0.05
1138	1	67.3836	6.58	12.3	263	4.5	0.8	54	24	33	20	289	148	520	37	25	1.83	180	0	0	0	1	1	1	1	1	1	1	165.7	69.5	97	93	25.2	1	133	76	18.61	26.777	1	137.5	1	0	0		8.6	6.5	0.05
1139	2	57.1562	6.32	12	253	4.2	0.6	79	43	30	32	145	78	94	48	11	0.61	84	1	1	1	0	0	1	1	1	1	0	158	56.9	92	95	22.8	0	132	80	14.01	24.6221	0	110.8	1	0	0		5.3	3.7	0.76
1140	2	50.8247	6.47	14.6	282	4.4	0.7	74	35	47	33	233	145	228	42	12	0.68	94	1	1	1	0	0	1	1	1	0	1	155.6	72.9	96	102	30.1	1	124	84	17.95	24.6228	0	118.2	1	0	1		5.5	4.9	0.25
1141	1	58.8932	6.24	15.4	255	4.7	1	60	26	29	43	139	56	109	61	12	0.65	115	1	0	0	0	0	0	0	0	0	0	173.2	93.5	102	105	31.2	1	133	88	25.04	26.7807	1	179.4	1	0	1		6.7	7.1	0.07
1142	2	45.8164	4.43	15.1	286	4.2	1.1	59	23	23	26	211	102	56	98	9	0.72	86	0	0	0	0	0	0	0	0	0	0	152.3	49.1	76	96	21.2	0	99	71	12.09	24.6232	0	60.3	0	0	1		5	3.9	0.02
1143	2	61.0795	6.34	14.8	291	4.2	1	106	24	14	12	191	127	59	52	11	0.86	81	0	0	0	0	0	0	0	0	0	0	154.1	58.4	79	96	24.6	0	109	83	14.38	24.6233	0	94.3	0	0	0		5.4	4.1	0.49
1144	2	36.3205	5.28	13.2	243	4.2	0.8	54	20	20	17	184	114	50	60	9	0.63	86	0	0	0	0	0	0	0	0	0	0	155.3	59	80	98	24.5	0	101	63	14.53	24.6271	0	66.5	0	0	1		5.5	5.3	0.07
1145	2	60.537	6.54	13.3	274	4.2	1	79	24	20	22	215	155	81	44	13	0.97	99	0	0	0	0	0	1	0	1	0	0	154.6	62	79	98	25.9	1	120	79	15.27	24.629	0	125	1	0	0		5.5	4.8	0.06
1146	2	55.1041	4.53	12.8	203	4.1	1.6	74	24	26	19	171	100	47	62	13	0.64	90	1	0	0	0	0	0	0	0	0	0	160.2	71.6	94	102	28	1	133	83	17.64	24.6369	0	132.1	1	0	0		5.4	4.9	0.04
1147	2	50.8219	4.89	14.9	297	4.7	1.5	86	17	17	12	227	119	166	75	10	0.6	92	0	0	1	0	0	0	1	1	0	1	152.6	49.6	80	93	21.3	0	135	106	12.22	24.6371	0	106.3	1	0	0		5.6	4	0.05
1148	2	26.4164	5.71	13.2	210	4.5	0.9	48	16	10	13	172	97	80	59	6	0.47	92	0	0	0	0	0	0	0	0	0	0	160	47	74	94	18.4	0	106	76	11.58	24.6383	0	53.3	0	0	0		4.9	3.8	0.08
1149	2	26.6411	8.67	14.5	312	4.5	0.5	94	18	13	20	205	120	173	50	9	0.6	106	0	0	0	0	0	0	1	1	0	1	147.8	47	79	86	21.5	0	102	62	11.58	24.6383	0	56.2	0	0	0		5.5	4.1	0.02
1150	2	30.3616	4.45	12.8	283	4.3	0.5	57	19	12	11	190	109	62	69	8	0.43	87	0	0	0	0	0	0	1	1	1	0	154.1	55.6	67	93	23.4	0	100	74	13.7	24.6403	0	85.2	0	0	0		5.3	2.6	0.08
1151	2	30.4767	9.39	13.5	375	4.2	0.5	76	24	28	18	148	54	205	53	10	0.63	84	0	0	0	0	0	0	1	1	0	1	151.1	39.2	63	78	17.2	0	102	85	9.66	24.6429	0	48.2	0	0	1		5.3	4.3	0.49
1152	2	59.2192	5.14	13.5	195	4.3	0.9	69	29	23	7	198	118	125	55	11	0.65	89	0	0	0	0	0	0	0	0	0	0	154.6	61.8	73	95	25.9	1	113	81	15.23	24.644	0	83.6	0	0	1		5.4	4.7	0.05
1153	2	51.0685	5.46	13.7	260	4.6	1.2	71	16	7	11	222	141	74	66	12	0.9	99	0	0	0	0	0	0	0	0	0	0	162.1	65.2	81	98	24.8	0	130	88	16.07	24.6472	0	91.1	0	0	0		5.6	3.6	0.5
1154	2	51.3452	5.15	14.3	262	4.6	0.9	76	30	20	10	260	164	59	84	14	0.71	89	0	0	0	0	0	0	0	0	0	0	151.7	52.5	80	94	23	0	97	74	12.94	24.6476	0	93.2	0	1	1		5.4	4.7	0.05
1155	2	51.0767	3.89	13.8	184	4.5	1.1	95	43	40	25	212	143	114	46	9	0.64	95	0	0	0	0	0	1	0	1	0	0	150.2	59.6	83	92	26.4	1	112	79	14.69	24.6477	0	101.5	1	0	1	4.4	6.3	4.9	0.4
1156	2	42.6986	5.18	14.2	227	4.3	1	73	16	14	12	190	117	35	66	18	0.63	83	1	0	0	0	0	0	0	0	0	0	165	78.5	96	104	28.8	1	111	68	19.35	24.6497	0	156.3	1	0	0		5.5	5.7	0.11
1157	2	59.2055	4.21	15.1	262	4.3	0.9	47	27	25	15	257	173	171	50	14	0.66	91	0	0	1	0	0	0	1	1	0	1	162	65.8	85	94	25.1	1	147	89	16.22	24.6505	0	92.7	0	0	1		5.5	5.2	0.09
1158	2	78.2959	4.6	12.8	213	4.5	0.7	73	21	15	24	160	79	51	71	16	0.9	128	0	1	1	1	1	0	0	0	0	0	143.9	53.1	76	92	25.6	1	113	73	13.09	24.6516	0	69.1	0	0	0		6.6	4.6	0.02
1159	2	34.0356	7.63	14.1	302	4.2	0.8	74	16	10	9	192	113	49	69	10	0.54	86	0	0	0	0	0	0	0	0	0	0	153.9	50.3	71	93	21.2	0	98	68	12.4	24.6521	0	38.8	0	0	0		5.3	3.8	0.06
1160	2	50.4219	5.18	13.3	292	4.4	1.1	56	21	11	8	181	96	54	74	14	0.66	98	0	0	0	0	0	0	0	0	0	0	157.6	61.9	79	97	24.9	0	101	67	15.26	24.6527	0	76	0	0	1		5.5	4.6	0.07
1161	2	58.526	5.56	14.4	246	4.1	0.7	77	31	63	23	232	139	77	78	17	0.71	101	1	0	0	0	0	0	0	0	0	0	157.3	61.9	93	86	25.1	1	139	88	15.26	24.6527	0	121.4	1	0	0		6.1	5.4	0.84
1162	1	31.189	9.76	17.5	336	4.3	0.9	78	31	64	47	199	134	185	28	8	0.87	87	1	0	1	0	0	1	1	1	0	1	175.6	103.6	106	110	33.4	1	155	105	27.75	26.7857	1	238.1	1	1	0		5.4	9	1.18
1163	2	59.8986	4.25	14	226	4.5	0.9	91	26	24	9	232	152	61	68	14	0.76	102	1	1	1	0	0	0	0	0	0	0	154.7	57.8	88	93.5	24.1	0	118	72	14.25	24.654	0	106.1	1	0	0		5.8	5.5	0.02
1164	2	62.7671	6.67	16.3	287	4.8	2.3	97	38	54	29	174	90	104	63	19	0.75	101	0	1	1	0	0	0	1	1	1	0	158.3	61	76	93	24.3	0	132	93	15.04	24.6557	0	99.5	0	0	0		5.7	6.6	0.35
1165	2	32.9918	4.94	13.8	272	4.5	0.6	55	27	32	77	249	153	144	67	10	0.7	97	0	0	1	0	0	0	0	0	0	0	162.7	65.5	83	103	24.7	0	119	90	16.15	24.6565	0	79.8	0	0	0		5.7	6.5	0.03
1166	2	65.6822	2.58	12.7	206	4.6	1.1	66	37	25	8	207	118	31	83	16	0.63	82	0	1	1	0	0	0	0	0	0	0	151.2	51.1	80	90	22.4	0	110	65	12.6	24.6575	0	66	0	0	0		5.7	4.2	0.02
1167	2	60.3836	5.31	13.7	208	4	0.7	56	31	19	9	188	114	35	67	15	0.67	95	0	0	0	0	0	0	1	1	1	0	149	55.6	83.5	93	25	1	101	75	13.71	24.6583	0	66.1	0	0	0		6.2	5	0.02
1168	2	31.8795	4.59	13.7	216	4.4	0.7	62	19	10	19	165	89	39	68	13	0.68	95	0	0	0	0	0	0	0	0	0	0	160	60.3	84	102	23.6	0	102	62	14.87	24.66	0	81.5	0	0	1		5.5	7	0.16
1169	2	35.0219	8.79	13.5	351	4.3	0.9	57	16	11	8	176	100	140	48	7	0.59	73	0	0	0	0	0	1	0	1	0	0	153.4	53	76	91	22.5	0	104	73	13.07	24.6604	0	85.9	0	0	0		5.3	4.3	0.05
1170	2	67.7151	4.94	12.3	262	4.2	0.6	57	27	15	10	171	104	95	48	13	0.7	79	0	1	1	0	0	1	0	1	0	0	150.2	47.4	72.5	90	21.1	0	118	82	11.69	24.6624	0	62	0	0	0		4.7	4.2	0.21
1171	2	35.4	5.72	14.1	246	4.9	0.8	53	26	18	15	158	69	187	52	8	0.6	90	0	0	0	0	0	0	1	1	0	1	159.7	55.5	77.5	99	21.8	0	122	85	13.69	24.6667	0	89.9	0	0	1		5.3	3.8	0.03
1172	2	54.9973	5.4	12.5	246	4.4	0.6	64	25	29	34	150	76	156	43	15	0.59	93	0	1	1	0	0	1	1	1	1	1	162	63	85	99	24	0	115	90	15.54	24.6667	0	118.7	1	0	0		5.4	4.1	0.06
1173	2	53.9534	5.8	13	301	4.4	0.8	56	22	13	13	242	150	104	71	11	0.72	93	0	0	0	0	0	0	0	0	0	0	153.3	49.9	72.5	85	21.3	0	110	79	12.31	24.6693	0	85.5	0	0	0		5.5	3.5	0.02
1174	2	38.6521	5.61	13.5	350	4	0.9	33	25	22	11	209	134	119	51	10	0.61	84	0	0	0	0	0	0	0	0	0	0	155.5	65.7	86.5	101	27	1	105	70	16.21	24.6728	0	90.7	0	0	0		5.3	5.1	0.02
1175	2	69.7397	6.1	14.2	237	4.2	1.1	59	26	35	43	168	88	163	47	11	0.81	88	1	1	1	0	0	1	1	1	1	1	156.2	70.4	99	104	28.9	1	118	73	17.37	24.6733	0	118.5	1	0	0		5.8	6.9	0.22
1176	2	66.2603	5.06	14.4	219	4.4	1	86	79	114	45	186	106	65	67	17	0.79	90	0	0	1	0	0	0	1	1	1	0	154	53.7	78	90	22.6	0	128	90	13.2503	24.6747	0	97.3079	0	0	0		5.7	4.1	0.04
1177	2	54.3507	7.23	15.8	175	4.4	1	86	28	32	17	171	103	100	48	6	0.59	87	0	0	0	0	0	1	0	1	0	0	160.4	64.6	87	101	25.1	1	111	77	15.94	24.6749	0	122.8	1	0	0		5.3	3.9	0.15
1178	1	63.4164	5.7	17	213	4.6	2	76	30	37	24	212	145	62	55	14	0.9	88	0	1	1	0	0	0	0	0	0	0	157	62.3	84	93	25.3	1	106	61	16.69	26.7897	1	149.5	1	0	0		5.5	8.7	0.08
1179	1	64.3205	6.23	14.6	217	4.2	1	55	70	144	59	136	70	133	39	12	0.94	105	0	1	1	0	0	1	1	1	1	0	164.9	80.4	100	100	29.6	1	117	73	21.54	26.791	1	166.2	1	0	1		6.3	9.4	0.48
1180	1	59.0932	6.16	14.2	216	4.2	0.7	49	22	22	40	199	137	77	47	11	0.8	100	0	0	1	0	0	0	0	0	0	0	167.5	82.9	97	103	29.5	1	141	86	22.21	26.7913	1	124.9	1	0	1		5.2	7.8	1.01
1181	2	39.5644	8.52	14.5	364	4.6	1	87	18	17	17	228	110	399	38	11	0.68	177	1	1	1	1	1	1	1	1	0	1	163.8	77	95	102	28.7	1	121	80	19	24.6753	0	135.9	1	0	1		7.7	4.7	0.44
1182	2	54.4	5.78	14.3	352	4.6	0.7	85	29	24	16	237	142	229	49	16	0.69	132	0	1	1	0	1	1	1	1	0	1	148.2	55.8	76	94.5	25.4	1	142	98	13.77	24.6774	0	90.6	0	0	0		6.2	5.3	0.09
1183	2	69.0384	5.41	12.7	224	4.3	1.4	65	31	28	21	233	127	219	62	13	0.52	102	0	1	1	0	0	0	1	1	0	1	152.1	49.8	78	98	21.5	0	100	66	12.29	24.6787	0	71.3	0	0	0		6.6	5.1	0.16
1184	2	49.8082	4.44	13.4	338	4.4	0.7	99	22	15	8	305	228	68	63	15	0.69	76	1	0	0	0	0	0	0	0	0	0	162.6	68.8	95	102	26	1	91	62	16.98	24.6802	0	98.9	0	0	0		5.3	5.9	0.13
1185	2	52.3123	5.79	13.1	274	4.2	0.8	91	17	10	9	217	154	97	44	14	0.57	102	0	0	0	0	0	1	0	1	0	0	155.9	48.5	74	90	19.9	0	108	72	11.97	24.6804	0	69	0	0	0		5.4	3.3	0.04
1186	2	29.7151	5.98	13.7	338	4.5	1.1	71	14	11	9	182	106	38	68	11	0.56	92	0	0	0	0	0	0	0	0	0	0	154.9	56.4	71	88	23.5	0	97	69	13.92	24.6809	0	67.8	0	0	0		4.9	3	0.05
1187	2	53.4027	4.77	6.3	524	4.2	0.5	67	15	11	12	147	90	47	48	10	0.47	100	1	0	0	0	0	1	1	1	1	0	150.3	66	98	99	29.2	1	120	68	16.29	24.6818	0	106.6	1	0	0		5.1	4.8	0.09
1188	2	40.4548	8.67	14	341	4.2	0.8	58	22	18	9	195	97	218	54	10	0.65	99	1	0	1	0	0	0	1	1	0	1	163	86.7	94.5	112	32.6	1	151	97	21.4	24.6828	0	123.1	1	0	0		5.2	5.2	0.11
1189	2	57.9671	5	13.3	262	4.4	0.9	117	24	25	31	188	101	225	42	16	0.54	95	1	1	1	0	0	1	1	1	0	1	161	74.1	94	95	28.6	1	119	77	18.29	24.6829	0	152	1	0	0		5.4	4.2	0.1
1190	2	59.611	7.81	14.5	295	4.4	0.8	65	27	29	25	211	124	220	43	10	0.5	116	1	0	0	1	1	1	1	1	1	1	153.7	69.4	95	103	29.4	1	117	70	17.13	24.683	0	112.9	1	0	0		6.6	4.3	0.06
1191	2	46.8521	5.41	14.2	422	4.4	0.9	84	21	28	32	165	104	117	38	11	0.74	81	0	0	0	0	0	1	0	1	0	0	157.2	73.4	87	102	29.8	1	116	89	18.12	24.6866	0	124	1	0	0		5.2	4.4	0.41
1192	2	56.6082	4.73	13	246	4.8	0.8	75	30	28	25	205	139	29	60	15	0.64	94	0	0	0	0	0	0	0	0	0	0	154.3	61	79.5	95	25.6	1	105	67	15.06	24.6885	0	89.4	0	0	1		5.7	5.2	0.09
1193	2	60.7808	6.33	13.3	280	4.3	1.1	101	20	23	12	208	143	62	53	12	0.45	86	1	0	1	0	0	0	0	0	0	0	167.8	81.9	111	107	29.1	1	143	94	20.22	24.6886	0	116	1	0	1		5.5	4.1	0.14
1194	1	62.8685	7.33	18	218	4.4	1.7	81	41	48	69	261	188	160	41	9	0.92	107	1	0	0	0	0	0	1	1	0	1	169.6	86.5	104	102	30.1	1	130	86	23.18	26.7977	1	175.8	1	1	0		6.7	5.8	0.33
1195	2	37.5973	5.1	13.5	270	4.4	1.2	46	22	20	26	196	106	48	80	9	0.6	93	0	0	0	0	0	0	0	0	0	0	162.5	77.2	79	103	29.2	1	112	74	19.06	24.6891	0	54.2	0	0	0		5.4	5.7	0.02
1196	2	61.9342	3.97	14.9	265	4.5	0.7	77	26	23	10	184	97	92	69	14	0.57	95	0	0	0	0	0	0	1	1	1	0	153.7	54.8	82	97	23.2	0	109	77	13.53	24.6898	0	104.6	1	0	0		5.4	3.9	0.06
1197	2	59.6164	4.22	13.5	235	4.3	0.9	96	22	18	16	205	78	370	53	8	0.59	100	1	1	1	0	0	0	1	1	1	1	159.4	62.9	92	94	24.8	0	133	73	15.53	24.69	0	98.2	0	0	0		6	6.1	0.11
1198	2	54.4192	3.64	14.2	186	4.3	1.2	158	31	30	27	135	62	67	60	8	0.38	92	0	0	1	0	0	0	0	0	0	0	151.3	46.9	78	85	20.5	0	147	93	11.58	24.6908	0	58	0	0	1		4.2	4.8	0.05
1199	2	59.7781	5.36	14.3	247	4.4	0.9	89	58	42	14	156	96	48	50	14	0.64	94	1	1	1	1	1	0	0	0	0	0	159.5	72.9	95	104	28.7	1	149	93	18	24.6914	0	155.1	1	0	1		7.5	4.7	0.06
1200	2	52.9205	6.08	13.5	322	4.6	1.2	82	75	34	31	217	151	125	41	15	0.61	132	0	1	1	1	1	1	0	1	0	0	163.5	69.9	85	99	26	1	122	64	17.26	24.6924	0	133	1	0	0		6.7	7.3	0.25
1201	2	66.9233	7.47	12.1	290	4.4	0.8	64	19	15	15	174	91	98	63	15	0.59	103	0	1	1	0	0	0	0	0	0	0	151.7	51.1	78	88	22.2	0	127	67	12.62	24.6967	0	90.2	0	0	1		6.2	4.7	0.02
1202	2	52.537	7.18	14.1	386	4.2	0.8	105	20	20	15	230	142	170	54	8	0.59	88	1	0	0	0	0	0	1	1	0	1	153.9	59.6	90	97	25.2	1	102	67	14.72	24.698	0	127	1	0	0		6	4	0.18
1203	2	38.1644	5.27	12.5	254	4.1	0.9	42	22	19	34	238	148	80	74	8	0.64	85	0	0	0	0	0	0	0	0	0	0	150.9	45.3	74	92	19.9	0	102	75	11.19	24.702	0	47.1	0	0	1		5.2	4.5	0.05
1204	2	70.6658	5.01	13.2	280	4.3	1.1	100	25	15	11	175	118	42	49	14	0.68	91	0	1	1	0	0	1	0	1	0	0	153.6	60.4	87	95	25.5	1	117	70	14.92	24.702	0	96.8	0	0	0		6.2	5.7	0.08
1205	2	58.3616	5.95	14.5	319	4.6	1.3	67	26	17	22	220	150	83	53	15	0.74	98	1	0	0	0	0	0	0	0	0	0	159.9	62.1	90	102.5	24.3	0	98	74	15.34	24.7021	0	117.7	1	0	0		5.2	3.4	0.1
1206	1	58.3342	7.31	15.7	320	4.7	0.9	48	72	67	52	180	111	96	50	18	1.17	119	0	1	1	0	0	0	1	1	1	0	171	89.7	98	107	30.7	1	127	91	24.04	26.8004	1	198.9	1	0	0		6.8	4.2	0.17
1207	1	62.0795	5.19	16	163	4.3	1.3	72	23	38	23	185	105	249	30	12	0.68	114	0	1	1	0	0	1	1	1	0	1	156.9	68.8	97	101	27.9	1	123	84	18.44	26.8023	1	116	1	0	1		5.5	4.4	0.02
1208	2	39.0849	8.28	13.9	321	4.7	2.2	69	21	20	19	187	122	134	38	11	0.66	92	0	0	0	0	0	1	0	1	0	0	158.1	65.4	80	95	26.2	1	111	76	16.16	24.7095	0	118.6	1	0	0		5.1	4.9	0.05
1209	2	72.0795	3.8	14.2	238	4.2	1.5	99	22	26	20	153	75	44	69	18	0.69	88	1	1	1	1	1	0	1	1	1	0	156.1	63.9	95	98	26.2	1	129	88	15.79	24.7105	0	151	1	0	0		7	3.4	0.08
1210	2	49.2712	3.66	12.8	319	4.6	0.7	57	18	15	25	249	165	69	70	16	0.65	107	1	0	0	0	0	0	0	0	0	0	154	59.2	88	101	25	1	126	88	14.63	24.7128	0	118.2	1	0	1		5.5	5.1	0.07
1211	2	73.5315	5.82	12.5	218	4.1	0.6	78	19	13	18	282	191	51	81	18	0.89	79	1	0	0	0	0	0	0	0	0	0	163.2	69.8	93	99.5	26.3	1	112	71	17.25	24.7135	0	140.9	1	0	0		5.7	4.3	0.08
1212	2	60.6575	5.85	13.8	296	4.7	1.1	76	24	16	15	204	119	78	69	11	0.77	113	1	1	1	0	0	0	0	0	0	0	156.9	64.7	94	100	26.3	1	112	84	15.99	24.7141	0	97.8	0	0	0		5.7	5.3	0.08
1213	2	22.5836	6.3	12.2	250	4.4	0.8	59	21	9	10	201	120	65	68	8	0.64	94	0	0	0	0	0	0	0	0	0	0	151.7	56.2	77	100	24.4	0	111	68	13.89	24.7153	0	60.4	0	0	1		5	4.4	0.04
1214	2	45.9178	4.66	13	246	3.9	0.8	54	20	13	9	246	165	108	59	11	0.72	115	0	0	0	0	0	0	0	0	0	0	150.7	54.7	83	89	24.1	0	96	63	13.52	24.7166	0	92.9	0	0	0	10.4	5.6	4.8	0.47
1215	2	29.2658	6.16	11.6	272	4.3	0.6	48	15	6	6	192	109	75	68	9	0.72	95	1	0	0	0	0	0	0	0	0	0	162.6	69.1	88	101	26	1	108	80	17.08	24.7178	0	115	1	0	1		5.5	4.1	0.04
1216	2	70.8411	7.58	15	221	4.1	0.5	107	61	94	132	199	112	206	46	11	0.42	159	0	0	0	0	1	1	1	1	1	1	151.3	53.2	80	89	23.3	0	121	69	13.15	24.718	0	118.9	1	0	0		8.2	2.8	0.19
1217	2	36.1315	7.27	13.5	341	4.2	0.7	60	23	19	15	256	192	104	43	12	0.78	91	0	0	0	0	0	1	1	1	1	0	162.8	74.9	82.5	101	28.2	1	100	78	18.52	24.7263	0	122.8	1	0	0		5.6	5	0.22
1218	1	62.0795	6.35	15.3	243	4.4	0.9	66	29	20	19	176	110	80	50	17	1.08	104	0	1	1	0	0	0	0	0	0	0	169.4	73.6	95	98	25.6	1	135	98	19.74	26.8207	1	170.7	1	0	1		6.1	7.6	0.18
1219	2	70.4575	5	11.7	205	4	0.6	49	15	12	13	162	85	133	50	15	0.58	97	1	1	1	0	0	0	1	1	1	0	156.4	60.3	92	100	24.7	0	113	67	14.91	24.7264	0	119.3	1	0	0		6.2	3.6	0.05
1220	2	74.9151	5.47	13.1	247	4.2	1.7	81	23	23	38	145	74	162	39	17	0.73	109	1	1	1	0	0	1	1	1	1	1	159.4	69.6	91	96	27.5	1	138	68	17.21	24.727	0	120.8	1	0	1		6.2	5.1	0.12
1221	2	36.3123	6.27	9.4	373	4.5	0.7	79	18	15	10	194	125	69	55	13	0.52	104	0	0	0	0	0	0	0	0	0	0	162.2	60.5	83	102	23	0	104	86	14.96	24.7273	0	82.6	0	0	0		5.7	4.6	0.16
1222	2	64.4603	4.86	14.2	251	4.2	0.9	73	26	28	23	157	89	171	34	12	0.59	114	1	1	1	0	0	1	1	1	1	1	160.8	70.2	97	95	27.1	1	132	72	17.36	24.7293	0	127.6	1	0	0		6.2	5.2	0.16
1223	2	39.9315	4.52	12.7	270	4.1	1.3	60	21	20	10	180	106	116	51	13	0.74	98	0	0	0	0	0	0	0	0	0	0	152.8	60	77	94	25.6	1	98	69	14.84	24.7333	0	84.8	0	0	0		5.6	3.9	0.14
1224	2	29.6548	5.86	14.8	231	4.2	1	53	17	14	11	155	89	79	50	17	0.54	85	0	0	0	0	0	0	0	0	0	0	157.5	65.7	86	103	26.5	1	90	61	16.25	24.7336	0	100	1	0	0		4.2	3.1	0.02
1225	2	43.4521	6.42	13.8	448	4.6	0.8	58	25	21	25	207	106	83	84	7	0.68	81	0	0	1	0	0	0	0	0	0	0	163.5	58.5	80	92	21.9	0	147	100	14.47	24.735	0	83.9	0	0	1		5.3	3.6	0.05
1226	2	69.3233	5.01	12.4	305	4.6	1	40	32	20	9	155	89	54	55	17	0.75	94	0	0	0	1	1	0	1	1	1	0	147.6	43.7	68.5	79	20.1	0	121	62	10.81	24.7368	0	66.7	0	0	0		6.6	4.9	0.07
1227	2	51.8301	4.47	11.3	380	4.5	0.7	55	23	17	14	257	166	111	69	9	0.62	90	0	0	0	0	0	0	0	0	0	0	150	46.2	67	82	20.5	0	110	63	11.43	24.7403	0	71.7	0	0	1		5.6	3.6	0.02
1228	2	66.9918	6.1	14.5	322	4.2	0.8	65	51	65	58	289	195	103	73	15	0.55	122	1	0	1	0	0	0	0	0	0	0	162	67.5	95	100	25.7	1	135	92	16.7	24.7407	0	147	1	0	1		6.7	4.1	0.11
1229	2	63.5288	4.25	14.6	332	4.3	0.8	60	22	23	18	217	128	95	70	14	0.57	85	0	0	0	0	0	0	0	0	0	0	151	54.6	83	90	23.9	0	119	75	13.51	24.7436	0	104.8	1	0	1		5.4	6.3	0.02
1230	2	47.2438	4.19	13.3	188	4.2	0.9	69	26	23	11	229	138	76	76	13	0.63	88	0	0	0	0	0	0	0	0	0	0	151.6	47	71	90	20.3	0	91	66	11.63	24.7447	0	75	0	0	1		5.7	4.4	0.05
1231	2	59.1425	5.89	14.2	259	4.3	0.8	95	23	16	28	192	121	68	57	13	0.78	81	0	0	0	0	0	0	0	0	0	0	151	47	79	91	20.6	0	137	89	11.63	24.7447	0	81.7	0	0	1		5.1	5.2	0.21
1232	2	55.5562	6.25	14.1	351	4.4	0.9	121	33	32	10	230	147	134	56	12	0.71	74	1	0	0	0	0	0	0	0	0	0	154	59.2	96	91	25	1	114	85	14.65	24.7466	0	96.1	0	0	0		5.7	5.2	0.08
1233	1	32.7644	8.24	16	304	4.5	1.6	93	33	36	44	246	183	98	43	18	0.84	91	1	0	0	0	0	0	0	0	0	0	170	83.7	102	104	29	1	127	85	22.45	26.822	1	122.6	1	0	0		5.4	4.8	0.37
1234	1	61.611	5.89	16.6	178	4.5	1.5	64	30	33	31	217	149	85	51	8	1.02	98	0	0	1	0	0	0	0	0	0	0	162.8	72.4	88	100	27.3	1	123	91	19.42	26.8232	1	165.3	1	0	0		5.5	5.8	0.29
1235	2	50.0356	6.15	13.7	345	4.2	0.8	40	17	12	9	177	103	110	52	6	0.64	90	0	0	0	0	0	0	0	0	0	0	153.5	55.8	73.5	94	23.8	0	113	84	13.81	24.7491	0	86	0	0	1		5.4	4.9	0.02
1236	2	41.611	6.34	14.3	255	4.1	1	90	44	65	207	252		569	59	6	0.41	84	1	0	0	0	0	0	1	1	0	1	157.1	70.1	97	104	28.4	1	118	82	17.35	24.7504	0	73.3	0	1	1		4.9	5.7	1.17
1237	1	76.7096	7.64	15.2	382	4.4	0.7	45	22	22	20	140	74	102	46	11	0.94	109	0	1	1	1	1	0	1	1	1	0	162.5	69.8	93	93	26.4	1	155	83	18.73	26.8338	1	148.1	1	0	0		6.7	5.9	0.2
1238	2	54.6466	6.99	15.2	242	4.4	0.9	84	58	76	27	275	196	172	45	12	0.74	100	1	0	0	0	0	1	1	1	0	1	159.6	70.7	91	104	27.6	1	120	79	17.5	24.7525	0	119.3	1	0	0		6	5.6	0.33
1239	2	67.789	5.21	13.9	292	4.5	1.5	104	27	29	39	302	185	350	47	13	0.81	117	0	0	0	0	0	1	1	1	0	1	162	62.7	85	95.5	23.9	0	80	64	15.52	24.7528	0	127	1	0	0		6.5	6.4	0.27
1240	2	28.5452	7.2	14.8	283	4.3	0.7	49	15	12	8	173	100	73	58	16	0.76	85	0	0	0	0	0	0	0	0	0	0	150.6	50.7	73	94	22.2	0	104	73	12.55	24.7535	0	55.7	0	0	0		5.3	4.5	0.03
1241	2	59.7562	6.63	12.8	319	5	1.6	119	30	34	61	147	93	54	43	13	0.68	144	1	1	1	0	1	1	1	1	1	0	159.6	71.3	89.5	95	28	1	142	77	17.65	24.7546	0	93.9	0	0	0		6.5	4.7	0.04
1242	2	41.4658	4.12	13.3	288	4.1	0.7	72	22	25	25	213	105	266	55	12	0.53	110	1	0	0	0	0	0	1	1	0	1	159.8	69.6	88	98	27.3	1	104	75	17.23	24.7557	0	111.2	1	0	0		5.6	5	0.1
1243	2	54.074	4.11	13.4	246	4.1	1	103	26	17	11	223	127	134	69	12	0.64	90	0	0	0	0	0	0	0	0	0	0	158.9	63.5	83	99	25.1	1	128	85	15.72	24.7559	0	95	0	0	0		5.6	4.3	0.12
1244	2	54.6329	5.88	13	175	4.4	0.5	66	34	24	33	144	51	65	80	9	0.6	69	1	0	1	1	1	0	1	1	1	0	153.8	64.3	90	96	27.2	1	148	94	15.92	24.7589	0	108.2	1	0	1		6.7	5.5	0.09
1245	2	31.3589	6.38	13.5	213	4.1	0.6	42	17	9	7	216	139	64	64	8	0.64	78	0	0	0	0	0	0	0	0	0	0	158.4	66.4	85	98	26.6	1	115	84	16.44	24.759	0	88.7	0	0	1		5.4	5.2	0.05
1246	2	61.8822	6.89	12.6	321	4.4	0.9	47	25	14	27	232	161	86	54	16	0.77	98	0	0	1	0	0	0	0	0	0	0	153.9	47.9	84	86	20.2	0	124	91	11.86	24.7599	0	91.5	0	0	0		5.9	4.8	0.03
1247	2	32.8712	4	12.3	226	4.3	0.6	80	23	27	21	206	118	104	67	9	0.46	82	0	0	0	0	0	0	0	0	0	0	153.1	52.1	71	87	22.3	0	108	66	12.9	24.7601	0	63.8	0	0	0		4.8	4.1	0.25
1248	2	32.3178	4.48	13.6	237	4.3	0.4	49	14	9	9	169	98	57	60	14	0.52	92	0	0	0	0	0	0	0	0	0	0	159.7	60.5	87	99	23.7	0	101	76	14.98	24.7603	0	68.4	0	0	0		5.2	4.3	0.03
1249	2	40.126	6.3	13.9	365	4.4	0.9	38	26	23	18	264	174	119	66	11	0.77	103	1	0	1	0	0	0	0	0	0	0	159.2	68.9	95	104.5	27.2	1	126	97	17.06	24.7605	0	117.9	1	0	1		5.3	4.1	0.07
1250	2	38.3151	4.26	12.9	323	4.2	0.6	90	29	35	15	211	128	164	50	10	0.8	74	1	0	0	0	0	0	1	1	0	1	159.1	64.2	88	102	25.4	1	102	72	15.8966	24.761	0	76.7212	0	0	0		5	6.1	0.11
1251	2	39.6027	5.19	10.7	332	4.2	1.2	72	14	13	14	212	141	160	39	7	0.6	88	1	0	0	0	0	1	1	1	1	1	160.4	73.3	93	108	28.5	1	111	73	18.15	24.7613	0	111	1	0	0		5.4	4.5	0.32
1252	2	43.4301	6.85	13.4	331	4.4	1.6	66	27	26	16	205	128	181	41	9	0.68	105	1	0	0	0	0	1	1	1	0	1	162.3	88.3	101	109	33.6	1	128	81	21.87	24.7678	0	141.2	1	0	0		5.8	5	0.46
1253	2	54.1589	5.13	12.9	233	4.3	0.9	76	21	16	12	138	60	109	56	10	0.62	99	0	0	0	0	0	0	0	0	0	0	153	56.2	87	94	24	0	132	89	13.92	24.7687	0	76.4	0	0	0		5.3	4.7	0.39
1254	2	58.074	4.59	13.4	235	4.3	0.8	67	26	19	20	200	120	72	66	11	0.57	92	0	0	0	0	0	0	0	0	0	0	153.1	56.2	84	94	24	0	99	76	13.92	24.7687	0	93.7	0	1	0		5.6	4.3	0.05
1255	2	59.1918	6.35	13.4	304	4.4	1.2	146	31	41	49	172	95	54	66	18	0.74	88	1	0	0	0	0	0	0	0	0	0	153.2	61.2	88	95	26.1	1	111	71	15.16	24.7712	0	103.3	1	0	0		5.4	4	0.13
1256	2	60.2356	4.16	12.5	389	4	0.6	86	26	18	11	237	160	157	46	21	0.58	89	1	0	0	0	0	1	1	1	0	1	153	61.2	91	98	26.1	1	110	81	15.16	24.7712	0	111.3	1	0	0		5.5	3.9	0.02
1257	2	52.8082	5.78	14.6	204	4.2	1	90	22	5	18	190	118	78	56	14	0.73	94	0	0	0	0	0	0	0	0	0	0	149.1	54.9	85	95	24.7	0	86	63	13.6	24.7723	0	77	0	0	0		5.6	4	0.06
1258	2	30.6247	6.34	13.8	381	4.6	0.7	54	11	9	19	211	125	108	64	7	0.85	92	0	0	0	0	0	0	0	0	0	0	159.5	59.3	85	96	23.3	0	107	73	14.69	24.7723	0	56.3	0	1	1		5.3	5.2	0.39
1259	2	55.2082	3.6	13.5	308	4.3	1.3	80	24	26	17	220	145	85	58	11	0.71	114	1	1	1	0	0	0	0	0	0	0	161.1	68.3	91	99	26.3	1	116	77	16.92	24.7731	0	147.1	1	0	0		6.1	3.4	0.08
1260	2	28.1342	7.05	13.9	318	4.6	0.9	59	15	15	11	160	98	49	52	7	0.52	84	0	0	0	0	0	0	0	0	0	0	158.3	58	75	96	23.1	0	115	83	14.37	24.7759	0	63	0	0	0		5.1	4.1	0.09
1261	2	59.7233	5.55	12.5	282	4.2	0.9	58	34	34	12	198	117	125	56	12	0.65	91	1	0	0	0	0	0	0	0	0	0	159.4	65.1	93	100	25.6	1	106	66	16.13	24.7773	0	123	1	0	0		5.4	5.3	0.06
1262	2	51.0466	5.15	13	246	4.3	0.7	45	27	20	8	226	151	73	60	12	0.73	93	0	0	0	0	0	0	0	0	0	0	148.9	47.3	79	90	21.3	0	91	64	11.72	24.778	0	64.5	0	0	0		5.6	4.6	0.02
1263	2	54.3123	3.66	13.9	266	4.4	1.4	92	34	28	17	232	164	62	56	13	0.63	103	1	1	1	0	0	0	0	0	0	0	158.8	64.2	91	96	25.5	1	101	74	15.91	24.7819	0	138.8	1	0	0		5.5	4.2	0.09
1264	1	75.2986	4.65	13.9	280	4.1	0.9	67	29	24	17	134	60	63	61	12	0.89	91	0	0	0	0	0	0	1	1	1	0	162	69.1	89	92	26.3	1	130	73	18.55	26.8452	1	89.7	0	0	1		5.6	4.6	0.1
1265	1	68.0521	7.37	15.8	208	4.4	0.8	47	57	43	50	174	84	247	41	12	0.75	102	0	0	1	0	0	0	1	1	0	1	159.6	71.8	96	97	28.2	1	150	95	19.29	26.8663	1	148.2	1	0	1		5.7	3.6	0.26
1266	2	56.1041	3.18	13	347	4.6	0.8	92	23	16	21	258	168	44	81	12	0.87	83	0	0	0	0	0	0	1	1	1	0	153.9	55.2	81	98	23.3	0	105	71	13.68	24.7826	0	87.5	0	0	0		5.7	5.7	0.04
1267	2	58.1863	6.85	13.8	269	4.3	0.7	94	22	19	13	227	148	119	55	8	0.6	85	1	0	0	0	0	0	0	0	0	0	162.8	62.1	88	99	23.4	0	111	68	15.39	24.7826	0	122	1	0	0		5.3	4.9	1.35
1268	2	60.8767	5.04	13.8	299	4.3	1.5	66	24	22	10	213	139	126	49	12	0.75	97	0	1	1	0	0	1	1	1	1	0	157.7	64.8	86	96	26	1	126	88	16.06	24.784	0	117.8	1	0	0		5.7	5.5	0.03
1269	1	72.2384	5.45	14.2	280	4.2	0.9	53	21	19	40	167	89	137	51	15	1.14	98	0	0	0	0	0	0	1	1	1	0	158	63.1	89	94	25.3	1	109	65	16.96	26.878	1	113.6	1	0	0		5.5	6.5	0.05
1270	1	50.6192	6.09	15.7	243	4	0.7	60	21	18	52	205	108	284	40	11	0.87	111	1	0	0	0	0	0	1	1	0	1	166.2	91.1	102	106	33	1	117	86	24.49	26.8825	1	169.8	1	1	1		5.8	5.6	0.21
1271	1	60.126	5.8	15.6	262	4.5	1.4	54	46	70	33	187	129	95	39	16	0.91	88	1	1	1	0	0	1	0	1	0	0	170.8	82.3	102	100	28.1	1	124	89	22.13	26.8894	1	148.9	1	0	1		5.7	6.7	0.03
1272	2	43.8493	3.97	13.7	246	4.5	0.8	32	17	13	10	187	105	70	68	10	0.66	105	0	0	0	0	0	0	0	0	0	0	155	60.2	87	100	25.1	1	116	73	14.92	24.7841	0	72.2	0	0	1		5.2	4.4	0.04
1273	1	54.7178	5.63	14.8	277	4.6	1.1	65	23	31	43	252	185	111	45	16	0.98	136	0	0	0	0	1	0	0	0	0	0	168.8	83.3	97	98	29.2	1	127	87	22.4	26.8908	1	185.8	1	0	1		6.2	5.1	0.19
1274	2	60.4384	3.39	12.1	220	4.4	0.9	57	20	14	6	179	111	29	62	15	0.53	76	1	0	0	0	0	0	0	0	0	0	154.2	58.1	89	95	24.4	0	91	68	14.4	24.7849	0	83.3	0	0	0		5.1	3.9	0.03
1275	2	49.6658	5.5	13.9	235	4.3	0.8	65	20	26	62	138	58	126	55	11	0.73	129	1	1	1	0	1	0	0	0	0	0	155.3	61	91	98	25.3	1	121	90	15.12	24.7869	0	78.9	0	0	1		6	4.1	0.04
1276	2	48.2137	7.12	12.8	371	4.1	0.9	78	22	22	46	177	78	290	41	10	0.53	81	1	1	1	0	0	1	1	1	0	1	159	87.1	106	110	34.5	1	119	73	21.59	24.7876	0	117.3	1	0	0		6	6.4	0.72
1277	2	39.9562	4.63	14.4	217	4.6	1	54	24	15	10	252	155	37	90	17	0.65	63	0	0	0	0	0	0	0	0	0	0	153.4	47.4	70	94	20.1	0	110	65	11.75	24.789	0	77	0	0	0		5	5.9	0.02
1278	2	39.4082	7.03	13	267	4.1	1.2	58	17	9	8	144	74	42	62	14	0.62	79	0	0	0	0	0	0	0	0	0	0	151.1	55.6	77	90	24.4	0	121	83	13.7862	24.7953	0	56.3688	0	0	1		5.1	4.2	0.03
1279	2	66.3315	5.76	12.2	359	4.2	0.8	53	20	18	10	207	116	81	75	16	0.62	98	0	0	1	0	0	0	0	0	0	0	151.6	59	84	94	25.5	1	138	91	14.63	24.7966	0	75.5	0	0	0		5.7	3.8	0.06
1280	1	35.2247	10.87	16.2	272	4.5	0.9	118	64	123	47	199	131	149	38	12	0.97	100	1	0	0	0	0	1	0	1	0	0	178.6	103.3	111.5	114	32.4	1	123	79	27.78	26.8925	1	167.8	1	1	0		5.7	7.1	0.9
1281	2	63.6192	5.74	14.5	338	4.5	0.9	81	20	17	9	200	107	55	82	13	0.62	123	1	1	1	0	0	0	1	1	1	0	156.6	64	90	99	26.1	1	130	84	15.87	24.7969	0	77.4	0	0	0		6	3.8	0.1
1282	2	39.9452	7.15	12.4	307	4.4	0.6	56	17	13	13	190	106	111	62	13	0.62	84	0	0	0	0	0	0	0	0	0	0	157.7	70	84.5	98	28.1	1	109	75	17.36	24.8	0	116.6	1	0	0		5.3	3.2	0.27
1283	2	60.1781	3.14	12.7	264	4.3	0.9	79	27	22	13	239	143	65	83	13	0.64	77	0	0	0	0	0	0	0	0	0	0	157.5	58.1	70	90	23.4	0	103	78	14.41	24.8021	0	112.1	1	0	0		5.2	4.6	0.08
1284	2	60.8384	10.37	14.3	224	4.4	1.1	84	33	8	15	228	149	68	65	13	0.7	84	1	0	1	0	0	0	0	0	0	0	155.8	63.5	91	93	26.1	1	167	104	15.75	24.8031	0	132.9	1	0	0		5.4	4.8	2.34
1285	2	44.7315	5.45	13.1	257	4.4	1.3	52	17	11	10	192	121	54	60	11	0.73	91	0	0	0	0	0	0	0	0	0	0	158.8	58.5	74	99	23.2	0	110	70	14.51	24.8034	0	104.9	1	0	1		5.5	4.5	0.04
1286	2	53.863	4.6	12.8	220	4.2	1	61	17	14	25	246	169	80	61	13	0.57	105	0	0	0	0	0	0	0	0	0	0	153	63.7	82	98	27.2	1	97	69	15.8	24.8038	0	109.6	1	0	0		6.6	5.1	0.09
1287	2	59.6658	10.21	14.1	263	4.1	1.1	92	17	12	21	245	162	93	64	11	0.6	108	1	0	0	0	0	0	0	0	0	0	159.7	64.1	91	96	25.1	1	119	60	15.9	24.805	0	152.5	1	0	0		6	4.9	0.25
1288	2	67.9425	5.08	11.8	220	4	0.8	58	20	15	11	164	83	41	73	13	0.78	74	0	0	0	0	0	0	0	0	0	0	157.6	67	80	99	26.8	1	106	75	16.62	24.806	0	102.3	1	0	0		5.4	4.1	0.13
1289	2	41.6521	7.21	13.4	355	4.2	0.8	80	22	36	12	183	127	98	36	13	0.78	106	1	0	0	1	1	1	0	1	0	0	164.8	89	95	106.5	32.7	1	121	81	22.08	24.809	0	122.2	1	1	1		6.3	5.4	0.31
1290	1	44.0055	6.81	16.5	251	4	1.2	48	50	90	49	175	114	95	42	8	0.73	84	1	1	1	0	0	0	0	0	0	0	176.3	113.7	113	112	36.6	1	121	83	30.58	26.8953	1	135.6	1	1	0		6.1	6.2	1.07
1291	2	52.0082	4.38	15.3	244	4.4	0.8	49	29	33	14	211	132	79	63	14	0.71	87	0	0	0	0	0	0	0	0	0	0	158.5	60.5	82	93	23.9	0	104	75	15.01	24.8099	0	137.7	1	0	0		5.7	5.9	0.03
1292	2	82.6548	5.64	12.1	276	4.1	1	62	33	24	13	208	139	104	48	13	0.81	100	1	1	1	0	0	1	0	1	0	0	148.1	51.5	95	99	23.5	0	129	62	12.78	24.8155	0	60.9	0	0	0		5.6	4.6	0.14
1293	1	53.4932	7.78	17.7	280	4.5	1.1	122	79	93	79	259		420	42	12	0.82	150	1	0	1	0	1	0	1	1	0	1	169.5	86.8	102	101	30.2	1	173	104	23.35	26.9009	1	181.2	1	1	0		7.5	5.9	0.17
1294	2	62.2658	3.77	13	202	4.3	1.6	68	22	16	21	228	143	50	75	12	0.69	75	0	1	1	0	0	0	0	0	0	0	154.1	60.4	84	101	25.4	1	107	67	14.99	24.8179	0	77.8	0	0	0		5.4	4.4	0.09
1295	2	50.5863	5.35	12.6	226	4.1			20	18	41	197	108	99	69		0.65	85	0	0	0	0	0	0	0	0	0	0	159.9	55.2	82	96	21.6	0	103	74	13.7	24.8188	0	58.3	0	0	0		5.5		0.04
1296	2	47.211	8.44	12.9	293	4	0.8	88	26	19	28	197	113	130	58	12	0.67	89	0	0	0	0	0	0	0	0	0	0	151.2	55.6	86	101	24.3	0	89	61	13.8	24.8201	0	84.8	0	0	0		5.4	4.5	0.1
1297	2	59.7781	5.51	12.8	332	4.5	0.9	58	36	21	14	268	195	73	58	12	0.74	83	0	0	0	0	0	0	0	0	0	0	160.2	55.6	75	93	21.7	0	98	64	13.8	24.8201	0	97.4	0	0	0		5.6	4.6	0.13
1298	2	53.0521	6.89	14.4	264	4.6	1	55	39	43	16	244	175	97	50	10	0.57	103	0	0	1	0	0	0	0	0	0	0	149.7	50.2	81	84.5	22.3	0	131	100	12.46	24.8207	0	80.4	0	0	1		5.7	3.5	0.02
1299	2	59.4904	5.31	14.3	240	4.2	1.4	49	31	27	10	191	81	82	94	10	0.7	97	0	0	0	0	0	0	0	0	0	0	162.3	61.6	83	102	23.4	0	103	67	15.29	24.8214	0	90.6	0	0	0		5.4	3.9	0.05
1300	2	54.9644	5.38	12.3	348	4.4	0.8	86	22	13	17	191	117	88	56	21	0.66	85	0	0	0	0	0	0	1	1	1	0	154.2	59.3	83	96.5	24.9	0	112	79	14.72	24.8229	0	93.4	0	0	0		5.5	4.1	0.42
1301	2	76.3205	4.66	13.5	338	4.6	1	70	32	19	15	194	106	64	75	13	0.51	86	0	0	0	0	0	0	0	0	0	0	149.3	45.2	75	90	20.3	0	112	80	11.22	24.823	0	58.7	0	0	0		5.8	4.5	0.05
1302	2	38.1041	4.21	13.9	201	4.2	1	39	20	20	9	190	97	77	78	11	0.68	88	0	0	0	0	0	0	0	0	0	0	153.4	48.5	73	89	20.6	0	93	65	12.04	24.8247	0	73.6	0	0	1		4.9	4.9	0.02
1303	1	68.7233	8.89	14.5	360	4.6	0.9	52	33	41	52	170	100	68	56	13	1.1	128	1	1	1	1	1	0	1	1	1	0	171.9	98.2	110	113	33.2	1	143	85	26.42	26.9043	1	175.8	1	0	1		7.2	8.6	0.13
1304	2	48.1644	6.37	14.1	392	4.6	2.3	79	23	21	26	345	241	264	51	12	0.59	92	0	0	0	0	0	0	1	1	0	1	159.5	60.5	81	93	23.8	0	113	87	15.02	24.8264	0	96.3	0	0	0		5.9	5.1	0.17
1305	1	44.9178	5.91	14.9	310	4.3	0.9	76	22	3	31	195	77	423	33	11	0.78	119	1	0	1	0	0	1	1	1	0	1	176.5	99.2	107	110	31.8	1	154	110	26.69	26.9052	1	158	1	0	1		6.6	6.4	0.47
1306	2	61.5616	6	13.6	321	4.5	0.8	102	61	50	32	221	141	53	69	14	0.67	101	0	1	1	0	0	0	1	1	1	0	154.1	57.8	87	95	24.3	0	102	71	14.35	24.827	0	100.3	1	0	0		5.9	3.7	0.09
1307	1	36.6685	8.66	16.8	226	4.4	0.9	70	80	153	70	222		473	43	8	0.79	106	1	0	1	0	0	0	1	1	0	1	169.7	95.8	108	112	33.3	1	131	91	25.78	26.9102	1	145	1	0	1	43.2	5.6	6.9	0.71
1308	2	54.4192	7.27	14.4	333	4.4	0.2	77	41	22	7	226	137	53	78	18	0.99	75	1	0	0	0	0	0	0	0	0	0	165	81.2	96.5	102.5	29.8	1	129	88	20.16	24.8276	0	108.5	1	0	1		5.8	6.5	0.1
1309	1	67.2795	11.32	17.1	220	4.5	0.7	93	42	48	95	140	67	134	46	12	1.1	139	0	1	1	1	1	0	1	1	1	0	161.5	63.9	90	97	24.3	0	119	75	17.1981	26.9141	1	175.732	1	0	0		8.7	5.8	0.05
1310	2	39.4301	4.28	13.8	335	4.6	0.6	45	30	25	14	221	147	74	59	7	0.72	96	0	0	0	0	0	0	0	0	0	0	160.9	63.8	84	101	24.6	0	108	85	15.84	24.8276	0	110.6	1	0	1		5.1	5.2	0.02
1311	2	60.6986	5.47	13.2	357	4.4	0.7	86	51	50	22	188	89	75	84	13	0.52	120	1	1	1	0	0	0	1	1	1	0	162.4	78.3	99.5	99	29.7	1	130	79	19.44	24.8276	0	176.4	1	0	0		6.6	5.6	0.15
1312	2	74.326	4.23	13.3	342	4.4	0.8	46	18	11	9	257	191	95	47	13	0.61	101	0	0	0	0	0	1	0	1	0	0	153.4	58.2	87	92	24.9	0	126	67	14.45	24.8282	0	100	1	0	0		6	3.9	0.06
1313	2	23.7616	7.09	15.2	359	4.5	1	76	17	10	12	180	94	117	63	9	0.61	88	0	0	0	0	0	0	0	0	0	0	157.8	55.5	78	97	22.3	0	111	79	13.78	24.8288	0	71.7	0	1	0		5.1	6	0.06
1314	1	79.9836	7.38	12.5	286	4.2	0.7	79	20	12	14	156	87	114	46	34	1.74	90	0	1	1	0	0	0	0	0	0	0	160.8	68.5	95	93	26.5	1	139	63	18.44	26.9197	1	117.2	1	1	0		5.8	10.3	0.26
1315	2	62.7068	5.91	13.6	258	4.3	0.6	117	31	32	86	219	133	89	68	8	0.47	73	0	0	0	0	0	0	1	1	1	0	158.2	55.9	82	92	22.3	0	114	76	13.88	24.8301	0	103.3	1	0	0		5.8	3.4	0.61
1316	2	59.2	5.17	13.1	236	4.4	0.8	67	20	9	10	198	116	126	57	9	0.75	84	0	0	0	0	0	0	0	0	0	0	158.2	62.7	80	98.5	25.1	1	137	81	15.57	24.8325	0	100.9	1	0	0		5.5	4.2	0.05
1317	2	59.989	5.81	13.6	320	4.2	1.2	81	22	22	12	239	161	159	46	15	0.66	90	0	1	1	0	0	1	1	1	0	1	149.8	57.9	87	88	25.7	1	107	72	14.38	24.8359	0	115.8	1	0	0		5.9	3.8	0.09
1318	2	53.2027	7.04	12.6	285	4.6	0.9	79	22	14	10	135	56	103	58	7	0.62	88	0	1	1	0	0	0	0	0	0	0	157.3	46.1	67	87	18.6	0	121	93	11.45	24.8373	0	61.5	0	0	0		5.4	4.2	0.03
1319	2	55.6356	3.62	12.9	363	4.2	1.6	56	22	16	8	248	162	52	76	14	0.56	68	0	0	0	0	0	0	0	0	0	0	156.5	50.4	79	97	20.6	0	84	54	12.52	24.8413	0	72	0	0	0		5.3	4.3	0.09
1320	2	33.4384	5.51	13.2	238	4.1	0.8	48	26	15	7	185	118	93	48	8	0.6	90	1	0	0	0	0	1	0	1	0	0	162.2	72.7	88	106	27.6	1	94	73	18.06	24.8418	0	108.5	1	0	1		5.2	3.8	0.07
1321	2	38.7973	5.2	14.3	292	4.6	0.8	48	27	18	11	168	78	172	56	10	0.73	84	0	0	0	0	0	0	1	1	0	1	156.1	51	73	96	20.9	0	94	68	12.67	24.8431	0	83.2	0	1	0		5.4	4.1	0.03
1322	2	66.7534	4.28	11.6	235	4.1	1.5	60	18	15	40	210	143	61	55	16	0.82	102	0	1	1	0	0	0	0	0	0	0	151.4	54.5	79	95	23.9	0	125	69	13.54	24.844	0	74.5	0	0	1		5.9	5.1	0.19
1323	2	50.526	6.74	13.5	311	4.6	1	74	35	30	16	256	176	153	49	12	0.75	81	0	0	1	0	0	1	1	1	0	1	144.3	35.7	65	79.5	17.1	0	117	96	8.87	24.8459	0	59.9	0	0	0		5.7	5.8	0.58
1324	2	34.789	4.99	13.5	211	4.2	0.7	63	14	10	9	185	122	77	48	15	0.5	95	1	0	0	0	0	1	0	1	0	0	162.4	71.6	91	107	27.1	1	90	69	17.79	24.8464	0	80.9	0	0	1		5.7	4.3	0.08
1325	2	50.3452	6.79	13.9	357	4.4	0.6	80	20	14	14	198	106	77	77	14	0.66	70	1	0	0	0	0	0	0	0	0	0	157.6	64.3	93	102	25.9	1	91	63	15.98	24.8523	0	128.3	1	0	1		5.9	6.4	1.97
1326	2	63.663	3.3	10.5	202	4.1	0.6	58	25	11	11	217	152	69	51	19	1.03	90	0	1	1	0	0	0	0	0	0	0	150.7	54.2	84	87	23.9	0	115	81	13.47	24.8524	0	98.8	0	0	0	8.7	5.4	4	0.04
1327	2	40.1123	5.39	13.1	258	4.3	1	42	22	13	10	188	89	49	89	9	0.57	83	0	0	0	0	0	0	0	0	0	0	162.5	61	81	102	23.1	0	109	70	15.16	24.8525	0	90.1	0	0	1		5.2	4.8	0.02
1328	2	62.4329	4.33	14.6	208	4.5	0.6	92	28	30	39	225	124	174	66	20	0.6	112	0	0	0	0	0	0	1	1	0	1	153.8	55.6	75	92	23.5	0	115	77	13.82	24.8561	0	91.3	0	0	0		5.9	5.1	0.09
1329	2	57.7808	7.45	13.1	356	4.7	0.8	86	41	40	24	219	144	90	57	12	0.64	128	1	0	1	0	1	0	1	1	1	0	159.6	59.3	88	100	23.3	0	171	95	14.74	24.8567	0	99.7	0	0	0		6.4	4.7	0.17
1330	2	52.2795	6.03	13.2	282	4.2	1	40	54	61	29	178	117	94	42	10	0.6	112	1	0	0	0	0	1	0	1	0	0	157.4	67.5	94	105	27.2	1	99	64	16.78	24.8593	0	92.4	0	0	0		6.2	5.1	0.2
1331	1	44.8795	8.49	15.5	233	4.1	0.5	74	47	66	114	207	117	233	43	11	0.86	107	1	0	0	0	0	0	1	1	0	1	177.5	100.4	114	115	31.9	1	130	81	27.04	26.9323	1	165.1	1	0	0		5.6	8.1	0.33
1332	2	71.6712	6.22	13.1	323	4.5	0.8	63	25	22	10	200	100	65	87	10	0.66	93	0	0	0	0	0	0	1	1	1	0	152.9	50	80	90	21.4	0	127	85	12.43	24.86	0	91.8	0	0	0		5.5	4.1	0.87
1333	2	54.726	3.22	12.4	218	4.4	0.6	68	17	14	14	212	133	109	57	11	0.55	93	0	0	0	0	0	0	0	0	0	0	150.2	53.9	80	97	23.9	0	123	78	13.4	24.8609	0	84.9	0	0	0		5.4	4.7	0.18
1334	2	54.011	5.9	14.6	220	4.2	0.6	94	30	25	32	200	120	120	56	17	0.73	107	1	0	0	0	0	0	0	0	0	0	158.9	68.7	90	96	27.2	1	111	86	17.08	24.8617	0	122.6	1	0	0		5.7	5	0.1
1335	2	70.1616	3.39	11.2	234	4.1	0.9	70	29	11	21	176	98	47	69	11	0.76	96	0	1	1	0	0	0	1	1	1	0	152.6	58.6	83	95	25.2	1	114	71	14.57	24.8635	0	91.3	0	0	0		6.4	4.9	0.13
1336	2	47.0932	3.97	13.6	293	4.5	0.9	56	24	17	36	178	84	59	82	15	0.59	85	0	0	0	0	0	0	0	0	0	0	152.2	55.1	79	102	23.8	0	101	77	13.7	24.8639	0	72.6	0	0	0		5.3	4.4	0.03
1337	2	71.0767	7.82	14.8	394	4.1	1	98	31	29	69	266	164	233	55	15	0.71	107	1	0	0	0	0	0	1	1	0	1	153.1	66.8	103	99	28.5	1	136	83	16.61	24.8653	0	115.5	1	0	0		5.7	5.6	0.4
1338	2	51.0438	5.37	13.8	330	4.1	0.7	56	23	21	18	249	168	72	67	10	0.6	95	0	0	0	0	0	0	0	0	0	0	157	59.4	86	95	24.1	0	101	87	14.77	24.8653	0	88.1	0	0	1		5.7	3.7	0.12
1339	1	67.8767	4.41	13.6	198	4.5	1.3	87	30	32	24	140	68	124	47	12	0.72	104	1	1	1	1	1	0	1	1	1	0	176	90.4	104	105	29.2	1	136	82	24.35	26.9358	1	327.4	1	0	0		6.1	5.9	0.06
1340	2	44.8356	4.96	12.6	302	4.3	0.9	55	26	19	13	205	132	59	61	9	0.54	83	0	0	0	0	0	0	0	0	0	0	151.3	49.1	70	88	21.4	0	96	66	12.21	24.8676	0	79.8	0	0	0		5.5	2.9	0.06
1341	2	49.2466	3.71	12.8	170	4.3	0.6	47	26	21	15	243	140	75	88	11	0.61	85	0	0	0	0	0	0	0	0	0	0	150.3	47.4	75	86	21.1	0	115	70	11.79	24.8734	0	117.8	1	0	0		5.1	4.1	0.03
1342	2	36.9068	4.22	10.8	323	4.4	0.5	77	22	12	26	188	115	52	63	9	0.78	73	0	0	0	0	0	0	0	0	0	0	156.1	59.3	81	96	24.3	0	109	67	14.75	24.8735	0	80.4	0	0	1		5.8	4	0.03
1343	2	62.8247	2.48	10.6	202	4.2	0.7	81	25	27	20	173	107	108	44	15	0.68	90	0	0	0	0	0	1	1	1	1	0	158.3	56.6	77	94	22.7	0	134	81	14.08	24.8763	0	79.6	0	0	0		6.1	4.4	0.05
1344	2	77.5342	7.32	14.4	256	4.7	0.9	130	76	19	18	188	116	112	50	13	0.9	99	0	0	0	0	0	0	0	0	0	0	150.2	44.5	81	87	19.7	0	127	84	11.07	24.8764	0	69	0	0	0		5.2	3.5	0.18
1345	1	36.1644	5.41	17.1	237	4.3	1.2	69	25	32	110	267	158	115	86	17	0.78	94	1	0	0	0	0	0	0	0	0	0	169.4	86.9	102	104	30.3	1	125	75	23.41	26.939	1	162.8	1	0	1		5.3	6	0.09
1346	2	55.4932	4.62	14.2	261	4.5	1.3	53	21	14	13	243	156	73	72	14	0.78	88	0	0	0	0	0	0	0	0	0	0	154.1	65.6	87	103	27.6	1	103	84	16.32	24.878	0	101	1	0	1		5.6	5	0.03
1347	2	45.1507	9.12	14.5	417	4.6	0.7	63	19	19	20	206	117	127	64	11	0.7	86	1	0	0	0	0	0	0	0	0	0	158.5	69.9	96	106	27.8	1	92	62	17.39	24.8784	0	109.7	1	0	0		6	4.6	0.46
1348	2	57.5479	4.96	13.2	349	4.3	0.8	54	32	38	35	322	249	116	50	22	0.65	93	0	0	0	0	0	0	1	1	1	0	158.8	62.9	87	97	24.9	0	122	83	15.65	24.8808	0	133	1	0	0		5.8	6	0.09
1349	2	64.9342	5.58	14.2	290	4.3	1.4	72	23	15	12	155	70	116	62	14	0.88	98	0	0	0	1	1	0	1	1	1	0	141	43.8	75.5	84	22	0	103	77	10.9	24.8858	0	78.7	0	0	0		6	5.6	0.16
1350	2	59.2822	5.86	15.6	344	4.2	1	79	42	33	168	204	107	219	53	8	0.37	138	0	0	0	0	1	0	1	1	0	1	157	44.2	72	83.5	17.9	0	117	82	11	24.8869	0	64	0	0	1		6.5	5.9	0.06
1351	2	57.1836	5.7	12.9	323	4.2	0.8	49	26	21	13	206	113	54	82	19	0.75	99	0	0	0	0	0	0	0	0	0	0	152.5	49.9	77.5	92.5	21.3	0	92	69	12.42	24.8898	0	77.9	0	0	0		5.7	4.9	0.02
1352	2	74.2904	2.62	12.3	218	4.5	2.9	63	25	19	19	173	106	65	54	25	0.92	98	1	1	1	0	0	0	0	0	0	0	150.9	54.6	90	95	23.9	0	125	77	13.59	24.8901	0	100.8	1	0	0		5.7	6.2	0.05
1353	2	56.4712	4.99	12.7	267	4.4	0.3	72	17	15	12	250	151	264	46	15	0.61	113	0	0	0	0	0	1	1	1	1	1	152.9	51.5	84	88.5	22	0	116	78	12.82	24.8932	0	92	0	0	0		6	4	0.03
1354	2	55.9973	5.72	15	213	4.6	0.9	85	32	23	47	177	84	141	65	23	0.65	131	1	1	1	1	1	0	1	1	1	0	162.1	71.9	100.5	103	27.4	1	118	80	17.9	24.8957	0	151.6	1	0	0	15.1	6.9	3	0.06
1355	2	49.0027	6.3	11.8	224	4.3	0.8	52	28	26	24	203	123	97	61	16	0.67	92	1	0	0	0	0	0	0	0	0	0	166	77.1	90	99	28	1	115	79	19.2	24.9027	0	119	1	0	0		5.7	6.8	0.24
1356	2	56.2493	6.1	12.9	240	4.2	0.7	55	26	19	10	186	108	52	68	18	0.56	88	0	0	0	0	0	0	0	0	0	0	156.4	57.1	81	94	23.3	0	110	82	14.22	24.9037	0	98.9	0	0	1		5.8	3.3	0.25
1357	2	53.0438	3.57	14.1	222	4.2	1.2	69	19	19	18	242	156	46	77	11	0.62	90	1	0	1	0	0	0	0	0	0	0	158.4	73.6	94	101	29.3	1	136	102	18.33	24.9049	0	128.2	1	0	1		5.2	4.6	0.03
1358	2	37.3014	8.13	12.9	294	4.1	0.8	56	15	11	12	192	120	137	45	11	0.54	94	0	0	0	0	0	1	0	1	0	0	163.7	69.3	87	101	25.8	1	104	75	17.26	24.9062	0	86.7	0	0	0		5.4	4.3	0.67
1359	2	78.0082	7.48	12	440	4.1	0.7	63	20	11	11	159	111	58	36	21	0.65	90	0	0	1	0	0	1	0	1	0	0	144	43	68	85	20.7	0	121	90	10.71	24.907	0	70.8	0	0	0		6.1	4.2	0.57
1360	2	52.0904	3.39	12.7	226	4.2	0.7	105	48	55	72	131	65	113	43	18	0.38	88	0	0	0	0	0	1	0	1	0	0	150.2	50.1	80	92	22.2	0	123	86	12.48	24.9102	0	71.4	0	0	0		5.8	6	0.48
1361	1	50.2411	9.14	14.9	266	4.6	0.8	78	28	38	41	103	41	116	39	17	0.8	96	0	0	0	0	0	1	0	1	0	0	156.8	56.1	79	83	22.8	0	101	76	15.13	26.9697	1	114.1	1	0	0		6.1	5.5	0.02
1362	1	56.211	4.92	14.9	266	4.3	1.6	67	20	19	15	234	165	113	46	9	0.79	103	0	0	0	0	0	0	0	0	0	0	170.8	77.9	101	104	26.7	1	115	77	21.01	26.9705	1	134.2	1	0	1		5.3	5.5	0.07
1363	2	62.2137	6.02	13.6	232	4	1.1	77	39	44	15	130	61	126	44	14	0.74	97	1	0	0	0	0	1	1	1	1	0	159.8	68	92	98	26.6	1	123	86	16.94	24.9118	0	112.8	1	0	1		5.6	4	0.06
1364	2	48.0548	6.03	10.5	570	4.2	1.3	89	21	16	24	130	75	53	44	8	0.54	109	1	0	1	0	0	1	0	1	0	0	156.6	62.7	90	97	25.6	1	122	93	15.62	24.9123	0	96.6	0	0	0		6.2	3.8	0.22
1365	2	49.1507	4.95	14.3	265	4	1.1	71	26	27	15	201	134	59	55	18	0.63	81	0	0	0	0	0	0	0	0	0	0	159.6	59	77	94	23	0	96	68	14.7	24.9153	0	93.4	0	0	0		5.1	4.2	0.19
1366	2	54.4274	5.36	12.3	264	4.3	0.8	90	28	20	18	187	116	79	55	8	0.57	89	0	0	0	0	0	0	0	0	0	0	154.5	49	82	89	20.5	0	97	60	12.21	24.9184	0	63.7	0	0	0		5.6	3.6	0.02
1367	2	34.1479	5	9.6	454	3.9	0.4	70	16	9	12	148	95	75	38	14	0.66	89	0	0	0	0	0	1	0	1	0	0	162.5	68.5	86	107	25.9	1	106	81	17.07	24.9197	0	78.3	0	0	0		5.8	4.4	0.24
1368	2	58.9041	4.34	14.3	223	4.2	0.9	79	28	18	35	151	89	38	54	17	0.71	90	0	0	1	0	0	0	1	1	1	0	150	45.3	69	88	20.1	0	119	90	11.29	24.9227	0	83.6	0	0	0		5.8	4.1	0.05
1369	2	38.1589	7.49	14.4	386	4.1	0.7	45	15	11	15	185	114	97	52	10	0.59	89	1	0	0	0	0	0	0	0	0	0	157.3	71.3	95	103	28.8	1	97	65	17.77	24.9229	0	110.7	1	1	1		5.5	3.8	0.12
1370	1	41.4685	3.93	15.5	273	4.1	0.5	42	24	26	22	177	100	190	39	10	0.88	90	1	0	0	0	0	1	1	1	0	1	173.5	100.8	116	112	33.5	1	120	75	27.19	26.9742	1	161.1	1	1	1		5.7	6.6	0.16
1371	2	56.6822	3.66	12.6	263	4.2	1	59	20	13	9	201	122	71	65	13	0.71	86	1	0	0	0	0	0	0	0	0	0	158.9	59.5	88	98	23.6	0	104	80	14.83	24.9244	0	111.8	1	0	0		5.6	3.9	0.02
1372	2	49.4986	4.64	12.8	313	4.1	1.6	54	38	58	25	181	105	99	56	12	0.62	92	1	0	0	0	0	0	0	0	0	0	158.9	70	89	101	27.7	1	111	72	17.45	24.9286	0	123.7	1	0	1		5.5	5.5	0.07
1373	1	50.789	5.35	14.8	302	4.5	0.8	95	27	34	16	218	144	87	57	20	0.99	88	0	0	1	0	0	0	0	0	0	0	153.7	69.1	90	94	29.1	1	129	93	18.64	26.9754	1	103.2	1	0	0		5.8	5.9	0.08
1374	2	56.0932	5.48	13.1	281	4.1	0.9	106	25	15	13	152	82	99	50	12	0.77	83	0	0	0	0	0	0	0	0	0	0	159.1	56.8	87	90	22.5	0	95	64	14.16	24.9296	0	85.9	0	0	0		5.5	4.7	0.07
1375	2	51.9288	4.55	13.4	252	4.5	1.1	72	24	13	10	204	119	91	67	10	0.81	95	1	0	0	0	0	0	0	0	0	0	156.7	64.7	90	102	26.3	1	132	89	16.13	24.9304	0	75.1	0	0	0		5.9	4	0.04
1376	2	59.3808	3.52	14.1	238	4.4	0.9	39	51	43	28	200	104	54	85	15	0.66	84	0	0	0	0	0	0	1	1	1	0	157.6	51.3	78	93	20.7	0	119	85	12.79	24.9318	0	59.1	0	0	0		5.4	4	0.1
1377	2	36.1288	3.57	12.9	225	4	0.7	46	18	8	9	173	95	67	65	12	0.63	84	1	0	0	0	0	0	0	0	0	0	161.1	67.9	92	100	26.2	1	106	82	16.93	24.9337	0	94.6	0	0	0	5.8	5.2	4.1	0.05
1378	2	55.5836	5.51	13.5	285	4.3	0.7	60	25	18	13	180	105	92	57	14	0.59	102	0	0	0	1	1	0	0	0	0	0	156.2	54.9	74	89	22.6	0	118	78	13.6915	24.9391	0	89.7768	0	0	0		6.4	2.4	0.08
1379	1	78.6822	7.6	17.6	235	4.5	2.5	51	38	43	39	203	128	55	64	17	0.88	107	0	1	1	0	0	0	0	0	0	0	154.1	54	87	92	22.7	0	134	87	14.57	26.9815	1	61	0	0	1		6.1	6.2	0.34
1380	2	66.3123	5.96	12.6	224	4.2	0.7	83	40	45	26	178	125	105	32	12	0.73	108	1	1	1	0	0	1	0	1	0	0	155.2	62.7	89	91	26.1	1	150	89	15.64	24.9442	0	93.6	0	0	0		5.1	5.2	0.3
1381	2	62.2247	3.59	14.1	260	4.1	1.1	73	26	34	17	165	90	96	56	7	0.62	96	0	1	1	0	0	0	0	0	0	0	155.1	55.4	77	90	23	0	133	87	13.82	24.9458	0	84.3	0	0	1		5.8	5	0.25
1382	2	52.8466	4.06	12.9	265	4.2	0.7	65	25	20	10	215	130	177	50	10	0.53	121	0	0	0	1	1	0	1	1	0	1	150.5	55.6	86	95	24.5	0	118	72	13.87	24.946	0	85.3	0	0	0		6.1	3.5	0.07
1383	2	40.7918	6.86	13.7	300	4	1.5	62	16	12	13	228	145	75	68	13	0.57	91	0	0	0	0	0	0	0	0	0	0	158.9	60.6	86	103	24	0	98	69	15.12	24.9505	0	70.6	0	0	1	10.9	5.7	4.6	0.11
1384	2	65.5123	4.19	14.4	285	4.1	0.8	114	44	32	16	177	104	98	53	12	0.64	92	1	0	0	0	0	0	1	1	1	0	156.7	61	95.5	90	24.7	0	121	65	15.22	24.9508	0	92.5	0	0	0		5.8	4.9	0.08
1385	2	56.9836	8.15	14.3	263	4.5	0.6	107	22	16	24	196	129	75	52	8	0.67	122	0	0	1	0	0	0	0	0	0	0	162.9	71.5	78.5	98.5	26.9	1	151	94	17.84	24.951	0	131	1	0	1		6	5.6	0.11
1386	1	65.726	6.17	15.9	211	4.1	0.8	68	33	31	47	204	137	106	46	16	0.94	93	1	1	1	0	0	0	0	0	0	0	168.5	83.7	109	109	29.5	1	119	89	22.59	26.9892	1	160.3	1	0	1		5.5	5.8	0.13
1387	2	35.9479	4.08	12.8	305	4.4	0.9	55	24	10	9	178	90	44	79	9	0.57	90	0	0	0	0	0	0	0	0	0	0	154.9	54.7	76	97	22.8	0	101	65	13.65	24.9543	0	54.7	0	0	1		5.2	4.4	0.03
1388	2	33.7699	4.79	13.9	345	4.5	1	75	27	16	9	214	124	48	80	9	0.64	79	0	0	0	0	0	0	0	0	0	0	151.1	45	71	88	19.7	0	97	72	11.23	24.9556	0	52.8	0	0	0		5	4.8	0.03
1389	2	46.7589	3.44	14.1	270	4.5	1.1	41	26	19	13	260	173	120	63	20	0.5	86	0	0	0	0	0	0	0	0	0	0	151.1	45.4	71	88	19.9	0	95	69	11.33	24.9559	0	74.8	0	0	1		5.3	3.7	0.05
1390	1	37.4767	6.35	16.9	238	4.6	1.2	52	42	53	117	247	166	210	39	12	1.04	91	0	0	1	0	0	1	1	1	0	1	165.5	75	93	97	27.4	1	127	95	20.25	27	1	152.6	1	1	1		5.4	7.2	0.16
1391	2	54.9096	5.96	14.8	290	4.4	1	63	36	50	43	202	112	115	67	9	0.74	118	1	0	1	0	0	0	0	0	0	0	165.5	79.9	102	103	29.2	1	136	91	19.94	24.9562	0	181	1	0	0		5.7	4.3	0.22
1392	2	58.6849	8.95	14	291	4.4	1	142	40	55	32	235	169	105	45	9	0.65	128	0	0	1	0	1	1	0	1	0	0	163.4	62.9	85	92	23.7	0	157	91	15.7	24.9603	0	124.7	1	0	0		6	4.2	0.36
1393	2	48.8712	5.14	12.5	253	4.2	1.8	75	26	20	7	239	148	53	80	9	0.6	91	1	0	0	0	0	0	0	0	0	0	168.5	77	95	105	27.1	1	116	83	19.22	24.961	0	151.5	1	0	1		5.1	3.4	0.02
1394	2	52.3699	4.64	14	179	4	0.6	85	30	36	82	177	112	111	43	9	0.55	95	0	0	0	0	0	1	0	1	0	0	154	51.8	84	89	21.8	0	112	81	12.93	24.9614	0	95.8	0	0	1		5.5	4.8	0.06
1395	2	64.3753	4.06	14.5	224	4.5	1.2	63	50	36	16	179	104	84	58	11	0.88	87	0	1	1	0	0	0	1	1	1	0	155.7	56.8	86	98	23.4	0	101	69	14.18	24.9648	0	90	0	0	1		5.6	4.4	0.02
1396	2	41.9151	10.42	14	270	4.1	0.6	49	30	30	21	188	81	318	43	9	0.48	100	0	0	0	0	0	1	1	1	0	1	154.8	58.4	79	96	24.4	0	101	68	14.58	24.9658	0	98.6	0	0	0		5.2	5	0.12
1397	2	61.2658	4.2	13.9	284	4.5	0.9	93	23	18	29	213	140	70	59	14	0.56	88	1	0	0	0	0	0	0	0	0	0	159.9	60	89	94.5	23.4	0	133	79	14.98	24.9667	0	121.2	1	0	0		5.7	5.2	0.04
1398	2	48.0932	4.08	12.3	100	3.9	1	46	16	13	7	135	75	56	49	13	0.65	79	0	0	0	0	0	1	0	1	0	0	159.2	56	84	91	22.2	0	101	70	13.983	24.9696	0	94.1849	0	0	0		5.3	3.8	0.02
1399	2	57.8411	4.11	15	274	4.5	1.6	62	26	33	16	175	107	47	59	12	0.65	124	0	1	1	0	0	0	1	1	1	0	156.7	67.4	66	97	27.4	1	132	86	16.83	24.9703	0	95.7	0	0	1		6.2	5.3	0.04
1400	2	50.9534	5.24	14.9	283	4.4	0.9	100	17	15	17	213	146	77	52	12	0.72	116	1	1	1	0	0	0	0	0	0	0	163.7	72.4	89	105	27	1	119	91	18.08	24.9724	0	110.2	1	0	0	11.1	5.9	5.2	0.63
1401	2	67.1808	5.91	13.3	384	3.7	0.7	87	28	21	10	164	107	91	39	20	0.68	98	0	0	0	0	0	1	0	1	0	0	151.6	54.9	80	88.5	23.9	0	110	64	13.71	24.9727	0	87.1	0	0	0		5.4	4.9	0.12
1402	2	59.189	6.6	13.9	300	4.6	1.4	63	18	16	16	206	130	85	59	19	0.66	93	0	0	0	0	0	0	0	0	0	0	160.9	59.9	80	95	23.1	0	116	83	14.96	24.975	0	101.2	1	0	1		5.5	5	0.13
1403	2	37.8932	4.55	13.3	236	4.1	0.9	61	13	8	10	188	105	49	73	7	0.68	76	0	0	0	0	0	0	0	0	0	0	155.6	60.7	80	99	25.1	1	99	64	15.16	24.9753	0	87.9	0	0	0		5.2	3.9	0.05
1404	2	52.611	4.78	13.2	153	4.2	0.7	71	118	111	16	212	138	138	46	19	0.76	96	0	0	1	0	0	1	0	1	0	0	158.8	64.5	81	101	25.5	1	134	105	16.11	24.9767	0	70.9	0	0	0		5.9	3.6	0.05
1405	2	84.3973	7.32	12.8	187	4.1	1.3	61	45	37	48	157	72	223	40	11	0.64	101	1	1	1	1	1	1	1	1	0	1	155	56	89	99	23.3	0	119	69	13.99	24.9821	0	98	0	0	0		5.9	5.7	0.14
1406	2	74.5123	3.98	11.5	159	4	1.6	82	44	47	15	89	37	66	39	12	0.72	115	1	0	0	1	1	1	1	1	1	0	152.6	65.6	100	105.5	28	1	113	76	16.39	24.9848	0	104.6	1	0	0		6.4	3.4	0.08
1407	2	33.9863	5.79	13.9	365	4.6	0.9	52	16	15	16	198	130	109	46	12	0.64	115	1	0	0	0	0	1	0	1	0	0	166.8	68.6	91	100	24.7	0	110	83	17.14	24.9854	0	81.7	0	0	1		5.4	5.9	0.06
1408	2	35.9315	3.74	14.1	225	4.1	1.5	38	18	10	10	209	117	66	79	7	0.54	80	0	0	0	0	0	0	0	0	0	0	156.7	47.5	67	91	19.3	0	97	65	11.87	24.9895	0	66.7	0	0	0		5.1	4.3	0.02
1409	2	41.1233	3.71	13.1	198	4.2	1.2	51	16	10	16	184	99	69	71	10	0.61	86	0	0	0	0	0	0	0	0	0	0	155.5	53.9	81	90	22.1	0	100	75	13.47	24.9907	0	78.8	0	0	1		5.1	3.7	0.03
1410	1	66.2356	4.87	17	274	4.6	1.1	66	41	51	118	157	87	59	58	11	0.71	103	0	0	1	0	0	0	1	1	1	0	153.8	58.6	87	91	24.8	0	144	89	15.83	27.0137	1	115.4	1	0	1		5.6	7.3	0.07
1411	2	53.8849	4.43	14.6	230	4.2	1.5	75	27	34	43	250	172	117	55	21	0.99	83	0	0	0	0	0	0	0	0	0	0	152.7	53.9	83	92	23	0	113	89	13.47	24.9907	0	81.9	0	0	0		5.4	4.9	0.08
1412	2	52.389	6.15	13.1	272	4.4	0.6	54	20	10	12	185	116	63	56	10	0.55	89	0	0	0	0	0	0	1	1	1	0	151.5	54.3	78	88	23.7	0	126	79	13.57	24.9908	0	79.2	0	0	0		6	4	0.6
1413	2	53.8274	4.3	13.6	235	4.2	0.9	89	32	23	29	246	139	83	90	11	0.65	88	0	0	0	0	0	0	0	0	0	0	159.5	56.7	80	101	22.3	0	80	52	14.17	24.9912	0	98.2	0	0	0		5.3	4.3	0.08
1414	2	46.6877	4.06	11.5	371	4.4	0.9	72	19	11	7	200	121	52	69	6	0.54	81	0	0	0	0	0	0	0	0	0	0	160.4	57.3	76	93	22.4	0	110	71	14.32	24.9913	0	83.4	0	0	0		5.8	3.3	0.08
1415	1	60.4356	5.59	14.7	205	4.8	0.7	71	30	31	27	236	140	102	76	15	0.84	97	1	0	1	0	0	0	0	0	0	0	155.9	78.2	102	105	32.2	1	146	77	21.13	27.0205	1	131.5	1	1	0		5.8	5	0.13
1416	2	26.7781	4.38	12.6	208	4.4	0.6	44	16	9	10	220	145	51	65	14	0.5	88	0	0	0	0	0	0	0	0	0	0	158	51.2	71	101	20.5	0	102	75	12.8	25	0	38.3	0	0	1		5.2	4.8	0.06
1417	2	48.2082	4.78	10.3	173	4.5	0.6	38	26	13	14	218	127	77	76	10	0.75	100	0	0	0	0	0	0	1	1	1	0	151.2	50.4	68	93	22	0	119	80	12.6	25	0	54.9	0	0	0		5.6	3.3	0.02
1418	2	60.2849	3.38	13.4	209	4.2	0.8	78	23	20	10	264	179	155	54	16	0.7	97	0	0	0	0	0	0	1	1	1	1	150.8	55.2	82	91	24.3	0	124	88	13.8	25	0	74.6	0	0	0		6	5.4	0.08
1419	1	65.3589	5.52	14.8	189	4.3	1	73	25	26	15	135	82	109	31	10	0.87	90	1	1	1	0	0	1	0	1	0	0	166.3	85.4	107	110	30.9	1	118	79	23.08	27.0258	1	149.2	1	1	0		5.6	7.1	0.22
1420	2	52.3808	4.52	13.7	308	4.4	0.6	87	28	20	15	220	136	48	74	16	0.69	94	1	0	1	0	0	0	0	0	0	0	154.5	62.4	88.5	97	26	1	136	90	15.6	25	0	84	0	0	1		5.8	6	0.25
1421	2	26.7068	4.86	14.5	285	4.3	0.9	51	13	7	10	206	118	58	76	7	0.68	82	0	0	0	0	0	0	0	0	0	0	154	58.8	80	99	24.8	0	100	63	14.7	25	0	92.3	0	0	1		5.1	4.7	0.03
1422	2	78.3918	6.23	13	212	3.7	0.7	49	17	7	16	276	194	108	60	16	0.87	93	1	0	1	0	0	0	1	1	1	0	160	62.2	88	94.5	24.3	0	142	79	15.55	25	0	92.7	0	0	0		5.4	7	0.05
1423	1	33.7397	7.5	16.1	286	4.3	1.2	84	47	94	58	197	122	175	40	8	0.84	85	0	0	0	0	0	0	1	1	0	1	171.2	84.1	100	104	28.7	1	118	86	22.74	27.0392	1	141.9	1	0	1		5.8	6.4	0.24
1424	2	50.5945	5.8	14	275	4	0.9	49	16	16	14	209	110	117	76	9	0.48	81	0	0	0	0	0	0	0	0	0	0	156.6	61.6	84	90	25	1	100	60	15.4	25	0	96.7	0	0	1		5.4	5.9	0.06
1425	2	59.8247	5.44	13.1	282	4.4	0.6	81	25	24	11	154	97	63	44	9	0.53	92	0	0	0	1	1	1	1	1	1	0	156.6	56.8	84	92	23.2	0	106	71	14.2	25	0	105.3	1	0	0		6.5	5.5	1.06
1426	1	41.5699	8.84	15.8	256	4.8	1.4	83	27	41	81	173	88	215	42	14	1.07	117	1	1	1	0	0	0	1	1	1	1	171.6	97	109	110	32.7	1	140	103	26.23	27.0412	1	158.8	1	0	1		6	10.6	0.14
1427	2	53.4164	5.65	13	373	4.2	0.8	74	17	15	13	234	149	45	76	14	0.71	93	1	0	0	0	0	0	0	0	0	0	160	65.3	93	102	25.5	1	102	70	16.33	25.0077	0	88.9	0	0	1		5.7	5.2	0.03
1428	2	74.0466	5.19	11.7	312	4.3	0.8	96	36	8	58	175	114	43	52	16	0.76	94	0	1	1	0	0	0	0	0	0	0	152.2	49.7	82	86	21.5	0	139	67	12.43	25.0101	0	81.2	0	0	0		5.7	4.5	0.14
1429	2	65.6137	5.14	14.6	168	4.4	1.5	54	46	32	12	144	67	35	70	14	0.83	71	0	1	1	0	0	0	0	0	0	0	139.9	40.3	75	82	20.6	0	119	93	10.08	25.0124	0	48.3	0	0	0		5.2	4.9	0.02
1430	2	45.8548	5.45	12.2	262	4.3	0.5	48	18	19	12	203	124	156	48	10	0.5	106	0	0	0	0	0	1	1	1	0	1	157.4	58.2	82	94	23.6	0	87	63	14.56	25.0172	0	63.5	0	0	1		5.4	4.8	0.24
1431	2	52.3233	7.23	16	344	4.5	0.9	114	30	36	17	218	144	122	50	11	0.75	100	0	0	0	0	0	0	0	0	0	0	153.3	53.6	81	95	22.8	0	120	73	13.41	25.0187	0	66.9	0	0	1		5.5	3.3	0.05
1432	2	37.6822	6.83	11.4	316	4.1	0.6	43	18	14	20	179	54	294	66	13	0.58	76	1	1	1	0	0	0	1	1	0	1	165.1	73.3	96	109	26.9	1	112	75	18.34	25.0205	0	92.5	0	0	0		5.5	3.3	0.36
1433	2	56.4822	2.76	12.6	272	4.7	1.1	75	23	16	16	177	117	46	51	17	0.7	92	1	0	0	0	0	0	0	0	0	0	158	65.9	88	99	26.4	1	110	77	16.49	25.0228	0	110.2	1	0	0		5.2	3.4	0.02
1434	1	39.7589	6.01	16.6	235	4.2	0.9	48	21	31	26	168	95	115	50	12	0.97	82	1	0	1	0	0	0	0	0	0	0	174.2	112.5	117	114	37.1	1	147	102	30.43	27.0489	1	211.7	1	0	0		5.3	8.6	0.24
1435	1	59.274	12.31	16.3	361	3.9	1.3	97	28	31	60	190	130	68	46	15	0.92	98	1	0	0	0	0	0	0	0	0	0	173.7	86.5	108	106	28.7	1	116	87	23.4	27.052	1	192.2	1	1	0		6	5.6	2.23
1436	1	32.2384	7.17	15.6	389	4.5	0.8	90	22	31	19	184	100	239	36	9	0.84	109	1	0	0	0	0	1	1	1	0	1	176.1	93.4	106	115	30.1	1	129	85	25.27	27.0557	1	147.9	1	0	0		5.6	5	0.17
1437	2	51.4356	7.33	13.9	323	4.4	0.9	58	21	25	15	242	180	60	50	11	0.74	102	0	0	0	0	0	0	0	0	0	0	158.3	64.5	87.5	103	25.8	1	134	89	16.14	25.0233	0	87.6	0	0	1		5.6	5.2	0.04
1438	2	53.3151	6.94	12.8	335	4.6	0.5	54	35	37	70	272	151	204	80	8	0.52	94	1	0	0	0	0	0	1	1	0	1	154.9	63.9	90	101	26.6	1	116	82	15.99	25.0235	0	71	0	1	1		5.6	6.2	0.24
1439	1	54.5315	6.45	15.8	276	4.8	1	56	35	46	27	159	87	90	54	18	0.9	105	0	1	1	0	0	0	0	0	0	0	163.8	70.5	92	95	26.3	1	120	82	19.08	27.0638	1	127.4	1	1	1		6.7	4.6	0.11
1440	2	31.1945	4.51	13.3	236	4	0.6	49	18	13	9	155	80	67	62	8	0.53	83	0	0	0	0	0	0	0	0	0	0	154.5	59.3	78	96	24.7	0	96	67	14.84	25.0253	0	44.8	0	0	1		4.9	3.7	0.02
1441	1	56.0137	5.54	14.1	303	4.8	0.8	71	51	52	38	130	64	95	47	19	0.93	95	0	1	1	0	0	0	1	1	1	0	162.7	74.2	97	101	28	1	118	72	20.09	27.0755	1	157.1	1	0	0		5.7	4.5	0.09
1442	2	68.674	6.33	13.4	324	4.2	1.1	41	29	16	8	168	103	56	54	15	0.64	75	0	0	0	0	0	0	0	0	0	0	148.2	37.8	54	78	17.2	0	111	63	9.46	25.0265	0	69.6	0	0	0		5.4	4.9	0.06
1443	2	50.2849	4.25	12.8	64	4.5	0.7	69	18	19	12	201	123	123	53	11	0.63	103	0	0	0	0	0	0	0	0	0	0	162.4	56.7	83	96	21.5	0	125	74	14.19	25.0265	0	96.5	0	0	0		5.8	3.4	0.03
1444	1	46.2877	3.8	14.9	263	4.3	1	61	22	20	28	229	133	138	68	13	1.01	89	0	0	0	0	0	0	0	0	0	0	162.8	78.1	97	106	29.5	1	120	88	21.15	27.0807	1	97.3	0	0	1		5.4	6	0.25
1445	2	58.137	6.76	14.3	263	4.1	0.8	58	29	42	71	288	177	258	59	14	0.8	124	1	0	1	0	0	0	1	1	0	1	155.6	69.8	91.5	97.5	28.7	1	136	97	17.47	25.0287	0	129.5	1	0	1		6.4	5.6	0.09
1446	1	52.5945	6.84	15.9	304	4.2	1.4	61	29	32	19	201	150	50	41	12	0.83	80	0	0	0	0	0	0	0	0	0	0	161.3	87.7	99.5	103	33.8	1	129	75	23.75	27.081	1	131.4	1	0	1		5.2	6.7	0.05
1447	1	58.1342	10.5	17.8	229	4.4	1.3	105	27	27	66	274	196	123	53	13	0.98	99	0	0	0	0	0	0	0	0	0	0	169	81.3	101	105	28.5	1	104	73	22.02	27.0849	1	165	1	1	1		5.9	6.4	0.6
1448	2	51.0055	4.1	12.6	282	4.2	0.9	62	29	21	18	229	153	31	70	12	0.6	92	0	0	0	0	0	0	0	0	0	0	151.4	51.1	78	96	22.3	0	103	70	12.79	25.0294	0	46.9	0	0	1		5.7	4.4	0.11
1449	2	48.4493	5.16	14	290	4.7	0.8	70	20	15	15	255	168	94	68	16	0.64	122	0	0	1	0	0	0	0	0	0	0	149	56.3	81	92	25.4	1	131	95	14.0924	25.031	0	75.3555	0	0	0		6	3.1	0.07
1450	2	38.2877	5.5	7.9	472	4.7	1	55	35	38	22	164	100	85	47	8	0.64	130	1	0	1	0	1	1	0	1	0	0	158.1	78.5	89	106	31.4	1	156	107	19.65	25.0318	0	106	1	0	1		6.2	5.6	0.08
1451	2	54.4055	5.27	12.9	247	4.3	0.7	77	34	30	11	162	93	71	55	13	0.76	93	0	0	0	0	0	0	0	0	0	0	154.6	58.6	80	92	24.5	0	86	65	14.67	25.0341	0	61.2	0	0	0		5.9	4.7	0.08
1452	2	59.3726	6.31	12.8	259	4.3	0.9	79	29	17	31	216	130	53	75	13	0.55	91	0	0	0	0	0	0	1	1	1	0	153.1	58.4	80	92	24.9	0	96	66	14.62	25.0342	0	94.6	0	0	1		5.7	5.6	0.22
1453	2	30.9425	7.75	14	334	4.3	0.5	53	18	25	26	189	77	131	86	8	0.55	86	0	0	0	0	0	0	0	0	0	0	162.2	55.8	85	100	21.2	0	115	80	13.97	25.0358	0	68.5	0	0	0		5.1	3.7	0.47
1454	2	55.8356	3.88	12.5	304	4	1	77	19	14	11	185	113	49	62	13	0.67	97	1	0	0	0	0	0	0	0	0	0	153.7	63.1	89	97	26.6	1	128	83	15.8	25.0396	0	66.3	0	0	0		6.4	6.1	0.02
1455	2	26.7178	4.46	12.9	265	4.3	0.6	42	16	12	10	171	102	94	50	9	0.53	94	1	0	0	0	0	0	0	0	0	0	167.2	85.7	93	116	30.7	1	119	80	21.46	25.0408	0	113.4	1	0	0		5.2	3.1	0.2
1456	1	55.9562	7.75	15.9	141	3.8	1.2	103	54	30	100	126	64	50	52	16	0.98	127	0	1	1	1	1	0	1	1	1	0	164.5	76.5	93	100	28.1	1	128	84	20.72	27.085	1	114.7	1	0	1		6.7	8.2	0.28
1457	1	71.1315	5.04	15.9	164	4.1	1.5	57	30	54	27	161	97	114	41	9	0.79	88	0	1	1	0	0	0	1	1	1	0	162.4	75.8	96	105	28.7	1	120	75	20.55	27.1108	1	145.8	1	0	0		5.6	5.6	0.08
1458	2	42.2466	5.75	14.2	270	4.6	0.9	57	16	13	10	235	171	49	54	11	0.74	91	1	0	1	0	0	0	0	0	0	0	163.3	70	91	98	26.3	1	144	99	17.53	25.0429	0	90.5	0	0	0		6.2	5.8	0.04
1459	2	36.1781	4.59	14.9	310	4.5	0.7	55	47	75	44	275	197	168	44	11	0.72	112	0	0	0	0	0	1	1	1	0	1	154	58.1	81	95	24.5	0	121	80	14.55	25.043	0	86.2	0	0	0		5.7	5.6	0.14
1460	2	32.6247	7.61	13.1	294	4.4	1.2	62	28	36	21	210	132	170	44	9	0.64	93	1	0	0	0	0	1	1	1	0	1	159.5	69	90	100	27.1	1	102	75	17.28	25.0435	0	96.6	0	1	0		5.1	4.4	0.09
1461	2	61.9671	5.99	15.4	249	4.5	1	79	39	38	13	203	125	34	71	21	0.72	98	0	1	1	0	0	0	0	0	0	0	154.7	55.3	80	91	23.1	0	132	99	13.85	25.0452	0	93.9	0	0	1		5.2	5.8	0.03
1462	2	58.4603	7.56	11.1	442	4.1	0.7	105	23	22	8	203	115	33	81	21	0.66	66	0	0	0	1	1	0	0	0	0	0	156.1	54.1	83.5	89	22.2	0	128	62	13.55	25.0462	0	96.2	0	0	0		7	3.2	0.32
1463	2	69.6027	5.89	12.7	341	4.1	1.2	85	48	38	22	134	73	101	41	14	0.61	152	0	1	1	1	1	1	1	1	1	0	152.4	52.7	82	90	22.7	0	125	67	13.2	25.0474	0	94.2	0	0	0		7.5	3	0.06
1464	2	42.4027	8.7	14	334	4.5	0.7	75	24	36	32	248	168	175	45	9	0.64	94	0	0	0	0	0	1	1	1	0	1	151.1	51.9	78	86	22.8	0	117	86	13	25.0482	0	63.9	0	0	0		5.9	5.1	0.09
1465	2	59.4521	6.45	15	220	4.3	0.7	59	21	20	19	142	70	48	62	10	0.51	157	0	0	0	1	1	0	0	0	0	0	151.8	61.2	86	97	26.6	1	106	75	15.33	25.049	0	144.9	1	0	1		8.7	3.8	0.07
1466	2	71.4411	3.91	11.6	230	4	0.9	57	23	11	7	157	82	32	69	26	0.95	80	1	1	1	0	0	0	1	1	1	0	154.5	58.4	89	100	24.5	0	108	74	14.63	25.0514	0	79	0	0	0		5.4	6.1	0.03
1467	2	33.3616	7.02	11.6	310	4.2	0.6	58	19	20	16	204	114	60	78	10	0.5	75	1	0	0	0	0	0	0	0	0	0	161	63.5	93	105	24.5	0	107	74	15.91	25.0551	0	87.1	0	0	1		5.4	4.3	0.51
1468	2	33.4685	6.08	12.6	368	4.2	0.9	60	22	17	9	144	75	58	57	9	0.69	83	0	0	0	0	0	0	0	0	0	0	156.8	62.7	76	97.5	25.5	1	118	79	15.71	25.0558	0	66.4	0	0	1		4.8	4.6	0.12
1469	2	19.9342	6.74	12.5	266	4.2	0.9	54	20	14	10	163	86	84	60	13	0.53	77	0	0	0	0	0	0	0	0	0	0	160.4	61.3	74.5	104	23.9	0	104	74	15.36	25.0571	0	81.8	0	0	0		5.2	3.8	0.09
1470	2	56.326	4.38	14.1	183	4.4	1.1	81	21	20	13	190	110	72	66	12	0.68	77	0	0	1	0	0	0	1	1	1	0	154	60.1	75	95	25.3	1	149	103	15.06	25.0582	0	94.7	0	0	0		5.3	5.1	0.04
1471	1	76.326	7.27	15.4	153	4.5	1.2	68	38	26	19	196	114	96	63	22	1.07	87	0	1	1	0	0	0	1	1	1	0	162.6	59.5	86	88	22.4	0	129	79	16.14	27.1261	1	90.8	0	0	1		5.7	6.8	0.09
1472	2	63.4027	6.13	14.7	228	4.3	0.8	74	24	25	32	243	146	271	43	19	0.65	86	0	0	0	0	0	1	1	1	0	1	156.5	50.8	87	90	20.7	0	101	72	12.73	25.0591	0	66.1	0	1	0		5.5	5.1	0.05
1473	2	42.6548	6.66	13	193	4.1	0.7	56	22	25	21	162		427	30	14	0.73	118	1	0	0	0	0	1	1	1	1	1	164.9	89.9	101	111	33	1	115	75	22.53	25.0612	0	127.3	1	0	0		5.9	7.1	0.07
1474	2	64.5699	9.16	12.8	269	4.4	0.6	96	32	35	21	165	97	89	50	13	0.66	92	1	0	0	0	0	0	1	1	1	0	154.1	64	89	99	27	1	97	74	16.04	25.0625	0	119.2	1	0	0		6.1	4.2	0.46
1475	2	37.6438	6.13	12.2	332	4.5	1.1	62	16	14	15	242	158	114	61	10	0.67	108	1	0	1	0	0	0	0	0	0	0	165.3	75.4	92	108	27.6	1	126	93	18.9	25.0663	0	107.6	1	0	1		5.4	5.5	0.09
1476	2	52.1616	4.36	13.8	124	4.1	0.6	51	19	12	26	202	107	75	80	14	0.68	80	0	0	0	0	0	0	0	0	0	0	155.7	56	85	96	23	0	106	75	14.04	25.0714	0	55.6	0	0	1		5.2	5.1	0.04
1477	2	56.8247	4.88	12.5	258	4.1	0.6	45	30	29	13	215	115	100	80	12	0.63	85	0	1	1	0	0	0	0	0	0	0	154.3	53.6	81	93.5	22.6	0	117	82	13.44	25.0746	0	97.6	0	0	0		6	4.4	0.02
1478	2	52.2658	4.64	16.4	261	4.6	0.9	58	39	45	31	239	188	84	34	14	0.81	81	0	0	0	0	0	1	0	1	0	0	149.5	52.8	82	95	23.6	0	92	69	13.24	25.0758	0	88	0	0	0		5.2	5.2	0.18
1479	2	49.9425	5.85	12.4	324	4.3	1	60	21	14	12	181	95	92	68	8	0.57	95	0	0	0	0	0	0	0	0	0	0	157	51.8	80	95	21	0	89	61	12.99	25.0772	0	73.6	0	0	1		5.4	3.7	0.06
1480	2	74.6795	6.6	13.4	192	4.3	0.8	79	23	16	12	233	158	95	56	14	0.66	85	1	0	1	0	0	0	0	0	0	0	155	57.3	92	93	23.9	0	143	83	14.37	25.0785	0	90.1	0	0	0		5.7	4.2	0.05
1481	2	58.2712	7.36	13.4	330	4.1	0.4	73	17	16	38	129	58	161	39	8	0.61	111	0	1	1	1	1	1	1	1	1	1	157.3	57.3	85	89.5	23.2	0	126	83	14.37	25.0785	0	101.1	1	0	0		6.6	5	0.15
1482	1	28.2548	5.04	16.4	329	4.5	0.5	59	34	33	29	234	163	78	55	19	0.92	99	1	0	0	0	0	0	1	1	1	0	171.6	98.2	110	115	33.3	1	128	84	26.65	27.1385	1	182.5	1	0	1		5.5	5.2	0.07
1483	2	53.2493	5.99	13.7	160	4.5	0.6	61	29	31	84	193	54	259	87	17	0.59	112	0	0	0	0	0	0	1	1	0	1	155.9	53.7	71	88	22.1	0	98	81	13.47	25.0838	0	119.4	1	1	0		6.1	4.1	0.09
1484	1	59.2329	4.76	15.2	380	4.6	0.7	58	41	15	188	196	121	90	57	13	0.95	135	0	1	1	0	1	0	1	1	1	0	168.7	75.4	92	100	26.5	1	124	77	20.47	27.1485	1	150.2	1	0	1		6.6	5.9	0.16
1485	2	45.4466	7.47	14.1	238	4.4	0.8	60	17	14	24	233	146	235	40	11	0.58	145	1	0	0	0	1	1	1	1	0	1	157.6	63.5	88	97	25.6	1	98	71	15.93	25.0866	0	102.5	1	1	0		8	3.8	0.13
1486	2	65.2411	6.94	13.1	262	4	0.7	61	21	28	20	179	110	96	50	11	0.61	93	1	0	1	0	0	0	0	0	0	0	152.9	68.4	91.5	99.5	29.9	1	135	98	17.16	25.0877	0	108.5	1	0	0		5.3	3	0.84
1487	1	45.5918	4.33	15.1	307	4.4	1	74	29	45	31	212	146	65	53	10	0.74	90	0	0	0	0	0	0	0	0	0	0	160.2	74.1	97	100	28.9	1	130	89	20.12	27.1525	1	120.9	1	0	0		5.3	4.4	0.05
1488	2	29.5589	5.76	13.1	297	4.7	1.3	70	24	25	12	164	100	54	53	8	0.57	88	0	0	0	0	0	0	0	0	0	0	162.6	55.6	74	89	21	0	92	62	13.95	25.0899	0	83.3	0	0	1		4.7	5.7	0.09
1489	2	43.411	3.87	13.2	222	4.5	1.3	58	27	21	22	183	99	81	68	7	0.7	88	0	0	0	0	0	0	0	0	0	0	158	59.9	75	97	24	0	117	83	15.03	25.0918	0	93.5	0	1	1		5	6.8	0.04
1490	1	28.2137	5.31	14.2	298	4.1	0.6	49	23	25	25	177	114	107	42	12	0.91	92	0	0	0	0	0	0	0	0	0	0	165.6	78.2	95	102	28.5	1	112	89	21.25	27.1739	1	91.2	0	1	1		5.5	6.8	0.06
1491	2	70.5836	6.11	13.9	298	4.3	1.7	87	31	21	19	212	110	119	78	14	0.61	102	0	0	0	0	0	0	1	1	1	0	148	43.4	75	87	19.8	0	134	72	10.89	25.0922	0	75.6	0	0	0		5.2	5.7	0.1
1492	2	60.4164	4.3	13.3	204	4.2	1	96	25	39	21	150	69	128	55	10	0.42	103	1	1	1	0	0	0	1	1	1	0	156.6	59.5	93	99	24.3	0	114	82	14.93	25.0924	0	82.5	0	0	0		5.8	5	0.08
1493	2	60.7178	4.14	12.7	164	4.4	1.2	77	21	19	13	201	130	35	64	22	0.74	85	0	0	0	0	0	0	0	0	0	0	153.8	56.7	85	92	23.9	0	109	71	14.2277	25.0929	0	88.2877	0	0	0		5.4	4.2	0.02
1494	2	52.5342	4.32	12.1	225	4.2	1.3	67	17	14	14	234	175	35	52	11	0.67	78	0	0	0	0	0	0	0	0	0	0	154.5	53	83	93	22.2	0	103	65	13.3	25.0943	0	78.5	0	0	0		5.9	4.3	0.06
1495	1	39.5726	7.23	15.2	388	4.8	1.1	82	48	88	82	239	148	282	35	17	1.04	100	0	0	0	0	0	1	1	1	0	1	164.1	73.7	100	98	27.4	1	102	80	20.03	27.1777	1	165.3	1	1	1		5.8	10.2	0.24
1496	2	69.3644	5.64	12.7	324	4.4	0.5	88	36	19	18	196		409	42	20	0.73	105	1	1	1	0	0	1	1	1	1	1	150.6	63	98.5	96.5	27.6	1	124	76	15.81	25.0952	0	106.9	1	0	0		6.1	5.8	0.17
1497	2	47.4575	3.82	13.5	144	4.4	0.7	63	18	13	17	187	93	49	84	15	0.57	87	0	0	0	0	0	0	0	0	0	0	159	51.6	81	90	20.4	0	93	43	12.95	25.0969	0	65.3	0	0	0		5.4	3.3	0.03
1498	2	57.0027	6.62	13.9	258	4.2	1	64	24	20	11	199	101	93	79	10	0.72	97	0	0	0	0	0	0	0	0	0	0	148.5	56.1	82	101	25.4	1	116	70	14.08	25.098	0	69.6	0	0	0		5.3	4	0.15
1499	2	65.5096	5.79	14.4	253	3.9	0.9	89	24	16	15	312	234	94	59	14	0.72	89	1	0	0	0	0	0	1	1	1	0	155.1	69	92	98	28.7	1	115	80	17.32	25.1014	0	105	1	0	0		5.4	4.3	0.1
1500	1	55.126	6.12	15.9	166	4.2	0.6	63	30	51	72	155		730	32	18	0.95	290	1	1	1	1	1	1	1	1	0	1	169.8	103.9	115.5	110	36	1	145	103	28.24	27.18	1	184.4	1	0	1		8.8	6.6	0.08
1501	2	64.5288	3.33	12.2	171	4.3	2.5	77	29	16	7	245	170	48	65	18	0.7	78	1	0	0	0	0	0	0	0	0	0	160.3	62.1	92.5	95	24.3	0	105	74	15.59	25.1047	0	118.8	1	0	0		5.7	5.1	0.06
1502	2	78.6493	3.62	12.8	255	3.8	0.7	91	22	16	12	196	138	41	50	15	0.62	87	1	0	1	0	0	0	0	0	0	0	157.9	66.6	88	98	26.7	1	144	70	16.72	25.1051	0	105.6	1	0	0		5.4	3.9	0.14
1503	2	54.4164	9.99	13.5	392	4.3	0.9	76	20	24	17	139	75	112	42	11	0.6	139	0	1	1	1	1	1	1	1	1	0	153.5	61.1	82	92	26.1	1	141	86	15.34	25.1064	0	85.2	0	0	0		6.6	4.3	0.54
1504	1	70.274	7.37	15.8	202	4.8	1.2	78	30	35	19	206	153	92	35	16	0.98	131	0	0	1	1	1	1	0	1	0	0	158.8	64	91	93	25.4	1	143	87	17.4	27.1875	1	130.8	1	0	1		7.1	7	0.23
1505	2	50.9233	4.68	12.8	241	3.9	0.6	79	22	13	11	199	127	92	54	13	0.73	88	0	0	1	0	0	0	0	0	0	0	162.1	55.6	81	98	21.2	0	132	93	13.96	25.1079	0	80.7	0	0	0		5.8	4.7	0.08
1506	2	74.1616	8.8	13.9	276	4.2	1.1	41	20	18	12	162	90	91	54	14	0.72	95	0	1	1	0	0	0	1	1	1	0	154.2	50.5	78	96	21.2	0	146	80	12.68	25.1089	0	120	1	0	0		5.2	3.9	0.16
1507	2	57.4685	5.76	14.3	247	4.7	0.8	91	27	25	29	193	107	152	56	13	0.77	88	0	0	0	0	0	0	1	1	1	1	151.8	49.5	77.5	87.5	21.4	0	104	69	12.43	25.1111	0	66.4	0	0	0		5.9	4.7	0.08
1508	1	37.6192	12.39	15.8	349	4.4	1	63	57	114	59	226	144	246	33	13	1.12	103	0	0	1	0	0	1	1	1	0	1	167.6	90.8	101	107	32.2	1	140	97	24.71	27.2137	1	166.4	1	0	1		6.1	8.5	0.21
1509	2	23.3589	6.06	11.4	284	4.3	0.5	62	19	8	10	178	82	76	81	11	0.61	88	0	0	0	0	0	0	0	0	0	0	162.4	49.5	64	96	18.8	0	91	67	12.43	25.1111	0	67.9	0	0	0		5.1	3.2	0.03
1510	2	52.2384	4.18	12.6	250	4	0.9	54	19	14	11	261	188	92	55	10	0.7	97	0	0	0	0	0	0	0	0	0	0	157.3	62.8	80	99	25.4	1	104	74	15.77	25.1115	0	99.5	0	0	1		5.9	4.9	0.18
1511	1	51.5589	6.95	15	184	4.5	1.6	63	25	41	26	178	119	78	43	13	0.94	81	0	1	1	0	0	0	0	0	0	0	164.9	85.1	95	104	31.3	1	125	84	23.16	27.215	1	120.2	1	0	0		5.2	8.8	0.46
1512	2	37.5342	3.87	13.1	307	4.6	0.5	75	17	17	13	223	136	100	67	11	0.54	98	0	0	0	0	0	0	0	0	0	0	158	53.8	75	89	21.6	0	101	66	13.51	25.1115	0	77.5	0	0	1		5.2	6.5	0.02
1513	1	53.3315	5.58	15.7	301	4.4	1	104	23	18	41	223	136	117	64	13	0.97	94	0	0	0	0	0	0	1	1	1	0	174	84.2	78	92	21.2	0	103	73	22.93	27.2328	1	105.9	1	1	1		5.7	4	0.02
1514	1	66.0685	5.13	15	258	4.3	1.3	65	24	20	19	192	124	117	45	12	1.01	137	1	1	1	0	1	0	0	0	0	0	165.8	84.2	105	107	30.6	1	127	84	22.93	27.2328	1	145.2	1	0	1		6.1	5.4	0.23
1515	2	31.1699	7.3	13.6	286	4.2	1.1	46	17	14	12	162	89	79	57	9	0.54	86	0	0	0	0	0	0	0	0	0	0	159.7	61.8	81	102	24.2	0	101	70	15.52	25.1133	0	79.1	0	0	1		5	4.5	0.06
1516	2	37.7945	5.37	13.7	274	4.6	1.2	54	19	27	18	257	189	73	53	10	0.71	91	0	0	0	0	0	0	0	0	0	0	155	57.1	78	91	23.8	0	106	73	14.34	25.1138	0	89.7	0	0	0		5.7	5.9	0.19
1517	1	47.5452	7.94	16.2	245	4.2	1	61	108	92	80	184	112	139	44	15	0.75	112	0	0	0	0	0	0	0	0	0	0	164	81.5	101	99	30.3	1	126	86	22.2	27.2393	1	154.9	1	1	1		6	4.6	0.41
1518	2	55.5973	6.14	14.9	247	4.2	1	90	65	75	57	194	120	91	56	20	0.81	88	1	0	0	0	0	0	0	0	0	0	161.8	65.7	88	100	25.1	1	117	75	16.5	25.1142	0	100.1	1	0	0		5.7	4.6	0.08
1519	1	46.0411	8.36	15.4	216	4.3	1.8	69	20	19	53	205	123	108	60	12	0.64	93	0	0	1	0	0	0	0	0	0	0	158.9	63.2	87	93	25	1	141	104	17.22	27.2468	1	103.2	1	0	1		5.9	6.2	0.1
1520	2	53.7123	5.5	13	340	4.4	0.8	71	17	12	15	228	145	103	62	12	0.58	110	0	0	1	0	0	0	0	0	0	0	153.5	52.2	79	91	22.2	0	148	106	13.11	25.1149	0	63.6	0	0	0		5.8	3.8	0.02
1521	2	52.4082	5.44	13.6	196	4.4	0.8	59	24	23	37	233	144	91	71	18	0.68	113	0	0	0	0	0	0	1	1	1	0	159.9	65.1	84	101	25.5	1	110	80	16.35	25.1152	0	102.8	1	0	1	8.6	6	4.7	0.05
1522	1	29.8192	7.38	16.1	308	4.5	1.3	51	32	51	46	172	94	200	38	14	0.9	85	1	0	0	0	0	1	1	1	0	1	161.2	87.2	103.5	107	33.6	1	112	74	23.76	27.2477	1	134.8	1	0	1		5.5	7.2	0.08
1523	2	47.5479	6.86	14.9	301	4.4	0.6	55	19	9	9	175	109	85	49	8	0.74	84	0	0	0	0	0	1	0	1	0	0	152.6	60	76.5	96	25.6	1	118	69	15.07	25.1167	0	73	0	0	0		5.5	3.8	0.06
1524	2	32.6055	2.05	12	108	3.7	4.9	38	51	30	9	205	107	38	90	9	0.63	69	1	0	0	0	0	0	0	0	0	0	148.6	64.1	89	105	29	1	103	69	16.1	25.117	0	41.5	0	0	1		4.4	6.4	0.04
1525	2	57.2932	3.18	15	217	4.7	1.2	96	36	39	21	249	185	52	54	12	0.62	90	0	0	1	0	0	0	1	1	1	0	155.2	59.8	83	97	24.8	0	145	92	15.02	25.1171	0	95.3	0	0	0		5.4	4.4	0.15
1526	2	35.2082	4.1	12.6	326	4.1	0.7	64	27	24	16	229	130	88	81	7	0.71	87	0	0	0	0	0	0	0	0	0	0	151.9	54.9	82	95	23.8	0	107	73	13.79	25.1184	0	75.4	0	0	0		5	4.9	0.02
1527	2	59.8658	8.1	14.8	252	4.4	0.7	90	22	20	10	209	139	119	46	14	0.73	88	0	0	0	0	0	1	1	1	1	0	157.6	63.1	87	98	25.4	1	107	78	15.85	25.1189	0	71	0	0	0		5.5	5.4	0.09
1528	2	57.8822	6.3	12.9	259	4.4	0.7	72	25	15	10	215	136	91	61	15	0.68	90	0	0	0	0	0	0	0	0	0	0	154.5	54.3	67	89	22.7	0	96	71	13.64	25.1197	0	80.2	0	0	0		5.7	5.5	0.04
1529	1	41.274	6.34	15.7	225	4.4	1	60	25	30	28	184	100	209	42	15	1.41	93	1	1	1	0	0	0	1	1	0	1	184.5	131.9	125	123	38.7	1	153	99	35.94	27.2479	1	234.2	1	0	1		5	9.2	0.09
1530	2	67.5507	4.88	13.8	225	4.1	0.5	119	25	23	16	166	94	120	48	17	0.69	93	0	1	1	0	0	1	0	1	0	0	154.6	58.4	83	90.5	24.3	0	149	95	14.67	25.1199	0	93.6	0	0	0		6	4.6	0.07
1531	2	42.5644	4.66	13.7	258	4.4	0.8	46	17	11	9	197	133	80	48	8	0.68	95	0	0	1	0	0	1	0	1	0	0	154	50	72	87	21.1	0	113	90	12.56	25.12	0	48.9	0	0	0		5.4	4.7	0.02
1532	1	75.811	4.75	15.3	241	3.8	1.2	56	19	17	12	271	212	118	35	11	0.92	77	0	0	0	0	0	1	0	1	0	0	157	67.5	92	94	27.4	1	91	60	18.4	27.2593	1	151.9	1	0	0		5.3	5.7	0.56
1533	2	71.1589	4.33	13.4	269	4	0.9	88	18	15	11	173	105	67	55	10	0.56	193	0	0	0	1	1	0	0	0	0	0	155.8	61.7	84	99	25.4	1	118	61	15.5	25.1216	0	113.6	1	0	0		7.5	2.8	0.1
1534	2	40.8247	5.05	11.7	194	4.3	0.7	49	17	12	8	162	101	114	38	11	0.72	88	0	0	0	0	0	1	0	1	0	0	147.5	63.2	83	97	29	1	124	75	15.88	25.1266	0	99.8	0	0	0		5.5	4.2	0.12
1535	2	29.537	7.09	13.1	203	4.3	1.1	57	24	15	12	163	79	55	73	10	0.51	85	0	0	0	0	0	0	0	0	0	0	155.9	46.4	73	90	19.1	0	90	60	11.66	25.1293	0	63.6	0	0	1		4.9	3.2	0.04
1536	2	65.8192	3.29	12	227	4.2	1	66	22	21	15	213	148	76	50	20	0.77	118	0	1	1	1	1	0	1	1	1	0	152.9	53.8	72	93	23	0	118	67	13.52	25.1301	0	102.1	1	0	0		6.7	5.4	0.06
1537	1	68.8082	8.22	15.8	232	4.1	0.9	120	58	50	40	152	90	144	33	12	0.79	170	0	1	1	1	1	1	0	1	0	0	168.1	74.2	98.5	95	26.3	1	113	75	20.23	27.2642	1	131.2	1	1	0		8.5	5.3	0.78
1538	2	81.2849	8.58	13.6	290	4.5	0.8	88	19	12	9	188	126	85	45	23	0.79	111	0	1	1	0	0	1	0	1	0	0	152.5	51	81	86	21.8	0	127	69	12.82	25.1373	0	69.3	0	0	0		6.1	5	0.11
1539	2	59.1452	7.14	14.1	318	4.5	1	85	36	28	25	269	180	101	69	12	0.71	92	0	0	0	0	0	0	0	0	0	0	153.8	50.8	75	93	21.5	0	100	68	12.77	25.1378	0	74	0	0	1		5.5	5.4	0.14
1540	1	59.926	4.43	15.6	117	3.4	0.9	76	56	58	59	167	98	77	54	10	0.85	108	0	1	1	1	1	0	0	0	0	0	164.6	84.2	99	105	31.1	1	154	100	22.96	27.2684	1	169.4	1	0	0		6.4	5.9	0.16
1541	2	60.8548	6.72	13.4	305	4.5	0.8	80	27	37	38	163	92	77	56	13	0.63	117	0	1	1	0	0	0	0	0	0	0	153.8	57.6	85	95	24.4	0	140	91	14.48	25.1389	0	95	0	0	0		6.5	3.9	0.32
1542	2	46.3397	9.25	15.8	299	4.4	1.1	95	17	28	31	176	118	68	44	9	0.64	99	1	0	1	0	0	1	0	1	0	0	165.3	75.1	96	102	27.5	1	148	101	18.88	25.1398	0	126.1	1	0	0		5.8	5	0.3
1543	2	48.8767	4.43	13.3	382	4.3	1.3	68	24	12	52	164	70	54	83	12	0.59	87	0	0	1	0	0	0	0	0	0	0	153.6	49.6	66	87	21	0	143	92	12.47	25.1411	0	59.9	0	0	1		5	4.4	0.04
1544	2	48.3973	7.18	11.3	334	4.5	0.8	85	26	17	40	207	144	132	37	9	0.73	88	0	0	0	0	0	1	0	1	0	0	158.5	70.4	87	100	27.8	1	109	77	17.7	25.142	0	117.4	1	0	0		5.6	6.6	0.1
1545	2	51.1808	7.79	15.4	241	4.1	0.6	53	16	13	6	246	150	204	55	18	0.59	87	0	0	0	0	0	0	1	1	0	1	159.5	66.1	82	97.5	26	1	130	86	16.62	25.1437	0	99.9	0	0	0		5.4	5.2	0.07
1546	2	24.9315	10.01	13.5	297	4.3	1.2	105	48	72	62	223	163	112	38	10	0.66	124	1	0	0	0	0	1	0	1	0	0	160.7	72.5	94	101	28.1	1	113	73	18.23	25.1448	0	107.1	1	0	0		8	6	1.05
1547	2	39.0301	6.75	13.6	272	4.3	0.7	60	15	10	10	217	132	108	63	9	0.66	98	0	0	0	0	0	0	0	0	0	0	156.7	57.7	72	95	23.5	0	125	86	14.51	25.1473	0	100.2	1	0	1		5.4	5	0.33
1548	2	35.1781	4.94	12.9	223	4.1	0.8	44	16	9	6	141	74	50	57	8	0.59	89	0	0	0	0	0	0	0	0	0	0	151.1	43.5	60	82	19.1	0	107	81	10.94	25.1494	0	44.1	0	0	1		5.1	3.5	0.02
1549	2	42.0192	3.9	13.1	277	4.6	1.2	57	18	15	13	177	75	98	82	7	0.58	97	0	0	0	0	0	0	0	0	0	0	156.1	56.7	82	94	23.3	0	129	85	14.26	25.1499	0	79.5	0	0	1		5.2	4	0.02
1550	2	63.9726	3.97	12.8	233	4.2	0.7	82	28	32	16	197	131	99	46	16	0.61	93	1	0	0	0	0	1	0	1	0	0	152.8	56.1	89	95.5	24	0	102	75	14.11	25.1515	0	75.5	0	0	0		5.9	4.5	0.1
1551	2	68.6822	4.85	11.9	333	4.1	0.5	71	18	19	27	144	58	127	61	9	0.56	262	0	1	1	1	1	0	1	1	1	0	156.8	58.8	86	95	23.9	0	124	73	14.79	25.1531	0	112.3	1	0	0		9.5	2.3	0.06
1552	2	65.6137	5.59	14.2	245	4.3	0.7	77	29	41	17	201	114	177	52	12	0.63	122	1	0	1	0	0	0	1	1	1	1	151.7	64.6	88	101	28.1	1	148	84	16.25	25.1548	0	105.2	1	0	0		6.6	2.6	0.02
1553	2	60.7616	3.63	13.3	249	4.2	1.1	76	17	17	15	212	151	96	42	16	0.63	96	0	0	0	0	0	1	0	1	0	0	156.8	59.9	81	94	24.4	0	112	71	15.07	25.1586	0	86.7	0	0	0		6	3.8	0.13
1554	2	53.526	4.96	12.4	230	4	0.5	79	17	17	19	191	125	78	50	15	0.76	97	1	0	0	0	0	0	0	0	0	0	156.7	72.5	92	101	29.4	1	128	86	18.24	25.1586	0	121.3	1	0	0	11.3	5.6	3.8	0.23
1555	2	60.5342	5.85	15	63	4.6	1	105	25	19	14	206	143	43	54	16	0.73	99	0	0	0	0	0	0	0	0	0	0	157.8	59.3	85	94	23.8	0	102	81	14.92	25.1602	0	104.6	1	0	0		5.7	3.9	0.05
1556	2	57.9068	8.27	13.7	326	4.6	0.5	75	28	31	30	280	185	84	78	20	0.82	163	0	1	1	1	1	0	0	0	0	0	153.1	56	80	91	23.9	0	132	83	14.09	25.1607	0	98.8	0	0	0		7.8	5.9	0.03
1557	2	52.7753	6.11	14	327	4.2	1	89	21	23	20	199	108	132	65	11	0.63	92	0	0	0	0	0	0	0	0	0	0	156.4	58.9	85.5	95	24.2	0	118	77	14.82	25.1613	0	69.8	0	0	0		5.8	4.5	0.09
1558	2	27.0658	7.08	13.5	360	4.5	0.9	51	22	23	52	213	89	105	103	8	0.65	89	0	0	0	0	0	0	0	0	0	0	154.7	55.8	74	91	23.3	0	110	87	14.04	25.1613	0	82.6	0	1	1		4.9	3	0.04
1559	2	57.3014	5.2	12.5	211	4.3	1	53	27	21	11	223	142	110	59	12	0.74	81	0	0	0	0	0	0	1	1	1	0	153.4	48.6	74	86	20.8	0	107	72	12.2288	25.1621	0	74.1999	0	0	0		5.6	5.2	0.04
1560	2	40.8027	5	14.4	309	4.3	0.7	44	20	12	65	228	137	159	59	8	0.7	90	0	0	1	0	0	0	1	1	0	1	157.7	60.6	82	93.5	24.4	0	120	90	15.25	25.165	0	82.6	0	0	1		4.6	6.4	0.11
1561	2	45.4438	5.73	13.8	360	4.4	0.7	62	20	17	9	202	127	76	60	12	0.63	76	0	0	0	0	0	0	0	0	0	0	148.6	45.3	77	85	20.4	0	106	72	11.4	25.1656	0	44.4	0	0	0		5.8	3.8	0.03
1562	2	52.1014	8.88	15.3	298	4.9	0.7	79	26	26	25	244	167	102	57	9	0.71	86	1	0	0	0	0	0	0	0	0	0	161.2	62.7	88	97	24.1	0	115	84	15.78	25.1675	0	117.2	1	0	0		5.3	5.8	0.1
1563	2	51.4356	8.12	13.8	320	4	0.8	50	15	20	18	182	88	81	78	12	0.67	82	0	0	0	0	0	0	0	0	0	0	155.1	56.7	77	91	23.6	0	119	85	14.27	25.1675	0	126.1	1	1	1		5.2	4.4	0.26
1564	2	30.874	6.29	14	288	4.2	1.4	54	19	14	14	202	126	71	62	12	0.56	88	1	0	0	0	0	0	0	0	0	0	161.2	74.1	91	105	28.5	1	111	82	18.65	25.1687	0	120.8	1	0	1	14.2	5.3	5.4	0.13
1565	2	57.0219	6.09	13.2	258	4.3	0.7	64	28	30	10	167	92	124	50	10	0.76	91	1	0	0	0	0	0	1	1	1	0	158.2	70.6	95	100	28.3	1	131	78	17.77	25.17	0	155	1	0	0		6	3.9	0.02
1566	2	31.9425	8.05	12	314	4.1	0.9	60	17	15	11	196	109	146	58	7	0.61	89	1	0	0	0	0	0	0	0	0	0	168.6	78.5	93	113	27.6	1	103	75	19.76	25.172	0	108.1	1	0	0		5.5	4.2	0.16
1567	2	37.7589	8.16	14.2	273	3.9	0.8	68	15	9	10	202	137	59	53	8	0.49	63	0	0	0	0	0	0	0	0	0	0	160.7	63.8	81	102	24.7	0	123	78	16.06	25.1724	0	82.3	0	0	0		5.1	6.5	0.32
1568	2	38.8822	5.49	14.1	287	4.5	0.6	72	20	12	15	169	85	113	61	10	0.61	85	0	0	0	0	0	0	0	0	0	0	153.9	55.1	78	97	23.4	0	99	78	13.87	25.1724	0	89.8	0	0	0		5.3	4	0.05
1569	2	34.3425	7.57	15	331	4.7	1.7	61	25	25	65	229		506	41	10	0.71	99	1	0	0	0	0	1	1	1	0	1	171.2	77.1	99	102	26.3	1	107	70	19.41	25.1751	0	137.1	1	1	1		4.7	5.4	0.12
1570	2	52.5726	9.46	15	363	4.4	1	84	31	33	18	224	155	95	50	11	0.72	99	0	0	0	0	0	0	0	0	0	0	159.6	65.3	87	94	25.5	1	116	81	16.44	25.1761	0	121.2	1	0	0		6	5.5	0.41
1571	2	59.8493	5.33	13.2	216	4	0.6	126	17	23	11	163	97	144	37	13	0.59	89	1	0	0	0	0	1	0	1	0	0	160.7	73.2	92	100	28.3	1	110	79	18.43	25.1776	0	118.9	1	0	1		6	4.6	0.09
1572	2	62.2329	5.54	13.8	221	4.2	0.7	70	20	11	16	249	165	207	43	17	0.59	98	1	0	0	0	0	1	1	1	0	1	149.3	56	91	96	25.1	1	120	81	14.1	25.1786	0	102.6	1	0	0		5.8	5.2	0.12
1573	2	74.1507	5.78	12.5	175	4.5	0.4	41	20	16	10	127	68	71	45	17	0.51	111	0	1	1	0	0	1	1	1	1	0	154.4	56	83	94	23.5	0	122	80	14.1	25.1786	0	125.7	1	0	0		5.8	2.9	0.41
1574	2	52.7726	3.77	15.1	234	4.7	1.1	66	25	23	15	228	136	71	78	14	0.59	86	0	0	0	0	0	0	0	0	0	0	154.2	53.1	78	96	22.3	0	96	68	13.37	25.1789	0	85.7	0	0	1		5.2	3.3	0.03
1575	2	58.6932	3.18	13.9	191	4.2	1.1	56	34	31	25	173	99	69	60	15	0.76	87	1	0	0	0	0	0	0	0	0	0	154.6	67	91.5	97	28	1	123	74	16.87	25.1791	0	111.8	1	0	1		4.9	4.7	0.11
1576	2	47.5041	4.3	13.4	237	4.2	0.7	69	22	12	12	198	133	57	54	10	0.56	91	0	0	0	0	0	0	0	0	0	0	153.2	49.6	70	89	21.2	0	113	66	12.49	25.1815	0	77.9	0	0	0		5.1	4.7	0.04
1577	1	42.4493	7.17	14.5	343	4.5	0.9	63	25	40	18	203	124	134	52	12	0.66	98	0	1	1	0	0	0	0	0	0	0	172	88.3	97.5	107	29.8	1	118	77	24.09	27.282	1	158.8	1	1	1		5.5	3.3	0.03
1578	2	64.3589	6.61	13.3	288	4.2	0.9	85	21	21	17	104	46	48	48	10	0.59	138	0	1	1	1	1	1	1	1	1	0	152.1	55	82	93	23.8	0	127	69	13.85	25.1818	0	81.7	0	0	0		7.5	4	0.75
1579	2	52.4493	4.63	14.1	173	4.4	1.1	71	19	12	12	189	104	70	71	10	0.72	101	1	0	0	0	0	0	0	0	0	0	156.2	71.2	93.5	100	29.3	1	136	79	17.93	25.1826	0	137.8	1	0	0		5.4	5.7	0.06
1580	2	44	5.36	11.8	217	4.1	0.7	52	18	12	7	158	77	59	69	11	0.62	91	0	0	0	0	0	0	0	0	0	0	158.3	62.5	85.5	95	25	1	120	83	15.74	25.184	0	72.8	0	0	1		5.4	4.3	0.04
1581	2	54.3233	4.95	15.5	210	4.3	1	46	43	58	25	206	141	99	45	18	1.06	146	1	1	1	1	1	1	1	1	1	0	157.7	71.9	101	101	28.9	1	114	78	18.11	25.1878	0	114.6	1	1	0		7	6	0.09
1582	2	56.5644	5.75	13.2	199	4.2	0.7	98	21	9	10	266	177	169	55	10	0.52	97	0	0	0	0	0	0	1	1	1	1	154.2	44.7	72	83	18.8	0	119	77	11.26	25.1902	0	85.4	0	0	0		6.1	4.1	0.05
1583	1	79.8493	5.74	12.2	198	3.9	0.5	60	19	21	25	140	68	156	41	15	0.93	95	0	0	0	0	0	0	1	1	0	1	164.6	73.5	97.5	98	27	1	120	75	20.06	27.2925	1	131	1	0	0		5.8	5	0.05
1584	1	60.4685	5.2	14.9	252	3.8	1.8	63	23	32	42	196	124	132	46	13	1	102	1	0	1	0	0	0	1	1	1	0	169.2	82.4	104	102	28.9	1	147	93	22.49	27.2937	1	133.4	1	0	1		6.1	6.8	0.02
1585	2	27.6	3.46	12.4	254	4.1	0.6	38	18	14	7	246	153	48	83	11	0.48	85	0	0	0	0	0	0	0	0	0	0	160.6	56.8	80	98	22	0	112	55	14.31	25.1937	0	53.4	0	0	1		5.1	3.4	0.07
1586	2	48.737	6.25	13.5	340	4.1	1	85	35	20	213	182	91	126	66	11	0.58	107	1	0	0	0	0	0	0	0	0	0	159.1	62.5	96	94	24.7	0	136	85	15.75	25.2	0	88.9	0	1	1		4.8	4.5	0.02
1587	2	64.3507	5.51	14.3	320	4.1	1	63	20	19	14	198	130	105	47	10	0.53	93	0	0	0	0	0	1	0	1	0	0	157.5	57.5	84	94	23.2	0	131	76	14.49	25.2	0	104	1	0	0		5.8	5.1	0.09
1588	2	67.4904	4.5	12.9	305	4.1	0.6	77	24	17	20	144	68	82	60	14	0.77	93	0	0	0	0	0	0	0	0	0	0	153.3	47.3	80	87	20.1	0	116	79	11.92	25.2008	0	86.6	0	0	0		5.5	4.3	0.1
1589	2	20.811	7.28	15.3	348	4.2	0.8	58	18	12	17	185	105	109	58	12	0.68	75	0	0	0	0	0	0	0	0	0	0	158	67.1	87	109	26.9	1	102	71	16.91	25.2012	0	96.5	0	0	0		5.1	4.7	0.14
1590	1	39.4795	5.51	15.7	281	4.4	1.5	75	30	36	16	243	176	143	38	11	0.98	84	0	0	0	0	0	1	1	1	1	0	160.9	71.1	89	102	27.4	1	113	89	19.41	27.2996	1	75.8	0	0	0		5.5	6.9	0.11
1591	2	57.7178	3.85	13.6	225	4.6	2.2	82	22	21	22	125	56	59	57	16	0.51	148	0	0	0	1	1	0	0	0	0	0	150.9	44.6	78	88	19.6	0	108	80	11.24	25.2018	0	71.7	0	0	0		6.8	3	0.04
1592	1	44.7616	4.29	14.3	282	4.5	1.7	78	75	134	38	163	104	107	38	12	1.05	131	1	1	1	1	1	1	0	1	0	0	181	118.5	119	123	36.2	1	136	93	32.35	27.2996	1	220.4	1	1	0		6.9	3.8	0.04
1593	1	64.1808	5.43	15.6	157	4.5	0.5	53	37	36	19	204		436	50	11	0.84	161	0	0	0	1	1	0	1	1	0	1	165.7	70.2	94	97.5	25.6	1	135	87	19.17	27.3077	1	148.2	1	0	0		6.6	5.5	0.04
1594	2	40.1205	5.99	14.7	307	4.9	1.8	51	21	19	28	251	168	178	47	13	0.94	83	0	0	0	0	0	1	1	1	0	1	152.6	59.4	72	95	25.5	1	121	88	14.97	25.202	0	69.4	0	0	0		5.4	6.3	0.18
1595	2	59.9014	4.17	13.8	195	4.5	0.5	73	45	66	69	154	85	122	45	15	0.51	120	0	1	1	1	1	1	1	1	1	0	151.2	56.7	84	90	24.8	0	108	66	14.29	25.2028	0	51.9	0	0	0		7.5	3.4	0.13
1596	2	59.0219	5.77	14.2	225	4	0.8	84	70	64	14	169	86	178	47	14	0.94	95	0	1	1	0	0	1	1	1	0	1	151.7	59	86	94	25.5	1	112	82	14.87	25.2034	0	97.5	0	0	0		5.8	4.8	0.08
1597	2	56.0219	6.71	13.6	210	4.6	0.9	100	25	19	25	170	96	145	45	11	0.66	102	0	0	0	0	0	1	0	1	0	0	154.1	54	74	97	22.7	0	123	79	13.61	25.2037	0	87.6	0	0	0		5.5	4.9	0.13
1598	2	71.0712	5.71	12.7	248	3.8	0.7	67	16	12	10	166	97	100	49	11	0.66	104	0	0	0	0	0	1	0	1	0	0	151.4	56.3	80	96	24.6	0	106	69	14.19	25.2043	0	84.9	0	0	0		5.8	4.5	0.26
1599	2	49.5014	4.43	11.8	196	3.7	0.5	49	19	17	13	87	42	61	33	11	0.42	83	0	0	0	0	0	1	0	1	0	0	151.1	46.1	73	84	20.2	0	116	82	11.62	25.2061	0	44.3	0	0	0		5.2	4.5	1.27
1600	2	55.5342	5.22	14.3	232	4.7	0.9	104	20	18	16	197	126	55	60	17	0.69	103	0	0	0	0	0	0	0	0	0	0	153.7	55.7	82.5	92	23.6	0	118	87	14.04	25.2065	0	94.4	0	0	0		5.4	4.1	0.03
1601	2	64.5589	6.74	15.2	252	4.6	1.7	68	34	33	17	118	49	74	54	15	0.67	159	0	1	1	1	1	0	1	1	1	0	148.2	55.3	81	89	25.2	1	189	97	13.94	25.208	0	79.9	0	0	0	15.8	6.8	5.6	0.25
1602	2	56.6575	4.06	13.3	276	4.2	1	66	23	12	24	229	158	176	36	13	0.7	81	0	0	0	0	0	1	1	1	0	1	157.7	55.1	82	92	22.2	0	92	68	13.89	25.2087	0	91.7	0	0	0		5.5	4.1	0.63
1603	1	43.9288	9.03	16.9	218	4.3	0.8	60	30	36	68	206	123	156	52	16	0.99	160	1	1	1	0	1	0	1	1	0	1	174	104.5	107	110	34.5	1	143	100	28.54	27.311	1	204.6	1	0	1		7.5	6.2	0.3
1604	1	60.5205	6.72	17.2	209	4.5	2.8	63	37	38	33	223	151	105	51	16	0.94	98	1	1	1	0	0	0	0	0	0	0	170.9	97.1	105	110	33.2	1	127	89	26.52	27.312	1	244	1	0	0		5.8	6.7	0.06
1605	2	39.4493	8.55	15.7	452	4.9	0.8	82	18	10	18	191	114	85	60	19	0.55	123	0	0	0	0	0	0	0	0	0	0	162	54.9	81	98	20.9	0	109	79	13.84	25.2095	0	79.1	0	0	0		6.3	3.7	0.06
1606	2	67.3781	8.49	13.9	334	4.7	0.6	63	24	20	20	224	125	61	87	20	0.87	117	0	0	0	0	0	0	0	0	0	0	152.5	54.3	84	90	23.3	0	127	80	13.69	25.2118	0	97.2	0	0	0		6.5	6.3	0.24
1607	2	60.9726	4.36	12.7	224	4.2	0.6	148	25	37	15	240	155	47	76	14	0.81	72	0	0	0	0	0	0	0	0	0	0	151.5	54.8	80	89	23.8	0	114	82	13.817	25.2135	0	96.0431	0	0	0		5.9	5.3	0.09
1608	2	30.926	4.62	12.3	268	4.6	1.3	57	21	21	31	199	123	110	54	8	0.5	93	1	0	0	0	0	0	0	0	0	0	166.7	67.7	92.3	104.5	24.4	0	106	68	17.07	25.2142	0	112.1	1	0	0		5.2	3.7	0.22
1609	2	52.726	6.71	13.8	279	4	0.5	50	35	27	30	251	174	148	47	10	0.74	78	0	0	0	0	0	1	0	1	0	0	155.5	58.3	83	94.5	24.1	0	83	60	14.7	25.2144	0	61.7	0	0	1		5.8	5.3	0.11
1610	2	37.9973	5.47	13.6	238	4.4	0.6	52	16	9	11	243	156	51	77	11	0.6	91	0	0	0	0	0	0	0	0	0	0	156.4	53.5	70	92.5	22.2	0	104	79	13.49	25.215	0	77.6	0	0	1		5.2	4.7	0.04
1611	2	36.2438	6.66	15.6	287	4.5	0.6	82	32	33	53	240	157	111	61	12	0.68	97	0	0	0	0	0	0	0	0	0	0	159.5	55.6	79	97	21.7	0	117	77	14.02	25.2158	0	71.2	0	0	0		5.2	4.5	1.92
1612	2	57.5068	4.57	14	342	4.4	1.7	81	28	29	17	219	159	83	43	13	0.78	97	0	0	0	0	0	1	0	1	0	0	156	62.5	83	95	25.7	1	126	80	15.76	25.216	0	97.1	0	0	0		5.7	5.4	0.04
1613	1	39.4959	5.76	14.8	311	4	1	77	20	19	17	151	90	121	37	12	1.19	82	0	0	0	0	0	1	0	1	0	0	169.7	89.9	99	110	31.2	1	125	88	24.57	27.3304	1	132	1	0	1	5	5.7	8.3	0.9
1614	2	51.8493	6.21	15.7	360	4.5	1.1	72	21	16	8	219	147	73	57	10	0.63	88	0	0	0	0	0	0	0	0	0	0	155.6	60	85	97	24.8	0	108	81	15.13	25.2167	0	75.3	0	0	1		5.2	3.7	0.07
1615	1	44.4466	6.18	15.3	306	4.6	1	77	42	88	43	252	189	118	39	10	0.85	86	1	0	1	0	0	1	0	1	0	0	176	113.9	108	112	36.8	1	148	110	31.13	27.331	1	204.4	1	0	1		6.3	7.7	0.41
1616	1	37.3534	8.33	18	226	4.4	0.9	217	89	182	57	258	177	182	45	13	0.9	95	1	0	1	0	0	0	1	1	0	1	174.4	98.2	108	103	32.4	1	129	92	26.84	27.332	1	143.5	1	1	0		5.5	7.4	0.05
1617	2	52.6055	4.8	14.7	208	4.6	0.7	96	24	35	15	190	133	47	48	11	0.52	73	0	0	0	0	0	1	0	1	0	0	148.8	48.1	72	88	21.7	0	106	76	12.13	25.2183	0	71.7	0	0	0		5.5	4.9	0.12
1618	2	35.2521	7.82	15.5	339	4.6	1.1	76	15	14	11	203	133	74	55	11	0.62	79	0	0	0	0	0	0	0	0	0	0	153.7	48.1	72	89	20.4	0	117	83	12.13	25.2183	0	73.9	0	0	0		5.5	4.8	0.09
1619	2	24.7699	5.26	13	210	4.5	0.5	34	16	13	5	170	87	69	69	12	0.65	84	0	0	0	0	0	0	0	0	0	0	155.8	49.2	64	87	20.2	0	108	78	12.41	25.2236	0	37.1	0	0	1		5.2	4	0.17
1620	2	62.0274	4.76	12.1	195	4.2	0.7	61	31	22	16	180	103	76	62	12	0.74	98	0	0	0	0	0	0	1	1	1	0	148.5	46.9	74	86	21.2	0	127	79	11.83	25.2239	0	69	0	0	0		5.8	3.2	0.27
1621	2	30.3233	5.27	13.3	306	4.5	1	59	23	17	10	181	106	45	66	13	0.59	87	0	0	0	0	0	0	0	0	0	0	159.7	53.6	74	92	21	0	107	67	13.52	25.2239	0	85.7	0	0	0		5.3	4.5	0.04
1622	2	26.7699	7.69	14.4	262	4.5	0.7	73	17	14	16	220	134	81	70	11	0.69	84	1	0	1	0	0	0	0	0	0	0	164.6	66.6	90	105	24.6	0	112	90	16.8	25.2252	0	88.3	0	0	0		4.8	5.3	0.06
1623	2	44.2712	6.31	12.8	325	4.6	1.8	97	35	36	142	178	109	70	55	8	0.65	84	0	0	0	0	0	0	0	0	0	0	154	48.4	70	91	20.4	0	106	75	12.21	25.2273	0	70.8	0	0	0		5.5	4.3	0.2
1624	2	56.989	4.77	13.9	205	4.2	0.5	44	26	18	11	251	142	65	96	11	0.65	92	0	0	0	0	0	0	0	0	0	0	159.3	57.2	84	91	22.6	0	100	79	14.43	25.2273	0	107.4	1	0	1		5.8	4.7	0.03
1625	2	63.0603	4.47	13.3	170	4.4	1.1	70	23	17	12	220	145	53	64	19	0.7	89	0	1	1	0	0	0	0	0	0	0	153.4	57.2	84	93	24.3	0	121	82	14.43	25.2273	0	108.3	1	0	0		5.5	4.2	0.07
1626	2	28.0356	11.82	16.1	278	4.7	1.7	66	20	12	24	212	103	171	75	16	0.68	60	0	0	0	0	0	0	1	1	0	1	155.4	48	76	86	20	0	116	82	12.11	25.2292	0	58.4	0	0	1		4.7	6.3	0.09
1627	2	51.9151	6.5	12.9	327	4.4	0.7	69	15	12	15	260	181	79	63	13	0.7	82	0	0	0	0	0	0	0	0	0	0	160.1	55.8	86	94	21.8	0	116	78	14.08	25.233	0	86.7	0	0	1		5.8	4.3	0.06
1628	2	36.1753	12.79	13.9	302	4.6	0.9	62	22	18	11	167	92	48	65	10	0.62	83	0	0	0	0	0	0	0	0	0	0	159.1	53.3	78.5	94	21.1	0	104	77	13.45	25.2345	0	55.3	0	0	1		5.1	3.8	0.28
1629	2	74.7671	6.58	12.7	188	3.7	1	62	18	11	13	124	74	45	41	21	0.63	106	0	1	1	0	0	1	1	1	1	0	155.5	63.4	80	99	26.2	1	127	79	16	25.2366	0	132.8	1	0	0		5.6	7.7	1.11
1630	2	37.4466	8.36	13	360	4	0.6	66	16	13	9	179	100	124	54	15	0.86	96	0	0	0	0	0	0	0	0	0	0	154.1	60.9	82	102	25.6	1	100	63	15.37	25.2381	0	91.5	0	0	0		5.4	4.2	1.25
1631	2	60.9562	5.57	12.5	260	4.4	0.8	42	47	44	18	257	178	139	51	14	0.65	97	1	0	0	0	0	0	0	0	0	0	160.6	75.4	90	103	29.2	1	123	89	19.03	25.2387	0	114.6	1	0	0		6.1	5.4	0.14
1632	2	54.5534	3.56	13.7	215	4	0.7	72	22	26	39	197	128	92	51	12	0.51	93	0	0	0	0	0	0	1	1	1	0	158.5	58.6	72	95	23.5	0	109	68	14.79	25.2389	0	74.5	0	0	1		5.2	5.2	0.04
1633	2	54.1151	5.41	13.8	228	4.3	0.8	128	24	25	17	285	213	88	54	15	0.75	107	0	0	0	0	0	0	0	0	0	0	159.8	67.3	86	101	26.2	1	108	70	16.99	25.2452	0	107.1	1	0	0		6.4	4.7	0.27
1634	2	50.6658	5.21	13.1	181	3.8	1.1	54	37	15	10	205	125	69	66	10	0.62	87	0	0	0	0	0	0	0	0	0	0	159.3	64.8	87	104	25.5	1	124	80	16.36	25.2469	0	108.4	1	0	0		5.2	4.7	0.22
1635	2	56.8548	4.64	13.4	346	4.7	1	64	30	33	20	269	200	69	55	13	0.5	87	1	0	0	0	0	0	1	1	1	0	149.9	58.7	91	93	26.1	1	118	84	14.82	25.247	0	88.5	0	0	0		5.3	5.1	0.06
1636	2	63.8986	5.53	13.7	389	4.3	0.8	89	29	34	31	178	121	99	37	12	0.66	141	1	0	0	0	1	1	0	1	0	0	154.5	68.8	90	96	28.8	1	115	73	17.37	25.2471	0	121.1	1	0	0		7.1	4.6	0.3
1637	2	50.6137	9.56	14.4	360	4.4	0.8	68	19	19	33	309	229	59	68	20	0.56	131	0	1	1	0	1	0	1	1	1	0	157.2	61.5	85	96	25	1	122	81	15.53	25.252	0	107.7	1	0	1		5.9	4.1	0.12
1638	2	31.1123	5.65	13.1	280	4.7	1	65	12	9	12	203	124	151	49	9	0.59	89	0	0	0	0	0	1	1	1	0	1	151.3	56.9	82	99	24.9	0	123	81	14.37	25.2548	0	86.2	0	0	0		5.4	4.8	0.04
1639	2	69.1315	6.52	13.7	268	4	0.8	60	22	21	7	188	123	62	53	14	0.5	90	0	0	0	0	0	0	0	0	0	0	154.3	56.7	83	96	23.8	0	121	78	14.32	25.2557	0	75.2	0	0	0		5.4	4.6	0.04
1640	1	46.737	7.61	15.7	300	4.4	1.3	96	51	88	32	198	133	114	42	14	1.09	83	1	1	1	0	0	0	0	0	0	0	165.9	95.6	102	107	34.7	1	131	98	26.13	27.3326	1	228.8	1	0	0		5.6	5.4	0.97
1641	2	50.8658	7.9	13	245	4.6	0.9	60	29	20	11	182	102	50	70	13	0.6	65	0	0	0	0	0	0	0	0	0	0	154	42.8	68	92	18	0	99	73	10.81	25.257	0	56.2	0	0	0		5.3	4.2	0.17
1642	1	48.6767	5.09	14.2	284	4.6	1	105	29	35	55	217	139	78	62	12	0.66	103	0	0	1	0	0	0	0	0	0	0	167.6	67.2	90	100	23.9	0	131	97	18.37	27.3363	1	83.3	0	0	1		5.5	4.9	0.05
1643	2	58.6767	5.59	13	221	4	0.4	76	18	17	12	174	83	262	39	18	0.47	94	1	0	1	0	0	1	1	1	0	1	158	71.9	91	98	28.8	1	137	91	18.16	25.2573	0	151.5	1	0	0		6.2	2.6	0.12
1644	2	71.0658	6.02	13.5	213	4.4	0.8	64	24	17	15	167	92	132	49	15	0.64	95	1	0	0	0	0	1	1	1	1	0	159.6	71.7	91	102	28.1	1	128	77	18.11	25.258	0	164.2	1	0	0		5.6	4.4	0.19
1645	2	50.8219	9.55	12.3	269	4.6	0.7	68	46	33	16	280	186	81	78	12	0.74	86	0	0	0	0	0	0	0	0	0	0	155.1	56.1	84	94	23.3	0	123	88	14.17	25.2585	0	86.8	0	0	0		5.5	5.4	0.16
1646	2	46.0904	5.51	12.5	229	4.1	1.3	52	23	18	19	191	103	112	66	12	0.6	98	0	0	0	0	0	0	0	0	0	0	153.6	46.4	69	84.5	19.8	0	104	72	11.72	25.2586	0	63.3	0	0	1		5.6	3.7	0.02
1647	2	65.9288	3.79	13.1	224	4.3	1	56	19	16	10	161	93	55	57	15	0.62	103	1	1	1	0	0	0	1	1	1	0	161.2	73.2	96	103	28.2	1	121	80	18.49	25.2596	0	133.1	1	0	1		5.4	4.8	0.02
1648	2	55.274	2.94	13.2	168	4.6	0.9	73	31	27	15	186	102	34	77	15	0.69	81	0	0	0	0	0	0	0	0	0	0	158.6	55.7	83	93	22.1	0	111	73	14.07	25.2603	0	100.1	1	0	1		5.3	4.2	0.02
1649	2	74.4055	8.1	10.1	491	4.2	0.4	47	21	20	15	180	111	145	40	27	1.53	165	1	1	1	1	1	1	1	1	1	0	156.2	63.3	89	98	25.9	1	87	56	15.99	25.2607	0	101.7	1	0	1		8	4.3	0.36
1650	2	46.8137	5.23	13.9	203	4.3	1	64	28	17	8	182	115	83	50	11	0.6	80	0	0	0	0	0	0	0	0	0	0	158.2	55.5	82.5	90	22.2	0	106	68	14.02	25.2613	0	74	0	0	0		5	3.4	0.02
1651	2	60.663	5.89	15	304	4.1	0.5	68	17	14	11	213	136	144	48	11	0.54	95	1	0	0	0	0	1	0	1	0	0	156.3	66.3	92	100	27.1	1	98	63	16.75	25.264	0	143.8	1	1	0		5.9	3.7	0.09
1652	2	37.1836	3.57	14.8	244	4.4	0.9	68	27	26	14	204	99	74	90	9	0.52	91	0	0	0	0	0	0	0	0	0	0	157	54.9	78	95	22.3	0	114	80	13.87	25.2641	0	78	0	0	1		5.3	3.9	0.02
1653	2	54.7644	9.69	13.9	335	3.8	0.8	72	31	26	40	253	158	142	67	9	0.68	83	0	0	0	0	0	0	0	0	0	0	152.3	43.3	67	86	18.7	0	127	82	10.94	25.2656	0	57.7	0	0	0		5.8	4.2	0.64
1654	2	39.4795	3.97	12	229	4.3	1.3	39	26	23	14	203	114	53	78	10	0.61	84	0	0	0	0	0	0	0	0	0	0	153.1	41.2	65.5	86.5	17.6	0	84	66	10.41	25.267	0	39.6	0	0	0		5.4	4	0.02
1655	2	32.7425	3.58	12.7	248	4.5	0.6	56	18	9	8	207	137	82	54	17	0.7	89	0	0	0	0	0	0	0	0	0	0	158.2	54.1	74	95	21.6	0	113	86	13.67	25.268	0	77.3	0	0	0		5.1	4.2	0.05
1656	2	48.5644	4.18	14.2	295	4.3	0.8	53	22	18	30	231	138	142	65	11	0.72	80	1	0	1	0	0	0	0	0	0	0	165.3	74.4	100	102	27.2	1	131	91	18.8	25.2688	0	107.1	1	0	1		5.5	4.6	0.06
1657	2	56.0027	3.88	11.3	339	4.3	0.7	60	35	23	33	193	114	113	56	7	0.77	81	0	0	0	0	0	0	0	0	0	0	156.9	51.8	72	89	21	0	98	75	13.09	25.2703	0	89.7	0	0	1		5.9	5.6	0.04
1658	2	55.5589	5.31	13.1	215	4.2	0.6	117	29	39	19	216	140	119	52	21	0.61	109	0	1	1	0	0	0	0	0	0	0	155.8	64.3	87	93	26.4	1	122	77	16.25	25.2722	0	127.5	1	0	0		5.7	3.7	0.02
1659	2	40.9534	6.43	14	296	4.5	0.8	59	17	10	36	186	115	82	55	10	0.71	79	0	0	0	0	0	0	0	0	0	0	162.5	66	86	103	25	1	94	63	16.68	25.2727	0	64.8	0	0	0		5.6	5.1	0.06
1660	1	43.5288	6.19	16.7	175	4.5	2.2	55	48	72	37	240	174	135	39	11	0.9	98	1	0	1	0	0	1	0	1	0	0	176	102.6	110	115	33.1	1	140	90	28.05	27.3392	1	192.6	1	1	1		5.7	6.6	0.17
1661	2	56.4493	3.66	13.5	299	4.3	2.6	88	23	17	24	175	119	162	24	11	0.8	84	1	0	0	0	0	1	1	1	0	1	156.2	58	90	93	23.8	0	106	76	14.66	25.2759	0	65	0	0	0		5.7	5.4	0.07
1662	2	71.7288	4.44	12.6	226	3.8	1.7	67	27	18	9	155	90	34	58	17	0.71	63	0	0	0	0	0	0	1	1	1	0	152.2	54.2	86	94	23.4	0	88	63	13.7	25.2768	0	87.8	0	0	0		5.3	3.8	0.06
1663	2	58.9014	4.25	13.1	268	4.1	0.9	92	19	11	16	217	92	384	48	13	0.51	89	1	0	1	0	0	1	1	1	1	1	160.7	71.8	103	100	27.8	1	133	97	18.15	25.2786	0	118.7	1	0	1		5.2	4	0.22
1664	1	39.9918	5.3	16.5	241	4.4	0.9	96	23	29	25	206	148	86	41	12	1.01	83	0	1	1	0	0	0	1	1	1	0	167.8	89.7	98	110	31.9	1	134	96	24.53	27.3467	1	137.6	1	0	1		5.5	7.9	0.1
1665	2	51.6849	4.76	13.1	238	4.4	0.6	50	18	23	14	245	154	177	56	16	0.57	97	0	0	0	0	0	0	1	1	0	1	158.8	57.4	85.5	93	23	0	112	73	14.51	25.2787	0	71.5	0	0	0		5.6	4.7	0.04
1666	1	32.7123	8.28	16.2	297	4.5	1	65	16	19	31	222	139	171	49	9	0.74	84	1	0	1	0	0	0	1	1	0	1	178.9	108.1	106	111	33.8	1	145	100	29.57	27.3543	1	153.2	1	1	1		5	6.2	0.06
1667	2	60.6438	3.88	13.1	246	4.5	0.7	94	27	14	14	230	131	90	81	12	0.49	92	0	0	0	0	0	0	0	0	0	0	145.3	39.2	66	81	18.6	0	97	64	9.91	25.2806	0	48.4	0	0	0		5.6	4	0.06
1668	1	78.6822	5.44	17.3	235	4.3	0.9	82	77	44	319	222	113	102	89	11	0.67	90	0	0	1	0	0	0	1	1	1	0	167.7	70.7	97	98	25.1	1	153	83	19.34	27.355	1	176.3	1	0	1		5.1	7.1	0.95
1669	1	68.211	6.23	14.6	227	4.2	1.5	63	23	19	16	119	50	101	49	13	0.81	82	0	1	1	0	0	0	0	0	0	0	164.8	76.9	96	102	28.3	1	105	74	21.04	27.3602	1	132.1	1	0	0		5.7	3.6	0.04
1670	2	57.1178	3.77	14.7	230	4.4	1.3	72	17	15	13	208	97	112	89	14	0.81	96	0	1	1	0	0	0	0	0	0	0	158.3	56.8	78	93	22.7	0	107	71	14.36	25.2817	0	108.8	1	0	0		5.1	5.7	0.15
1671	2	25.9616	5.69	13.5	253	4.6	0.9	60	14	8	9	168	87	64	68	18	0.66	77	0	0	0	0	0	0	0	0	0	0	150.8	47.9	76	93	21.1	0	87	58	12.11	25.2818	0	19.9	0	0	0		5.1	4.9	0.02
1672	2	57.8795	3.7	14.6	289	4.3	0.7	66	60	68	22	198	122	156	45	11	0.72	84	1	0	0	0	0	1	1	1	0	1	151.1	60.2	90	95	26.4	1	100	79	15.22	25.2824	0	90.7	0	0	0		5.7	4.3	0.13
1673	1	35.1151	8.69	16.5	283	4.8	1.1	74	95	186	112	245	161	240	36	11	0.94	110	1	0	0	0	0	1	1	1	0	1	169.7	87.2	104	108	30.3	1	111	83	23.86	27.3624	1	128.5	1	1	0		5.6	7.4	0.15
1674	1	69.6192	5.54	14.8	252	4.2	1.2	51	14	11	14	204	139	75	50	14	0.81	112	0	1	1	0	0	0	0	0	0	0	166.7	83.5	96.5	102	29.9	1	119	81	22.85	27.3653	1	157.5	1	0	1		6	6.3	0.02
1675	2	29.5699	6.97	13.4	333	4.3	0.9	51	14	10	11	174	95	55	68	9	0.46	76	0	0	0	0	0	0	0	0	0	0	153.9	51.3	70	90	21.7	0	96	60	12.97	25.2827	0	38.5	0	0	1		4.8	4.8	0.06
1676	2	71.9068	4.54	14.5	309	4.1	1	81	24	9	13	248	179	86	52	15	0.74	91	0	1	1	0	0	0	0	0	0	0	146.8	49.4	78	89	22.9	0	121	82	12.49	25.2834	0	78.6	0	0	0		5.9	4.8	0.45
1677	2	60.0219	3.12	13	176	4.3	0.6	59	26	20	11	230	147	78	67	8	0.65	86	0	0	0	0	0	0	0	0	0	0	153.2	56.2	85	102	23.9	0	132	85	14.21	25.2847	0	75.8	0	0	0		5.3	4.5	0.03
1678	2	51.2658	6.53	13.6	461	4.9	1.3	98	22	17	11	196	130	96	47	17	0.81	130	0	1	1	0	1	1	0	1	0	0	162.2	61.1	80.5	97.5	23.2	0	132	72	15.45	25.2864	0	104.1	1	0	0		5.7	5.1	0.1
1679	2	62.3123	5.19	12.8	306	4.4	0.9	67	30	12	11	268	190	60	66	9	0.79	97	0	0	1	0	0	0	0	0	0	0	156.7	71.3	86	105	29	1	148	85	18.03	25.2875	0	94.3	0	0	0		5.6	5.4	0.08
1680	2	30.8055	6.35	14.2	244	4.2	0.8	61	15	12	7	182	106	65	63	11	0.6	71	0	0	0	0	0	0	0	0	0	0	148.9	48.6	75	92	21.6	0	106	69	12.29	25.2881	0	39.6	0	0	0		5.1	5.1	0.02
1681	2	54.2822	5.9	14.2	258	4.1	1	86	30	18	15	270	177	199	53	23	1.46	88	1	1	1	0	0	0	1	1	0	1	151.1	59	88	92	25.8	1	125	86	14.92	25.2881	0	106	1	0	0		5.5	10.1	0.07
1682	2	28.937	5.27	13.3	274	4.2	0.7	65	15	11	9	152	52	91	82	7	0.64	88	0	0	0	0	0	0	0	0	0	0	159.7	63.3	81	103	24.8	0	100	66	16.01	25.2923	0	70	0	0	1		5	4.5	0.1
1683	2	29.4932	6.42	13.8	289	4.6	1	44	13	12	11	176	117	57	48	9	0.63	91	0	0	0	0	0	1	0	1	0	0	167.7	66.7	79	98	23.7	0	121	81	16.87	25.2924	0	97.9	0	0	0		5.3	3.5	0.12
1684	2	62.0082	6.7	13	268	4	0.7	62	18	16	16	176	101	72	61	16	0.73	92	0	0	0	0	0	0	1	1	1	0	154.9	55.9	77	92	23.3	0	122	86	14.14	25.2952	0	69.1	0	0	0		5.6	4.5	0.13
1685	2	65.989	6.18	13.1	233	4.3	0.8	51	25	18	14	158	77	87	64	12	0.68	142	0	0	0	1	1	0	0	0	0	0	154.2	47.4	80	84	19.9	0	109	85	11.99	25.2954	0	73.9	0	0	0		9.2	3.3	0.07
1686	1	44.7836	5.59	17.2	234	4.5	1.2	58	32	42	44	208	132	107	55	13	1	104	0	0	0	0	0	0	0	0	0	0	167.1	85.3	100.5	103	30.6	1	124	88	23.35	27.374	1	138.9	1	1	1		5.3	7.8	0.75
1687	2	56.2384	6.5	13.8	369	4.3	1	75	28	23	31	168	77	195	52	18	0.84	95	0	0	0	0	0	0	1	1	1	1	160.2	62.3	81	95	24.3	0	99	63	15.76	25.297	0	116.6	1	0	1		5.8	4.3	0.05
1688	2	53.8411	4.38	13.5	295	4.5	0.9	80	22	14	17	220	140	130	54	14	0.68	93	0	1	1	0	0	0	0	0	0	0	150.6	53.8	83	95	23.7	0	111	74	13.61	25.2974	0	61.3	0	0	0		5.1	4.5	0.06
1689	2	30.5616	9.39	13.3	377	4.3	0.7	32	24	16	25	222	119	184	66	7	0.49	76	0	0	0	0	0	0	1	1	0	1	153	41.7	67	82	17.8	0	88	70	10.55	25.2998	0	45.9	0	0	1		5	3.8	0.04
1690	2	56.1452	4.2	12.1	257	4.4	0.7	79	22	13	27	255	177	104	57	17	0.73	92	0	0	0	0	0	0	1	1	1	0	154.9	49.4	77	90	20.6	0	89	70	12.5	25.3036	0	92.8	0	0	1		5.5	6.3	0.09
1691	2	37.8219	12.76	14.4	198	4.4	0.5	54	15	5	8	146	59	50	77	10	0.6	101	1	0	0	0	0	0	0	0	0	0	159.5	65.8	89	102	25.9	1	106	72	16.65	25.304	0	81.1	0	0	0		5.1	4.7	5.6
1692	2	32.3945	4.97	13.7	257	4.4	1.1	56	20	15	12	192	112	57	69	12	0.71	92	1	0	0	0	0	0	0	0	0	0	162.5	66.9	90	99	25.2	1	107	71	16.93	25.3064	0	71.5	0	0	1		5.3	4.3	0.04
1693	2	37.0904	6.29	14.6	233	4.8	0.8	53	20	16	20	239	143	48	86	16	0.55	62	0	0	0	0	0	0	0	0	0	0	159.1	48.8	78	92	19.3	0	99	67	12.35	25.3074	0	64.9	0	0	1		5.2	4.6	0.02
1694	2	40.3616	3.76	10.7	304	4.3	0.8	45	16	7	3	203	110	68	79	10	0.61	85	0	0	0	0	0	0	0	0	0	0	155.6	53.3	67	95	22	0	92	66	13.49	25.3096	0	49.9	0	0	0		5.3	3	0.02
1695	2	32.0904	4.06	12.8	291	4.2	0.6	71	16	12	8	167	91	46	67	11	0.71	95	0	0	0	0	0	0	0	0	0	0	159.7	57.8	82	93	22.6	0	99	68	14.63	25.3114	0	72	0	0	1		5.5	5.4	0.03
1696	1	56.6274	10.55	16.5	214	4.2	1	87	31	35	34	188	122	91	48	13	0.78	85	0	0	0	0	0	0	0	0	0	0	168.5	89.5	82	90	24.3	0	125	86	24.5	27.3743	1	108.8	1	1	1		5.8	5.4	0.2
1697	2	50.3726	4.88	14.5	246	4.3	0.7	55	21	20	12	222	144	46	69	13	0.62	83	0	0	0	0	0	0	0	0	0	0	157.2	59.3	86	99	24	0	107	66	15.01	25.312	0	96.6	0	0	1		5.4	5.5	0.06
1698	1	74.7233	6.08	14.4	252	4.2	0.7	74	33	32	24	222	160	118	38	22	0.9	107	0	1	1	0	0	1	0	1	0	0	155.5	69.7	99	101	28.8	1	123	80	19.08	27.3745	1	140.9	1	0	1		5.7	4.8	0.13
1699	1	30.7836	10.96	16	286	4.7	1	85	35	28	25	175	82	64	80	11	0.68	61	0	0	0	0	0	0	0	0	0	0	169.9	80.8	101	106	28	1	131	89	22.12	27.3762	1	111.6	1	0	1		5.2	6.3	0.66
1700	1	30.1726	5.94	16	246	4.5	1.1	69	20	20	19	196	114	76	67	10	0.89	97	0	0	1	0	0	0	0	0	0	0	166.4	76.5	95	103	27.6	1	150	99	20.95	27.3856	1	86.6	0	0	1		5.2	5	0.07
1701	2	46.2548	5.96	14.6	384	4.6	0.8	55	18	21	23	192	89	103	82	8	0.77	121	1	0	1	0	0	0	0	0	0	0	167.4	76.8	93	100	27.4	1	134	93	19.44	25.3125	0	154.5	1	0	0		5.9	3.7	0.08
1702	2	26.8575	7.89	14	241	4.8	0.9	72	48	77	54	207	129	109	56	10	0.47	102	0	0	0	0	0	0	0	0	0	0	169.7	76.2	81	104	26.5	1	119	84	19.29	25.315	0	130.5	1	0	0		5.4	6.1	0.17
1703	2	51.2247	9.05	13.2	231	4.1	0.6	75	19	16	18	197	115	207	41	15	0.56	115	1	0	0	0	0	1	1	1	0	1	159.1	67.4	95	98	26.7	1	117	78	17.0627	25.3155	0	83.9925	0	0	0		6.7	5.5	0.21
1704	2	74.7836	5.91	12.7	204	4.2	0.5	98	18	14	10	177	98	148	49	22	0.66	108	0	0	0	0	0	1	0	1	0	0	143.8	54.7	83	98.5	26.7	1	127	83	13.85	25.3199	0	106.8	1	0	0		5.1	5.1	0.02
1705	2	33.8301	7.75	14	229	4.3	0.6	63	16	14	9	193	102	70	77	11	0.52	77	0	0	0	0	0	0	0	0	0	0	157.1	49.6	76	89	20.1	0	97	62	12.56	25.3226	0	77.8	0	0	1		5.1	4.1	0.05
1706	2	47.0384	5.18	14.3	241	4.2	1	79	16	6	13	204	140	66	51	12	0.8	89	0	0	1	0	0	0	0	0	0	0	151.9	51.1	75	88	22.1	0	133	96	12.94	25.3229	0	69.8	0	0	0		5.4	4.6	0.11
1707	1	37.1863	9.1	16.5	267	4.6	1.2	65	28	54	40	228	161	127	42	13	0.85	90	1	0	0	0	0	0	0	0	0	0	171.3	103.3	107	120	35.2	1	131	88	28.29	27.3863	1	215.6	1	1	0		5.8	8.2	0.61
1708	2	38.4082	5.56	13.8	323	4.8	1.3	39	19	15	13	232	152	62	68	10	0.83	106	0	0	0	0	0	0	0	0	0	0	158.5	54.1	73	89	21.5	0	120	85	13.7	25.3235	0	95.1	0	0	0		5.9	5.4	0.04
1709	2	32.4274	5.38	12.8	224	4.5	0.6	51	17	14	11	172	105	73	52	10	0.75	93	0	0	0	0	0	0	0	0	0	0	159.7	63.3	76.5	101	24.8	0	105	72	16.03	25.3239	0	68.1	0	0	0		5.4	4.4	0.04
1710	1	62.6027	10.33	19.4	314	4.3	1.7	58	22	27	25	133	77	117	33	10	0.96	103	1	1	1	1	1	1	1	1	1	0	168.7	83.8	102	102	29.4	1	122	97	22.96	27.3986	1	145	1	1	0		6.4	7.5	0.2
1711	2	58.3315	3.83	14.6	198	4.7	1.3	74	22	15	25	248	153	83	78	18	0.89	88	0	0	0	0	0	0	0	0	0	0	150.6	49.4	78	85	21.8	0	111	87	12.51	25.3239	0	82.2	0	0	1		5.4	5.5	0.1
1712	1	74.3452	5.46	13.9	183	4.1	1	49	48	33	21	116	55	129	35	18	1.31	102	0	1	1	0	0	1	0	1	0	0	169.8	80.2	98	95	27.8	1	136	71	21.98	27.4065	1	166.6	1	0	1		5.9	7.7	0.11
1713	2	59.5671	4.57	13.9	266	4.4	1.1	61	45	61	29	172	105	80	51	17	0.68	100	0	0	0	0	0	0	1	1	1	0	151.6	45.6	73	83	19.8	0	98	72	11.55	25.3289	0	67.1	0	0	0		5.4	3.4	0.03
1714	2	44.5534	6.35	8.9	384	4.2	0.3	51	18	10	13	177	85	206	51	13	0.46	85	0	0	0	0	0	0	1	1	0	1	160.8	57.2	74	92	22.1	0	87	70	14.49	25.3322	0	66.7	0	0	1		5.6	2.9	0.05
1715	2	85.5616	6.76	11.6	140	4.6	1.4	56	32	11	16	188	122	51	56	17	0.93	106	0	1	1	0	0	0	1	1	1	0	158.7	61.7	84	94	24.5	0	123	65	15.63	25.3323	0	101.3	1	0	0		5.2	2	0.03
1716	2	55.1644	5.34	16.1	276	4.2	0.9	99	23	20	28	216	137	136	52	9	0.78	85	1	0	0	0	0	0	0	0	0	0	156.8	58.3	88	95	23.7	0	116	76	14.77	25.3345	0	108.9	1	0	1		5.2	4.9	0.04
1717	1	30.9973	6.08	15.1	268	4.6	1.4	59	33	47	30	187	106	199	41	10	1.1	97	0	0	1	0	0	0	1	1	0	1	170.2	93	98	106	32.2	1	123	90	25.5	27.4194	1	179	1	0	1		5.7	9.4	0.11
1718	2	30.2849	4.91	14.7	266	4.8	1.9	69	21	10	8	220	142	73	63	13	0.71	82	0	0	0	0	0	0	0	0	0	0	159.8	59.6	78	99	23.3	0	124	80	15.1	25.3356	0	99.8	0	0	1		4.6	3.5	0.02
1719	2	42.8849	5.97	13.9	274	4.4	0.9	34	43	73	17	197	123	206	33	9	0.58	90	1	0	0	0	0	1	1	1	0	1	164.1	75.7	91	103	28.1	1	118	79	19.18	25.3369	0	108.1	1	0	0		5.8	5.7	0.29
1720	2	51.5397	3	12.5	252	4.1	0.7	71	23	20	11	193	120	86	56	16	0.61	92	0	0	0	0	0	0	0	0	0	0	156.5	62.2	79.5	94	25.6	1	104	72	15.76	25.3376	0	95.4	0	0	0		5.7	5	0.04
1721	2	58.2986	6.18	12.7	272	4.6	1.1	86	31	33	12	216	125	199	51	14	0.9	137	0	1	1	1	1	0	1	1	1	1	154.3	54.7	83	94	23	0	116	75	13.86	25.3382	0	84	0	0	0		7	6.6	0.1
1722	1	46.5644	6.06	15.1	253	4.4	0.5	89	56	89	97	226		433	41	19	0.8	124	1	0	1	0	0	0	1	1	0	1	171.2	97.8	106	110	33.4	1	142	92	26.82	27.4233	1	203.7	1	1	1		6.9	4.9	0.28
1723	2	85.3726	9.7	10.5	380	3.8	0.7	107	34	26	12	158	106	75	37	12	0.91	108	0	0	0	0	0	1	0	1	0	0	154.3	51.7	82	88	21.8	0	117	53	13.1	25.3385	0	83.8	0	0	0		5.8	3.7	0.25
1724	2	62.8493	7.49	15	312	4.3	0.9	54	52	23	53	183	101	55	71	12	0.74	95	0	0	0	0	0	0	0	0	0	0	153.3	51.7	84	91	22	0	116	81	13.1	25.3385	0	87.4	0	0	1		5.6	4.6	0.11
1725	2	49.2603	5.58	14.1	200	4.4	0.5	42	21	18	13	233	169	94	45	9	0.54	99	0	0	1	0	0	1	0	1	0	0	157.7	60.5	80	94	24.3	0	133	93	15.33	25.3388	0	87.5	0	0	0		5.1	3.8	0.13
1726	1	62.0849	5.34	16	219	4.3	1.4	101	24	16	32	212	130	105	61	13	0.82	91	0	1	1	0	0	0	0	0	0	0	164.9	78.6	96	99	28.9	1	134	88	21.56	27.43	1	128	1	0	1		5.5	6	0.02
1727	2	43.1945	4.78	11.3	284	4	0.6	56	20	20	10	233	153	70	66	13	0.48	94	0	0	0	0	0	0	1	1	1	0	150.5	53	82	87	23.4	0	119	79	13.43	25.3396	0	74.5	0	0	0	12.6	5.6	2.6	0.06
1728	2	48.3096	3.72	13.7	235	4.5	1.5	74	21	26	28	208	151	83	40	11	0.63	92	1	0	0	0	0	1	0	1	0	0	164.5	78.1	90	108	28.7	1	123	83	19.7904	25.3398	0	116.278	1	0	0		5.5	6.5	0.45
1729	2	71.5014	4.71	13.1	226	4.5	1.2	67	26	20	10	236	158	67	65	14	0.74	91	0	0	0	0	0	0	0	0	0	0	146.8	45.5	83	90	21.1	0	132	74	11.53	25.3407	0	83.6	0	0	0		5.4	5.7	0.1
1730	1	27.7507	7.81	17.5	248	4.5	2.1	92	20	20	25	211	107	287	47	7	0.77	90	0	0	1	0	0	0	1	1	0	1	176.7	94.6	100	107.5	30.3	1	154	105	25.95	27.4313	1	165.2	1	0	1		4.8	6.3	0.13
1731	2	32.1123	5.96	14.4	337	4.3	1	34	18	16	18	178	93	80	69	10	0.58	89	0	0	0	0	0	0	0	0	0	0	154.2	58.6	80	99	24.6	0	111	70	14.85	25.3413	0	71.4	0	0	1		5.2	2.5	0.02
1732	2	33.3096	4.4	14.4	292	4.5	0.6	56	16	8	10	176	102	153	43	11	0.57	92	0	0	0	0	0	1	1	1	0	1	157.8	52.4	73	94	21	0	113	73	13.28	25.3435	0	63.6	0	0	0		5.2	4.7	0.04
1733	2	85.3178	6.8	11.3	472	4	1.4	62	29	32	26	125	73	72	38	10	0.53	110	0	0	0	0	0	1	0	1	0	0	146.5	42.1	70	80	19.6	0	99	66	10.67	25.3444	0	56.7	0	0	0		5.8	4.3	0.17
1734	1	28.8274	6.96	16.9	291	4.5	1	106	116	197	79	241	165	132	50	10	0.86	132	1	0	1	0	1	0	0	0	0	0	180.3	118.1	118	124	36.3	1	146	85	32.4	27.4344	1	128.7	1	0	0		7.6	6.9	0.2
1735	2	72.2055	3.56	13.6	216	4.1	1	96	32	28	20	208	130	99	58	12	0.72	93	0	1	1	0	0	0	0	0	0	0	150.6	51.8	80	87	22.8	0	121	71	13.13	25.3475	0	63.5	0	0	0		5.3	5.5	0.05
1736	2	68.6767	4.71	15.1	261	4.5	1.2	90	22	18	12	231	152	63	66	12	0.69	84	1	0	1	0	0	0	0	0	0	0	160.6	56.1	88	90	21.8	0	120	94	14.22	25.3476	0	101.6	1	0	0		5.3	5	0.15
1737	1	40.5562	6.72	13.4	447	4.2	1	96	22	29	63	176	118	79	42	15	0.66	90	1	1	1	0	0	0	0	0	0	0	185.7	119.4	119	117	34.6	1	123	81	32.76	27.4372	1	255.8	1	1	1		5.8	6.9	0.95
1738	2	37.9726	6.24	12.4	205	4.3	0.9	70	21	16	22	162	85	49	67	10	0.66	73	0	0	0	0	0	0	0	0	0	0	157.3	58.7	80	97	23.8	0	99	67	14.88	25.3492	0	88.8	0	0	0		5.1	4.3	0.38
1739	2	60.2137	4.21	14.6	202	4.5	1.1	65	20	18	23	259	175	145	55	13	0.65	98	0	0	0	0	0	0	1	1	1	0	156.2	54.4	86.5	89	22.4	0	106	70	13.79	25.3493	0	100.1	1	0	0		5.4	4	0.02
1740	1	52.4466	3.88	15.6	200	4.2	1	80	35	57	15	192	122	85	53	12	1.17	75	0	1	1	0	0	0	0	0	0	0	170.7	84.2	99	104.5	28.9	1	134	100	23.11	27.4466	1	112.4	1	0	0		5.3	7	0.12
1741	2	30.1233	7.52	14.1	226	4.3	1.1	53	19	12	9	166	85	69	67	8	0.65	86	0	0	0	0	0	0	0	0	0	0	150.8	44.1	69.5	90	19.4	0	105	74	11.18	25.3515	0	41.2	0	0	0		5.4	4.4	0.02
1742	2	61.3123	6.43	14	244	4.1	1.2	80	20	18	14	211	160	54	40	17	0.71	88	1	0	0	0	0	1	1	1	1	0	158.5	69.5	99	98	27.5	1	122	84	17.62	25.3525	0	110.3	1	0	0		5.8	4.1	0.05
1743	2	57.6712	5.33	13.2	207	4.2	1.1	63	24	22	27	233	157	159	44	13	0.51	96	0	0	1	0	0	1	1	1	0	1	154.3	55.3	86	95	23.2	0	122	90	14.02	25.3526	0	99.2	0	0	0		5.6	4.3	0.06
1744	2	57.4932	5.13	14.2	169	4.3	1	80	61	60	51	241	156	74	70	12	0.6	105	0	0	0	0	0	0	0	0	0	0	159.9	65	87	96	25.4	1	102	67	16.48	25.3538	0	112.6	1	0	0		6.5	4.1	0.09
1745	2	39	6.46	13.7	379	4.4	0.9	51	18	14	9	211	122	61	77	14	0.74	69	0	0	0	0	0	0	0	0	0	0	159.4	59.2	73	102	23.3	0	116	83	15.01	25.3547	0	90.1	0	0	0		5.2	5.5	0.13
1746	2	39.1397	5.02	12.5	240	4.4	1	20	21	15	8	186	109	72	63	11	0.57	78	0	0	0	0	0	0	0	0	0	0	163.8	54.7	83.5	94	20.4	0	99	66	13.87	25.3565	0	73.4	0	0	0		5.5	4.1	0.04
1747	2	46.263	4.75	12.3	308	4.2	0.9	62	15	10	6	189	129	81	44	13	0.8	91	0	0	0	0	0	1	0	1	0	0	157.8	64.4	79.5	97	25.8	1	93	71	16.33	25.3571	0	83.9	0	0	0		5.5	5.6	0.47
1748	1	49.9726	6.26	15.9	244	4.2	0.7	90	25	32	152	269	96	618	49	10	0.7	110	1	0	1	0	0	0	1	1	0	1	170.2	85.1	103	107	29.4	1	132	95	23.36	27.4501	1	172.2	1	0	1		5.7	7.6	0.34
1749	2	55.8795	3.28	11.9	273	4.3	0.5	103	16	15	13	228	149	127	54	16	0.7	108	1	1	1	0	0	0	0	0	0	0	162.2	68.5	98	101	26	1	116	82	17.37	25.3577	0	112.4	1	0	0		5.6	6	0.13
1750	2	55.411	4.88	13.5	285	4.2	0.7	68	29	26	7	237	169	99	48	13	0.64	86	0	0	0	0	0	1	0	1	0	0	154.3	50.2	77	87	21.2	0	115	74	12.73	25.3586	0	54.8	0	0	0		6	5	0.02
1751	2	54.3041	3.61	12.2	246	4.2	0.7	71	58	45	43	177	113	25	59	13	0.82	74	0	0	0	0	0	0	0	0	0	0	160.6	64.5	75.5	100	24.9	0	104	66	16.36	25.3643	0	101.5	1	0	0		5.2	5.2	0.02
1752	2	44.4082	3.99	13.4	259	4.3	0.6	36	19	10	6	162	69	123	68	10	0.63	84	0	0	0	0	0	0	0	0	0	0	157	51	75	100	20.7	0	119	87	12.94	25.3725	0	73	0	0	0		4.7	3.7	0.08
1753	1	60.9808	6.68	16.3	259	4.6	1.1	75	31	43	59	225	140	197	46	13	0.99	97	1	0	1	0	0	0	1	1	0	1	159.5	81.7	102	104	31.9	1	149	93	22.43	27.4541	1	77.9	0	0	1		5.7	9	0.73
1754	2	48.7562	5.08	14.1	205	4.2	1.3	62	31	26	15	173	93	105	59	8	0.58	83	0	0	0	0	0	0	0	0	0	0	149.9	55.8	80	99	24.8	0	123	82	14.16	25.3763	0	76.5	0	0	0		5.1	3.8	0.07
1755	2	52.0767	4.77	12.1	224	4.4	1	58	23	14	13	213	126	63	74	13	0.79	75	0	0	0	0	0	0	0	0	0	0	156.3	54.3	71	92	22.3	0	90	68	13.78	25.3775	0	70.1	0	0	0		5.7	6.1	0.08
1756	2	52.9918	5.76	15.4	406	4.4	1.2	79	22	22	11	244	165	141	51	14	0.64	116	0	0	0	0	0	0	0	0	0	0	154	48.9	77	84.5	20.6	0	122	80	12.41	25.3783	0	89.4	0	0	0		5.5	5.2	0.06
1757	2	59.9562	3.68	13.8	216	4.3	1.1	95	29	22	15	224	140	55	73	11	0.6	119	1	0	0	0	0	0	0	0	0	0	159.5	66	91	105	25.9	1	97	63	16.75	25.3788	0	125	1	0	1		5.8	3.5	0.06
1758	2	49.9205	5.87	13.8	271	4.5	1.6	56	24	16	11	223	154	54	58	12	0.72	99	0	0	0	0	0	0	0	0	0	0	154.5	54.1	81	87.5	22.5	0	122	78	13.73	25.3789	0	90.9	0	0	0		5.6	4.4	0.07
1759	2	67.6329	4.08	13.2	239	4.5	1	92	32	20	10	209	132	63	64	13	0.68	107	0	0	0	0	0	0	0	0	0	0	160.7	66.9	85	101	25.9	1	127	83	16.98	25.3812	0	98.5	0	0	0		6.4	4.2	0.07
1760	1	25.5452	9.9	13.8	442	4.3	0.5	102	18	16	13	209	144	130	39	12	0.83	88	0	0	0	0	0	1	0	1	0	0	171.8	88.4	99	108	29.9	1	107	69	24.27	27.4548	1	148.3	1	1	1		5.7	7.6	5.22
1761	2	59.1315	4.79	14	110	4.5	0.8	81	29	30	17	260	185	70	61	14	0.88	90	0	0	0	0	0	0	0	0	0	0	157	56.3	77.5	92	22.8	0	113	88	14.29	25.3819	0	101.5	1	0	0		5.5	5.1	0.18
1762	2	47.3205	6.3	12.1	257	3.6	0.9	63	18	13	24	194	109	183	48	9	0.54	115	0	1	1	0	0	1	1	1	0	1	153.2	61.3	82	91	26.1	1	136	97	15.56	25.3834	0	71.8	0	0	1		5.4	6.3	0.39
1763	1	52.2466	5.41	14.3	253	4.5	1.2	44	23	21	34	172	88	227	39	13	0.87	97	0	0	1	0	0	1	1	1	0	1	165.2	68.4	90.5	91	25.1	1	149	105	18.78	27.4561	1	137.3	1	0	1		5.2	6.6	0.03
1764	2	71.8795	5.19	12.5	244	4	0.6	62	20	12	10	134	72	138	34	17	0.94	108	1	1	1	1	1	1	0	1	0	0	158.4	71.7	92	101	28.6	1	114	71	18.2	25.3835	0	139	1	0	0		5.9	5.5	0.02
1765	2	34.4493	4.18	12.4	255	4.2	0.6	47	31	42	27	182	90	99	72	10	0.56	99	1	0	1	0	0	0	0	0	0	0	164.1	79.5	100	111	29.5	1	130	94	20.18	25.3836	0	121.3	1	0	1		5.5	4.7	0.16
1766	1	54.6027	5.04	17.7	225	4.5	1.4	63	70	78	55	252	174	230	32	14	0.83	104	0	0	1	0	0	1	1	1	0	1	168.3	86.7	101	104	30.6	1	127	101	23.82	27.474	1	182.4	1	0	1		6.7	8.1	0.15
1767	2	22.5671	6.83	14	324	4	0.5	47	13	11	10	180	98	69	68	12	0.65	96	0	0	0	0	0	0	0	0	0	0	169.2	66.3	83	101	23.2	0	113	77	16.83	25.3846	0	107.8	1	0	1		5.2	4.9	0.14
1768	1	47.5014	7.88	16.2	268	4.2	1.5	72	19	19	23	311	257	76	39	14	0.87	58	0	0	0	0	0	1	0	1	0	0	160.4	66.2	88	90	25.9	1	108	66	18.19	27.4773	1	98.9	0	0	0		5.3	5.7	0.2
1769	2	60.611	5.18	14.9	269	4.6	0.9	86	24	30	16	189	107	63	69	18	0.61	88	0	1	1	0	0	0	0	0	0	0	158.2	59.8	85	96	23.9	0	136	85	15.18	25.3846	0	109.7	1	0	0		6.1	5.1	0.23
1770	1	44.811	5.66	14.5	265	4.5	1.2	57	87	146	48	179	108	174	36	11	0.84	95	1	1	1	0	0	1	1	1	1	1	172.4	101.9	108	110	34.4	1	121	85	28	27.4779	1	161.4	1	0	1		5.6	6.1	0.58
1771	2	60.2986	6.11	13.2	285	4.1	0.9	90	19	16	13	228	166	102	42	11	0.52	88	0	0	0	0	0	1	0	1	0	0	154	54.4	82.5	92	22.9	0	108	74	13.81	25.386	0	69.2	0	0	0		5.4	4.5	0.09
1772	2	57.8301	6.97	12.2	295	4.3	0.7	56	27	20	9	172	94	59	66	11	0.79	102	0	0	0	0	0	0	1	1	1	0	150.3	46.9	77	89	20.8	0	98	67	11.907	25.3881	0	57.8691	0	0	0		5.8	4.5	0.04
1773	2	52.9452	4.86	14.4	191	4.3	0.9	76	17	16	18	227	135	140	64	18	0.75	96	0	0	0	0	0	0	0	0	0	0	159.7	64.2	79	83	25.1	1	125	80	16.3	25.3894	0	91.8	0	0	0		6.3	4.8	0.02
1774	2	31.8301	3.98	10.7	282	4.3	1.6	46	19	8	10	217	121	61	84	12	0.6	80	0	0	0	0	0	0	0	0	0	0	163.3	65.3	79.5	100	24.5	0	111	73	16.58	25.3905	0	92.6	0	0	1		5.4	4.6	0.05
1775	2	78.7534	4.83	9.9	146	4.3	0.5	48	25	14	14	171	106	77	50	35	1.53	85	0	0	0	0	0	0	0	0	0	0	145.4	48.6	76	86	23	0	139	62	12.34	25.3909	0	64.4	0	0	0		5.5	7.7	0.05
1776	2	44.4932	5.58	12.9	343	4.6	0.6	63	25	31	29	238	157	157	50	10	0.63	93	0	0	0	0	0	0	1	1	0	1	164	74	86	104	27.5	1	129	89	18.79	25.3919	0	115.3	1	0	1		5.4	5.7	0.43
1777	1	74.4959	6.39	14.8	173	4.5	0.8	42	21	24	17	172	95	89	59	19	0.77	164	0	1	1	1	1	0	0	0	0	0	163.2	72.6	97.5	97	27.3	1	119	81	19.95	27.4793	1	117.4	1	0	0		6.9	5.2	0.08
1778	1	53.3096	9.3	17.9	254	4.4	1.3	92	31	53	53	266	182	160	52	20	0.84	203	0	1	1	0	1	0	1	1	0	1	156.4	60.7	86	94	24.8	0	136	101	16.68	27.4794	1	107.1	1	0	1	18	11.2	3.8	0.1
1779	2	39.2	7.16	13.6	238	4.2	0.9	54	13	8	6	130	63	54	56	10	0.79	87	0	0	0	0	0	0	0	0	0	0	161.9	66.2	82	96	25.3	1	97	70	16.81	25.3927	0	79	0	0	0		4.8	3.8	0.14
1780	2	48.0685	7.49	15.3	259	4.5	1.7	52	22	14	11	226	137	111	67	9	0.61	86	0	0	1	0	0	0	0	0	0	0	153.2	53.2	77	94	22.7	0	129	90	13.51	25.3947	0	77.8	0	0	1		5.2	3.3	0.02
1781	2	56.7096	4.99	14.5	173	4.5	3.1	49	38	33	25	163	90	140	45	17	0.57	126	1	0	1	0	1	1	0	1	0	0	156.1	74.7	90	106	30.7	1	131	95	18.97	25.3949	0	149.5	1	0	0		6.4	5	0.17
1782	1	59.8329	5.96	14.7	207	4.4	1	65	26	36	227	316	236	174	45	10	1.06	95	0	0	0	0	0	0	1	1	0	1	171	76.2	94	102	26.1	1	108	84	20.94	27.4803	1	180.2	1	0	0		5.4	5.6	0.32
1783	2	77.074	6.65	13.6	235	4.4	0.6	68	42	43	18	117	50	130	41	12	0.81	110	1	1	1	1	1	1	1	1	1	0	162.2	74.7	99	101	28.4	1	116	70	18.97	25.3949	0	160.4	1	0	0		8.1	5.8	0.12
1784	1	77.611	6.44	12.9	190	5	0.8	111	31	22	15	187	122	99	45	21	0.95	95	0	0	1	0	0	0	0	0	0	0	158.4	58.5	85.5	92	23.3	0	169	82	16.08	27.4872	1	63.8	0	0	0		5.7	7.3	0.74
1785	1	39.7644	4.57	14.2	307	4.9	1.4	39	61	92	171	315	232	246	34	15	0.92	107	0	0	0	0	0	1	1	1	1	1	170	75	93	100	26	1	114	86	20.62	27.4933	1	121.4	1	1	1		5.7	6.7	0.05
1786	2	66.5068	5.2	13.9	250	4.2	0.8	69	19	18	12	119	54	112	43	15	0.65	143	0	1	1	1	1	1	1	1	1	0	156.3	59.3	87	95	24.3	0	118	67	15.06	25.3963	0	101.3	1	0	0		7.1	3.9	0.03
1787	1	48.7699	6.22	17.7	280	4.5	1.2	76	21	27	29	259	171	189	50	14	0.79	122	0	0	1	0	0	0	1	1	0	1	164	85	97.5	101	31.6	1	126	103	23.37	27.4941	1	168	1	1	1		6.5	5.5	0.09
1788	2	60.6904	5.12	13.8	300	4.1	0.9	55	29	30	28	258	182	125	51	10	0.7	97	0	0	0	0	0	0	1	1	1	0	159.6	65.6	86	94	25.8	1	114	74	16.66	25.3963	0	102.4	1	0	1		5.4	4.4	0.04
1789	2	61.7342	4.33	13	185	4	0.9	94	28	18	18	201	113	198	48	17	0.71	82	0	1	1	0	0	1	1	1	1	1	156.9	64.3	86	93	26.1	1	106	81	16.33	25.3966	0	97.2	0	0	0		5.3	3.2	0.05
1790	2	59.4521	4.55	12.7	220	3.9	0.6	57	21	22	16	138	73	127	40	12	0.77	99	1	0	0	0	0	1	0	1	0	0	163.9	69.3	91.5	98	25.8	1	120	77	17.6	25.3968	0	128.9	1	0	1		5.8	5.3	0.2
1791	2	57.7616	7.02	14.5	290	4.5	0.6	110	24	27	12	224	140	195	45	10	0.66	106	1	0	1	0	0	1	1	1	0	1	158.1	66.7	88	96	26.7	1	133	94	16.94	25.3973	0	107.9	1	0	0		6.6	5	0.08
1792	2	50.1041	5.28	15	336	4.8	0.9	48	25	17	13	222	151	71	57	12	0.88	104	0	0	1	0	0	0	0	0	0	0	156	59.1	77	95	24.3	0	121	96	15.01	25.3976	0	79.2	0	0	1		4.8	4.9	0.03
1793	2	29	4.01	13.3	247	4.2	1.2	48	17	12	10	214	130	166	51	9	0.58	79	0	0	0	0	0	0	1	1	0	1	153.9	56.5	81	98	23.9	0	108	70	14.35	25.3982	0	58.5	0	0	1		5.1	4.6	0.04
1794	2	32.4904	6.88	15.2	378	4.4	0.7	74	29	43	25	185	134	60	39	11	0.59	88	0	0	1	0	0	1	0	1	0	0	161.2	67.8	84	99	26.1	1	123	93	17.22	25.3982	0	94.4	0	0	0		5.6	6	0.19
1795	2	35.3644	6.06	13.2	281	4.5	1.7	51	19	8	10	169	90	52	69	11	0.57	78	0	0	0	0	0	0	0	0	0	0	150.3	52.4	68	97	23.2	0	111	80	13.31	25.4008	0	65.2	0	0	1		5.4	3.9	0.05
1796	2	46.8822	5.15	14	249	4.2	0.9	66	19	22	21	191	94	128	71	11	0.49	89	0	0	0	0	0	0	0	0	0	0	161.7	51.1	80	95	19.5	0	83	65	12.98	25.4012	0	71.1	0	0	1		5.2	3.4	0.11
1797	2	59.1918	3.28	12	182	4.2	0.7	62	20	14	12	192	120	49	62	13	0.52	97	0	0	0	0	0	0	0	0	0	0	156.2	51.7	79	90	21.2	0	113	80	13.1336	25.4036	0	54.3023	0	0	1		5.9	5.3	0.02
1798	2	58.3151	3.15	13.1	238	4.4	0.9	77	66	48	11	208	134	56	63	15	0.61	91	0	0	0	0	0	0	0	0	0	0	150	53.1	84	87	23.6	0	110	79	13.49	25.4049	0	88.9	0	0	0		5.6	4.1	0.08
1799	1	53.6411	5.96	15.5	86	4.5	0.9	87	34	65	67	193	143	77	35	18	0.83	140	1	1	1	1	1	1	1	1	1	0	170.4	84.7	107	100	29.3	1	145	97	23.29	27.497	1	168	1	0	1		7.4	5.4	0.19
1800	2	55.4219	6.02	13.7	174	4.4	0.9	90	25	29	80	279	190	141	61	16	0.54	127	1	0	0	0	1	0	0	0	0	0	162.8	70.3	89	103	26.5	1	108	80	17.86	25.4054	0	119.6	1	0	0		5.8	5.2	0.62
1801	2	32.537	6.76	14	274	4.3	1.3	54	20	15	15	153	37	131	90	8	0.59	79	0	0	0	0	0	0	0	0	0	0	149.9	42.9	64	83	19.1	0	110	80	10.9	25.4079	0	51.2	0	0	1		5.1	5.8	0.02
1802	2	58.4603	4.28	15	265	4.4	1.2	66	34	30	15	169	84	93	66	11	0.77	93	0	1	1	0	0	0	0	0	0	0	155.3	53.8	81	89.5	22.4	0	112	75	13.67	25.4089	0	72.5	0	0	1		5.4	4.1	0.04
1803	2	56.8795	6.23	14.1	320	4.5	1.1	119	38	45	26	209	116	65	80	16	0.65	89	0	0	0	0	0	0	1	1	1	0	161.1	56	87	95	21.6	0	110	79	14.23	25.4107	0	100.4	1	0	0		5.9	3.9	0.07
1804	1	55.9342	7.42	15.8	261	4.2	0.9	96	41	38	114	187	119	174	33	13	0.75	108	0	1	1	0	0	1	1	1	0	1	172.7	85.6	101	99	28.6	1	126	86	23.54	27.5	1	172.8	1	0	1		5.8	6.6	0.48
1805	2	24.2493	5.88	12.9	243	4.4	0.8	61	15	7	8	144	64	37	73	9	0.61	81	0	0	0	0	0	0	0	0	0	0	161	59.5	67	95	23	0	113	84	15.12	25.4118	0	71.9	0	0	1		4.7	4.1	0.05
1806	2	32.8301	5.31	13	316	4.1	0.9	46	17	18	17	169	76	115	70	11	0.71	80	0	0	0	0	0	0	0	0	0	0	155.3	61.9	81	103	25.7	1	105	75	15.73	25.412	0	44.6	0	0	1		5	5.4	0.08
1807	2	52.3671	5.81	14.3	237	4.3	1	62	36	29	14	266	177	74	74	10	0.7	94	0	0	0	0	0	0	0	0	0	0	156.7	56.9	82	95	23.2	0	102	77	14.46	25.413	0	76.6	0	0	0		5.5	4.6	0.07
1808	2	29.0658	5.4	14.2	269	4.6	0.8	66	22	18	10	153	66	86	70	8	0.72	84	0	0	0	0	0	0	0	0	0	0	163	64.1	82	102	24.1	0	98	79	16.29	25.4134	0	82.1	0	0	0		5.4	4	0.02
1809	2	43.2356	9.29	13.3	319	4.5	1.1	58	22	19	11	223	139	115	61	6	0.64	85	0	0	0	0	0	0	0	0	0	0	155.9	62.8	76	102	25.8	1	96	67	15.96	25.414	0	56.8	0	0	0		5.3	3.7	0.21
1810	2	32.2411	5.46	14.7	290	4.5	0.9	53	31	31	20	162	83	78	63	8	0.65	89	0	0	0	0	0	0	0	0	0	0	161.3	67.4	79	99	25.9	1	110	80	17.13	25.4154	0	98.8	0	1	0	8.1	5.2	3.9	0.03
1811	2	61.9288	5.71	13.7	276	3.9	0.9	84	24	21	14	197	124	42	65	14	0.78	82	0	0	0	0	0	0	0	0	0	0	152.4	56.5	87	97	24.3	0	93	61	14.36	25.4159	0	78.9	0	0	1		5.4	5.2	0.18
1812	2	77.6329	3.51	13.5	193	4.3	1.2	79	16	11	11	203	147	79	40	11	0.65	96	0	1	1	0	0	1	0	1	0	0	157.6	60	84	97	24.2	0	124	85	15.25	25.4167	0	100.2	1	0	0		5.5	5	0.02
1813	2	62.8712	6.9	13.2	378	4.5	0.9	113	49	49	70	275	192	69	69	14	1.16	91	1	1	1	0	0	0	0	0	0	0	153.2	62.2	89	93	26.5	1	148	81	15.81	25.418	0	86.1	0	0	0		6	5.8	0.42
1814	2	54.6055	6.27	12.9	255	4.5	0.7	104	23	29	15	257	195	96	43	12	0.78	94	0	0	0	0	0	1	0	1	0	0	157.7	63.1	84	100	25.3	1	126	76	16.04	25.42	0	90.4	0	0	1		6	4.5	0.07
1815	2	56.6356	7.11	13.5	184	4.3	0.9	56	25	32	17	187	124	117	40	20	0.66	95	1	0	1	0	0	1	0	1	0	0	156.7	62.3	88	96	25.3	1	136	94	15.8393	25.4243	0	90.5533	0	0	0		5.3	4.4	0.19
1816	1	34.5397	8.88	16.8	323	4.7	0.7	60	34	59	62	251	171	134	53	13	1.01	100	1	0	1	0	0	0	0	0	0	0	173.3	98	107	110	32.7	1	133	94	26.97	27.5204	1	152.6	1	1	1		5.6	9.5	0.25
1817	2	48.2658	4.16	10.1	307	4.4	1.5	58	24	19	13	173	117	59	44	11	0.59	83	0	0	0	0	0	1	0	1	0	0	154.5	54.5	77.5	92	23.2	0	125	82	13.86	25.4312	0	57.7	0	0	0		5.7	5.3	0.07
1818	2	73.6685	9.06	9.9	463	3.9	0.6	112	19	25	96	140	101	45	30	15	0.76	80	1	1	1	0	0	1	0	1	0	0	155.6	56.7	89.5	91	23.3	0	129	67	14.42	25.4321	0	76.7	0	0	0		6.3	5.2	7.75
1819	1	21.4932	5.81	16.3	216	4.6	0.6	109	19	20	26	171	99	146	43	14	0.89	94	1	0	0	0	0	0	0	0	0	0	171.3	97.6	103	112	33.3	1	115	78	26.86	27.5205	1	151.9	1	0	0		5.2	5.8	0.03
1820	2	60.0219	4.68	13.2	222	4.3	1.1	84	34	33	20	215	142	188	35	12	0.64	97	1	0	0	0	0	1	1	1	0	1	159.2	65.9	88	99	26	1	114	77	16.76	25.4325	0	116.3	1	0	0		5.3	3.7	0.1
1821	2	56.2877	6.38	11.3	303	4.1	0.7	80	26	16	8	201	137	56	53	18	0.66	86	0	0	0	0	0	0	0	0	0	0	156.9	62.4	85	98	25.3	1	107	73	15.87	25.4327	0	74.8	0	0	0		5.6	3.9	0.68
1822	1	46.3205	6.15	15	249	4.2	0.8	118	30	71	98	220	157	84	46	10	0.87	74	0	0	1	0	0	0	0	0	0	0	171.3	85.2	95	104	29	1	132	92	23.46	27.5352	1	152.1	1	0	1		5.5	6.3	1.18
1823	2	65.4877	4.92	13.4	308	4.5	0.9	87	34	37	43	199	132	112	45	12	0.56	86	0	0	0	0	0	1	0	1	0	0	153	50.8	75	90	21.7	0	101	76	12.92	25.4331	0	84	0	0	0		5.4	3	0.08
1824	1	37.874	5.22	16	358	4.5	1.1	84	41	73	54	245	165	160	48	16	1.04	117	1	0	1	0	0	0	1	1	0	1	179.1	109.7	108	114	34.2	1	126	91	30.21	27.5387	1	156.3	1	0	1		6.3	7.5	0.13
1825	2	58.9644	2.37	13.8	215	4.2	1.2	58	30	21	13	214	135	69	65	20	0.6	99	0	0	0	0	0	0	0	0	0	0	149.8	48.2	77	86	21.4	0	120	85	12.26	25.4357	0	62	0	0	0		5.6	4.4	0.02
1826	2	57.4384	5.51	13.9	408	4.6	1	99	21	21	10	217	140	79	61	11	0.72	89	0	1	1	0	0	0	1	1	1	0	154.9	59.2	83	95	24.7	0	105	70	15.06	25.4392	0	111.9	1	0	0		5.6	5.7	0.22
1827	2	64.8904	6.61	14.9	312	4.7	1.5	99	27	33	20	278	214	64	51	17	0.73	105	0	0	1	0	0	0	0	0	0	0	157.4	53.5	87	98	21.6	0	133	92	13.61	25.4393	0	112.3	1	0	0		5.8	5	0.04
1828	2	52.7342	7.27	13.6	344	4.2	0.4	69	22	27	19	186	77	258	57	7	0.62	142	1	1	1	1	1	0	1	1	1	1	167.4	82.9	96	103	29.6	1	152	82	21.09	25.4403	0	160.6	1	0	0		7.1	4.7	0.16
1829	1	64.6329	6.97	15.3	333	4.3	0.6	61	29	39	33	141	71	132	44	15	1.27	138	1	1	1	1	1	0	0	0	0	0	173.3	85.5	103	103	28.5	1	128	76	23.55	27.5439	1	164.2	1	1	0		7.1	7.5	0.1
1830	2	56.8658	6.07	14.8	281	4.8	1	81	19	17	13	236	153	205	42	12	0.71	114	1	0	1	0	0	1	1	1	0	1	160.2	73.7	94	102	28.7	1	187	113	18.75	25.441	0	118.5	1	0	0		5.4	4	0.05
1831	2	35.3425	4.62	13.6	272	4.3	1	58	14	6	7	162	78	57	73	10	0.58	86	0	0	0	0	0	0	0	0	0	0	150.7	50.9	81	90.5	22.4	0	81	64	12.95	25.442	0	56.3	0	0	1		5.6	3.6	0.02
1832	2	36.6274	5.66	14.2	221	4.1	0.8	71	26	23	38	226	134	146	63	6	0.53	77	0	0	0	0	0	0	0	0	0	0	153.5	47.4	71	91	20.1	0	86	58	12.06	25.443	0	45.2	0	0	0		5.1	4	0.18
1833	2	75.8356	4.29	12.9	178	4.1	0.6	79	28	18	11	214	125	179	53	15	0.76	96	1	1	1	0	0	0	1	1	1	1	148.8	56.4	92	95	25.4	1	120	63	14.35	25.4433	0	86.8	0	0	0		6.2	6.2	0.05
1834	2	60.063	6	14.4	217	4.1	0.9	60	18	16	11	149	80	107	48	13	0.7	105	0	0	1	0	0	1	0	1	0	0	163.9	66.5	84	96	24.7	0	139	91	16.92	25.4436	0	99.7	0	0	0		5.9	5.3	0.06
1835	2	75.0411	6.56	14.3	193	4	0.5	108	23	23	18	198	121	155	46	16	0.55	113	1	0	0	0	0	1	1	1	0	1	153.9	61.9	100	97	26.1	1	121	77	15.75	25.4443	0	107.1	1	0	0		6.5	6.1	0.12
1836	2	37.6932	5.82	13.4	290	4.3	1.3	56	22	18	11	166	77	85	72	10	0.61	88	1	0	0	0	0	0	0	0	0	0	160	68.3	88	105	26.7	1	107	81	17.38	25.4466	0	103.9	1	0	1		5.1	4.9	0.08
1837	1	73.1808	7.71	17.1	185	4.3	0.9	57	42	52	67	210	115	261	43	13	0.99	108	0	0	1	0	0	0	1	1	0	1	166.4	76.2	96	95.5	27.7	1	149	78	20.99	27.5459	1	151.9	1	0	1		5.8	8.4	0.02
1838	2	33.526	4.6	14.6	255	4.2	0.8	56	18	23	9	205	136	78	53	6	0.79	99	1	0	0	0	0	0	0	0	0	0	169.3	83.9	101	112	29.3	1	133	82	21.35	25.447	0	111.4	1	0	0		5.4	5.5	0.06
1839	2	38.5945	3.31	13.9	210	4.3	0.3	69	46	32	26	147	89	65	45	7	0.55	78	0	0	0	0	0	1	0	1	0	0	154.1	50.3	79	89	21.2	0	101	81	12.8	25.4473	0	62.1	0	0	1		5.2	5.3	2
1840	1	67.0849	7.24	15.5	257	4.4	0.8	61	28	34	46	294	198	219	52	15	0.88	90	0	1	1	0	0	0	1	1	1	1	168.7	70.6	97	97	24.8	0	116	81	19.45	27.5496	1	132.4	1	0	0		6.2	5.8	0.2
1841	2	77.1616	2.65	13.9	222	4.4	0.8	79	25	15	16	218	137	104	60	17	0.79	118	0	1	1	0	0	0	1	1	1	0	153.9	53.6	80	90	22.6	0	141	85	13.64	25.4478	0	61.7	0	0	0		5.9	5.4	0.08
1842	2	38.1726	7	14.6	274	4.4	1.3	48	22	24	21	170	86	103	63	12	0.53	92	0	0	1	0	0	0	0	0	0	0	163.3	65.7	70	91	24.6	0	127	110	16.72	25.449	0	99.1	0	0	0		5.3	4.2	0.07
1843	2	52.2055	4.92	12.9	287	4.1	1.8	67	21	15	5	205	130	45	66	11	0.49	90	0	0	1	0	0	0	0	0	0	0	153.7	54.3	73	91	22.9	0	131	92	13.82	25.4512	0	72.9	0	0	0		5.1	4.2	0.16
1844	2	56.4411	6.81	11.9	312	4.2	0.7	60	22	14	14	177	110	99	47	16	0.75	98	0	0	0	0	0	1	0	1	0	0	160.9	58.7	86	92	22.6	0	110	67	14.94	25.4514	0	78.2	0	0	0		5.8	4.7	0.02
1845	2	46.6521	5.27	13.7	264	4.3	0.6	51	19	10	16	207	115	80	76	8	0.61	84	0	0	0	0	0	0	0	0	0	0	157	54.1	73.5	91	21.9	0	109	83	13.77	25.4529	0	71.7	0	0	1		5.4	3.9	0.03
1846	2	45.7753	4.15	11.4	294	4.1	0.6	45	33	14	9	209	125	46	75	10	0.7	83	1	0	0	0	0	0	0	0	0	0	156.6	62.5	93	97	25.4	1	119	84	15.91	25.456	0	59.6	0	0	1		5.4	3.4	0.28
1847	2	31.8329	6.61	14.1	327	4.4	1.1	60	13	13	15	218	151	121	43	12	0.75	89	0	0	0	0	0	1	0	1	0	0	157.2	70	87	106	28.4	1	112	83	17.82	25.4571	0	95.3	0	1	0		5.5	7.3	0.1
1848	2	52.7205	7.97	13	261	3.7	0.6	59	31	18	20	175	86	54	78	13	0.56	79	0	0	0	0	0	0	0	0	0	0	155.5	53.1	73	90	22	0	119	75	13.52	25.4614	0	67.6	0	0	0		5.5	3.1	0.04
1849	2	62.0082	5.09	13.7	219	4.4	1.2	77	33	20	34	280	183	98	77	11	0.62	233	0	0	0	0	1	0	0	0	0	0	150.9	49.6	76	86	21.8	0	129	81	12.63	25.4637	0	77.5	0	0	1		11.6	3.3	0.11
1850	2	46.5781	8.16	13.6	294	4.4	2.6	76	21	22	25	189	137	72	38	16	0.76	97	0	0	0	0	0	1	0	1	0	0	156.4	59.3	86	96	24.4	0	116	71	15.1	25.4637	0	81	0	0	0		5.1	5.5	0.04
1851	2	26.2082	4.65	13.9	192	4.8	1.3	58	17	14	7	180	107	28	67	12	0.68	82	0	0	0	0	0	0	0	0	0	0	165.1	62.4	84	97	22.9	0	114	80	15.89	25.4647	0	75.4	0	0	1		5.3	5	0.38
1852	2	24.674	5.6	13.6	265	4.7	0.8	56	18	10	12	170	85	37	78	11	0.6	84	0	0	0	0	0	0	0	0	0	0	158	51.6	74.5	94	20.7	0	94	59	13.14	25.4651	0	33.8	0	0	0		5.2	5.4	0.02
1853	2	40.6603	6.41	13.4	219	4.3	1	49	27	21	28	172	96	45	67	13	0.53	79	0	0	0	0	0	0	0	0	0	0	154.7	52.3	73	99	21.9	0	108	77	13.32	25.4685	0	40.5	0	0	0		4.9	4.3	0.08
1854	2	21.4384	7.2	13.8	230	3.9	0.5	33	30	31	12	186	90	85	79	10	0.54	89	0	0	0	0	0	0	0	0	0	0	167.9	66	83	105	23.4	0	97	69	16.81	25.4697	0	77.8	0	0	0		5.5	3.9	0.09
1855	2	54.2822	4.72	14.2	258	4.4	1.1	66	33	44	31	190	117	153	42	9	0.61	110	0	1	1	0	0	1	1	1	1	1	156.6	64.9	82	96	26.5	1	145	96	16.53	25.47	0	116.9	1	0	0		6.1	3.3	0.15
1856	2	61.2493	7.27	13.2	270	4.2	0.8	74	32	34	36	206	137	70	55	9	0.66	95	0	0	0	0	0	0	0	0	0	0	156.9	59.4	81.5	94	24.1	0	99	65	15.13	25.4714	0	103.8	1	0	0	6.8	5.9	5.3	0.65
1857	2	66.7096	8.01	15	244	4.8	1.4	87	28	29	30	169	77	241	44	18	0.94	113	0	1	1	1	1	1	1	1	1	1	151	47.7	73	86	20.9	0	151	83	12.15	25.4717	0	93.4	0	0	0		6.6	4.7	0.1
1858	2	52.3753	4.09	13.9	216	4.2	0.9	89	32	25	19	221	152	76	54	11	0.69	85	0	0	0	0	0	0	0	0	0	0	153.2	61.4	86	92	26.2	1	125	81	15.64	25.4723	0	111.9	1	0	0		5.5	4.4	0.17
1859	2	73.8521	5.21	13	253	4.4	0.5	79	26	27	29	216		489	36	17	0.71	109	0	1	1	0	0	1	1	1	1	1	154.3	57	81	88	24	0	131	75	14.52	25.4737	0	77.6	0	0	0		6.2	5.4	0.07
1860	2	45.2137	5.45	12.9	299	4.1	0.6	49	18	23	49	176	82	136	67	13	0.68	83	0	0	0	0	0	0	0	0	0	0	158	61.2	77	95	24.5	0	102	72	15.59	25.4739	0	89.2	0	0	0		5.3	4.4	0.04
1861	2	59.411	4.24	12.8	280	4.4	0.8	87	22	16	17	327	235	105	71	17	0.66	140	0	1	1	1	1	0	1	1	1	0	156.8	62.1	87	98	25.3	1	112	72	15.82	25.475	0	108.5	1	0	1		6.8	5.2	0.2
1862	2	46.8	5.11	12.1	253	4.1	0.9	42	16	12	12	163	69	54	83	10	0.59	83	0	0	0	0	0	0	0	0	0	0	152.4	50.4	68	90	21.7	0	98	73	12.84	25.4762	0	50.1	0	0	0		5.4	3.9	0.05
1863	2	33.9151	6.56	13.4	314	4.3	1.3	44	13	8	6	176	78	59	86	9	0.65	89	0	0	0	0	0	0	0	0	0	0	156.9	61.7	75	99	25.1	1	121	80	15.72	25.4781	0	57.8	0	0	1		5.1	2.6	0.02
1864	2	45.211	6.91	15.5	327	4.6	1.8	68	30	29	20	272	171	287	44	8	0.87	106	0	0	0	0	0	1	1	1	0	1	159.2	63.5	86	97	25.1	1	120	85	16.18	25.4803	0	104.5	1	0	0		5.8	5.4	0.11
1865	2	40.6301	8.97	11.7	332	4.2	0.6	60	17	7	11	177	106	107	50	13	0.49	75	0	0	0	0	0	0	0	0	0	0	161.1	53.8	76	91	20.7	0	98	69	13.71	25.4833	0	77.7	0	0	0		5.2	5.4	0.18
1866	2	54.4603	9.16	14.1	273	4.5	0.9	83	25	19	22	283	189	116	71	12	0.74	119	0	0	0	0	0	0	1	1	1	0	161	56.9	80	97	22	0	136	89	14.5	25.4833	0	98.1	0	0	0		5.5	4.6	0.12
1867	2	65.0849	5.28	15.2	255	4.3	1	82	18	17	40	331	233	151	68	10	0.74	94	0	1	1	0	0	0	1	1	1	1	154.4	55.8	78	91	23.4	0	134	88	14.22	25.4839	0	79.4	0	0	0		5.6	6.2	0.03
1868	2	47.1205	5.13	12.2	234	4.2	0.6	46	21	19	10	194	109	48	75	11	0.59	94	1	0	0	0	0	0	0	0	0	0	157.9	70.2	88	104	28.1	1	121	76	17.89	25.4843	0	124.9	1	0	0		5.2	4.1	0.03
1869	1	57.1808	5.84	16.2	243	4.4	0.7	76	24	25	26	200	128	64	59	10	0.67	92	0	0	0	0	0	0	0	0	0	0	151.9	49.9	76	90	21.6	0	119	72	13.75	27.5551	1	79.8	0	1	1		5.5	4.4	0.02
1870	2	40.9479	5.35	13.9	273	4.9	1.4	42	15	14	13	254	178	66	63	12	0.75	72	0	0	0	0	0	0	0	0	0	0	160.2	59.8	78	96	23.3	0	115	89	15.24	25.4849	0	96	0	0	0		5.5	4.9	0.07
1871	2	61.7068	3.18	12	298	4.3	1.8	67	17	15	10	174	94	80	64	13	0.53	93	1	0	0	0	0	0	0	0	0	0	160.9	60.7	88	99	23.4	0	117	73	15.47	25.486	0	99.6	0	0	0		5.4	2.9	0.02
1872	1	59.989	6.11	16	269	4.6	1.1	74	38	37	176	242	123	108	97	17	1.14	91	1	1	1	0	0	0	0	0	0	0	171.1	96.4	110	109	32.9	1	100	75	26.57	27.5622	1	97.2	0	0	1		5.8	7.3	0.29
1873	2	49.6712	8.68	15.1	410	4.5	0.8	69	71	123	52	213	143	152	40	13	0.93	76	0	0	0	0	0	1	1	1	0	1	151	65.6	76.5	96	28.8	1	102	76	16.72	25.4878	0	115.3	1	0	0		6.3	8.6	0.18
1874	2	53.1918	3.66	15.6	219	4.8	0.9	83	27	20	22	259	184	59	63	12	0.67	87	0	0	1	0	0	0	0	0	0	0	154.6	52.1	72	92	21.8	0	130	94	13.28	25.4894	0	78.9	0	0	1		5.1	5.3	0.02
1875	2	26.8548	7.74	13.4	348	4.1	0.7	55	13	9	12	199	128	91	53	12	0.5	85	0	0	0	0	0	0	0	0	0	0	161.1	59	76	98	22.7	0	103	75	15.04	25.4915	0	55.9	0	0	0		5.5	4.1	0.17
1876	1	48.7479	5.46	15	222	4.3	1.1	58	50	59	73	141	55	217	43	14	0.96	128	1	1	1	0	1	0	1	1	0	1	171.1	98.9	107	113	33.8	1	120	73	27.26	27.5632	1	110.5	1	0	1		6.3	6.3	0.17
1877	2	60.4466	5.24	12.9	171	4.3	1.3	55	30	27	15	172	99	57	62	11	0.63	81	0	0	0	0	0	0	1	1	1	0	151.4	57.5	87	93	25.1	1	112	73	14.66	25.4957	0	115.2	1	0	0		6.7	4.2	0.04
1878	2	58.6247	5.68	13.9	266	4.4	0.9	67	36	43	21	198	131	94	48	11	0.73	85	1	0	0	0	0	1	0	1	0	0	160	61.5	89	99	24	0	94	67	15.68	25.4959	0	99.2	0	0	0		5.6	3.8	0.21
1879	1	73.0521	9.67	13.5	409	3.9	0.7	69	49	52	32	151	88	93	44	20	1.03	91	0	0	1	0	0	0	0	0	0	0	161.3	62.9	90	91	24.2	0	138	92	17.34	27.5676	1	141.7	1	0	0		6.3	5.1	2.76
1880	2	46.0384	4.63	15.7	278	4.5	1.1	41	18	12	13	160	79	65	68	10	0.72	76	0	0	0	0	0	0	0	0	0	0	155.2	52.4	85	95	21.8	0	102	82	13.36	25.4962	0	50.6	0	0	1		4.9	4.3	0.04
1881	2	58.674	4.53	13.1	211	4.2	0.4	135	23	16	22	181	95	59	74	13	0.6	100	0	0	0	0	0	0	0	0	0	0	160.6	59.3	85	93	22.9	0	120	77	15.12	25.4975	0	74.4	0	0	0		5.4	3.7	0.02
1882	1	33.8438	7.78	16.3	253	4	0.9	57	55	86	73	228	160	144	39	12	0.93	104	1	1	1	0	0	1	1	1	1	0	174.2	118.4	115.5	120	39.1	1	124	79	32.64	27.5676	1	152.6	1	0	0		6.4	8.6	0.85
1883	2	59.0274	5.6	13.3	265	4.5	1.3	55	51	48	64	222	138	196	45	10	0.68	127	0	1	1	1	1	1	1	1	1	1	150.7	53.1	85	90	23.3	0	124	84	13.54	25.4991	0	74.4	0	0	0		6.7	4.4	0.13
1884	2	48.2055	4.69	13.9	200	4.3	1.2	35	23	12	11	147	66	62	69	14	0.54	97	0	0	0	0	0	0	0	0	0	0	156.1	50	83.5	86.5	20.5	0	116	84	12.75	25.5	0	87.7	0	0	1		5.5	3.9	0.04
1885	2	59.0986	3.33	13.5	259	4.4	1.5	78	25	25	27	190	122	69	54	17	0.59	90	1	1	1	0	0	0	0	0	0	0	156.6	62	91	96.5	25.4	1	135	85	15.81	25.5	0	111.3	1	0	0		5.4	4.1	0.05
1886	2	51.6822	4.88	15.2	227	4.1	1.1	68	28	29	12	235	174	41	53	17	0.75	73	1	0	0	0	0	0	0	0	0	0	155.6	66.9	88	97	27.5	1	117	70	17.06	25.5007	0	108.9	1	0	0		5.2	4.9	0.03
1887	2	67.2247	5.63	15.6	275	4.1	0.9	81	27	25	16	306	221	184	48	16	0.79	92	1	0	0	0	0	1	1	1	1	1	159.4	67.8	89	97	26.8	1	121	80	17.29	25.5015	0	127.4	1	0	0		5.6	5.7	0.27
1888	2	43.6767	7.28	16	322	4.4	1.2	70	27	25	41	226	130	230	50	10	0.77	97	1	0	1	0	0	0	1	1	0	1	162.8	73.7	98	106	27.7	1	149	96	18.7957	25.503	0	119.187	1	1	1		5.6	5.5	0.19
1889	2	52.6877	4.97	14	211	4.3	0.7	68	24	22	42	198	129	76	54	13	0.59	91	1	0	0	0	0	0	0	0	0	0	159	71.2	90	103	28.2	1	120	74	18.16	25.5056	0	90.9	0	0	0		5.5	5.5	0.31
1890	2	56.9233	4.46	13	398	4.1	0.7	71	31	28	17	252	173	118	55	13	0.74	85	0	0	0	0	0	0	0	0	0	0	159	62.3	77	97	24.6	0	106	76	15.89	25.5056	0	91.8	0	0	0		5.6	4.8	0.07
1891	2	48.5753	3.11	12.4	234	4.4	2.1	77	33	25	21	207	90	92	99	8	0.56	88	0	0	0	0	0	0	1	1	1	0	152.2	47.4	77	92	20.5	0	109	75	12.09	25.5063	0	58.6	0	0	0		5.2	3.4	0.03
1892	2	55.2301	5.81	13	432	4.1	0.7	92	37	42	22	240	163	100	57	17	0.68	86	0	0	0	0	0	0	0	0	0	0	153	49.2	78	90	21	0	110	67	12.5492	25.5064	0	56.952	0	0	0		5.9	4.8	0.09
1893	2	31.0219	5.26	12.7	230	4.3	1	47	23	6	11	203	130	53	62	13	0.55	71	0	0	0	0	0	0	0	0	0	0	156.4	48.3	70	87	19.7	0	91	61	12.32	25.5072	0	60.4	0	0	0		5.5	3.8	0.07
1894	2	53.0301	7.67	14.1	279	4	0.7	74	20	18	16	208	133	100	55	13	0.64	76	0	0	0	0	0	0	0	0	0	0	154.8	67	79	100	28	1	110	75	17.09	25.5075	0	100.7	1	0	0		5.3	3.7	0.02
1895	2	48.1562	5.23	13.7	266	4.4	0.6	56	22	17	6	218	140	86	61	12	0.71	87	0	0	0	0	0	0	0	0	0	0	158.8	60.1	79	93	24.1	0	102	75	15.33	25.5075	0	108.2	1	0	0		5.4	4.2	0.02
1896	2	33.0219	3.93	12.4	272	4.3	1	43	19	13	15	188	89	58	87	8	0.53	98	0	0	0	0	0	0	0	0	0	0	153.8	50.1	74	92	21.2	0	83	51	12.78	25.509	0	65.9	0	0	1		5.4	3.9	0.02
1897	2	60.8219	4.42	14.4	316	4.3	1	99	36	38	24	210	122	129	62	15	0.62	163	0	1	1	1	1	0	1	1	1	0	150.8	52.6	78	90	23.1	0	112	81	13.42	25.5133	0	99.1	0	0	0		7.7	4.5	0.08
1898	2	33.4712	9.95	13.5	409	4.1	0.8	82	25	29	87	174	102	163	39	8	0.72	92	1	0	0	0	0	1	1	1	0	1	168.2	82.7	91	107	29.2	1	113	79	21.1	25.5139	0	117.2	1	0	1		5.2	5	0.17
1899	2	69.6767	4.21	12.7	194	4.1	1.2	35	21	17	16	298	207	116	68	9	0.81	85	0	0	0	0	0	0	0	0	0	0	157.7	45.5	76	90	18.3	0	86	55	11.61	25.5165	0	83.7	0	0	0		5.6	4.6	0.02
1900	2	46.7699	4.8	12.4	181	3.9	0.3	43	15	12	35	238		635	43	20	0.6	102	1	1	1	1	1	1	1	1	0	1	153.5	62.9	92	99	26.7	1	116	82	16.05	25.5167	0	42	0	0	1		6	5	0.06
1901	2	54.5452	4.69	14.3	220	4.5	0.8	71	31	53	20	107	50	62	45	9	0.54	124	1	0	0	1	1	1	0	1	0	0	160.3	65.4	92.5	95	25.5	1	106	65	16.69	25.5199	0	126.3	1	0	0		7.2	3.4	0.02
1902	1	50.5123	3.73	14.7	216	4.6	1.9	88	56	85	44	257	195	68	48	15	0.75	83	1	0	0	0	0	0	1	1	1	0	178.3	99.2	114	109	31.2	1	130	79	27.35	27.5706	1	258.8	1	0	1		5.7	3.2	0.23
1903	2	41.2	7.88	14.7	306	4.1	1	43	17	15	16	208	128	115	57	10	0.9	85	0	0	0	0	0	0	0	0	0	0	165.4	72.1	82	101	26.4	1	106	88	18.4	25.5201	0	113.5	1	0	1		5.1	4	0.18
1904	1	38.0521	6	14.4	328	4.4	1.3	56	35	37	40	241	159	150	52	9	0.88	104	1	0	0	0	0	0	1	1	0	1	185.2	107.7	110	122.5	31.4	1	135	83	29.71	27.5859	1	188.2	1	0	1		5.6	7.4	0.31
1905	2	19.1671	8.12	15	259	4.2	0.8	58	21	27	25	164	82	121	58	11	0.72	84	1	0	0	0	0	0	0	0	0	0	168.9	79.7	97	107	27.9	1	107	75	20.34	25.5207	0	92.2	0	0	1		5.3	7.2	0.02
1906	2	54.5233	6.83	14.7	287	4.3	1.6	91	24	38	61	276	170	74	91	10	0.65	93	0	0	0	0	0	0	0	0	0	0	155.4	57.6	77	93	24	0	115	81	14.7	25.5208	0	109.3	1	0	0		5.8	5.8	0.08
1907	2	66.9616	2.77	12.9	175	4.6	0.5	70	31	21	47	221	112	86	92	12	0.76	86	0	0	0	0	0	0	1	1	1	0	152.8	59.4	85	93	25.4	1	105	74	15.16	25.5219	0	87.9	0	0	0		5.4	3.6	0.18
1908	2	60.5562	4.71	12.9	260	4.1	0.6	71	23	21	20	180	100	133	53	10	0.65	110	0	1	1	1	1	0	0	0	0	0	152.8	61.2	86	90.5	26.1	1	110	78	15.62	25.5229	0	104.5	1	0	0		6.4	4	0.06
1909	2	49.4219	4.57	13.5	222	4	0.6	44	17	15	9	149	86	63	50	11	0.62	91	1	0	0	0	0	0	0	0	0	0	162.1	68.8	101	104	26.2	1	107	80	17.56	25.5233	0	80.8	0	0	0		5.4	4.3	0.09
1910	2	59.1397	5.54	12.4	330	4	1.4	98	18	14	9	179	110	33	62	14	0.57	73	1	0	0	0	0	0	0	0	0	0	155.5	55.4	89	99	22.9	0	88	62	14.14	25.5235	0	74.1	0	0	0		5.5	2.9	0.09
1911	2	56.8877	3.43	12.8	167	4.5	1.1	62	20	18	21	220	151	122	45	15	0.7	116	0	0	0	0	0	1	0	1	0	0	156.6	54.3	80	93	22.1	0	117	84	13.86	25.5249	0	83.7	0	0	0		5.2	5.1	0.13
1912	2	67.2466	8.02	15.7	263	4.2	1	119	150	193	288	222	144	155	47	12	0.63	102	0	0	0	0	0	1	1	1	1	1	155.3	60.8	82.5	94	25.2	1	121	71	15.52	25.5263	0	119.3	1	0	0		5.7	5.8	0.3
1913	2	28.4055	6.34	13.8	342	4.5	0.8	47	17	10	10	191	101	133	63	9	0.54	82	0	0	0	0	0	0	0	0	0	0	155.5	53	74	98	21.9	0	102	82	13.53	25.5283	0	56.6	0	0	1		4.9	3.4	0.03
1914	2	61.9918	5.31	13.9	268	4.4	1	107	23	14	13	185	128	69	43	14	0.69	90	0	0	0	0	0	1	0	1	0	0	156.7	53	84	93	21.6	0	111	84	13.53	25.5283	0	91	0	0	0		5.2	3.8	0.07
1915	2	52.8301	7.27	12.5	254	4.2	0.7	58	19	13	14	195	107	167	55	21	1.26	81	0	0	0	0	0	0	1	1	0	1	157.4	52.8	82	90	21.3	0	99	78	13.48	25.5303	0	71.8	0	0	0		5.4	6.1	0.13
1916	2	69.3945	3.21	14.5	201	4.2	0.9	54	19	11	10	206	126	50	70	14	0.65	103	0	0	0	0	0	0	0	0	0	0	162.4	66	87	103	25	1	114	76	16.85	25.5303	0	150.3	1	0	0		6.1	5.1	0.04
1917	2	51.4	4.02	11.9	222	4.4	1.2	71	17	12	9	180	112	47	59	18	0.61	82	0	1	1	0	0	0	0	0	0	0	156.2	51.7	74	91	21.2	0	96	74	13.2	25.5319	0	80.2	0	0	0		5.8	5.7	0.02
1918	2	61.0219	4.25	12.6	328	4.4	0.8	146	51	52	15	282	211	121	47	15	0.61	96	1	0	0	0	0	1	0	1	0	0	155.9	53.5	88	93	22	0	108	81	13.66	25.5327	0	85.7	0	0	0		5.3	4.2	0.09
1919	2	59.7863	8.22	14.8	180	4.3	0.7	97	21	23	17	195	122	115	50	14	0.59	94	0	1	1	0	0	0	0	0	0	0	158.4	60	81	93	24	0	113	87	15.32	25.5333	0	92.9	0	0	0		5.8	4.3	2.12
1920	1	32.9863	7.05	15.3	311	4.4	0.8	66	29	39	16	160	95	130	39	13	0.98	91	1	0	0	0	0	1	0	1	0	0	167.8	81.3	103	104	28.9	1	109	82	22.43	27.5892	1	118.8	1	0	1		5	5	0.08
1921	2	33.5041	7.2	14.3	212	4.6	1.2	72	27	16	8	174	88	49	76	12	0.66	69	0	0	0	0	0	0	0	0	0	0	158.4	52.4	68	90	21	0	98	59	13.38	25.5344	0	60.7	0	0	1		5.2	4.4	0.08
1922	2	59.1753	5.82	11.6	274	4	0.5	89	28	22	18	169	106	58	51	15	0.53	83	0	0	0	0	0	0	0	0	0	0	146.5	49.5	67	90	23.1	0	117	77	12.64	25.5354	0	61.9	0	0	0		5.6	3.2	0.04
1923	2	33.663	7.83	14.1	290	4.1	1	47	20	15	17	183	111	60	60	15	0.77	70	0	0	0	0	0	0	0	0	0	0	163.5	67.9	84	99	25.4	1	102	61	17.34	25.5376	0	87.8	0	0	0		5	4	0.07
1924	2	54.4877	5.1	13.5	267	4.2	0.8	74	28	31	16	201	141	68	46	12	0.63	96	0	0	0	0	0	1	0	1	0	0	157.6	63.2	76	95	25.4	1	104	71	16.14	25.538	0	103.5	1	0	0		6.1	4.6	0.1
1925	2	71.3808	5.82	13.5	200	4.2	0.6	107	44	46	19	132	64	72	54	18	0.68	58	0	1	1	1	1	0	0	0	0	0	148.3	53.8	83	87.5	24.5	0	122	73	13.74	25.539	0	116.1	1	0	0		6.9	4.6	0.02
1926	2	45.989	6.04	12.8	331	4.2	1	41	20	13	15	160	82	110	56	14	0.74	95	0	0	0	0	0	0	0	0	0	0	161.6	63.9	80	98	24.5	0	116	73	16.32	25.5399	0	85.9	0	0	0		5.4	4.5	0.09
1927	2	52.5014	5.41	13	207	4.4	1.9	95	32	26	19	212	136	72	62	13	0.57	83	0	0	1	0	0	0	0	0	0	0	164.5	60.1	77	97	22.2	0	136	100	15.35	25.5408	0	106.2	1	0	0		5.3	5.1	0.03
1928	1	60.1753	6.21	15.8	276	4.5	1.1	86	25	28	32	243	157	96	67	19	0.81	114	0	0	0	0	0	0	0	0	0	0	161.7	58.5	81	89	22.3	0	138	78	16.14	27.5897	1	101.4	1	0	1		6.6	5.2	0.06
1929	1	39.6219	4.76	16.6	241	4.3	1.2	101	71	108	100	194	121	154	42	9	1.02	81	1	0	1	0	0	0	1	1	0	1	170.9	97.6	105	111	33.4	1	135	93	26.93	27.5922	1	170.7	1	0	0		5.4	6.8	0.21
1930	2	38.0877	4.86	14.1	421	4.3	0.7	52	22	15	12	222	126	95	77	10	0.61	93	0	0	0	0	0	0	0	0	0	0	160.9	55.4	81	91.5	21.4	0	116	81	14.15	25.5415	0	73.4	0	0	1		5	5.1	0.16
1931	2	61.5616	5.61	13.2	243	4.2	0.7	83	35	28	34	188	118	48	60	17	0.65	70	1	0	0	0	0	0	1	1	1	0	158	60.8	90	101	24.4	0	100	70	15.53	25.5428	0	91	0	0	0		5.6	4.7	0.1
1932	2	61.4822	6.52	14.6	251	4.3	1	75	27	30	20	241	167	116	51	15	0.56	107	0	0	0	0	0	0	0	0	0	0	156.7	60.8	85	95	24.8	0	120	78	15.53	25.5428	0	108.7	1	0	0		6.2	5.8	0.22
1933	2	54.4548	6.09	13.6	210	4	0.6	68	19	15	31	187	112	74	60	12	0.62	89	0	0	0	0	0	0	0	0	0	0	157.1	58.8	84	100	23.8	0	99	69	15.02	25.5442	0	100.4	1	0	1	8.5	5.5	4.1	0.08
1934	2	59.8301	5.32	15.1	293	4.2	0.8	74	25	19	13	185	116	59	57	14	0.55	86	0	0	1	0	0	0	0	0	0	0	157.4	60.6	85	96	24.5	0	120	93	15.48	25.5446	0	73.3	0	0	0		5.7	4.5	0.11
1935	2	63.0575	4.68	15.1	217	4.2	0.9	71	26	20	15	199	133	48	56	17	0.69	93	0	1	1	0	0	0	0	0	0	0	159.8	55	80	100	21.5	0	106	80	14.05	25.5455	0	68.3	0	0	0		5.3	4.8	0.11
1936	1	75.8904	5.61	12.8	236	4.5	0.7	54	21	16	13	149	75	161	42	26	1.87	110	0	1	1	1	1	0	1	1	0	1	161.2	64.5	91.5	93	24.9	0	121	69	17.8	27.5969	1	136.3	1	0	0		7.4	9.5	0.23
1937	2	57.2274	7.69	13.9	332	4.4	0.9	58	34	49	40	198	114	194	45	14	0.73	80	1	0	0	0	0	1	1	1	0	1	160	68.7	90	103	26.8	1	127	84	17.55	25.5459	0	135.6	1	0	0		5.7	5.3	0.07
1938	1	66.811	6.48	15.6	210	4.5	1.7	97	46	66	41	187	120	75	52	13	0.86	141	0	1	1	0	1	0	0	0	0	0	165.6	76.5	91	104	27.8	1	114	74	21.12	27.6078	1	130.7	1	0	1		7.3	3.7	0.28
1939	2	36.9342	5.24	9.4	410	4.3	0.5	77	15	13	17	168	93	111	53	8	0.63	104	1	0	0	0	0	0	0	0	0	0	159.6	69.6	88	100	27.2	1	102	68	17.78	25.546	0	73.5	0	0	1		6.2	5.1	0.12
1940	2	59.4575	6.58	14.9	312	4.4	1	53	20	11	26	164	102	83	45	10	0.77	80	0	0	1	0	0	1	0	1	0	0	155.5	58.6	83	91	24.1	0	125	91	14.97	25.5461	0	96.8	0	0	1		5.4	4.2	0.02
1941	2	81.9534	5.91	11.5	306	4	0.6	84	21	8	9	132	68	97	45	22	1.57	90	0	0	0	0	0	1	0	1	0	0	153.6	47.6	73	87	20.2	0	118	78	12.16	25.5462	0	68.7	0	0	1		5.7	8.3	0.23
1942	2	77.2164	5.89	15.4	191	4.5	1.2	71	28	18	21	120	42	143	49	14	0.9	152	0	1	1	1	1	1	1	1	1	0	156.5	50.3	76	89.5	20.5	0	144	88	12.85	25.5467	0	100.4	1	0	0		6.3	5.1	0.03
1943	1	71.2712	5.31	15.2	233	4.2	1.1	56	30	24	13	227	139	60	76	17	0.85	85	0	0	0	0	0	0	0	0	0	0	168.2	74.2	99	102	26.2	1	118	74	20.49	27.6146	1	143.5	1	0	1		5.3	5	0.04
1944	1	35.5534	7.08	15.8	222	4.7	0.7	95	25	28	19	191	98	284	36	11	0.68	99	1	0	0	1	1	1	1	1	0	1	175.9	99.7	105	106	32.2	1	120	86	27.54	27.6229	1	142.9	1	0	1		5.7	5.7	0.29
1945	2	59.6438	7.17	13.8	306	4.6	0.8	109	15	14	11	157	79	95	59	7	0.62	120	0	0	0	1	1	0	1	1	1	0	162.3	60.2	82	101	22.9	0	106	67	15.38	25.5482	0	97.8	0	0	0		6.1	3.7	0.02
1946	2	34.6466	6.04	14.8	200	4.5	1.7	63	19	12	11	197	118	55	68	14	0.68	76	0	0	0	0	0	0	0	0	0	0	165.2	61.1	83	98	22.4	0	107	71	15.61	25.5483	0	106.5	1	0	1		5.2	5.2	0.3
1947	2	49.7068	6.69	13.4	192	4.2	0.8	63	27	20	23	175	89	53	75	15	0.63	56	0	1	1	0	0	0	0	0	0	0	156.3	53.5	78	95	21.9	0	128	94	13.67	25.5514	0	58.7	0	0	0		4.9	4.8	0.04
1948	2	63.7041	4.58	12.4	183	4.2	1.5	39	22	20	20	181	94	38	79	13	0.79	87	1	1	1	0	0	0	0	0	0	0	157	64.1	93	95	26	1	109	72	16.38	25.5538	0	114.7	1	0	0		5.2	5.1	0.07
1949	2	51.9699	5.49	13.6	251	4.3	1.5	104	32	30	15	208	123	180	49	15	0.73	108	0	0	0	0	0	1	1	1	0	1	165.6	65.9	83	97	23.9	0	114	81	16.84	25.5539	0	93.2	0	0	1		5.5	6.5	0.22
1950	2	23.4082	5.48	12.2	220	4.2	0.7	78	18	12	12	119	55	136	37	9	0.68	89	0	0	0	0	0	1	0	1	0	0	161.8	61.5	73	92	23.4	0	93	56	15.7157	25.554	0	64.3885	0	1	0		5.2	4.5	0.09
1951	2	52.0192	5.51	13	315	4.2	0.5	83	20	18	9	199	134	80	49	17	0.71	89	0	0	0	0	0	1	0	1	0	0	151.5	54.9	78	94	23.8	0	110	83	14.03	25.5556	0	93.9	0	0	0		5.8	5.2	0.02
1952	2	50.6356	5.43	13.9	238	4.3	1	68	21	17	15	183	110	53	62	12	0.52	93	1	0	0	0	0	0	0	0	0	0	154	54	90	98	22.8	0	116	70	13.8	25.5556	0	96.6	0	0	0		5	5.1	0.04
1953	1	72.7479	7.01	14.6	265	4.5	1.3	61	36	33	32	182	114	114	45	19	1.09	97	1	0	0	1	1	0	0	0	0	0	171.8	92.3	111	102	31.2	1	110	73	25.502	27.6294	1	204.773	1	1	0		6.5	5.5	0.2
1954	2	40.9014	5.48	12.9	268	4.4	1.4	51	21	26	27	201	116	162	53	9	0.55	93	0	0	0	0	0	0	1	1	0	1	156.7	50.7	71	92	20.6	0	102	76	12.96	25.5621	0	60.8	0	0	0		5.2	4.4	0.07
1955	1	63.5041	6.75	14.9	240	4.6	1.3	89	37	53	24	217	144	59	61	20	0.86	90	0	0	0	0	0	0	0	0	0	0	163.4	77.4	95	100	29.1	1	115	79	21.39	27.6357	1	151.7	1	0	0		5.6	6.9	0.03
1956	2	55.3425	5.74	14.4	262	4.2	0.5	72	27	34	12	152	79	160	41	9	0.46	115	1	0	0	1	1	1	1	1	0	1	156.8	66.5	93	96	27	1	107	67	17	25.5639	0	123.2	1	0	0		8.1	3.2	0.05
1957	1	48.6685	16.96	15.1	296	4.2	1	106	26	33	56	161	72	136	62	8	0.92	88	0	1	1	1	1	0	0	0	0	0	175	82.1	100	101	26.8	1	120	78	22.69	27.637	1	158.1	1	1	0	20.9	7	6.5	1.01
1958	2	59.6767	5.73	12.3	214	4	0.6	85	29	24	9	171	101	145	41	17	0.49	87	0	1	1	0	0	1	1	1	1	0	154.7	54.8	74	92	22.8	0	123	81	14.01	25.5657	0	62.5	0	0	0		5.6	3	0.19
1959	2	34.0658	5.83	11.1	371	4.3	0.5	57	14	13	16	168	91	71	63	9	0.63	86	1	0	0	0	0	0	0	0	0	0	161.7	65.4	89	99	24.9	0	107	72	16.72	25.5657	0	87.5	0	0	1		5.6	5.1	0.11
1960	2	62.7452	6.38	14.6	226	4.2	0.9	53	33	34	23	255	172	66	70	17	0.86	95	0	1	1	0	0	0	0	0	0	0	154.1	53	81.5	91	22.3	0	124	84	13.55	25.566	0	75.5	0	0	0		5.5	3	0.04
1961	2	30.3315	7.26	12.6	377	4.1	0.8	39	15	9	14	193	119	71	60	7	0.57	83	1	0	0	0	0	0	0	0	0	0	164	66.5	92	102	24.7	0	93	63	17.0039	25.5698	0	88.0827	0	1	1		5.3	4	0.02
1962	2	36.8137	4.85	13.3	259	4.5	1	58	23	14	10	228	161	52	57	11	0.68	82	0	0	0	0	0	0	0	0	0	0	160.1	59.6	83	107	23.3	0	107	66	15.24	25.5705	0	65.8	0	0	0		5.4	5.9	0.05
1963	2	51.7041	6.14	13.9	345	4.3	0.6	62	57	55	27	157	92	126	40	15	0.71	161	0	1	1	1	1	1	1	1	1	0	158.1	72.5	87	96	29	1	117	87	18.54	25.5724	0	125.3	1	0	0		10.6	4.6	0.21
1964	2	37.9945	3.97	12.9	256	4.1	0.8	46	25	19	13	148	78	53	59	26	2.42	428	1	0	0	0	1	0	0	0	0	0	157.5	56.7	88	97	22.9	0	99	72	14.5	25.5732	0	66.6	0	0	0		5.4	4.2	0.02
1965	2	27.2055	11.16	13.2	318	4.3	0.6	68	15	8	10	170	102	42	60	12	0.72	76	0	0	0	0	0	0	0	0	0	0	158.4	62.4	84	97	25	1	114	68	15.96	25.5769	0	62.3	0	0	0		5.3	4.4	0.04
1966	2	56.2466	4.85	13.1	246	4.2	0.6	77	21	9	21	203	118	144	56	11	0.6	86	0	0	0	0	0	0	0	0	0	0	158	54.5	79	97	21.8	0	103	77	13.94	25.578	0	76.4	0	0	0		5.9	4.8	0.03
1967	1	57.4301	5.17	14.2	225	4.4	1.8	80	31	40	39	112	60	57	41	14	0.77	122	0	1	1	1	1	0	1	1	1	0	168	79.6	100	97	28.2	1	132	73	22	27.6382	1	148.6	1	0	1		9.5	5.6	0.02
1968	1	58.2274	4.39	15.2	287	4.1	1.2	63	32	76	34	189	128	122	37	8	0.73	86	0	1	1	0	0	1	0	1	0	0	164.7	74.2	95	102	27.4	1	103	81	20.51	27.6415	1	143.1	1	0	0		6	5.3	0.14
1969	1	52.8356	5.11	14.5	188	4.4	0.8	65	34	36	18	198	135	141	35	16	0.99	101	0	0	0	0	0	1	0	1	0	0	169.3	67.6	89	96	23.7	0	123	88	18.69	27.6479	1	142.2	1	0	0		5.7	5.8	0.07
1970	2	28.4658	6.17	13.5	282	4.5	1.2	46	17	13	13	178	112	56	55	10	0.64	87	0	0	0	0	0	0	0	0	0	0	151.6	51.8	74	95	22.5	0	99	65	13.25	25.5792	0	67.7	0	0	1		5.2	5.2	0.03
1971	2	59.611	8.62	13.8	284	4.1	0.6	69	29	36	77	264	125	420	55	7	0.52	104	1	0	0	0	0	0	1	1	0	1	157.2	59.5	91	92	24.1	0	108	88	15.22	25.5798	0	107.9	1	1	1		5.9	5.3	0.3
1972	1	68.0384	7.24	17.8	229	4.7	1.5	117	267	222	583	199	112	119	63	15	0.84	100	0	0	0	0	0	0	0	0	0	0	156.2	52	79	87	21.3	0	137	88	14.38	27.6538	1	101.4	1	0	1		4.9	5.6	0.09
1973	2	42.2356	5.66	12.8	271	4.2	0.6	74	25	21	12	174	102	94	53	9	0.7	87	0	0	0	0	0	0	0	0	0	0	153.8	43.9	67	83.5	18.5	0	98	65	11.23	25.5809	0	55.7	0	0	0		5.9	4.7	0.24
1974	1	56.6877	6.8	15	330	4.7	0.8	71	21	24	41	210	108	244	53	12	0.73	99	0	0	1	0	0	0	1	1	0	1	160.8	73.8	98	93	28.5	1	125	95	20.41	27.6558	1	157.2	1	1	1	12.7	6	5.9	0.08
1975	2	52.6575	7.24	14	255	4.7	0.9	61	22	20	16	284	199	61	73	22	0.49	77	0	0	0	0	0	0	0	0	0	0	155.7	51.6	74	90	21.3	0	113	72	13.2	25.5814	0	77.3	0	0	0		5.6	3.6	0.16
1976	1	51.2137	8.12	15.9	269	4.6	0.8	66	23	16	44	229	149	166	47	12	0.86	89	0	1	1	0	0	0	1	1	0	1	171.2	89.5	101	105	30.5	1	120	88	24.76	27.6648	1	187.4	1	1	1		5.6	5.6	0.11
1977	1	52.8932	8.06	17.1	223	4.3	2	71	20	23	82	193	123	160	38	12	0.91	87	0	1	1	0	0	1	1	1	0	1	163.6	78.8	100	103	29.4	1	115	78	21.8	27.665	1	131.8	1	1	1	11.4	5.7	5.9	0.35
1978	2	29.1288	6.77	16.4	273	4.6	0.8	46	26	16	37	217	58	238	111	8	0.71	87	0	0	0	0	0	0	1	1	0	1	159.7	48	71	89	18.8	0	106	77	12.28	25.5833	0	50.3	0	0	1		5.3	5	0.14
1979	1	40.8137	6.27	16.2	170	4.3	0.6	67	29	39	13	153	96	69	43	16	1.01	97	0	0	1	0	0	0	0	0	0	0	171	84.9	93	100	29	1	133	91	23.49	27.6678	1	116.4	1	0	1		5	6.1	0.06
1980	2	52.2027	3.94	14	219	4.3	1.5	112	19	16	10	230	164	87	49	15	0.7	95	1	0	0	0	0	1	0	1	0	0	168.6	60	91	97	21	0	107	87	15.35	25.5833	0	135.9	1	0	0		5.3	4.5	0.05
1981	2	63.8493	8.6	15	245	4.7	1.3	111	22	19	12	193	93	149	70	10	0.81	81	0	0	0	0	0	0	0	0	0	0	150.5	43.7	73	83.5	19.3	0	115	81	11.18	25.5835	0	74	0	0	1		5.3	4.5	0.04
1982	2	46.3288	6.56	14.6	251	4.5	0.7	52	15	13	11	206	134	65	59	9	0.66	97	0	0	0	0	0	0	0	0	0	0	157.2	61.4	84	94	24.9	0	130	77	15.71	25.5863	0	94.8	0	0	0		5.7	5.9	0.1
1983	2	58.9945	8.22	12.3	322	4.7	1.3	78	24	19	33	175	94	93	62	18	0.66	102	0	1	1	0	0	0	1	1	1	0	145.6	51.9	84.5	89	24.5	0	104	67	13.28	25.5877	0	87.7	0	0	0		5.7	5.2	0.68
1984	1	58.7014	7.23	18	336	3.6	0.9	70	24	25	171	289	221	153	37	18	0.63	169	1	1	1	1	1	1	1	1	1	1	179.1	94.1	103	106	29.3	1	147	92	26.04	27.6727	1	176.1	1	0	0		12.1	5.1	0.51
1985	2	48.0356	5.03	13.7	179	4.4	0.8	56	22	21	9	223	136	76	72	12	0.66	82	0	0	1	0	0	0	0	0	0	0	162.4	66.1	87	104	25.2	1	129	91	16.9135	25.5877	0	72.8848	0	0	0		5.7	3.9	0.03
1986	2	60.0438	6.51	14.2	241	4.2	1.4	66	16	25	63	249	171	168	44	16	0.62	93	0	1	1	0	0	1	1	1	0	1	154.7	56.9	83	89	23.8	0	134	94	14.56	25.5888	0	117.6	1	1	1		5.6	4.5	0.3
1987	2	65.4767	4.53	13.6	232	4.3	1.9	75	39	30	51	153	78	114	52	14	0.87	108	1	1	1	0	0	0	0	0	0	0	150.6	55.6	96	93	24.5	0	135	86	14.23	25.5935	0	84.5	0	0	0		6	5.3	0.11
1988	2	78.9836	4.1	12.4	264	4	0.6	47	33	37	14	189	117	80	56	11	0.67	96	0	0	0	0	0	0	0	0	0	0	143.8	46.3	76	90	22.4	0	126	88	11.85	25.594	0	73.5	0	0	0		5.4	3.8	0.02
1989	2	61.7452	7.78	13.6	341	4.6	1	52	19	22	27	247	167	87	63	17	0.8	112	1	1	1	0	0	0	0	0	0	0	159.9	63.1	89	90	24.7	0	110	77	16.15	25.5943	0	125.6	1	0	0		5.9	4.9	0.32
1990	1	54.3562	6.87	15.9	243	4.4	1.6	94	61	66	313	245	150	102	75	13	0.98	96	0	0	1	0	0	0	0	0	0	0	163.8	68.9	85.5	95	26.2	1	171	112	19.07	27.6778	1	159.8	1	0	1		5.2	8.4	0.16
1991	2	50.3753	5.28	13.4	291	3.9	1.4	91	26	29	21	201	134	126	42	9	0.79	96	0	0	0	0	0	1	0	1	0	0	152.8	61.3	86	94	26.2	1	112	83	15.69	25.5954	0	71.5	0	0	0		5.4	4.5	0.17
1992	2	48.0274	5.2	15.4	397	4.2	0.7	79	19	24	30	295	215	121	56	11	0.73	89	0	0	0	0	0	0	0	0	0	0	155.7	58.6	85	95	24.1	0	126	87	15	25.5973	0	77.5	0	0	1		5.2	4.8	0.02
1993	2	57.5863	5.68	13	272	3.9	0.6	54	22	15	11	210	128	69	68	9	0.49	89	0	0	0	0	0	0	1	1	1	0	152.5	47.7	86	92	20.5	0	97	67	12.21	25.5975	0	69.2	0	0	0		5.6	3.5	0.04
1994	2	57.2082	5.6	14.5	209	4.4	1.1	89	28	22	12	262	165	156	66	13	0.6	88	0	0	0	0	0	0	1	1	0	1	161.8	64.3	87	92	24.5	0	122	75	16.46	25.5988	0	124.3	1	0	0		6	4.5	0.09
1995	2	27	6.75	13.5	295	4.3	0.3	63	15	9	12	153	81	79	56	9	0.56	89	0	0	0	0	0	0	0	0	0	0	154.6	52.5	79	97	22	0	104	69	13.44	25.6	0	55.4	0	0	1		5.2	3.7	1.46
1996	2	63.5644	3.85	12.6	252	4.3	0.9	57	23	14	11	249	162	86	70	10	0.53	83	0	0	0	0	0	0	0	0	0	0	149.3	44.1	73	87	19.8	0	114	74	11.29	25.6009	0	50.8	0	0	1		5.1	3.7	0.02
1997	2	63.737	5.66	13.5	299	4.3	0.7	79	49	69	75	218	142	213	33	12	0.52	124	0	0	0	0	0	1	1	1	0	1	157.6	55.5	82	90	22.3	0	119	80	14.21	25.6036	0	87.5	0	0	0		7.5	4	0.32
1998	2	57.0795	3.56	13.8	209	4.3	0.7	90	31	20	15	188	105	38	75	14	0.68	90	0	0	0	0	0	0	0	0	0	0	152	53	75	98	22.9	0	128	68	13.57	25.6038	0	67.9	0	0	0		5.3	4.6	0.04
1999	1	44.189	9.38	16.7	354	4.9	1.3	82	62	128	52	204	124	203	39	13	0.85	93	1	0	0	0	0	1	1	1	0	1	183.7	111.2	114	113	33	1	113	78	30.79	27.6888	1	219.4	1	1	1		5.6	7.4	0.65
[truncated: 11,621 more rows]
